# Supplementary material for: Charge-induced facial-selectivity in the formation of new cationic planar chiral iridacycles derived from aniline
Source: Royal Society of Chemistry journal article supplement (doi:10.1039/c0cc05711h), 2011-01-01
Supplement: c0cc05711h.pdf [file c0cc05711h.pdf]

# **Charge-induced facial selectivity in the formation of new cationic planar chiral iridacycles derived from aniline.**

**Jean-Pierre Djukic,<sup>\*</sup> Wissam Iali, Michel Pfeffer and Xavier-Frédéric Le Goff**

**ESI**

|                                                                                                              |     |
|--------------------------------------------------------------------------------------------------------------|-----|
| <b>Figure S1</b> .....                                                                                       | 3   |
| <b>Crystal Data (succinct form)</b> .....                                                                    | 4   |
| <b>Experimental procedures</b> .....                                                                         | 5   |
| Complex <b>2a</b> .....                                                                                      | 6   |
| Complex <b>2b</b> .....                                                                                      | 8   |
| Complex <b>1c</b> .....                                                                                      | 10  |
| Complex <b>1d</b> .....                                                                                      | 12  |
| Complex <b>endo-3a</b> .....                                                                                 | 14  |
| Complex <b>5a</b> .....                                                                                      | 16  |
| <b>Synthesis of 5a by an alternative method</b> .....                                                        | 18  |
| Complex <b>5b</b> .....                                                                                      | 19  |
| Complex <b>4a</b> .....                                                                                      | 21  |
| Ligand <b>1b</b> .....                                                                                       | 23  |
| <b>Dependence of the <sup>1</sup>H NMR spectrum of endo-3a on the nature of the counter anion.</b> .....     | 25  |
| <b>Variable Temperature <sup>1</sup>H NMR experiments</b> .....                                              | 26  |
| <b>Crystallographic data</b> .....                                                                           | 28  |
| <b>2a</b> .....                                                                                              | 29  |
| <b>3a</b> .....                                                                                              | 41  |
| <b>4a</b> .....                                                                                              | 47  |
| <b>5b</b> .....                                                                                              | 55  |
| <b>Computational details</b> .....                                                                           | 62  |
| <b>Theoretical and Computational details.</b> .....                                                          | 62  |
| <b>Coulomb potential maps for the following models drawn over the SCF electron density isosurface.</b> ..... | 63  |
| <b>III, charge 2+ (0.035 e/bohr<sup>3</sup>)</b> .....                                                       | 63  |
| <b>IV, charge 1+ (0.025 e/bohr<sup>3</sup>)</b> .....                                                        | 63  |
| <b>V, neutral (0.025 e/bohr<sup>3</sup>)</b> .....                                                           | 63  |
| <b>Dimethylaniline at TPSS/TZP</b> .....                                                                     | 64  |
| <b>TS-dimethylaniline at TPSS</b> .....                                                                      | 66  |
| <b>dimethylaniline BP86/TZP,DZP</b> .....                                                                    | 68  |
| <b>TS-dimethylaniline BP86/TZP,DZP</b> .....                                                                 | 70  |
| <b>TS1-V</b> .....                                                                                           | 75  |
| <b>TS2-V</b> .....                                                                                           | 78  |
| <b>II</b> .....                                                                                              | 81  |
| <b>TS2-II</b> .....                                                                                          | 84  |
| <b>TS1-II</b> .....                                                                                          | 87  |
| <b>IV</b> .....                                                                                              | 90  |
| <b>TS1-IV</b> .....                                                                                          | 93  |
| <b>TS2-IV</b> .....                                                                                          | 96  |
| <b>III</b> .....                                                                                             | 99  |
| <b>TS1-III</b> .....                                                                                         | 102 |
| <b>TS2-III</b> .....                                                                                         | 105 |
| <b>[endo-3a] 2+</b> .....                                                                                    | 108 |
| <b>TS1- [endo-3a] 2+</b> .....                                                                               | 112 |
| <b>TS2- [endo-3a] 2+</b> .....                                                                               | 117 |
| <b>References</b> .....                                                                                      | 122 |

**Figure S1**

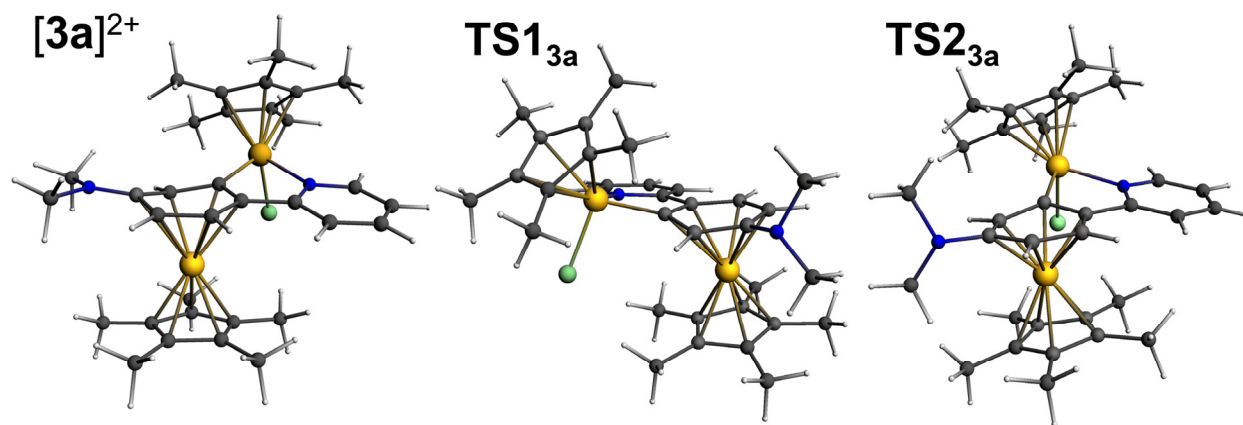

**Fig. S1** Singlet ground state geometry for [*endo*-**3a**]<sup>2+</sup> and singlet transition state geometries **TS1**<sub>3a</sub> and **TS2**<sub>3a</sub> computed at the COSMO (acetone) ZORA-PBE/all electron TZP(Ir),DZP(H,C,N,Cl) level. **TS1**<sub>3a</sub>, 105*i* cm<sup>-1</sup>; **TS2**<sub>3a</sub>, 95*i* cm<sup>-1</sup>. Atoms are colored as follows: yellow, Ir; green, Cl; blue, N; grey, C; white, H. Selected interatomic distances and angle for [*endo*-**3a**]<sup>2+</sup>: *d*<sub>M</sub>, 2.476 Å; *d*<sub>N</sub>, 1.337 Å; *d*<sub>Cl</sub>, 2.420 Å; α, 114.1 deg; C<sub>ipso</sub>-N-C<sub>Me</sub>, 120.9-120.5 deg. *wbi* (C<sub>Ar</sub>-N)= 1.30. Selected interatomic distances and angle for **TS1**<sub>3a</sub>(identical values are found for **TS2**<sub>3a</sub>): *d*<sub>M</sub>, 2.318 Å; *d*<sub>N</sub>, 1.425 Å; *d*<sub>Cl</sub>, 2.424 Å; α, 118.4 deg; C<sub>ipso</sub>-N-C<sub>Me</sub> *endo*, 115.9 deg; C<sub>ipso</sub>-N-C<sub>Me</sub> *exo*, 110.9 deg. *wbi* (C<sub>Ar</sub>-N) = 1.01.

### Crystal Data (succinct form)

Crystal data for **2a**:  $C_{23}H_{28}ClIrN_2$ ,  $M_r = 560.12$  g/mol,  $0.38 \times 0.30 \times 0.20$  mm<sup>3</sup>, monoclinic,  $P2_1/c$ ,  $a = 16.5371(6)$ ,  $b = 7.5131(3)$ ,  $c = 20.9885(6)$  Å,  $\beta = 128.903(2)^\circ$ ,  $V = 2029.35(12)$  Å<sup>3</sup>,  $Z = 4$ ,  $\rho_{\text{calcd}} = 1.833$  g cm<sup>-3</sup>,  $\mu = 6.72$  mm<sup>-1</sup>,  $T = 173(2)$  K,  $\theta_{\text{max}} = 32.1$ , 20707 reflections measured, 7014 independent reflections,  $R_{\text{int}} = 0.017$ ,  $R = 0.023$ ,  $wR^2 = 0.052$ , CCDC 805113. [*endo-3a*][PF<sub>6</sub>]<sub>2</sub>:  $C_{33}H_{43}ClIrN_2 \cdot 2(F_6P) \cdot C_3H_6O$ ,  $M_r = 1235.56$  g/mol,  $0.28 \times 0.12 \times 0.10$  mm<sup>3</sup>, monoclinic,  $P2_1/c$ ,  $a = 13.019(1)$ ,  $b = 20.090(1)$ ,  $c = 17.132(1)$  Å,  $\beta = 108.824(1)^\circ$ ,  $V = 4241.2(5)$  Å<sup>3</sup>,  $Z = 4$ ,  $\rho_{\text{calcd}} = 1.935$  g cm<sup>-3</sup>,  $\mu = 6.492$  mm<sup>-1</sup>,  $T = 150(2)$  K,  $\theta_{\text{max}} = 30.02$ , 30593 reflections measured, 12327 independent reflections,  $R_{\text{int}} = 0.0464$ ,  $R = 0.0440$ ,  $wR^2 = 0.1312$ , CCDC 805114. [*endo-4a*][PF<sub>6</sub>]:  $C_{33}H_{43}ClIrN_2RuF_6P$ ,  $M_r = 941.38$  g/mol,  $0.24 \times 0.18 \times 0.12$  mm<sup>3</sup>, monoclinic,  $P2_1/c$ ,  $a = 8.671(1)$ ,  $b = 13.989(1)$ ,  $c = 28.862(1)$  Å,  $\beta = 105.194(2)^\circ$ ,  $V = 3378.5(5)$  Å<sup>3</sup>,  $Z = 4$ ,  $\rho_{\text{calcd}} = 1.851$  g cm<sup>-3</sup>,  $\mu = 4.568$  mm<sup>-1</sup>,  $T = 150(2)$  K,  $\theta_{\text{max}} = 30.02$ , 29565 reflections measured, 9531 independent reflections,  $R_{\text{int}} = 0.0298$ ,  $R = 0.0314$ ,  $wR^2 = 0.0704$ , CCDC 805115. [*exo-5b*]<sup>0</sup>:  $C_{30}H_{36}ClCrIrN_2O_3 \cdot C_3H_6O$ ,  $M_r = 810.34$  g/mol,  $0.34 \times 0.04 \times 0.02$  mm<sup>3</sup>, monoclinic,  $P2_1/c$ ,  $a = 10.649(1)$ ,  $b = 15.812(1)$ ,  $c = 21.131(1)$  Å,  $\beta = 107.397(3)^\circ$ ,  $V = 3395.3(4)$  Å<sup>3</sup>,  $Z = 4$ ,  $\rho_{\text{calcd}} = 1.585$  g cm<sup>-3</sup>,  $\mu = 4.351$  mm<sup>-1</sup>,  $T = 150(2)$  K,  $\theta_{\text{max}} = 29.95$ , 26792 reflections measured, 9667 independent reflections,  $R_{\text{int}} = 0.0494$ ,  $R = 0.0495$ ,  $wR^2 = 0.0624$ , CCDC 805116. For all structures Mo K $\alpha$  radiation (0.71073 Å).

## Experimental procedures

All experiments were carried out under a dry argon atmosphere using the standard Schlenk technique or in an argon filled glove-box when necessary. Anhydrous THF was distilled from purple solutions of Na/benzophenone under argon. All other solvents were distilled over sodium or CaH<sub>2</sub> under argon. Deuterated solvents were dried over sodium or CaH<sub>2</sub> and purified by trap-to-trap techniques, degassed by freeze-pump-thaw cycles and stored under argon. <sup>1</sup>H, <sup>13</sup>C NMR spectra were obtained on Bruker DPX 300, 400 or Avance 500 spectrometers. Chemical shifts were referenced against solvent peaks or external references.

# Complex **2a**

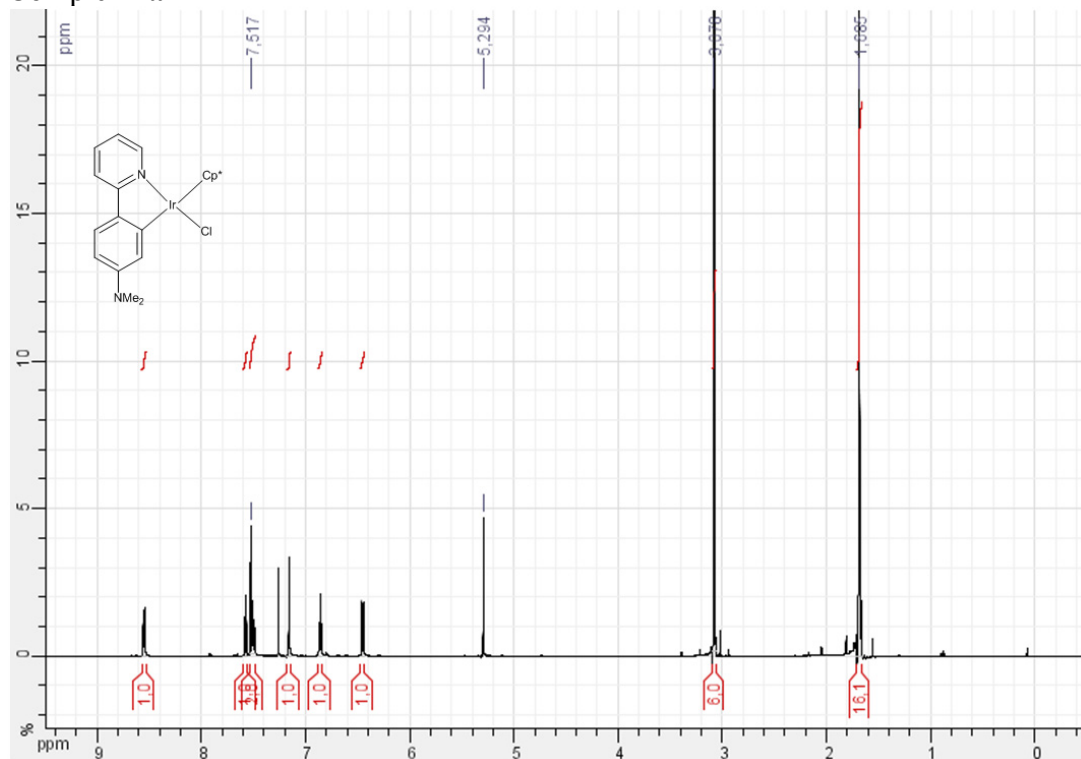

**Figure 2**  $^1\text{H}$  NMR in  $\text{CDCl}_3$

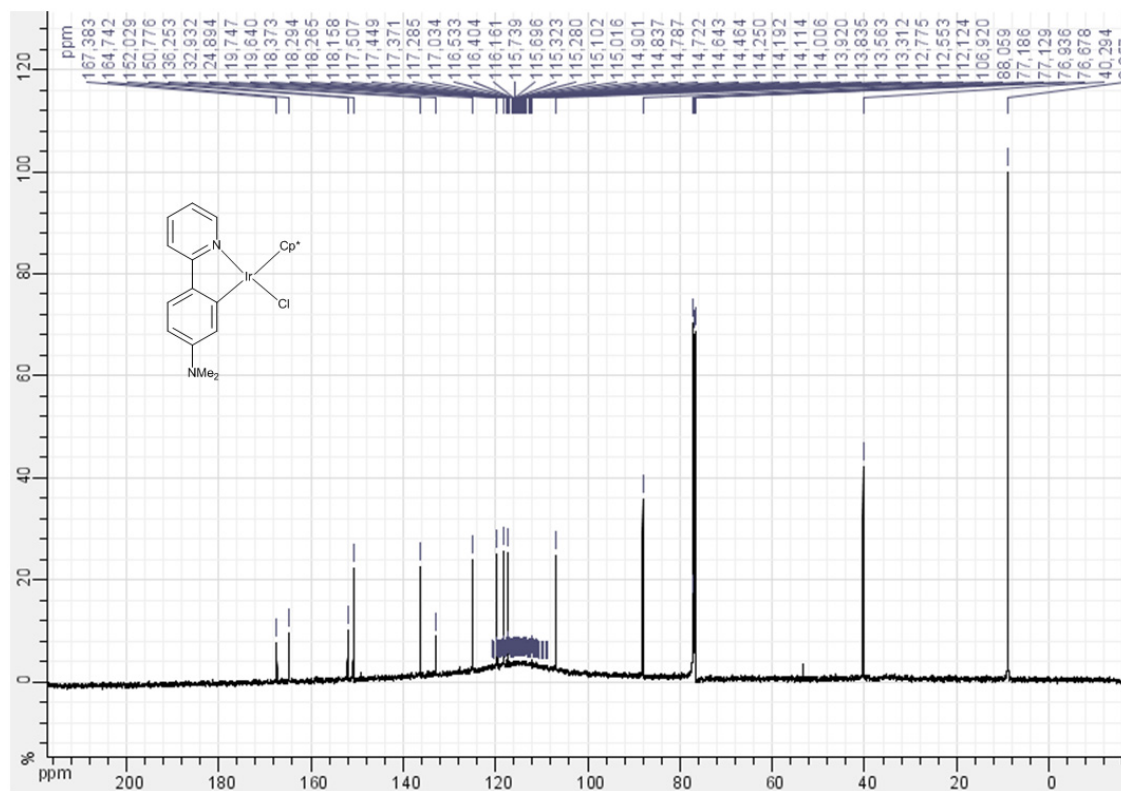

**Figure 3**  $^{13}\text{C}$  NMR in  $\text{CDCl}_3$

A mixture  $[\text{Cp}^*\text{IrCl}_2]_2$  (500 mg, 0.628 mmol), NaOAc (307 mg, 3.75 mmol) and **1a** (251 mg, 1.25

mmol ) was stirred in 15 mL of CH<sub>2</sub>Cl<sub>2</sub> at room temperature for 24h. Cyclometalated compound **2a** was isolated as a yellow-orange solid upon recrystallization in 80% yield (559.5 mg). Anal. Calcd for C<sub>23</sub>H<sub>28</sub>ClIrN<sub>2</sub>. 1/4 CH<sub>2</sub>Cl<sub>2</sub>: C, 48.03; H, 4.94; N, 4.82. Found: C, 48.04; H, 4.743; N, 4.717. <sup>1</sup>H NMR (CDCl<sub>3</sub>): δ 1.68 (s, 15 H, C<sub>5</sub>Me<sub>5</sub>), 3.08 (s, 6 H, NMe<sub>2</sub>), 6.45 (dd, 1 H, <sup>4</sup>J = 2.6, <sup>3</sup>J = 8.6 Hz), 6.86 (ddd, 1 H, <sup>4</sup>J = 1.5, <sup>3</sup>J = 5.7, <sup>3</sup>J = 7.2 Hz), 7.16 (d, 1 H, <sup>4</sup>J = 2.5 Hz), 7.50 (m, 1 H, <sup>4</sup>J = 1.3, <sup>4</sup>J = 2.6, <sup>3</sup>J = 7.5 Hz), 7.53 (d, 1 H, <sup>3</sup>J = 8.5 Hz), 7.58 (dd, <sup>2</sup>J = 1.41, <sup>3</sup>J = 8.12 Hz), 8.55 (d, 1 H, <sup>3</sup>J = 5.8 Hz). <sup>13</sup>C NMR(CDCl<sub>3</sub>): δ 167.4, 164.7, 152.0, 150.7, 136.2, 132.9, 124.8, 119.6, 118.1, 117.3, 106.9, 88.0, 40.29, 8.8.

## Complex **2b**

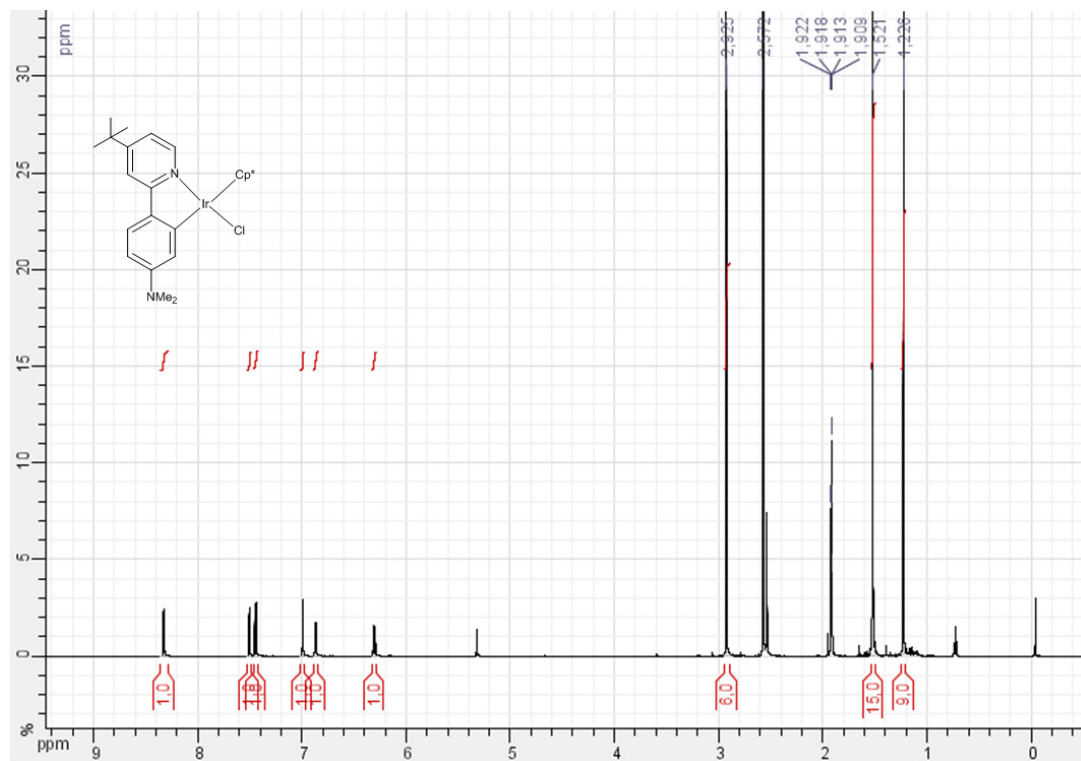

**Figure 4** NMR (<sup>1</sup>H) in CD<sub>2</sub>Cl<sub>2</sub> with sight contamination by acetone

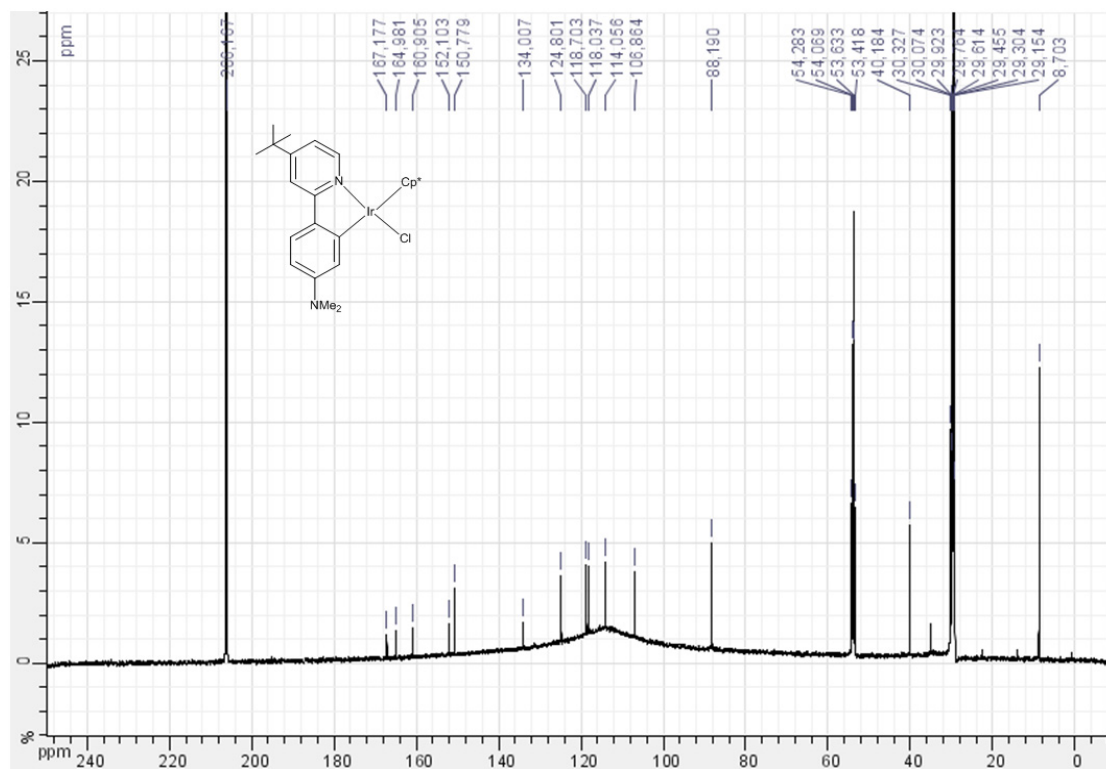

**Figure 5** NMR <sup>13</sup>C in CD<sub>2</sub>Cl<sub>2</sub> with sight contamination by acetone

Similar procedure was applied for the synthesis of complex **2b**: [Cp\*IrCl<sub>2</sub>]<sub>2</sub> (800 mg, 1 mmol), **1b** (510

mg, 2 mmol) and NaOAc (350 mg, 4.26 mmol) in 20 mL of CH<sub>2</sub>Cl<sub>2</sub>. yield is 80% (986.4 mg).

Anal. Calcd for C<sub>27</sub>H<sub>36</sub>ClIrN<sub>2</sub>: C, 52.6; H, 5.89; N, 4.55. Found: C, 52.52; H, 5.812; N, 4.433. <sup>1</sup>H NMR (CD<sub>2</sub>Cl<sub>2</sub>): δ 1.23 (s, 9 H, tBu), 1.52 (s, 15 H, C<sub>5</sub>Me<sub>5</sub>), 2.92 (s, 6 H, NMe<sub>2</sub>), 6.30 (dd, 1 H, <sup>4</sup>J = 2.6, <sup>3</sup>J = 8.6 Hz), 6.87 (dd, 1 H, <sup>4</sup>J = 2.1, <sup>3</sup>J = 6.2 Hz), 6.99 (d, 1 H, <sup>4</sup>J = 2.6 Hz), 7.44 (d, 1 H, <sup>3</sup>J = 8.6 Hz), 7.50 (d, 1 H, <sup>4</sup>J = 2.1 Hz), 8.33 (d, 1 H, J = 6.2 Hz). <sup>13</sup>C NMR (CD<sub>2</sub>Cl<sub>2</sub>): δ 167.17, 164.9, 160.9, 152.1, 150.8, 134.0, 124.8, 118.7, 118.0, 114.0, 106.8, 88.2, 40.2, 30.3, 8.7.

### Complex 1c

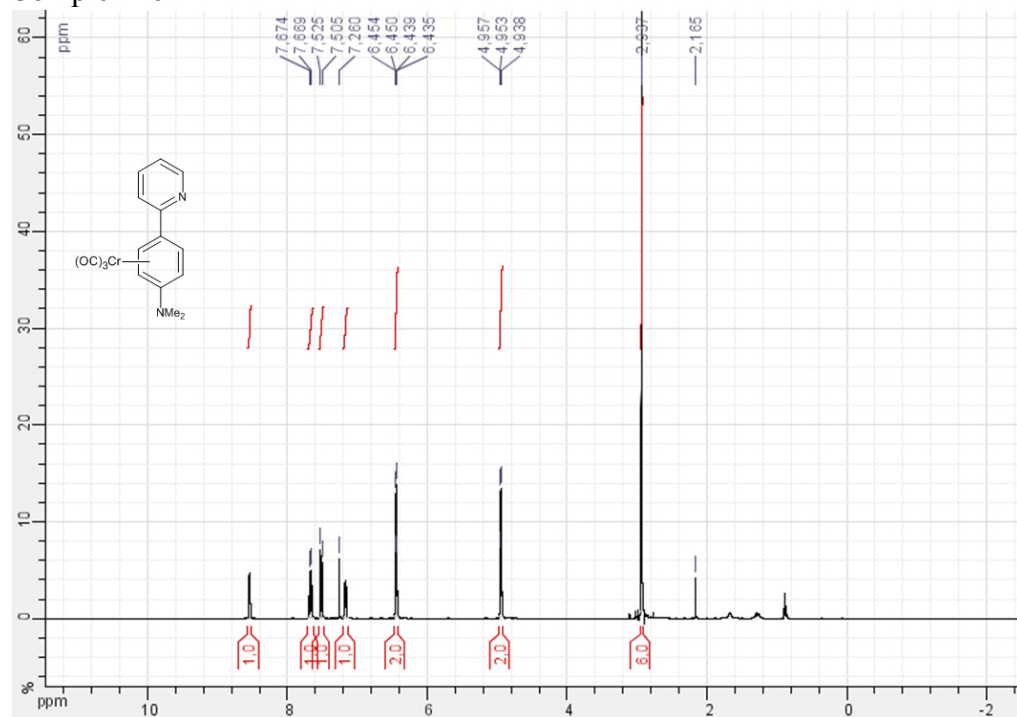

**Figure 6** NMR <sup>1</sup>H in CDCl<sub>3</sub>

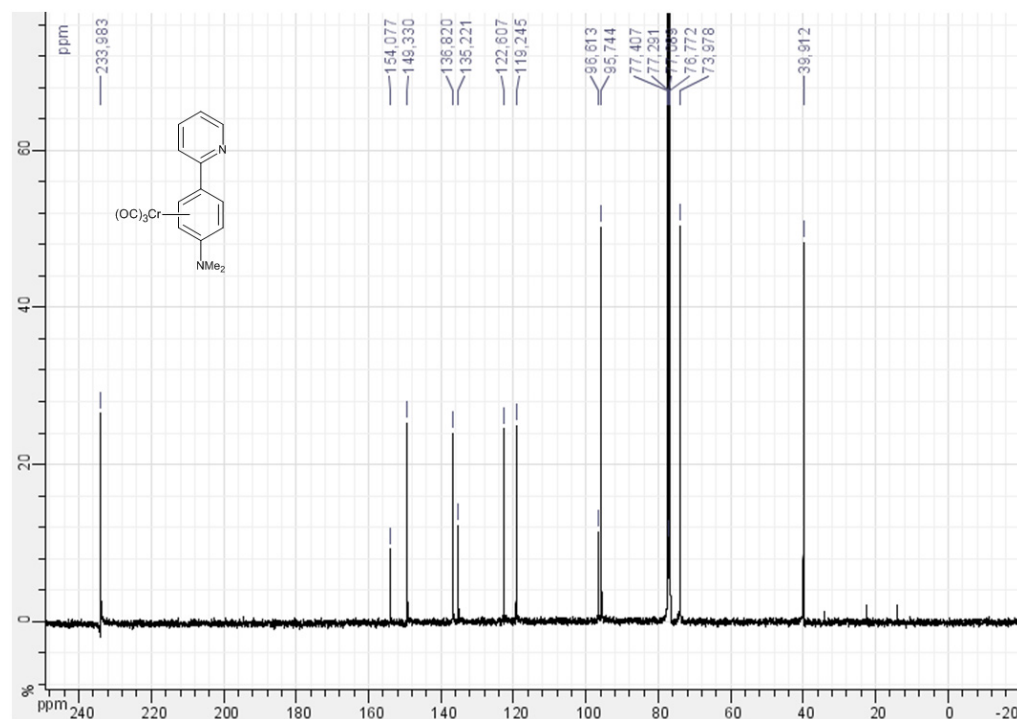

**Figure 7** NMR <sup>13</sup>C in CDCl<sub>3</sub>

A mixture of **1a** (1.335 g, 6.74 mmol) and Cr(CO)<sub>6</sub> (1.63 g, 7.416 mmol) was dissolved in *n*-Bu<sub>2</sub>O (150 mL), and THF (10 mL) was added to the resulting mixture. The suspension was gently refluxed for 7

days under argon. The resulting yellow solution was cooled to room temperature and filtered through Celite. The filtrate was evaporated under reduced pressure, the resulting oil dissolved in  $\text{CH}_2\text{Cl}_2$ , and silica gel added. After evaporation of the solvent under reduced pressure, the coated silica gel was loaded on the top of a  $\text{SiO}_2$  column packed in mixture pentane/ acetone (95/5). Complex **1c** was eluted with pentane/acetone (85/15), the polarity was increased. The solvent was removed under vacuum and the bright yellow solid. The yield is 76% (1.7 g). Anal. Calcd for  $\text{C}_{16}\text{H}_{14}\text{CrN}_2\text{O}_3$ : C, 57.47; H, 4.22; N, 8.38. Found: C, 57.47; H, 4.188; N, 8.248. (IR)  $\nu$ = 1936(s), 1835(vs) ( $\text{C}=\text{O}$ ).  $^1\text{H}$  NMR ( $\text{CDCl}_3$ ):  $\delta$  2.94 (s, 6 H,  $\text{NMe}_2$ ), 4.95 (d, 2 H,  $^3J = 7.4$  Hz), 6.44 (d, 2 H,  $^3J = 7.3$  Hz), 7.17 (dd, 1 H,  $^3J = 4.89$ ,  $^3J = 7.4$  Hz), 7.51 (d, 1 H,  $^3J = 8.1$  Hz), 7.67 (dd, 1 H,  $^4J = 1.66$ ,  $^3J = 6$  Hz), 8.54 (d, 1 H,  $^3J = 5.0$  Hz).  $^{13}\text{C}$  NMR ( $\text{CDCl}_3$ ):  $\delta$  233.9, 154.0, 136.8, 135.2, 122.6, 119.2, 96.6, 95.7, 73.9, 39.9.

**Complex 1d**

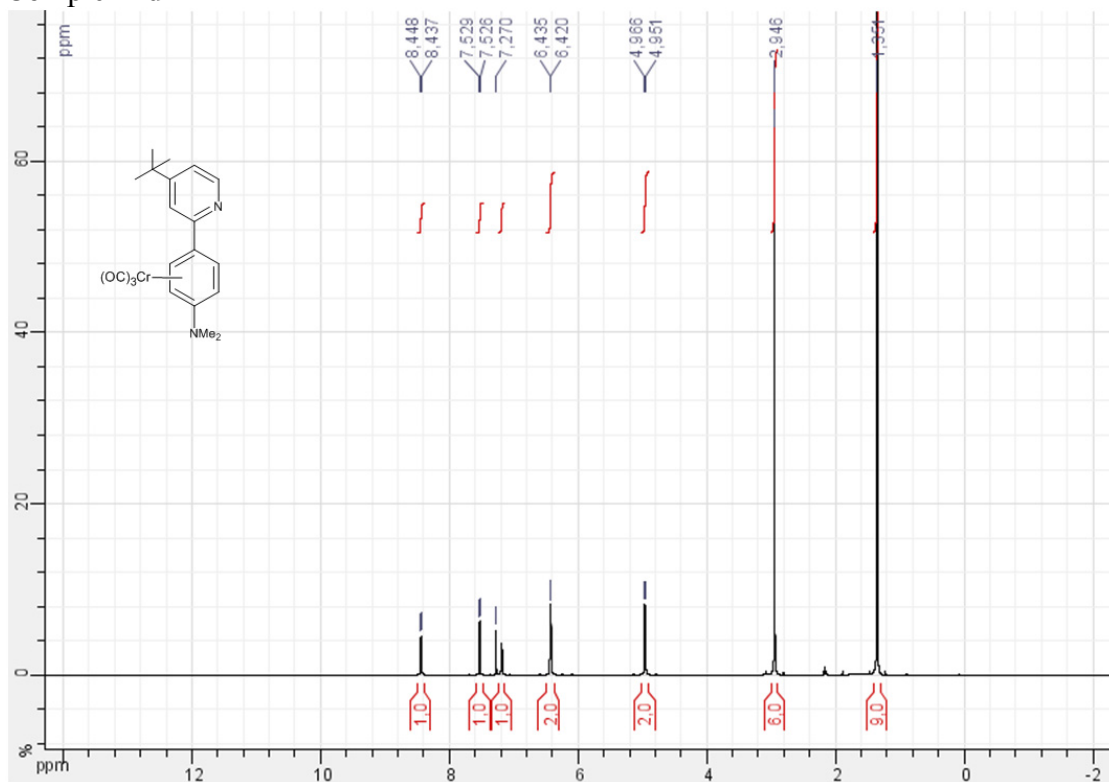

**Figure 8**  $^1\text{H}$  NMR in  $\text{CDCl}_3$

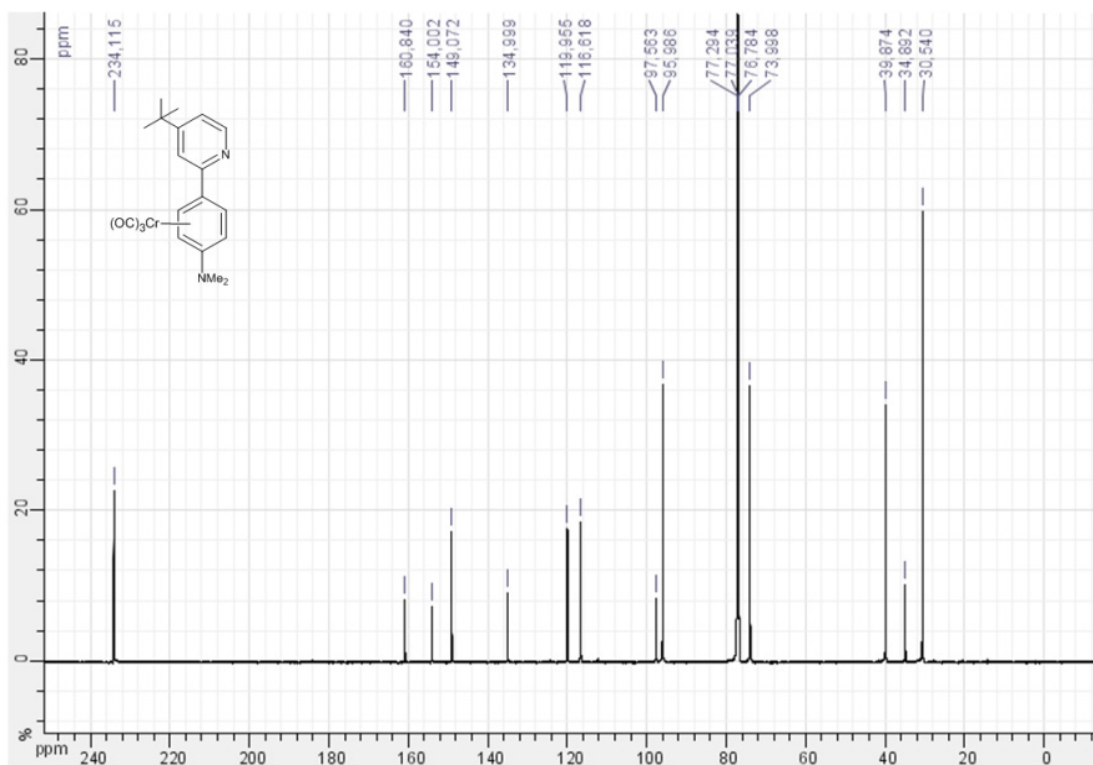

**Figure 9**  $^{13}\text{C}$  NMR in  $\text{CDCl}_3$

A similar procedure was applied for the synthesis of complex **1d**: **1a** (2 g, 7.84 mmol) and Cr(CO)<sub>6</sub> (1.9 g, 8.62 mmol). The yield is 71.8 % (2.2 g). Anal. Calcd for C<sub>20</sub>H<sub>22</sub>CrN<sub>2</sub>O<sub>3</sub>: C, 61.51; H, 5.68; N, 7.18. Found: C, 61.35; H, 5.82; N, 7.04. (IR)  $\nu$ = 1936, 1840 (C=O). <sup>1</sup>H NMR (CDCl<sub>3</sub>):  $\delta$  1.35 (s, 9 H, tBu), 2.94 (s, 6 H, NMe<sub>2</sub>), 4.96 (d, 2 H, <sup>3</sup>J = 7.3 Hz), 6.43 (d, 2 H, <sup>3</sup>J = 7.3 Hz), 7.19 (dd, 1 H, <sup>4</sup>J = 1.8, <sup>3</sup>J = 5.3 Hz), 7.53 (d, 1 H, <sup>4</sup>J = 1.9 Hz), 8.44 (d, 1 H, <sup>3</sup>J = 5.3 Hz). <sup>13</sup>C NMR (CDCl<sub>3</sub>):  $\delta$  234.1, 160.8, 154.0, 149.0, 13, 1, 116.6, 97.5, 96, 7, 39.8, 34.8, 30.5.

Complex endo-**3a**

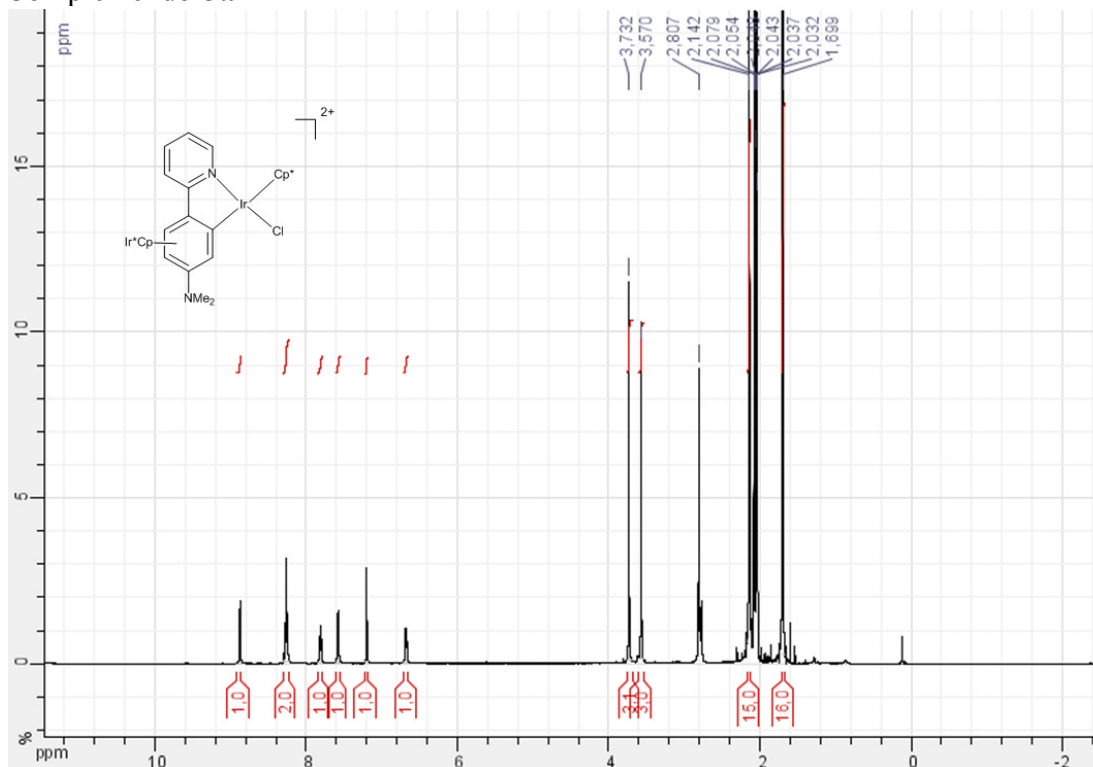

**Figure 10**  $^1\text{H}$  NMR in  $d_6$ -acetone

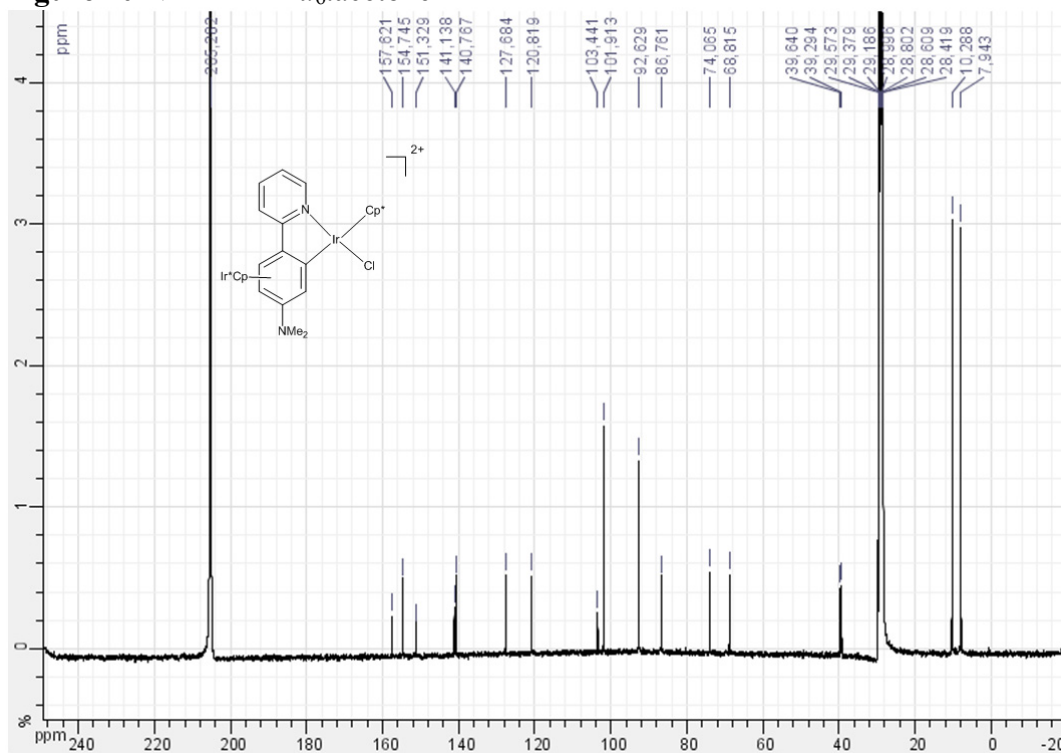

**Figure 11**  $^{13}\text{C}$  NMR in  $d_6$ -acetone

A solution of compound **2a** (230 mg, 0.41 mmol) in acetone (8 mL) was added to a freshly prepared solution of  $[\text{Cp}^*\text{Ir}(\text{CH}_3\text{COCH}_3)_3](\text{PF}_6)_2$  [generated in situ by reaction of  $[\text{Cp}^*\text{IrCl}_2]_2$  (200 mg, 0.25

mmol) and AgPF<sub>6</sub> (253 mg, 1 mmol) in acetone (8 mL) at room temperature 30 minutes] and the resulting solution was left to stir for 24 h at room temperature. Upon filtration of the reaction mixture, the filtrate was concentrated and the resulting precipitate was washed with pentane (15 mL). The compound was recrystallized and subsequently isolated as an orange solid with a yield of 78% (370 mg). Anal. Calcd for C<sub>33</sub>H<sub>43</sub>ClF<sub>12</sub>Ir<sub>2</sub>N<sub>2</sub>P<sub>2</sub>: C, 33.66 ; H, 3.69; N, 2.38. Found: C, 33.82; H, 4.104; N, 2.108. <sup>1</sup>H NMR (*d*<sub>6</sub>.acetone): δ 1.7 (s, 15 H, C<sub>5</sub>Me<sub>5</sub>), 2.14 (s, 15 H, C<sub>5</sub>Me<sub>5</sub>), 3.57 (s, 3 H, NMe), 3.73 (s, 3 H, NMe), 6.68 (dd, 1 H, <sup>4</sup>*J* = 2.4, <sup>3</sup>*J* = 7.1 Hz), 7.2 (d, 1 H, <sup>4</sup>*J* = 2.3 Hz), 7.58 (d, 1 H, <sup>3</sup>*J* = 7.0 Hz), 7.81 (ddd, 1 H, <sup>4</sup>*J* = 2.3, <sup>3</sup>*J* = 5.7, <sup>3</sup>*J* = 6.6 Hz), 8.27 (m, 2 H, <sup>3</sup>*J* = 1.7, <sup>3</sup>*J* = 5.4, <sup>3</sup>*J* = 7.0 Hz), 8.88 (d, 1 H, <sup>3</sup>*J* = 5.5 Hz). <sup>13</sup>C NMR (*d*<sub>6</sub>.acetone): δ 157.6, 154.7, 151.3, 141.1, 140.7, 127.7, 120.8, 103.4, 101.9, 92.6, 86.7, 74.0, 68.8, 39.6, 39.3, 10.3, 7.9.

Complex **5a**

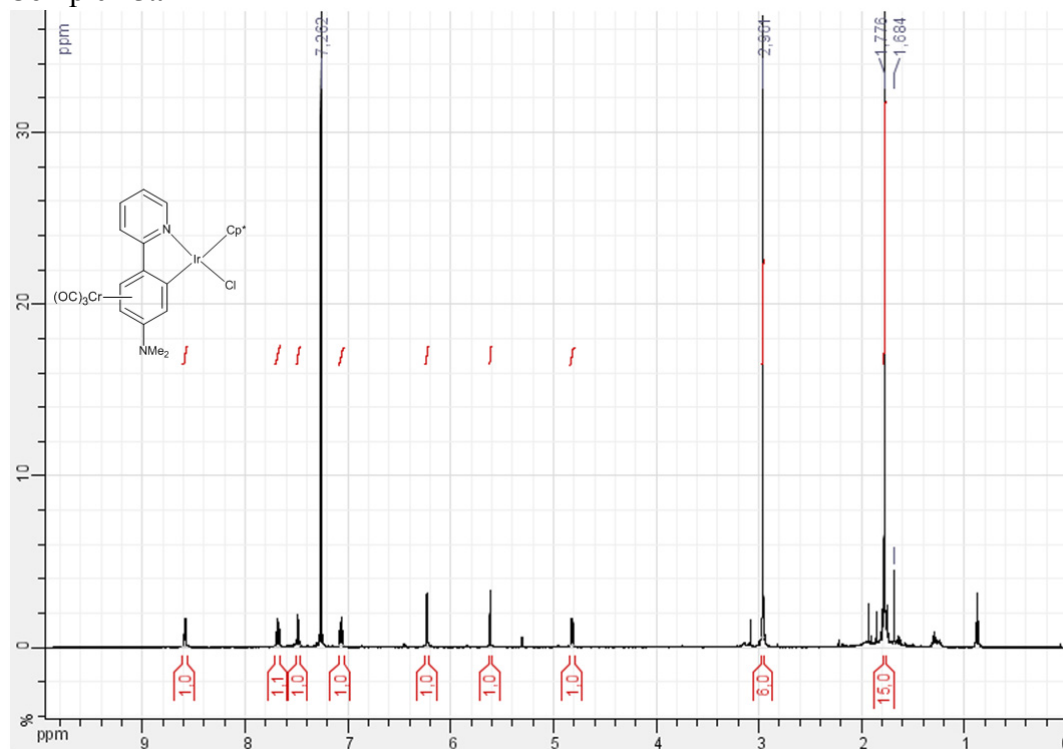

**Figure 12**  $^1\text{H}$  NMR in  $\text{CDCl}_3$

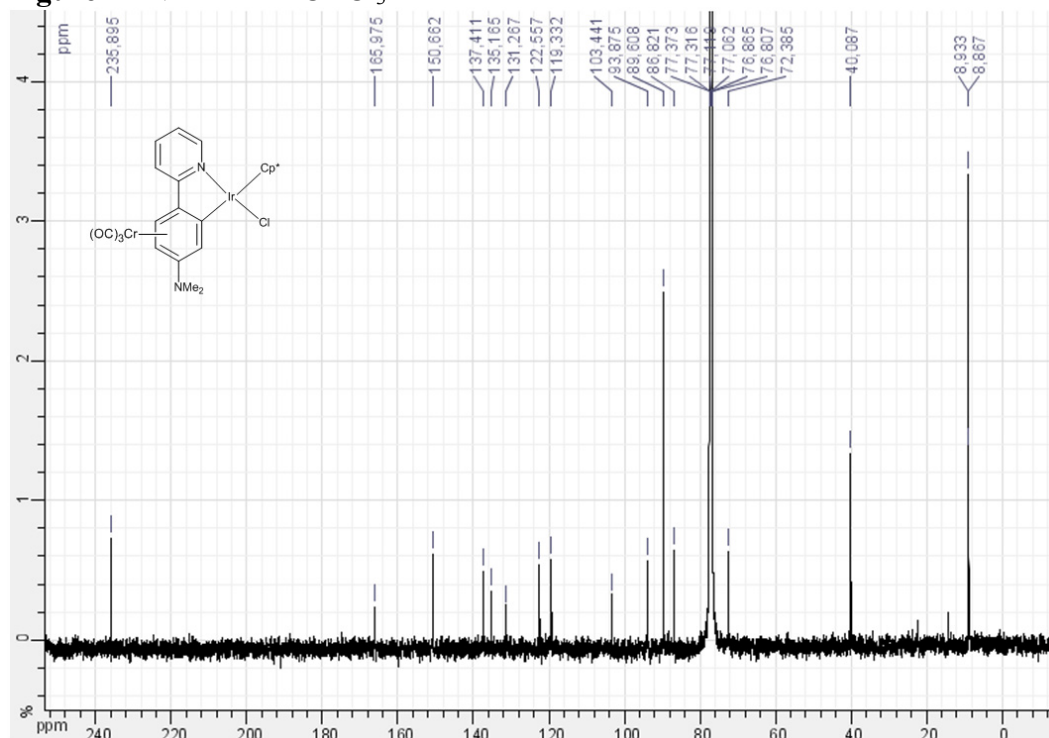

**Figure 13**  $^{13}\text{C}$  NMR in  $\text{CDCl}_3$

$[\text{Cp}^*\text{IrCl}_2]_2$  (0.498 mmol), **1c** (336 mg, 1.006 mmol) and  $\text{NaOAc} \cdot 3\text{H}_2\text{O}$  (324 mg, 3.95 mmol) were dissolved in dichloromethane (20 mL), and the resulting mixture was stirred at room temperature for 24 h under argon. The resulting red solution was filtered through Celite, the filtrate was evaporated to

dryness under reduced pressure to afford an orange solid, which was recrystallized from a mixture of pentane (15 mL) and dichloromethane (5 mL) and dried under reduced pressure overnight. Compound **5a** was recovered as an orange powder with a yield of 75% (520 mg). Anal. Calcd for  $C_{26}H_{28}ClCrIrN_2O_3 \cdot 0.3CH_2Cl_2$ : C, 43.77; H, 3.99; N, 3.88. Found: C, 43.76; H, 4.16; N, 3.55. (IR)  $\nu = 1917, 1829$  (C=O).  $^1H$  NMR ( $CDCl_3$ ):  $\delta$  1.77 (s, 15 H,  $C_5Me_5$ ), 2.96 (s, 6 H,  $NMe_2$ ), 4.82 (dd, 1 H,  $^4J = 2.4$ ,  $^3J = 7.1$  Hz), 5.61 (d, 1 H,  $^4J = 2.4$  Hz), 6.23 (d, 1 H,  $^3J = 7.1$  Hz), 7.07 (ddd, 1 H,  $^4J = 1.4$ ,  $^3J = 5.8$ ,  $^3J = 7.5$  Hz), 7.49 (d, 1 H,  $^3J = 8.2$  Hz), 7.68 (dt, 1 H,  $^2J = 1.5$ ,  $^3J = 7.8$  Hz), 8.59 (d, 1 H,  $^3J = 5.8$  Hz).  $^{13}C$  NMR ( $CDCl_3$ ):  $\delta$  235.9, 165.9, 150.6, 137.4, 135.1, 131.2, 122.5, 119.3, 103.4, 93.9, 89.6, 86.8, 72.4, 40.1, 8.9.

### **Synthesis of 5a by an alternative method**

**2a** (159 mg, 0.282 mmol) and tricarbonyl( $\eta^6$ -naphthalene)chromium (108 mg, 0.408 mmol) were dissolved in dry and degassed tetrahydrofuran (15 mL). The resulting mixture was stirred at room temperature for 24 h under argon. The resulting solution was filtered through Celite, the filtrate was concentrated to ca. 5 mL, and silica gel was added. The solvent was evaporated under reduced pressure, and the coated silica gel was loaded on the top of a silica gel column packed in mixture pentane and dichloromethane (50/50) at 5 °C. The product was eluted with a 75:25 mixture of dichloromethane and pentane (195 mg, 100%).

# Complex **5b**

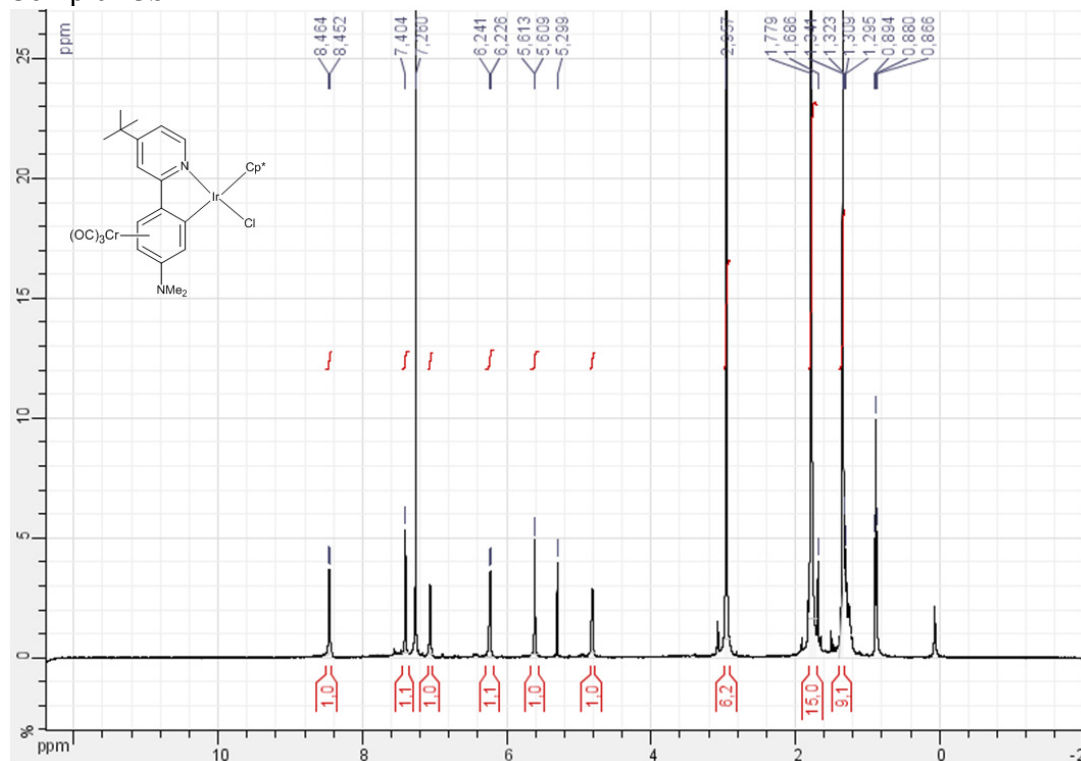

**Figure 14** NMR  $^1\text{H}$  in  $\text{CDCl}_3$

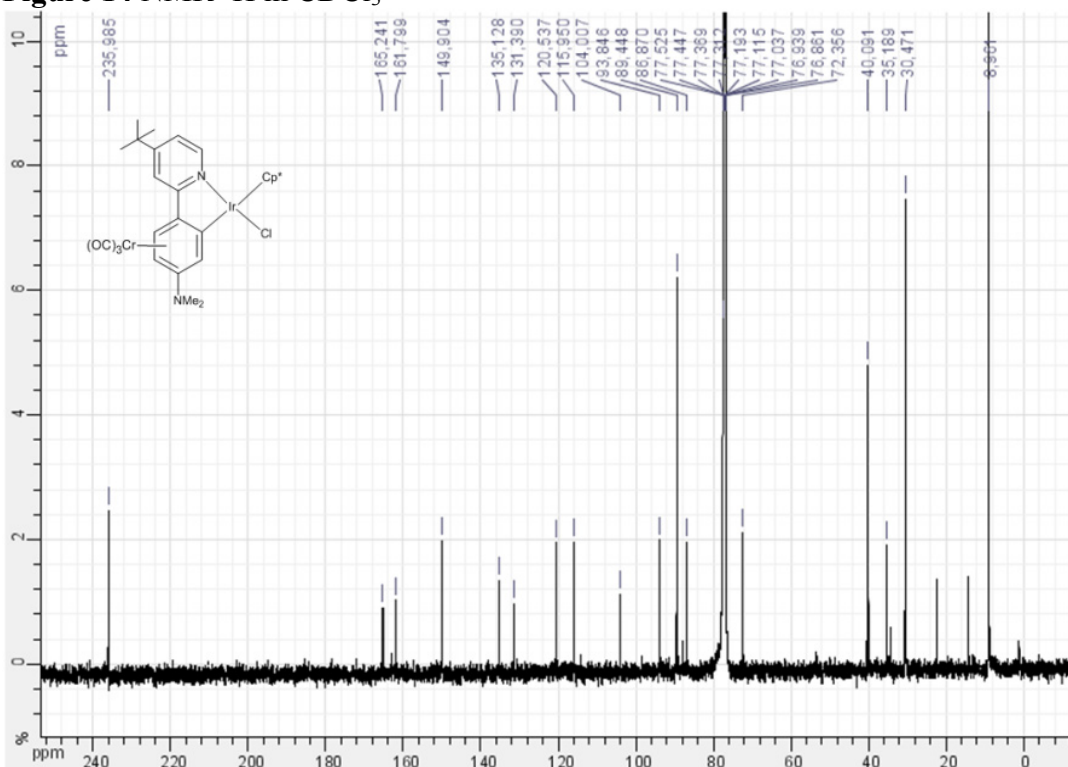

**Figure 15** NMR  $^{13}\text{C}$  in  $\text{CDCl}_3$

A similar procedure was applied for the synthesis of complex **2b**: **1d** (250 mg, 0.639 mmol),  $[\text{Cp}^*\text{IrCl}_2]_2$  (254 mg, 0.319 mmol) and  $\text{NaOAc}\cdot 3\text{H}_2\text{O}$  (209.59 mg, 2.55 mmol) in dichloromethane (15

mL). The yield was 70% (336 mg). Anal. Calcd for  $C_{30}H_{36}ClCrIrN_2O_3 \cdot 0.6CH_2Cl_2$ : C, 45.88; H, 4.888; N, 3.093. Found: C, 45.76; H, 4.67; N, 3.49. (IR)  $\nu$ = 1917, 1829 (C=O).  $^1H$  NMR ( $CDCl_3$ ):  $\delta$  1.34 (s, 9 H, *t*Bu), 1.78 (s, 15 H,  $C_5Me_5$ ), 2.96 (s, 6 H,  $NMe_2$ ), 4.82 (d, 1 H,  $^3J = 7.1$  Hz), 5.61 (d, 1 H,  $^4J = 1.7$  Hz), 6.23 (d, 1 H,  $^3J = 7.2$  Hz), 7.06 (d, 1 H,  $^3J = 5.7$  Hz), 7.4 (s, 1 H), 8.46 (d, 1 H,  $^3J = 6.3$  Hz).  $^{13}C$  NMR ( $CDCl_3$ ):  $\delta$  235.9, 165.2, 161.8, 149.9, 135.1, 131.4, 120.5, 115.9, 104.0, 93.8, 89.4, 86.8, 72.3, 40.1, 35.2, 30.5, 8.9.

**Complex 4a**

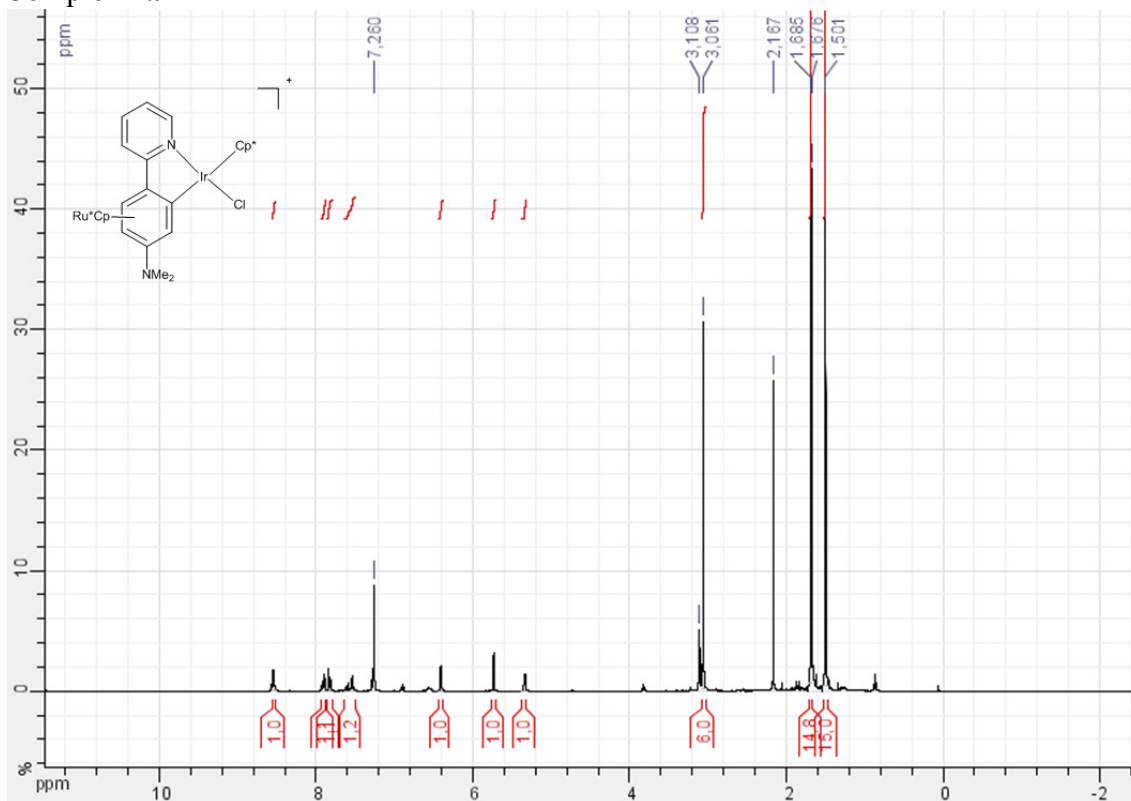

**Figure 16** NMR <sup>1</sup>H in CDCl<sub>3</sub>

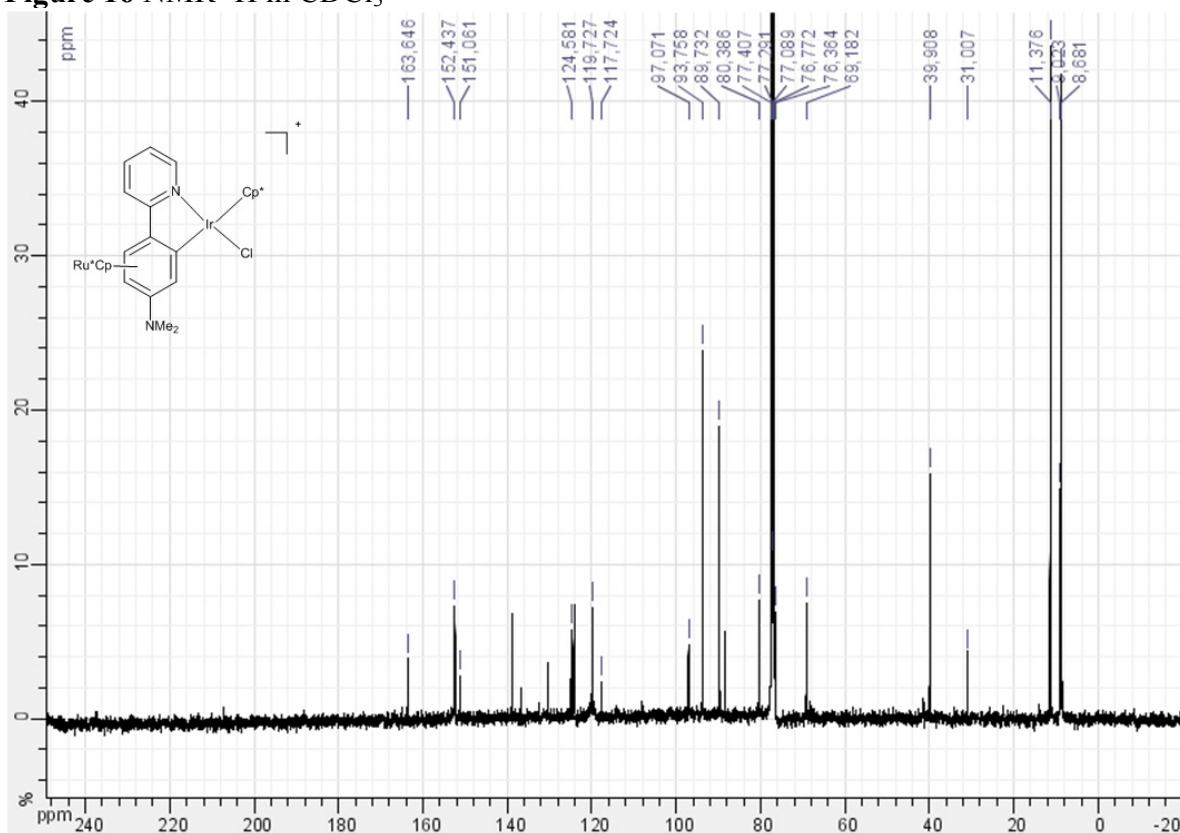

**Figure 17** NMR <sup>13</sup>C in CDCl<sub>3</sub>

A mixture compound **2a** (100 mg, 0.178 mmol) and [Cp\*Ru(NCCH<sub>3</sub>)<sub>3</sub>]PF<sub>6</sub> (90 mg, 0.178 mmol) in THF (10 mL) was stirred at room temperature for 24 h under argon. After a flash filtration of the solution through celite, the filtrate was concentrated and the resulting precipitate recrystallized with pentane. The precipitate was washed 3 times with pentane and finally evaporated to dryness under reduced pressure. The compound **4a** was isolated as a yellow-orange solid with a yield of 75% (127 mg). Anal. Calcd for C<sub>33</sub>H<sub>43</sub>ClF<sub>6</sub>IrN<sub>2</sub>PRu. 2CH<sub>2</sub>Cl<sub>2</sub>. H<sub>2</sub>O: C, 37.29; H, 4.51; N, 2.92. Found: C, 37.22; H, 4.37; N, 2.48. <sup>1</sup>H NMR (CDCl<sub>3</sub>): δ 1.501 (s, 15 H, C<sub>5</sub>Me<sub>5</sub>), 1.685 (s, 15 H, C<sub>5</sub>Me<sub>5</sub>), 3.06 (s, 6 H, NMe<sub>2</sub>), 5.34 (dd, 1 H, <sup>4</sup>J = 1.99, <sup>3</sup>J = 6.38 Hz), 5.73 (d, 1 H, <sup>4</sup>J = 1.9 Hz), 6.41 (d, 1 H, <sup>3</sup>J = 6.5 Hz), 7.26 (m, 1 H, <sup>4</sup>J = 1.4, <sup>3</sup>J = 4.2 Hz), 7.83 (d, 1 H, <sup>3</sup>J = 7.9 Hz), 7.9 (dt, 1 H, <sup>4</sup>J = 1.6, <sup>3</sup>J = 7.7 Hz), 8.54 (d, 1 H, <sup>3</sup>J = 5.5 Hz). <sup>13</sup>C NMR (CDCl<sub>3</sub>): δ 163.6, 152.4, 151.0, 124.6, 119.3, 117.7, 97.1, 93.7, 88.7, 80.4, 69.2, 39.9, 31.0, 11.4, 8.7.

**Ligand 1b**

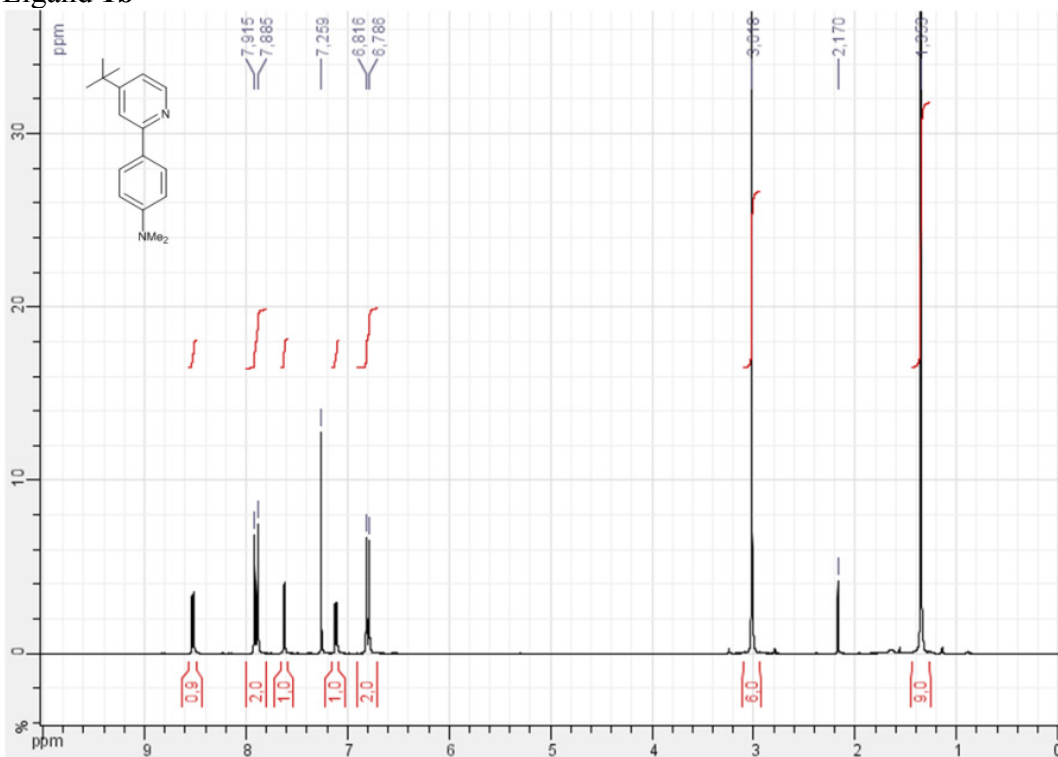

**Figure 18**  $^1\text{H}$  NMR in  $\text{CDCl}_3$

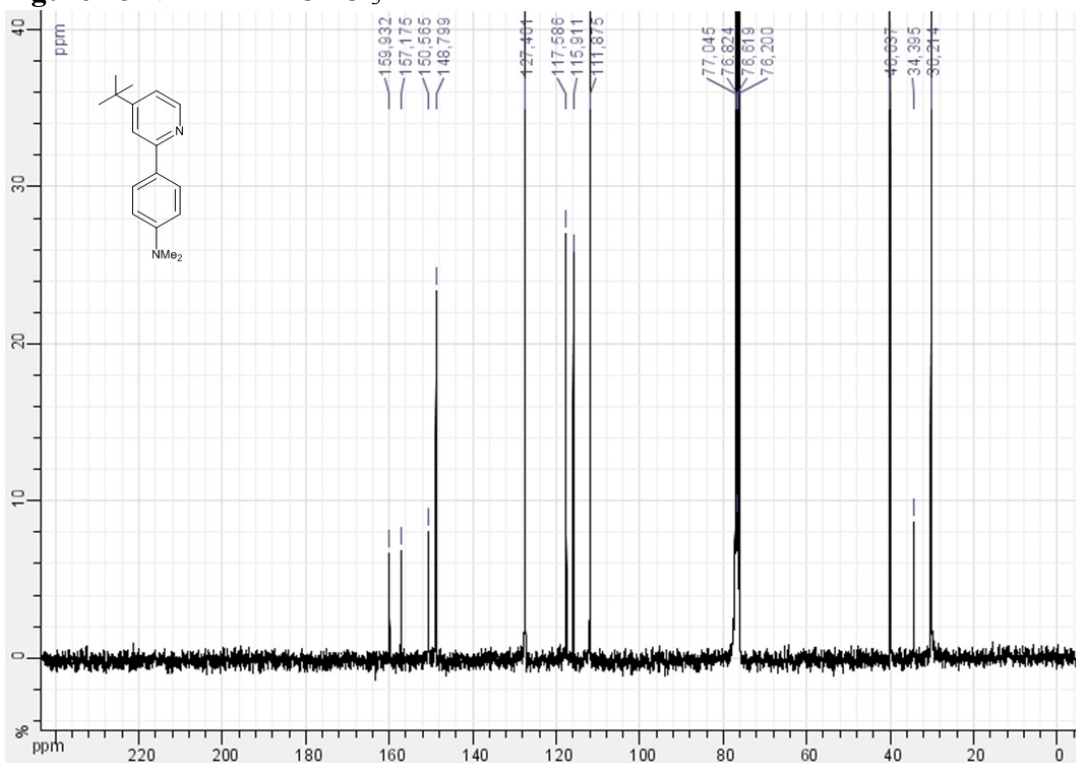

**Figure 19**  $^{13}\text{C}$  NMR in  $\text{CDCl}_3$

A solution of 4-lithio,N,N-dimethylaniline (57.5 mmol, prepared by reaction of 4-bromo,N,N-dimethylaniline with excess Li metal) in diethyl ether (125 mL) was added to pure and dry 4-

*t*butylpyridine (7.75 g, 57.5 mmol) at room temperature and the resulting solution was left to stir for ca. 7 h. The resulting solution evaporated to dryness and the residue suspended in dry cyclohexane (70 mL) and boiled overnight. The resulting suspension was hydrolyzed with water and the mixture extracted dichloromethane following convention workup procedure. The organic phase was dried over  $\text{MgSO}_4$ , filtered through Celite and the filtrate was stripped of solvents. The residue was purified by chromatography through  $\text{SiO}_2$  and eluted with a 30:70 mixture of  $\text{CH}_2\text{Cl}_2$  and *n*-pentane. Pure compound **1b** was recovered as off-white crystals upon concentration of the eluate and crystallization (8.7 g, 60 %).

Anal. Calcd for  $\text{C}_{17}\text{H}_{22}\text{N}_2$ : C, 80.27; H, 8.72; N, 11.02. Found: C, 80.08; H, 8.42; N, 11.00.  $^1\text{H}$  NMR ( $\text{CDCl}_3$ ):  $\delta$  1.35 (s, 9 H, *t*Bu), 3.02 (s, 6 H,  $\text{NMe}_2$ ), 6.80 (d, 2 H,  $^3J = 8.9$  Hz), 7.11 (dd, 1 H,  $^4J = 1.9$ ,  $^3J = 5.3$  Hz), 7.62 (d, 1 H,  $^4J = 2.1$  Hz), 7.90 (d, 2 H,  $^3J = 8.9$  Hz), 8.52 (d, 1 H,  $^3J = 5.3$  Hz).  $^{13}\text{C}$  NMR ( $\text{CDCl}_3$ ):  $\delta$  159.9, 157.2, 150.5, 148.8, 127.4, 117.6, 115.9, 111.8, 40.0, 34.4, 30.2.

## Dependence of the $^1\text{H}$ NMR spectrum of endo-3a on the nature of the counter anion.

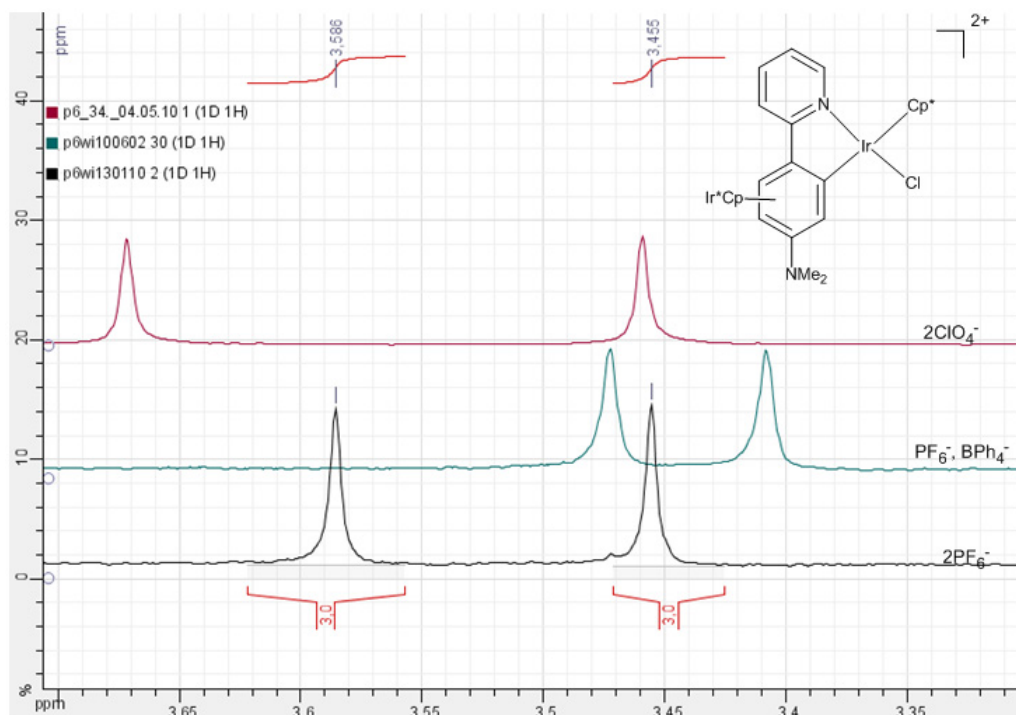

Figure 20:  $^1\text{H}$  signals of the  $\text{NMe}_2$  group in the presence of different anions

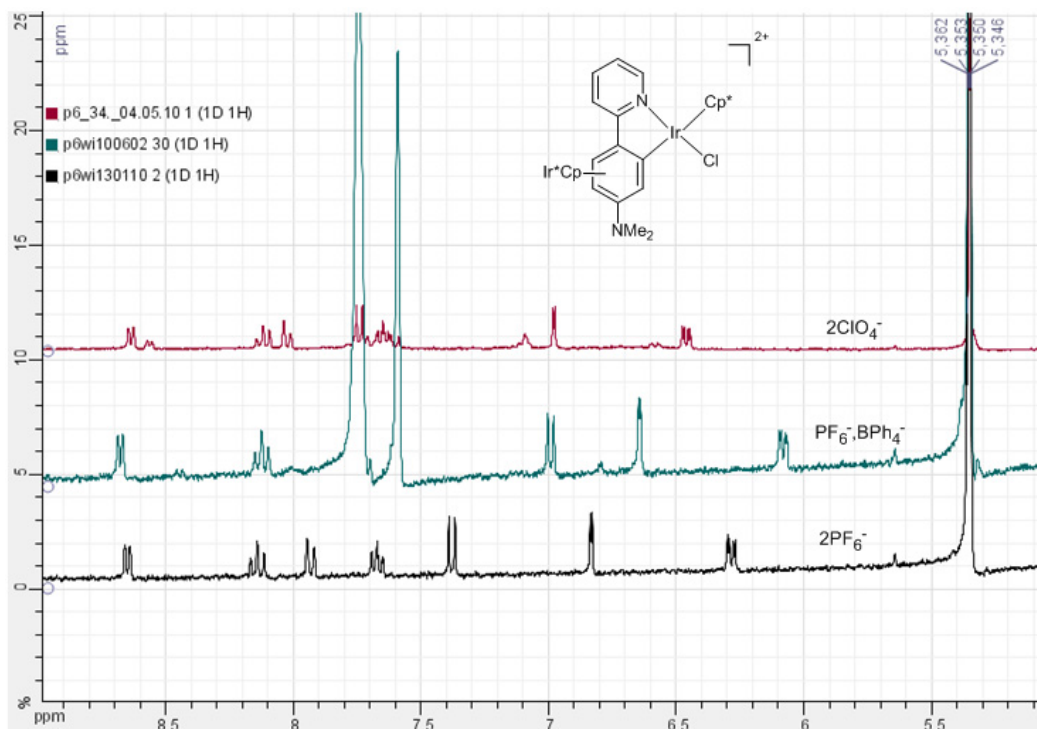

Figure 2:  $^1\text{H}$  NMR signals in the aromatic region in the presence of different anions

## Variable Temperature $^1\text{H}$ NMR experiments

Line shape analysis of the rotation of the  $-\text{NMe}_2$  group in compound  $[\text{endo-3a}][\text{PF}_6]_2$  in deuterated acetone<sup>1, 2</sup>

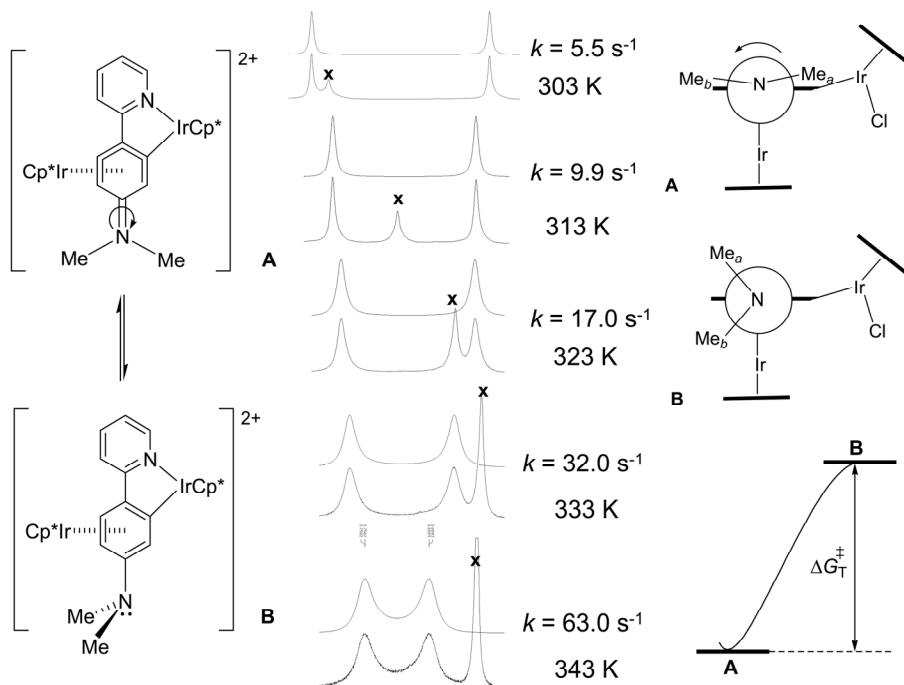

**Figure 21** Experimental and simulated portions of the  $^1\text{H}$  NMR spectrum of a 15 mM solution of  $[\text{endo-3a}][\text{PF}_6]_2$ .

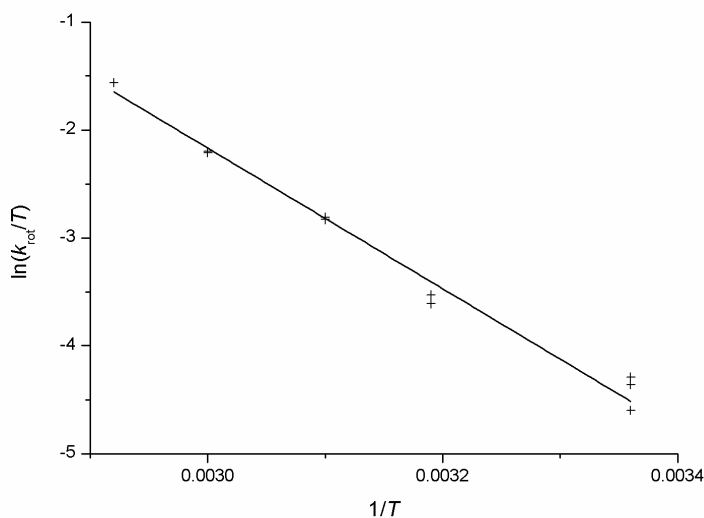

**Figure 22** Eyring plot of  $\ln(k_{\text{rot}}/T) = f(1/T)$ . The data of three independent VT experiments carried out with solutions of different ionic strength have been merged here since no major difference in  $k_{\text{rot}}$  for each temperature was noticed. Variable-temperature (VT)  $^1\text{H}$  NMR experiments were carried out with 9.3 mM solutions of  $[\text{endo-3a}][\text{PF}_6]_2$  in  $d_6$ -acetone.

|   | Intercept<br>Value | Intercept<br>Error | Slope<br>Value | Slope<br>Error | Statistics<br>Adj. R <sup>2</sup> |
|---|--------------------|--------------------|----------------|----------------|-----------------------------------|
| I | 17.38001           | 0.62043            | -6516.16576    | 198.99825      | 0.9871                            |

$$\ln(k_{\text{rot}}/T) - \ln[\kappa(k_{\text{B}} / h)] = \Delta S_{\text{rot}}/R - \Delta H_{\text{rot}}/RT, \text{ with } \kappa = 1$$

## Crystallographic data

**2a**

**3a**

**4a**

**5b**

2a

### Crystal data

|                                                      |                                                                            |
|------------------------------------------------------|----------------------------------------------------------------------------|
| <u>C<sub>23</sub>H<sub>28</sub>ClIrN<sub>2</sub></u> |                                                                            |
| <u>M<sub>r</sub> = 560.12</u>                        | <u>D<sub>x</sub> = 1.833 Mg m<sup>-3</sup></u>                             |
| <u>Monoclinic, P2<sub>1</sub>/c</u>                  |                                                                            |
| Hall symbol: <u>-P 2ybc</u>                          | <u>Mo K<math>\alpha</math> radiation, <math>\lambda</math> = 0.71073 Å</u> |
| <u>a = 16.5371 (6) Å</u>                             | Cell parameters from <u>9910</u> reflections                               |
| <u>b = 7.5131 (3) Å</u>                              | $\theta$ = <u>3.0–32.1°</u>                                                |
| <u>c = 20.9885 (6) Å</u>                             | $\mu$ = <u>6.72 mm<sup>-1</sup></u>                                        |
| $\beta$ = <u>128.903 (2)°</u>                        | <u>T = 173 K</u>                                                           |
| <u>V = 2029.35 (12) Å<sup>3</sup></u>                | <u>Block, yellow</u>                                                       |
| <u>Z = 4</u>                                         | <u>0.38 × 0.30 × 0.20 mm</u>                                               |
| <u>F(000) = 1096</u>                                 |                                                                            |

### Data collection

|                                                         |                                                                |
|---------------------------------------------------------|----------------------------------------------------------------|
| <u>Bruker APEX-II CCD diffractometer</u>                | <u>7014 independent reflections</u>                            |
| Radiation source: <u>fine-focus sealed tube</u>         | <u>6324 reflections with <math>I &gt; 2\sigma(I)</math></u>    |
| <u>graphite</u>                                         | <u>R<sub>int</sub> = 0.017</u>                                 |
| Detector resolution: <u>?</u> pixels mm <sup>-1</sup>   | $\theta_{\max}$ = <u>32.1°</u> , $\theta_{\min}$ = <u>3.0°</u> |
| <u><math>\phi</math> and <math>\omega</math> scans</u>  | <u>h = -24 20</u>                                              |
| Absorption correction: <u>multi-scan sadabs</u>         | <u>k = -10 11</u>                                              |
| <u>T<sub>min</sub> = 0.184, T<sub>max</sub> = 0.347</u> | <u>l = -30 31</u>                                              |
| <u>20707 measured reflections</u>                       |                                                                |

### Refinement

|                                    |                                                         |
|------------------------------------|---------------------------------------------------------|
| Refinement on <u>F<sup>2</sup></u> | Secondary atom site location: <u>difference Fourier</u> |
|------------------------------------|---------------------------------------------------------|

|                                                                       |                                                                                                       |
|-----------------------------------------------------------------------|-------------------------------------------------------------------------------------------------------|
|                                                                       | <u>map</u>                                                                                            |
| Least-squares matrix: <u>full</u>                                     | Hydrogen site location: <u>inferred from neighbouring sites</u>                                       |
| $R[F^2 > 2\sigma(F^2)] = \underline{0.023}$                           | <u>H-atom parameters constrained</u>                                                                  |
| $wR(F^2) = \underline{0.052}$                                         | $w = 1/[\sigma^2(F_o^2) + (0.0166P)^2 + 4.1026P]$<br><u>where <math>P = (F_o^2 + 2F_c^2)/3</math></u> |
| $S = \underline{1.14}$                                                | $(\Delta/\sigma)_{\max} = \underline{0.003}$                                                          |
| <u>7014</u> reflections                                               | $\Delta\rho_{\max} = \underline{2.90} \text{ e } \text{\AA}^{-3}$                                     |
| <u>251</u> parameters                                                 | $\Delta\rho_{\min} = \underline{-1.45} \text{ e } \text{\AA}^{-3}$                                    |
| <u>0</u> restraints                                                   | Extinction correction: <u>none</u>                                                                    |
| <u>?</u> constraints                                                  | Extinction coefficient: <u>?</u>                                                                      |
| Primary atom site location: <u>structure-invariant direct methods</u> |                                                                                                       |

Refinement of  $F^2$  against ALL reflections. The weighted  $R$ -factor  $wR$  and goodness of fit  $S$  are based on  $F^2$ , conventional  $R$ -factors  $R$  are based on  $F$ , with  $F$  set to zero for negative  $F^2$ . The threshold expression of  $F^2 > 2\sigma(F^2)$  is used only for calculating  $R$ -factors(gt) *etc.* and is not relevant to the choice of reflections for refinement.  $R$ -factors based on  $F^2$  are statistically about twice as large as those based on  $F$ , and  $R$ -factors based on ALL data will be even larger.

Fractional atomic coordinates and isotropic or equivalent isotropic displacement parameters ( $\text{\AA}^2$ )

|     | $x$           | $y$            | $z$           | $U_{\text{iso}}^*/U_{\text{eq}}$ |
|-----|---------------|----------------|---------------|----------------------------------|
| Ir1 | -0.267470 (6) | -0.258435 (10) | -0.998843 (5) | 0.01386 (3)                      |
| Cl1 | -0.32964 (5)  | -0.54194 (8)   | -1.06777 (4)  | 0.02188 (11)                     |
| N1  | -0.29354 (16) | -0.3639 (3)    | -0.92061 (13) | 0.0166 (4)                       |
| N2  | 0.13504 (18)  | -0.4641 (4)    | -0.84389 (16) | 0.0290 (5)                       |
| C1  | -0.12850 (18) | -0.3758 (3)    | -0.91031 (14) | 0.0150 (4)                       |
| C2  | -0.04238 (19) | -0.3782 (3)    | -0.90755 (15) | 0.0181 (4)                       |
| H2  | -0.0467       | -0.3205        | -0.9499       | 0.022*                           |
| C3  | 0.05145 (19)  | -0.4634 (3)    | -0.84412 (15) | 0.0198 (4)                       |
| C4  | 0.0559 (2)    | -0.5514 (3)    | -0.78263 (16) | 0.0227 (5)                       |
| H4  | 0.1179        | -0.6103        | -0.7394       | 0.027*                           |
| C5  | -0.0293 (2)   | -0.5524 (3)    | -0.78481 (15) | 0.0207 (5)                       |

|      |               |             |               |            |
|------|---------------|-------------|---------------|------------|
| H5   | -0.0257       | -0.6139     | -0.7435       | 0.025*     |
| C6   | -0.12093 (18) | -0.4639 (3) | -0.84718 (14) | 0.0158 (4) |
| C7   | -0.21354 (19) | -0.4569 (3) | -0.85414 (14) | 0.0170 (4) |
| C8   | -0.2266 (2)   | -0.5366 (3) | -0.80067 (16) | 0.0229 (5) |
| H8   | -0.1706       | -0.5990     | -0.7537       | 0.027*     |
| C9   | -0.3209 (2)   | -0.5245 (4) | -0.81630 (17) | 0.0270 (5) |
| H9   | -0.3301       | -0.5788     | -0.7804       | 0.032*     |
| C10  | -0.4024 (2)   | -0.4322 (4) | -0.88505 (18) | 0.0268 (5) |
| H10  | -0.4680       | -0.4227     | -0.8971       | 0.032*     |
| C11  | -0.3852 (2)   | -0.3550 (4) | -0.93532 (17) | 0.0228 (5) |
| H11  | -0.4408       | -0.2926     | -0.9825       | 0.027*     |
| C12  | 0.2370 (2)    | -0.5113 (5) | -0.76996 (19) | 0.0338 (7) |
| H12A | 0.2564        | -0.4307     | -0.7256       | 0.051*     |
| H12B | 0.2878        | -0.5011     | -0.7794       | 0.051*     |
| H12C | 0.2359        | -0.6340     | -0.7547       | 0.051*     |
| C13  | 0.1321 (2)    | -0.3572 (5) | -0.9026 (2)   | 0.0342 (7) |
| H13A | 0.0746        | -0.3968     | -0.9581       | 0.051*     |
| H13B | 0.1978        | -0.3702     | -0.8932       | 0.051*     |
| H13C | 0.1219        | -0.2319     | -0.8962       | 0.051*     |
| C14  | -0.2426 (2)   | -0.0894 (3) | -1.06843 (14) | 0.0182 (4) |
| C15  | -0.20860 (19) | 0.0023 (3)  | -0.99487 (14) | 0.0165 (4) |
| C16  | -0.2977 (2)   | 0.0214 (3)  | -0.99808 (15) | 0.0177 (4) |
| C17  | -0.3885 (2)   | -0.0456 (3) | -1.07653 (16) | 0.0209 (5) |
| C18  | -0.3538 (2)   | -0.1134 (3) | -1.11821 (15) | 0.0202 (4) |
| C19  | -0.1779 (2)   | -0.1286 (4) | -1.09422 (18) | 0.0267 (5) |
| H19A | -0.2017       | -0.0550     | -1.1417       | 0.040*     |
| H19B | -0.1848       | -0.2547     | -1.1089       | 0.040*     |
| H19C | -0.1049       | -0.1017     | -1.0490       | 0.040*     |

|      |             |             |               |            |
|------|-------------|-------------|---------------|------------|
| C20  | -0.1043 (2) | 0.0796 (4)  | -0.93120 (16) | 0.0246 (5) |
| H20A | -0.1026     | 0.2028      | -0.9456       | 0.037*     |
| H20B | -0.0516     | 0.0096      | -0.9277       | 0.037*     |
| H20C | -0.0897     | 0.0773      | -0.8782       | 0.037*     |
| C21  | -0.3000 (2) | 0.1134 (4)  | -0.93623 (18) | 0.0258 (5) |
| H21A | -0.2293     | 0.1211      | -0.8841       | 0.039*     |
| H21B | -0.3438     | 0.0460      | -0.9283       | 0.039*     |
| H21C | -0.3284     | 0.2336      | -0.9556       | 0.039*     |
| C22  | -0.4982 (2) | -0.0315 (4) | -1.1086 (2)   | 0.0337 (7) |
| H22A | -0.5303     | 0.0749      | -1.1430       | 0.050*     |
| H22B | -0.4995     | -0.0228     | -1.0627       | 0.050*     |
| H22C | -0.5369     | -0.1373     | -1.1412       | 0.050*     |
| C23  | -0.4212 (3) | -0.1961 (4) | -1.20203 (17) | 0.0325 (6) |
| H23A | -0.4681     | -0.2830     | -1.2055       | 0.049*     |
| H23B | -0.3774     | -0.2560     | -1.2119       | 0.049*     |
| H23C | -0.4623     | -0.1031     | -1.2433       | 0.049*     |

Atomic displacement parameters ( $\text{\AA}^2$ )

|     | $U^{11}$    | $U^{22}$    | $U^{33}$    | $U^{12}$    | $U^{13}$    | $U^{23}$    |
|-----|-------------|-------------|-------------|-------------|-------------|-------------|
| Ir1 | 0.01495 (4) | 0.01173 (4) | 0.01424 (4) | 0.00102 (3) | 0.00886 (3) | 0.00074 (3) |
| Cl1 | 0.0270 (3)  | 0.0162 (2)  | 0.0246 (3)  | -0.0030 (2) | 0.0172 (2)  | -0.0042 (2) |
| N1  | 0.0184 (9)  | 0.0156 (8)  | 0.0198 (9)  | -0.0009 (7) | 0.0139 (8)  | -0.0007 (7) |
| N2  | 0.0181 (10) | 0.0367 (13) | 0.0314 (12) | 0.0064 (9)  | 0.0151 (10) | 0.0041 (10) |
| C1  | 0.0172 (10) | 0.0113 (9)  | 0.0160 (9)  | -0.0001 (7) | 0.0102 (8)  | 0.0005 (7)  |
| C2  | 0.0193 (10) | 0.0168 (10) | 0.0199 (10) | 0.0033 (8)  | 0.0132 (9)  | 0.0032 (8)  |
| C3  | 0.0161 (10) | 0.0182 (10) | 0.0214 (11) | 0.0015 (8)  | 0.0100 (9)  | -0.0012 (8) |
| C4  | 0.0195 (11) | 0.0208 (11) | 0.0189 (11) | 0.0047 (9)  | 0.0078 (9)  | 0.0032 (9)  |
| C5  | 0.0238 (11) | 0.0183 (10) | 0.0163 (10) | 0.0007 (9)  | 0.0107 (9)  | 0.0025 (8)  |

|     |             |             |             |              |             |              |
|-----|-------------|-------------|-------------|--------------|-------------|--------------|
| C6  | 0.0184 (10) | 0.0129 (9)  | 0.0151 (9)  | −0.0008 (7)  | 0.0101 (8)  | −0.0005 (7)  |
| C7  | 0.0224 (11) | 0.0133 (9)  | 0.0176 (10) | −0.0033 (8)  | 0.0136 (9)  | −0.0030 (7)  |
| C8  | 0.0306 (13) | 0.0215 (11) | 0.0203 (11) | −0.0041 (10) | 0.0178 (10) | −0.0013 (9)  |
| C9  | 0.0374 (15) | 0.0276 (13) | 0.0275 (13) | −0.0106 (11) | 0.0260 (12) | −0.0069 (10) |
| C10 | 0.0294 (13) | 0.0284 (13) | 0.0344 (14) | −0.0068 (10) | 0.0257 (12) | −0.0079 (11) |
| C11 | 0.0229 (12) | 0.0233 (11) | 0.0281 (12) | −0.0018 (9)  | 0.0189 (11) | −0.0031 (9)  |
| C12 | 0.0184 (12) | 0.0434 (17) | 0.0301 (14) | 0.0049 (12)  | 0.0106 (11) | −0.0067 (13) |
| C13 | 0.0284 (14) | 0.0371 (16) | 0.0467 (18) | 0.0003 (12)  | 0.0282 (14) | 0.0014 (13)  |
| C14 | 0.0259 (11) | 0.0154 (10) | 0.0172 (10) | 0.0019 (8)   | 0.0154 (9)  | 0.0037 (8)   |
| C15 | 0.0221 (11) | 0.0117 (9)  | 0.0161 (9)  | −0.0006 (8)  | 0.0122 (9)  | 0.0005 (7)   |
| C16 | 0.0238 (11) | 0.0112 (9)  | 0.0201 (10) | 0.0037 (8)   | 0.0148 (9)  | 0.0024 (8)   |
| C17 | 0.0199 (11) | 0.0165 (10) | 0.0216 (11) | 0.0043 (8)   | 0.0107 (9)  | 0.0028 (8)   |
| C18 | 0.0234 (11) | 0.0168 (10) | 0.0164 (10) | 0.0038 (8)   | 0.0105 (9)  | 0.0038 (8)   |
| C19 | 0.0363 (15) | 0.0265 (13) | 0.0291 (13) | 0.0021 (11)  | 0.0262 (12) | 0.0021 (10)  |
| C20 | 0.0276 (13) | 0.0208 (11) | 0.0225 (11) | −0.0064 (10) | 0.0144 (10) | −0.0025 (9)  |
| C21 | 0.0367 (15) | 0.0201 (11) | 0.0306 (13) | 0.0032 (10)  | 0.0259 (12) | −0.0013 (10) |
| C22 | 0.0211 (13) | 0.0325 (15) | 0.0390 (16) | 0.0088 (11)  | 0.0148 (12) | 0.0057 (12)  |
| C23 | 0.0354 (15) | 0.0303 (14) | 0.0168 (11) | 0.0020 (12)  | 0.0091 (11) | −0.0014 (10) |

Geometric parameters (Å, °)

|         |            |          |           |
|---------|------------|----------|-----------|
| Ir1—C1  | 2.037 (2)  | C12—H12A | 0.9800    |
| Ir1—N1  | 2.097 (2)  | C12—H12B | 0.9800    |
| Ir1—C14 | 2.161 (2)  | C12—H12C | 0.9800    |
| Ir1—C16 | 2.163 (2)  | C13—H13A | 0.9800    |
| Ir1—C15 | 2.166 (2)  | C13—H13B | 0.9800    |
| Ir1—C18 | 2.238 (2)  | C13—H13C | 0.9800    |
| Ir1—C17 | 2.263 (2)  | C14—C15  | 1.443 (3) |
| Ir1—Cl1 | 2.4122 (6) | C14—C18  | 1.446 (4) |

|             |            |               |           |
|-------------|------------|---------------|-----------|
| N1—C11      | 1.346 (3)  | C14—C19       | 1.501 (4) |
| N1—C7       | 1.366 (3)  | C15—C16       | 1.440 (3) |
| N2—C3       | 1.379 (3)  | C15—C20       | 1.484 (4) |
| N2—C13      | 1.446 (4)  | C16—C17       | 1.454 (4) |
| N2—C12      | 1.446 (4)  | C16—C21       | 1.492 (3) |
| C1—C2       | 1.389 (3)  | C17—C18       | 1.409 (4) |
| C1—C6       | 1.415 (3)  | C17—C22       | 1.491 (4) |
| C2—C3       | 1.413 (3)  | C18—C23       | 1.503 (4) |
| C2—H2       | 0.9500     | C19—H19A      | 0.9800    |
| C3—C4       | 1.410 (4)  | C19—H19B      | 0.9800    |
| C4—C5       | 1.380 (4)  | C19—H19C      | 0.9800    |
| C4—H4       | 0.9500     | C20—H20A      | 0.9800    |
| C5—C6       | 1.400 (3)  | C20—H20B      | 0.9800    |
| C5—H5       | 0.9500     | C20—H20C      | 0.9800    |
| C6—C7       | 1.445 (3)  | C21—H21A      | 0.9800    |
| C7—C8       | 1.404 (3)  | C21—H21B      | 0.9800    |
| C8—C9       | 1.379 (4)  | C21—H21C      | 0.9800    |
| C8—H8       | 0.9500     | C22—H22A      | 0.9800    |
| C9—C10      | 1.392 (4)  | C22—H22B      | 0.9800    |
| C9—H9       | 0.9500     | C22—H22C      | 0.9800    |
| C10—C11     | 1.380 (4)  | C23—H23A      | 0.9800    |
| C10—H10     | 0.9500     | C23—H23B      | 0.9800    |
| C11—H11     | 0.9500     | C23—H23C      | 0.9800    |
| C1—Irl—N1   | 77.94 (9)  | N2—C12—H12C   | 109.5     |
| C1—Irl—C14  | 106.65 (9) | H12A—C12—H12C | 109.5     |
| N1—Irl—C14  | 166.19 (9) | H12B—C12—H12C | 109.5     |
| C1—Irl—C16  | 123.20 (9) | N2—C13—H13A   | 109.5     |
| N1—Irl—C16  | 101.49 (9) | N2—C13—H13B   | 109.5     |
| C14—Irl—C16 | 64.96 (9)  | H13A—C13—H13B | 109.5     |

|             |             |               |             |
|-------------|-------------|---------------|-------------|
| C1—Ir1—C15  | 97.70 (9)   | N2—C13—H13C   | 109.5       |
| N1—Ir1—C15  | 128.32 (8)  | H13A—C13—H13C | 109.5       |
| C14—Ir1—C15 | 38.97 (9)   | H13B—C13—H13C | 109.5       |
| C16—Ir1—C15 | 38.85 (9)   | C15—C14—C18   | 107.3 (2)   |
| C1—Ir1—C18  | 142.46 (9)  | C15—C14—C19   | 126.3 (2)   |
| N1—Ir1—C18  | 139.48 (9)  | C18—C14—C19   | 125.8 (2)   |
| C14—Ir1—C18 | 38.33 (9)   | C15—C14—Ir1   | 70.70 (13)  |
| C16—Ir1—C18 | 63.09 (9)   | C18—C14—Ir1   | 73.73 (14)  |
| C15—Ir1—C18 | 63.77 (9)   | C19—C14—Ir1   | 127.56 (18) |
| C1—Ir1—C17  | 160.69 (10) | C16—C15—C14   | 107.3 (2)   |
| N1—Ir1—C17  | 107.92 (9)  | C16—C15—C20   | 125.5 (2)   |
| C14—Ir1—C17 | 63.57 (10)  | C14—C15—C20   | 127.0 (2)   |
| C16—Ir1—C17 | 38.26 (9)   | C16—C15—Ir1   | 70.48 (13)  |
| C15—Ir1—C17 | 63.98 (9)   | C14—C15—Ir1   | 70.33 (13)  |
| C18—Ir1—C17 | 36.47 (9)   | C20—C15—Ir1   | 128.94 (17) |
| C1—Ir1—C11  | 88.67 (7)   | C15—C16—C17   | 108.5 (2)   |
| N1—Ir1—C11  | 85.19 (6)   | C15—C16—C21   | 126.1 (2)   |
| C14—Ir1—C11 | 107.70 (7)  | C17—C16—C21   | 125.0 (2)   |
| C16—Ir1—C11 | 148.11 (7)  | C15—C16—Ir1   | 70.67 (13)  |
| C15—Ir1—C11 | 146.49 (6)  | C17—C16—Ir1   | 74.58 (13)  |
| C18—Ir1—C11 | 91.51 (7)   | C21—C16—Ir1   | 126.10 (17) |
| C17—Ir1—C11 | 109.92 (7)  | C18—C17—C16   | 107.2 (2)   |
| C11—N1—C7   | 119.2 (2)   | C18—C17—C22   | 126.9 (3)   |
| C11—N1—Ir1  | 123.89 (18) | C16—C17—C22   | 125.8 (2)   |
| C7—N1—Ir1   | 116.71 (16) | C18—C17—Ir1   | 70.82 (14)  |
| C3—N2—C13   | 119.8 (2)   | C16—C17—Ir1   | 67.16 (13)  |
| C3—N2—C12   | 119.7 (3)   | C22—C17—Ir1   | 130.6 (2)   |
| C13—N2—C12  | 116.3 (3)   | C17—C18—C14   | 109.5 (2)   |
| C2—C1—C6    | 118.0 (2)   | C17—C18—C23   | 125.7 (3)   |

|             |             |               |             |
|-------------|-------------|---------------|-------------|
| C2—C1—Ir1   | 125.72 (17) | C14—C18—C23   | 124.7 (2)   |
| C6—C1—Ir1   | 116.28 (17) | C17—C18—Ir1   | 72.71 (14)  |
| C1—C2—C3    | 122.4 (2)   | C14—C18—Ir1   | 67.94 (13)  |
| C1—C2—H2    | 118.8       | C23—C18—Ir1   | 126.29 (19) |
| C3—C2—H2    | 118.8       | C14—C19—H19A  | 109.5       |
| N2—C3—C4    | 121.3 (2)   | C14—C19—H19B  | 109.5       |
| N2—C3—C2    | 120.7 (2)   | H19A—C19—H19B | 109.5       |
| C4—C3—C2    | 118.0 (2)   | C14—C19—H19C  | 109.5       |
| C5—C4—C3    | 120.5 (2)   | H19A—C19—H19C | 109.5       |
| C5—C4—H4    | 119.8       | H19B—C19—H19C | 109.5       |
| C3—C4—H4    | 119.8       | C15—C20—H20A  | 109.5       |
| C4—C5—C6    | 120.7 (2)   | C15—C20—H20B  | 109.5       |
| C4—C5—H5    | 119.6       | H20A—C20—H20B | 109.5       |
| C6—C5—H5    | 119.6       | C15—C20—H20C  | 109.5       |
| C5—C6—C1    | 120.3 (2)   | H20A—C20—H20C | 109.5       |
| C5—C6—C7    | 124.6 (2)   | H20B—C20—H20C | 109.5       |
| C1—C6—C7    | 115.0 (2)   | C16—C21—H21A  | 109.5       |
| N1—C7—C8    | 119.9 (2)   | C16—C21—H21B  | 109.5       |
| N1—C7—C6    | 114.0 (2)   | H21A—C21—H21B | 109.5       |
| C8—C7—C6    | 126.1 (2)   | C16—C21—H21C  | 109.5       |
| C9—C8—C7    | 120.0 (3)   | H21A—C21—H21C | 109.5       |
| C9—C8—H8    | 120.0       | H21B—C21—H21C | 109.5       |
| C7—C8—H8    | 120.0       | C17—C22—H22A  | 109.5       |
| C8—C9—C10   | 119.6 (2)   | C17—C22—H22B  | 109.5       |
| C8—C9—H9    | 120.2       | H22A—C22—H22B | 109.5       |
| C10—C9—H9   | 120.2       | C17—C22—H22C  | 109.5       |
| C11—C10—C9  | 118.1 (3)   | H22A—C22—H22C | 109.5       |
| C11—C10—H10 | 120.9       | H22B—C22—H22C | 109.5       |
| C9—C10—H10  | 120.9       | C18—C23—H23A  | 109.5       |

|                |              |                 |              |
|----------------|--------------|-----------------|--------------|
| N1—C11—C10     | 123.1 (3)    | C18—C23—H23B    | 109.5        |
| N1—C11—H11     | 118.4        | H23A—C23—H23B   | 109.5        |
| C10—C11—H11    | 118.4        | C18—C23—H23C    | 109.5        |
| N2—C12—H12A    | 109.5        | H23A—C23—H23C   | 109.5        |
| N2—C12—H12B    | 109.5        | H23B—C23—H23C   | 109.5        |
| H12A—C12—H12B  | 109.5        |                 |              |
| C1—Ir1—N1—C11  | -176.8 (2)   | Cl1—Ir1—C15—C14 | 7.7 (2)      |
| C14—Ir1—N1—C11 | 72.2 (4)     | C1—Ir1—C15—C20  | -15.2 (2)    |
| C16—Ir1—N1—C11 | 61.3 (2)     | N1—Ir1—C15—C20  | 65.5 (3)     |
| C15—Ir1—N1—C11 | 92.9 (2)     | C14—Ir1—C15—C20 | -122.2 (3)   |
| C18—Ir1—N1—C11 | -0.4 (3)     | C16—Ir1—C15—C20 | 120.3 (3)    |
| C17—Ir1—N1—C11 | 22.3 (2)     | C18—Ir1—C15—C20 | -160.8 (3)   |
| Cl1—Ir1—N1—C11 | -87.14 (19)  | C17—Ir1—C15—C20 | 158.4 (3)    |
| C1—Ir1—N1—C7   | -1.37 (17)   | Cl1—Ir1—C15—C20 | -114.5 (2)   |
| C14—Ir1—N1—C7  | -112.4 (4)   | C14—C15—C16—C17 | -4.5 (3)     |
| C16—Ir1—N1—C7  | -123.23 (17) | C20—C15—C16—C17 | 170.0 (2)    |
| C15—Ir1—N1—C7  | -91.70 (19)  | Ir1—C15—C16—C17 | -65.53 (16)  |
| C18—Ir1—N1—C7  | 174.99 (16)  | C14—C15—C16—C21 | -177.9 (2)   |
| C17—Ir1—N1—C7  | -162.30 (16) | C20—C15—C16—C21 | -3.4 (4)     |
| Cl1—Ir1—N1—C7  | 88.30 (16)   | Ir1—C15—C16—C21 | 121.1 (2)    |
| N1—Ir1—C1—C2   | -179.9 (2)   | C14—C15—C16—Ir1 | 61.02 (15)   |
| C14—Ir1—C1—C2  | -13.4 (2)    | C20—C15—C16—Ir1 | -124.5 (2)   |
| C16—Ir1—C1—C2  | -84.0 (2)    | C1—Ir1—C16—C15  | 56.14 (17)   |
| C15—Ir1—C1—C2  | -52.3 (2)    | N1—Ir1—C16—C15  | 139.15 (13)  |
| C18—Ir1—C1—C2  | 4.0 (3)      | C14—Ir1—C16—C15 | -38.01 (13)  |
| C17—Ir1—C1—C2  | -69.9 (4)    | C18—Ir1—C16—C15 | -80.80 (15)  |
| Cl1—Ir1—C1—C2  | 94.7 (2)     | C17—Ir1—C16—C15 | -116.4 (2)   |
| N1—Ir1—C1—C6   | 0.98 (16)    | Cl1—Ir1—C16—C15 | -121.37 (14) |

|               |              |                 |              |
|---------------|--------------|-----------------|--------------|
| C14—Ir1—C1—C6 | 167.52 (17)  | C1—Ir1—C16—C17  | 172.56 (14)  |
| C16—Ir1—C1—C6 | 96.93 (18)   | N1—Ir1—C16—C17  | -104.43 (15) |
| C15—Ir1—C1—C6 | 128.64 (17)  | C14—Ir1—C16—C17 | 78.41 (16)   |
| C18—Ir1—C1—C6 | -175.14 (16) | C15—Ir1—C16—C17 | 116.4 (2)    |
| C17—Ir1—C1—C6 | 111.0 (3)    | C18—Ir1—C16—C17 | 35.63 (15)   |
| Cl1—Ir1—C1—C6 | -84.39 (17)  | Cl1—Ir1—C16—C17 | -5.0 (2)     |
| C6—C1—C2—C3   | -0.6 (3)     | C1—Ir1—C16—C21  | -65.0 (3)    |
| Ir1—C1—C2—C3  | -179.67 (18) | N1—Ir1—C16—C21  | 18.0 (2)     |
| C13—N2—C3—C4  | -173.4 (3)   | C14—Ir1—C16—C21 | -159.2 (3)   |
| C12—N2—C3—C4  | -17.1 (4)    | C15—Ir1—C16—C21 | -121.2 (3)   |
| C13—N2—C3—C2  | 8.4 (4)      | C18—Ir1—C16—C21 | 158.0 (3)    |
| C12—N2—C3—C2  | 164.6 (3)    | C17—Ir1—C16—C21 | 122.4 (3)    |
| C1—C2—C3—N2   | 179.5 (2)    | Cl1—Ir1—C16—C21 | 117.5 (2)    |
| C1—C2—C3—C4   | 1.2 (4)      | C15—C16—C17—C18 | 3.2 (3)      |
| N2—C3—C4—C5   | -178.6 (2)   | C21—C16—C17—C18 | 176.7 (2)    |
| C2—C3—C4—C5   | -0.3 (4)     | Ir1—C16—C17—C18 | -59.77 (17)  |
| C3—C4—C5—C6   | -1.1 (4)     | C15—C16—C17—C22 | -172.5 (2)   |
| C4—C5—C6—C1   | 1.7 (4)      | C21—C16—C17—C22 | 0.9 (4)      |
| C4—C5—C6—C7   | -179.6 (2)   | Ir1—C16—C17—C22 | 124.5 (3)    |
| C2—C1—C6—C5   | -0.8 (3)     | C15—C16—C17—Ir1 | 62.99 (15)   |
| Ir1—C1—C6—C5  | 178.32 (18)  | C21—C16—C17—Ir1 | -123.6 (2)   |
| C2—C1—C6—C7   | -179.7 (2)   | C1—Ir1—C17—C18  | 100.0 (3)    |
| Ir1—C1—C6—C7  | -0.5 (3)     | N1—Ir1—C17—C18  | -155.04 (15) |
| C11—N1—C7—C8  | -2.1 (3)     | C14—Ir1—C17—C18 | 36.74 (15)   |
| Ir1—N1—C7—C8  | -177.76 (18) | C16—Ir1—C17—C18 | 119.1 (2)    |
| C11—N1—C7—C6  | 177.1 (2)    | C15—Ir1—C17—C18 | 80.40 (16)   |
| Ir1—N1—C7—C6  | 1.5 (3)      | Cl1—Ir1—C17—C18 | -63.69 (16)  |
| C5—C6—C7—N1   | -179.4 (2)   | C1—Ir1—C17—C16  | -19.1 (4)    |

|                 |              |                 |             |
|-----------------|--------------|-----------------|-------------|
| C1—C6—C7—N1     | -0.6 (3)     | N1—Ir1—C17—C16  | 85.88 (15)  |
| C5—C6—C7—C8     | -0.2 (4)     | C14—Ir1—C17—C16 | -82.35 (16) |
| C1—C6—C7—C8     | 178.6 (2)    | C15—Ir1—C17—C16 | -38.69 (14) |
| N1—C7—C8—C9     | 1.5 (4)      | C18—Ir1—C17—C16 | -119.1 (2)  |
| C6—C7—C8—C9     | -177.7 (2)   | Cl1—Ir1—C17—C16 | 177.22 (13) |
| C7—C8—C9—C10    | -0.3 (4)     | C1—Ir1—C17—C22  | -137.5 (3)  |
| C8—C9—C10—C11   | -0.2 (4)     | N1—Ir1—C17—C22  | -32.5 (3)   |
| C7—N1—C11—C10   | 1.6 (4)      | C14—Ir1—C17—C22 | 159.3 (3)   |
| Ir1—N1—C11—C10  | 177.0 (2)    | C16—Ir1—C17—C22 | -118.3 (3)  |
| C9—C10—C11—N1   | -0.4 (4)     | C15—Ir1—C17—C22 | -157.0 (3)  |
| C1—Ir1—C14—C15  | -81.53 (15)  | C18—Ir1—C17—C22 | 122.6 (3)   |
| N1—Ir1—C14—C15  | 26.1 (4)     | Cl1—Ir1—C17—C22 | 58.9 (3)    |
| C16—Ir1—C14—C15 | 37.88 (14)   | C16—C17—C18—C14 | -0.7 (3)    |
| C18—Ir1—C14—C15 | 115.5 (2)    | C22—C17—C18—C14 | 175.0 (3)   |
| C17—Ir1—C14—C15 | 80.52 (15)   | Ir1—C17—C18—C14 | -58.14 (17) |
| Cl1—Ir1—C14—C15 | -175.54 (12) | C16—C17—C18—C23 | -179.9 (2)  |
| C1—Ir1—C14—C18  | 162.97 (14)  | C22—C17—C18—C23 | -4.2 (4)    |
| N1—Ir1—C14—C18  | -89.4 (4)    | Ir1—C17—C18—C23 | 122.7 (3)   |
| C16—Ir1—C14—C18 | -77.62 (15)  | C16—C17—C18—Ir1 | 57.47 (16)  |
| C15—Ir1—C14—C18 | -115.5 (2)   | C22—C17—C18—Ir1 | -126.8 (3)  |
| C17—Ir1—C14—C18 | -34.98 (14)  | C15—C14—C18—C17 | -2.1 (3)    |
| Cl1—Ir1—C14—C18 | 68.96 (14)   | C19—C14—C18—C17 | -174.0 (2)  |
| C1—Ir1—C14—C19  | 39.9 (3)     | Ir1—C14—C18—C17 | 61.05 (18)  |
| N1—Ir1—C14—C19  | 147.6 (3)    | C15—C14—C18—C23 | 177.1 (2)   |
| C16—Ir1—C14—C19 | 159.4 (3)    | C19—C14—C18—C23 | 5.2 (4)     |
| C15—Ir1—C14—C19 | 121.5 (3)    | Ir1—C14—C18—C23 | -119.7 (3)  |
| C18—Ir1—C14—C19 | -123.0 (3)   | C15—C14—C18—Ir1 | -63.16 (15) |
| C17—Ir1—C14—C19 | -158.0 (3)   | C19—C14—C18—Ir1 | 124.9 (2)   |

|                 |              |                 |              |
|-----------------|--------------|-----------------|--------------|
| Cl1—Ir1—C14—C19 | -54.1 (2)    | C1—Ir1—C18—C17  | -147.69 (16) |
| C18—C14—C15—C16 | 4.0 (3)      | N1—Ir1—C18—C17  | 38.2 (2)     |
| C19—C14—C15—C16 | 175.9 (2)    | C14—Ir1—C18—C17 | -120.3 (2)   |
| Ir1—C14—C15—C16 | -61.12 (15)  | C16—Ir1—C18—C17 | -37.36 (15)  |
| C18—C14—C15—C20 | -170.3 (2)   | C15—Ir1—C18—C17 | -81.01 (16)  |
| C19—C14—C15—C20 | 1.5 (4)      | Cl1—Ir1—C18—C17 | 122.53 (14)  |
| Ir1—C14—C15—C20 | 124.5 (2)    | C1—Ir1—C18—C14  | -27.4 (2)    |
| C18—C14—C15—Ir1 | 65.17 (16)   | N1—Ir1—C18—C14  | 158.44 (14)  |
| C19—C14—C15—Ir1 | -123.0 (2)   | C16—Ir1—C18—C14 | 82.91 (15)   |
| C1—Ir1—C15—C16  | -135.48 (14) | C15—Ir1—C18—C14 | 39.26 (14)   |
| N1—Ir1—C15—C16  | -54.79 (17)  | C17—Ir1—C18—C14 | 120.3 (2)    |
| C14—Ir1—C15—C16 | 117.5 (2)    | Cl1—Ir1—C18—C14 | -117.20 (13) |
| C18—Ir1—C15—C16 | 78.90 (15)   | C1—Ir1—C18—C23  | 90.3 (3)     |
| C17—Ir1—C15—C16 | 38.11 (14)   | N1—Ir1—C18—C23  | -83.8 (3)    |
| Cl1—Ir1—C15—C16 | 125.22 (13)  | C14—Ir1—C18—C23 | 117.7 (3)    |
| C1—Ir1—C15—C14  | 107.02 (15)  | C16—Ir1—C18—C23 | -159.4 (3)   |
| N1—Ir1—C15—C14  | -172.30 (13) | C15—Ir1—C18—C23 | 157.0 (3)    |
| C16—Ir1—C15—C14 | -117.5 (2)   | C17—Ir1—C18—C23 | -122.0 (3)   |
| C18—Ir1—C15—C14 | -38.61 (14)  | Cl1—Ir1—C18—C23 | 0.5 (2)      |
| C17—Ir1—C15—C14 | -79.40 (15)  |                 |              |

All e.s.d.'s (except the e.s.d. in the dihedral angle between two l.s. planes) are estimated using the full covariance matrix. The cell e.s.d.'s are taken into account individually in the estimation of e.s.d.'s in distances, angles and torsion angles; correlations between e.s.d.'s in cell parameters are only used when they are defined by crystal symmetry. An approximate (isotropic) treatment of cell e.s.d.'s is used for estimating e.s.d.'s involving l.s. planes.

### Computing details

Data collection: Bruker APEX2; cell refinement: Bruker SAINT; data reduction: Bruker SAINT; program(s) used to solve structure: SHELXS97 (Sheldrick, 2008); program(s) used to refine structure: SHELXL97 (Sheldrick, 1997); molecular graphics: Bruker SHELXTL; software used to prepare material for publication: Bruker SHELXTL.

### 3a

Table 1. Crystal data for 3a

|                                             |                                                                                                                                   |
|---------------------------------------------|-----------------------------------------------------------------------------------------------------------------------------------|
| Compound                                    | 3a                                                                                                                                |
| Molecular formula                           | C <sub>33</sub> H <sub>43</sub> ClIr <sub>2</sub> N <sub>2</sub> ,C <sub>3</sub> H <sub>6</sub> O <sub>2</sub> (F <sub>6</sub> P) |
| Molecular weight                            | 1235.56                                                                                                                           |
| Crystal habit                               | Orange Needle                                                                                                                     |
| Crystal dimensions(mm)                      | 0.28x0.12x0.10                                                                                                                    |
| Crystal system                              | monoclinic                                                                                                                        |
| Space group                                 | P2 <sub>1</sub> /c                                                                                                                |
| a(Å)                                        | 13.019(1)                                                                                                                         |
| b(Å)                                        | 20.090(1)                                                                                                                         |
| c(Å)                                        | 17.132(1)                                                                                                                         |
| α(°)                                        | 90.00                                                                                                                             |
| β(°)                                        | 108.824(1)                                                                                                                        |
| γ(°)                                        | 90.00                                                                                                                             |
| V(Å <sup>3</sup> )                          | 4241.2(5)                                                                                                                         |
| Z                                           | 4                                                                                                                                 |
| d(g-cm <sup>-3</sup> )                      | 1.935                                                                                                                             |
| F(000)                                      | 2384                                                                                                                              |
| μ(cm <sup>-1</sup> )                        | 6.492                                                                                                                             |
| Absorption corrections                      | multi-scan ; 0.2637 min, 0.5629 max                                                                                               |
| Diffractionmeter                            | KappaCCD                                                                                                                          |
| X-ray source                                | MoKα                                                                                                                              |
| λ(Å)                                        | 0.71069                                                                                                                           |
| Monochromator                               | graphite                                                                                                                          |
| T (K)                                       | 150.0(1)                                                                                                                          |
| Scan mode                                   | phi and omega scans                                                                                                               |
| Maximum θ                                   | 30.02                                                                                                                             |
| HKL ranges                                  | -15 18 ; -24 28 ; -24 22                                                                                                          |
| Reflections measured                        | 30593                                                                                                                             |
| Unique data                                 | 12327                                                                                                                             |
| R <sub>int</sub>                            | 0.0464                                                                                                                            |
| Reflections used                            | 8865                                                                                                                              |
| Criterion                                   | I > 2σ(I)                                                                                                                         |
| Refinement type                             | Fsqd                                                                                                                              |
| Hydrogen atoms                              | constr                                                                                                                            |
| Parameters refined                          | 519                                                                                                                               |
| Reflections / parameter                     | 17                                                                                                                                |
| wR <sub>2</sub>                             | 0.1312                                                                                                                            |
| R <sub>1</sub>                              | 0.0440                                                                                                                            |
| Weights a, b                                | 0.0768 ; 0.0000                                                                                                                   |
| GoF                                         | 0.990                                                                                                                             |
| difference peak / hole (e Å <sup>-3</sup> ) | 2.681(0.354) / -2.894(0.354)                                                                                                      |

Table 2. Atomic Coordinates ( $\text{\AA} \times 10^4$ ) and equivalent isotropic displacement parameters ( $\text{\AA}^2 \times 10^3$ ) for 3a

| atom  | x         | y       | z         | U(eq)  |
|-------|-----------|---------|-----------|--------|
| Ir(1) | -2412(1)  | 2201(1) | -1750(1)  | 23(1)  |
| Ir(2) | -5215(1)  | 3280(1) | -2826(1)  | 25(1)  |
| Cl(1) | -5559(2)  | 2616(1) | -1792(1)  | 52(1)  |
| N(1)  | -5395(4)  | 2388(2) | -3482(3)  | 32(1)  |
| N(2)  | -771(4)   | 3580(2) | -1753(3)  | 32(1)  |
| C(1)  | -3652(5)  | 2998(3) | -2579(4)  | 24(1)  |
| C(2)  | -2694(5)  | 3295(3) | -2032(4)  | 24(1)  |
| C(3)  | -1626(5)  | 3206(3) | -2129(4)  | 27(1)  |
| C(4)  | -1512(5)  | 2600(3) | -2560(4)  | 28(1)  |
| C(5)  | -2429(5)  | 2242(3) | -3029(4)  | 29(1)  |
| C(6)  | -3498(5)  | 2431(3) | -3045(4)  | 26(1)  |
| C(7)  | -4495(5)  | 2082(3) | -3528(4)  | 28(1)  |
| C(8)  | -4534(6)  | 1489(3) | -3949(4)  | 36(1)  |
| C(9)  | -5539(7)  | 1209(3) | -4349(5)  | 49(2)  |
| C(10) | -6471(6)  | 1514(4) | -4287(5)  | 56(2)  |
| C(11) | -6374(6)  | 2100(3) | -3855(6)  | 50(2)  |
| C(12) | -853(6)   | 4158(3) | -1256(5)  | 44(2)  |
| C(13) | 299(6)    | 3437(4) | -1805(6)  | 49(2)  |
| C(14) | -1540(6)  | 2048(3) | -453(4)   | 34(1)  |
| C(15) | -1200(5)  | 1552(3) | -919(4)   | 36(1)  |
| C(16) | -2143(6)  | 1156(3) | -1350(4)  | 33(1)  |
| C(17) | -3045(5)  | 1407(3) | -1129(4)  | 30(1)  |
| C(18) | -2680(5)  | 1956(3) | -583(4)   | 30(1)  |
| C(19) | -806(7)   | 2547(4) | 127(4)    | 54(2)  |
| C(20) | -93(6)    | 1432(4) | -941(6)   | 56(2)  |
| C(21) | -2126(7)  | 559(3)  | -1854(5)  | 52(2)  |
| C(22) | -4137(6)  | 1093(3) | -1385(5)  | 43(2)  |
| C(23) | -3316(7)  | 2316(3) | -118(4)   | 43(2)  |
| C(24) | -6551(6)  | 3871(3) | -3692(4)  | 40(2)  |
| C(25) | -6629(6)  | 3951(3) | -2900(5)  | 39(2)  |
| C(26) | -5613(6)  | 4226(3) | -2378(4)  | 40(2)  |
| C(27) | -4934(6)  | 4351(3) | -2871(5)  | 40(2)  |
| C(28) | -5495(6)  | 4093(3) | -3681(5)  | 41(2)  |
| C(29) | -7430(10) | 3623(4) | -4445(6)  | 84(3)  |
| C(30) | -7557(7)  | 3782(4) | -2616(7)  | 68(3)  |
| C(31) | -5380(10) | 4405(4) | -1481(6)  | 76(3)  |
| C(32) | -3891(6)  | 4707(4) | -2589(8)  | 74(3)  |
| C(33) | -5110(10) | 4162(5) | -4423(6)  | 84(4)  |
| P(1)  | -2267(2)  | 328(1)  | -4591(1)  | 36(1)  |
| F(1)  | -3530(4)  | 261(2)  | -4697(3)  | 51(1)  |
| F(2)  | -2054(5)  | -365(3) | -4127(4)  | 85(2)  |
| F(3)  | -1018(4)  | 386(2)  | -4489(3)  | 64(1)  |
| F(4)  | -2496(4)  | 1013(2) | -5077(4)  | 69(2)  |
| F(5)  | -2473(4)  | -45(2)  | -5453(3)  | 65(1)  |
| F(6)  | -2097(5)  | 711(3)  | -3758(3)  | 88(2)  |
| P(2)  | -1370(2)  | 4520(1) | -3936(1)  | 45(1)  |
| F(7)  | -1090(10) | 3775(3) | -3868(5)  | 163(4) |
| F(8)  | -1816(7)  | 4470(4) | -3211(4)  | 115(3) |
| F(9)  | -1550(10) | 5262(3) | -3986(5)  | 174(5) |
| F(10) | -850(10)  | 4551(5) | -4631(6)  | 171(4) |
| F(11) | -231(6)   | 4665(5) | -3253(6)  | 162(4) |
| F(12) | -2436(6)  | 4375(4) | -4605(5)  | 148(4) |
| O(1)  | -9219(7)  | 2052(4) | -2762(6)  | 110(3) |
| C(34) | -8625(8)  | 1586(4) | -2621(7)  | 64(2)  |
| C(35) | -7710(10) | 1556(8) | -1860(10) | 142(7) |
| C(36) | -8740(20) | 1052(6) | -3210(10) | 136(6) |

U(eq) is defined as 1/3 the trace of the  $U_{ij}$  tensor.

Table 3. Bond lengths (Å) and angles (deg) for 3a

|                   |          |                   |          |
|-------------------|----------|-------------------|----------|
| Ir(1)–C(14)       | 2.166(6) | Ir(1)–C(15)       | 2.184(6) |
| Ir(1)–C(5)        | 2.186(6) | Ir(1)–C(18)       | 2.193(6) |
| Ir(1)–C(16)       | 2.202(6) | Ir(1)–C(17)       | 2.218(5) |
| Ir(1)–C(4)        | 2.234(5) | Ir(1)–C(2)        | 2.254(5) |
| Ir(1)–C(6)        | 2.261(6) | Ir(1)–C(1)        | 2.390(6) |
| Ir(1)–C(3)        | 2.444(5) | Ir(2)–C(1)        | 2.021(6) |
| Ir(2)–N(1)        | 2.087(5) | Ir(2)–C(28)       | 2.145(6) |
| Ir(2)–C(26)       | 2.175(6) | Ir(2)–C(27)       | 2.188(6) |
| Ir(2)–C(24)       | 2.230(6) | Ir(2)–C(25)       | 2.251(6) |
| Ir(2)–Cl(1)       | 2.373(2) | N(1)–C(7)         | 1.349(8) |
| N(1)–C(11)        | 1.36(1)  | N(2)–C(3)         | 1.326(7) |
| N(2)–C(13)        | 1.453(8) | N(2)–C(12)        | 1.464(8) |
| C(1)–C(2)         | 1.426(8) | C(1)–C(6)         | 1.443(8) |
| C(2)–C(3)         | 1.463(8) | C(2)–H(2)         | 0.9500   |
| C(3)–C(4)         | 1.456(8) | C(4)–C(5)         | 1.40(1)  |
| C(4)–H(4)         | 0.9500   | C(5)–C(6)         | 1.434(8) |
| C(5)–H(5)         | 0.9500   | C(6)–C(7)         | 1.472(8) |
| C(7)–C(8)         | 1.385(8) | C(8)–C(9)         | 1.38(1)  |
| C(8)–H(8)         | 0.9500   | C(9)–C(10)        | 1.39(1)  |
| C(9)–H(9)         | 0.9500   | C(10)–C(11)       | 1.37(1)  |
| C(10)–H(10)       | 0.9500   | C(11)–H(11)       | 0.9500   |
| C(12)–H(12A)      | 0.9800   | C(12)–H(12B)      | 0.9800   |
| C(12)–H(12C)      | 0.9800   | C(13)–H(13A)      | 0.9800   |
| C(13)–H(13B)      | 0.9800   | C(13)–H(13C)      | 0.9800   |
| C(14)–C(15)       | 1.43(1)  | C(14)–C(18)       | 1.44(1)  |
| C(14)–C(19)       | 1.51(1)  | C(15)–C(16)       | 1.45(1)  |
| C(15)–C(20)       | 1.47(1)  | C(16)–C(17)       | 1.44(1)  |
| C(16)–C(21)       | 1.48(1)  | C(17)–C(18)       | 1.425(8) |
| C(17)–C(22)       | 1.49(1)  | C(18)–C(23)       | 1.506(8) |
| C(19)–H(19A)      | 0.9800   | C(19)–H(19B)      | 0.9800   |
| C(19)–H(19C)      | 0.9800   | C(20)–H(20A)      | 0.9800   |
| C(20)–H(20B)      | 0.9800   | C(20)–H(20C)      | 0.9800   |
| C(21)–H(21A)      | 0.9800   | C(21)–H(21B)      | 0.9800   |
| C(21)–H(21C)      | 0.9800   | C(22)–H(22A)      | 0.9800   |
| C(22)–H(22B)      | 0.9800   | C(22)–H(22C)      | 0.9800   |
| C(23)–H(23A)      | 0.9800   | C(23)–H(23B)      | 0.9800   |
| C(23)–H(23C)      | 0.9800   | C(24)–C(25)       | 1.40(1)  |
| C(24)–C(28)       | 1.44(1)  | C(24)–C(29)       | 1.50(1)  |
| C(25)–C(26)       | 1.45(1)  | C(25)–C(30)       | 1.48(1)  |
| C(26)–C(27)       | 1.43(1)  | C(26)–C(31)       | 1.51(1)  |
| C(27)–C(28)       | 1.44(1)  | C(27)–C(32)       | 1.47(1)  |
| C(28)–C(33)       | 1.52(1)  | C(29)–H(29A)      | 0.9800   |
| C(29)–H(29B)      | 0.9800   | C(29)–H(29C)      | 0.9800   |
| C(30)–H(30A)      | 0.9800   | C(30)–H(30B)      | 0.9800   |
| C(30)–H(30C)      | 0.9800   | C(31)–H(31A)      | 0.9800   |
| C(31)–H(31B)      | 0.9800   | C(31)–H(31C)      | 0.9800   |
| C(32)–H(32A)      | 0.9800   | C(32)–H(32B)      | 0.9800   |
| C(32)–H(32C)      | 0.9800   | C(33)–H(33A)      | 0.9800   |
| C(33)–H(33B)      | 0.9800   | C(33)–H(33C)      | 0.9800   |
| P(1)–F(6)         | 1.573(5) | P(1)–F(3)         | 1.582(5) |
| P(1)–F(2)         | 1.584(5) | P(1)–F(4)         | 1.586(5) |
| P(1)–F(5)         | 1.598(5) | P(1)–F(1)         | 1.601(5) |
| P(2)–F(9)         | 1.507(6) | P(2)–F(12)        | 1.516(7) |
| P(2)–F(8)         | 1.534(6) | P(2)–F(7)         | 1.538(7) |
| P(2)–F(10)        | 1.551(7) | P(2)–F(11)        | 1.592(8) |
| O(1)–C(34)        | 1.19(1)  | C(34)–C(36)       | 1.44(1)  |
| C(34)–C(35)       | 1.46(2)  | C(35)–H(35A)      | 0.9800   |
| C(35)–H(35B)      | 0.9800   | C(35)–H(35C)      | 0.9800   |
| C(36)–H(36A)      | 0.9800   | C(36)–H(36B)      | 0.9800   |
| C(36)–H(36C)      | 0.9800   |                   |          |
| C(14)–Ir(1)–C(15) | 38.5(2)  | C(14)–Ir(1)–C(5)  | 150.0(3) |
| C(15)–Ir(1)–C(5)  | 116.6(2) | C(14)–Ir(1)–C(18) | 38.6(2)  |

|                        |           |                        |           |
|------------------------|-----------|------------------------|-----------|
| C (15) –Ir (1) –C (18) | 64.3 (2)  | C (5) –Ir (1) –C (18)  | 165.7 (2) |
| C (14) –Ir (1) –C (16) | 64.4 (2)  | C (15) –Ir (1) –C (16) | 38.6 (2)  |
| C (5) –Ir (1) –C (16)  | 107.2 (2) | C (18) –Ir (1) –C (16) | 63.8 (2)  |
| C (14) –Ir (1) –C (17) | 63.8 (2)  | C (15) –Ir (1) –C (17) | 63.9 (2)  |
| C (5) –Ir (1) –C (17)  | 128.5 (2) | C (18) –Ir (1) –C (17) | 37.7 (2)  |
| C (16) –Ir (1) –C (17) | 37.9 (2)  | C (14) –Ir (1) –C (4)  | 118.8 (2) |
| C (15) –Ir (1) –C (4)  | 101.9 (2) | C (5) –Ir (1) –C (4)   | 37.0 (2)  |
| C (18) –Ir (1) –C (4)  | 156.4 (2) | C (16) –Ir (1) –C (4)  | 118.2 (2) |
| C (17) –Ir (1) –C (4)  | 155.0 (2) | C (14) –Ir (1) –C (2)  | 110.8 (2) |
| C (15) –Ir (1) –C (2)  | 139.1 (2) | C (5) –Ir (1) –C (2)   | 78.5 (2)  |
| C (18) –Ir (1) –C (2)  | 110.6 (2) | C (16) –Ir (1) –C (2)  | 174.3 (2) |
| C (17) –Ir (1) –C (2)  | 138.1 (2) | C (4) –Ir (1) –C (2)   | 66.3 (2)  |
| C (14) –Ir (1) –C (6)  | 172.1 (2) | C (15) –Ir (1) –C (6)  | 148.5 (2) |
| C (5) –Ir (1) –C (6)   | 37.6 (2)  | C (18) –Ir (1) –C (6)  | 135.0 (2) |
| C (16) –Ir (1) –C (6)  | 119.1 (2) | C (17) –Ir (1) –C (6)  | 113.9 (2) |
| C (4) –Ir (1) –C (6)   | 66.7 (2)  | C (2) –Ir (1) –C (6)   | 65.4 (2)  |
| C (14) –Ir (1) –C (1)  | 137.4 (2) | C (15) –Ir (1) –C (1)  | 174.6 (2) |
| C (5) –Ir (1) –C (1)   | 65.9 (2)  | C (18) –Ir (1) –C (1)  | 114.6 (2) |
| C (16) –Ir (1) –C (1)  | 146.4 (2) | C (17) –Ir (1) –C (1)  | 118.9 (2) |
| C (4) –Ir (1) –C (1)   | 77.2 (2)  | C (2) –Ir (1) –C (1)   | 35.6 (2)  |
| C (6) –Ir (1) –C (1)   | 36.0 (2)  | C (14) –Ir (1) –C (3)  | 105.4 (2) |
| C (15) –Ir (1) –C (3)  | 113.0 (2) | C (5) –Ir (1) –C (3)   | 64.7 (2)  |
| C (18) –Ir (1) –C (3)  | 129.2 (2) | C (16) –Ir (1) –C (3)  | 146.3 (2) |
| C (17) –Ir (1) –C (3)  | 166.8 (2) | C (4) –Ir (1) –C (3)   | 35.9 (2)  |
| C (2) –Ir (1) –C (3)   | 36.0 (2)  | C (6) –Ir (1) –C (3)   | 75.7 (2)  |
| C (1) –Ir (1) –C (3)   | 63.2 (2)  | C (1) –Ir (2) –N (1)   | 78.7 (2)  |
| C (1) –Ir (2) –C (28)  | 107.1 (2) | N (1) –Ir (2) –C (28)  | 108.8 (2) |
| C (1) –Ir (2) –C (26)  | 120.6 (3) | N (1) –Ir (2) –C (26)  | 160.4 (2) |
| C (28) –Ir (2) –C (26) | 64.4 (3)  | C (1) –Ir (2) –C (27)  | 96.5 (2)  |
| N (1) –Ir (2) –C (27)  | 144.7 (3) | C (28) –Ir (2) –C (27) | 38.8 (3)  |
| C (26) –Ir (2) –C (27) | 38.2 (3)  | C (1) –Ir (2) –C (24)  | 143.6 (3) |
| N (1) –Ir (2) –C (24)  | 99.8 (2)  | C (28) –Ir (2) –C (24) | 38.4 (3)  |
| C (26) –Ir (2) –C (24) | 63.0 (3)  | C (27) –Ir (2) –C (24) | 63.7 (3)  |
| C (1) –Ir (2) –C (25)  | 158.2 (2) | N (1) –Ir (2) –C (25)  | 122.4 (2) |
| C (28) –Ir (2) –C (25) | 63.2 (2)  | C (26) –Ir (2) –C (25) | 38.1 (3)  |
| C (27) –Ir (2) –C (25) | 63.4 (2)  | C (24) –Ir (2) –C (25) | 36.5 (3)  |
| C (1) –Ir (2) –Cl (1)  | 96.1 (2)  | N (1) –Ir (2) –Cl (1)  | 84.5 (2)  |
| C (28) –Ir (2) –Cl (1) | 155.0 (2) | C (26) –Ir (2) –Cl (1) | 95.9 (2)  |
| C (27) –Ir (2) –Cl (1) | 130.8 (2) | C (24) –Ir (2) –Cl (1) | 120.1 (2) |
| C (25) –Ir (2) –Cl (1) | 91.7 (2)  | C (7) –N (1) –C (11)   | 118.7 (5) |
| C (7) –N (1) –Ir (2)   | 118.3 (4) | C (11) –N (1) –Ir (2)  | 123.0 (4) |
| C (3) –N (2) –C (13)   | 122.0 (5) | C (3) –N (2) –C (12)   | 121.6 (5) |
| C (13) –N (2) –C (12)  | 116.4 (5) | C (2) –C (1) –C (6)    | 116.5 (5) |
| C (2) –C (1) –Ir (2)   | 129.0 (4) | C (6) –C (1) –Ir (2)   | 114.5 (4) |
| C (2) –C (1) –Ir (1)   | 67.0 (3)  | C (6) –C (1) –Ir (1)   | 67.1 (3)  |
| Ir (2) –C (1) –Ir (1)  | 138.9 (3) | C (1) –C (2) –C (3)    | 122.4 (5) |
| C (1) –C (2) –Ir (1)   | 77.4 (3)  | C (3) –C (2) –Ir (1)   | 79.1 (3)  |
| C (1) –C (2) –H (2)    | 118.8     | C (3) –C (2) –H (2)    | 118.8     |
| Ir (1) –C (2) –H (2)   | 115.0     | N (2) –C (3) –C (4)    | 120.9 (5) |
| N (2) –C (3) –C (2)    | 123.8 (5) | C (4) –C (3) –C (2)    | 114.6 (5) |
| N (2) –C (3) –Ir (1)   | 134.2 (4) | C (4) –C (3) –Ir (1)   | 64.2 (3)  |
| C (2) –C (3) –Ir (1)   | 64.9 (3)  | C (5) –C (4) –C (3)    | 120.8 (5) |
| C (5) –C (4) –Ir (1)   | 69.6 (3)  | C (3) –C (4) –Ir (1)   | 79.9 (3)  |
| C (5) –C (4) –H (4)    | 119.6     | C (3) –C (4) –H (4)    | 119.6     |
| Ir (1) –C (4) –H (4)   | 121.9     | C (4) –C (5) –C (6)    | 121.1 (5) |
| C (4) –C (5) –Ir (1)   | 73.4 (3)  | C (6) –C (5) –Ir (1)   | 74.1 (3)  |
| C (4) –C (5) –H (5)    | 119.4     | C (6) –C (5) –H (5)    | 119.4     |
| Ir (1) –C (5) –H (5)   | 124.8     | C (5) –C (6) –C (1)    | 120.3 (5) |
| C (5) –C (6) –C (7)    | 124.0 (5) | C (1) –C (6) –C (7)    | 115.6 (5) |
| C (5) –C (6) –Ir (1)   | 68.3 (3)  | C (1) –C (6) –Ir (1)   | 76.8 (3)  |
| C (7) –C (6) –Ir (1)   | 127.9 (4) | N (1) –C (7) –C (8)    | 122.4 (6) |
| N (1) –C (7) –C (6)    | 112.1 (5) | C (8) –C (7) –C (6)    | 125.4 (6) |
| C (9) –C (8) –C (7)    | 118.5 (6) | C (9) –C (8) –H (8)    | 120.8     |
| C (7) –C (8) –H (8)    | 120.8     | C (8) –C (9) –C (10)   | 119.4 (6) |
| C (8) –C (9) –H (9)    | 120.3     | C (10) –C (9) –H (9)   | 120.3     |
| C (11) –C (10) –C (9)  | 119.1 (7) | C (11) –C (10) –H (10) | 120.4     |
| C (9) –C (10) –H (10)  | 120.4     | N (1) –C (11) –C (10)  | 121.8 (7) |

|                     |          |                     |          |
|---------------------|----------|---------------------|----------|
| N(1)–C(11)–H(11)    | 119.1    | C(10)–C(11)–H(11)   | 119.1    |
| N(2)–C(12)–H(12A)   | 109.5    | N(2)–C(12)–H(12B)   | 109.5    |
| H(12A)–C(12)–H(12B) | 109.5    | N(2)–C(12)–H(12C)   | 109.5    |
| H(12A)–C(12)–H(12C) | 109.5    | H(12B)–C(12)–H(12C) | 109.5    |
| N(2)–C(13)–H(13A)   | 109.5    | N(2)–C(13)–H(13B)   | 109.5    |
| H(13A)–C(13)–H(13B) | 109.5    | N(2)–C(13)–H(13C)   | 109.5    |
| H(13A)–C(13)–H(13C) | 109.5    | H(13B)–C(13)–H(13C) | 109.5    |
| C(15)–C(14)–C(18)   | 108.3(5) | C(15)–C(14)–C(19)   | 125.7(7) |
| C(18)–C(14)–C(19)   | 125.9(6) | C(15)–C(14)–Ir(1)   | 71.4(4)  |
| C(18)–C(14)–Ir(1)   | 71.7(3)  | C(19)–C(14)–Ir(1)   | 126.1(4) |
| C(14)–C(15)–C(16)   | 107.6(6) | C(14)–C(15)–C(20)   | 127.4(7) |
| C(16)–C(15)–C(20)   | 124.9(7) | C(14)–C(15)–Ir(1)   | 70.1(4)  |
| C(16)–C(15)–Ir(1)   | 71.4(4)  | C(20)–C(15)–Ir(1)   | 126.0(5) |
| C(17)–C(16)–C(15)   | 107.5(5) | C(17)–C(16)–C(21)   | 127.3(6) |
| C(15)–C(16)–C(21)   | 124.9(6) | C(17)–C(16)–Ir(1)   | 71.6(3)  |
| C(15)–C(16)–Ir(1)   | 70.0(3)  | C(21)–C(16)–Ir(1)   | 128.4(5) |
| C(18)–C(17)–C(16)   | 108.6(5) | C(18)–C(17)–C(22)   | 127.3(6) |
| C(16)–C(17)–C(22)   | 123.9(6) | C(18)–C(17)–Ir(1)   | 70.2(3)  |
| C(16)–C(17)–Ir(1)   | 70.4(3)  | C(22)–C(17)–Ir(1)   | 129.2(5) |
| C(17)–C(18)–C(14)   | 108.0(5) | C(17)–C(18)–C(23)   | 126.5(6) |
| C(14)–C(18)–C(23)   | 124.9(6) | C(17)–C(18)–Ir(1)   | 72.1(3)  |
| C(14)–C(18)–Ir(1)   | 69.7(3)  | C(23)–C(18)–Ir(1)   | 130.6(4) |
| C(14)–C(19)–H(19A)  | 109.5    | C(14)–C(19)–H(19B)  | 109.5    |
| H(19A)–C(19)–H(19B) | 109.5    | C(14)–C(19)–H(19C)  | 109.5    |
| H(19A)–C(19)–H(19C) | 109.5    | H(19B)–C(19)–H(19C) | 109.5    |
| C(15)–C(20)–H(20A)  | 109.5    | C(15)–C(20)–H(20B)  | 109.5    |
| H(20A)–C(20)–H(20B) | 109.5    | C(15)–C(20)–H(20C)  | 109.5    |
| H(20A)–C(20)–H(20C) | 109.5    | H(20B)–C(20)–H(20C) | 109.5    |
| C(16)–C(21)–H(21A)  | 109.5    | C(16)–C(21)–H(21B)  | 109.5    |
| H(21A)–C(21)–H(21B) | 109.5    | C(16)–C(21)–H(21C)  | 109.5    |
| H(21A)–C(21)–H(21C) | 109.5    | H(21B)–C(21)–H(21C) | 109.5    |
| C(17)–C(22)–H(22A)  | 109.5    | C(17)–C(22)–H(22B)  | 109.5    |
| H(22A)–C(22)–H(22B) | 109.5    | C(17)–C(22)–H(22C)  | 109.5    |
| H(22A)–C(22)–H(22C) | 109.5    | H(22B)–C(22)–H(22C) | 109.5    |
| C(18)–C(23)–H(23A)  | 109.5    | C(18)–C(23)–H(23B)  | 109.5    |
| H(23A)–C(23)–H(23B) | 109.5    | C(18)–C(23)–H(23C)  | 109.5    |
| H(23A)–C(23)–H(23C) | 109.5    | H(23B)–C(23)–H(23C) | 109.5    |
| C(25)–C(24)–C(28)   | 108.5(6) | C(25)–C(24)–C(29)   | 126.6(8) |
| C(28)–C(24)–C(29)   | 124.8(8) | C(25)–C(24)–Ir(2)   | 72.6(4)  |
| C(28)–C(24)–Ir(2)   | 67.6(4)  | C(29)–C(24)–Ir(2)   | 127.4(5) |
| C(24)–C(25)–C(26)   | 107.8(6) | C(24)–C(25)–C(30)   | 127.8(8) |
| C(26)–C(25)–C(30)   | 124.4(8) | C(24)–C(25)–Ir(2)   | 70.9(4)  |
| C(26)–C(25)–Ir(2)   | 68.1(3)  | C(30)–C(25)–Ir(2)   | 125.7(4) |
| C(27)–C(26)–C(25)   | 108.5(6) | C(27)–C(26)–C(31)   | 127.0(8) |
| C(25)–C(26)–C(31)   | 124.2(7) | C(27)–C(26)–Ir(2)   | 71.4(3)  |
| C(25)–C(26)–Ir(2)   | 73.8(3)  | C(31)–C(26)–Ir(2)   | 125.2(5) |
| C(26)–C(27)–C(28)   | 106.8(6) | C(26)–C(27)–C(32)   | 124.9(8) |
| C(28)–C(27)–C(32)   | 128.3(8) | C(26)–C(27)–Ir(2)   | 70.4(3)  |
| C(28)–C(27)–Ir(2)   | 69.0(3)  | C(32)–C(27)–Ir(2)   | 127.8(5) |
| C(27)–C(28)–C(24)   | 108.1(6) | C(27)–C(28)–C(33)   | 124.9(8) |
| C(24)–C(28)–C(33)   | 126.2(8) | C(27)–C(28)–Ir(2)   | 72.2(4)  |
| C(24)–C(28)–Ir(2)   | 74.0(4)  | C(33)–C(28)–Ir(2)   | 127.7(5) |
| C(24)–C(29)–H(29A)  | 109.5    | C(24)–C(29)–H(29B)  | 109.5    |
| H(29A)–C(29)–H(29B) | 109.5    | C(24)–C(29)–H(29C)  | 109.5    |
| H(29A)–C(29)–H(29C) | 109.5    | H(29B)–C(29)–H(29C) | 109.5    |
| C(25)–C(30)–H(30A)  | 109.5    | C(25)–C(30)–H(30B)  | 109.5    |
| H(30A)–C(30)–H(30B) | 109.5    | C(25)–C(30)–H(30C)  | 109.5    |
| H(30A)–C(30)–H(30C) | 109.5    | H(30B)–C(30)–H(30C) | 109.5    |
| C(26)–C(31)–H(31A)  | 109.5    | C(26)–C(31)–H(31B)  | 109.5    |
| H(31A)–C(31)–H(31B) | 109.5    | C(26)–C(31)–H(31C)  | 109.5    |
| H(31A)–C(31)–H(31C) | 109.5    | H(31B)–C(31)–H(31C) | 109.5    |
| C(27)–C(32)–H(32A)  | 109.5    | C(27)–C(32)–H(32B)  | 109.5    |
| H(32A)–C(32)–H(32B) | 109.5    | C(27)–C(32)–H(32C)  | 109.5    |
| H(32A)–C(32)–H(32C) | 109.5    | H(32B)–C(32)–H(32C) | 109.5    |
| C(28)–C(33)–H(33A)  | 109.5    | C(28)–C(33)–H(33B)  | 109.5    |
| H(33A)–C(33)–H(33B) | 109.5    | C(28)–C(33)–H(33C)  | 109.5    |
| H(33A)–C(33)–H(33C) | 109.5    | H(33B)–C(33)–H(33C) | 109.5    |

|                     |          |                     |          |
|---------------------|----------|---------------------|----------|
| F(6)–P(1)–F(3)      | 91.4(3)  | F(6)–P(1)–F(2)      | 91.4(3)  |
| F(3)–P(1)–F(2)      | 90.1(3)  | F(6)–P(1)–F(4)      | 90.0(3)  |
| F(3)–P(1)–F(4)      | 90.4(3)  | F(2)–P(1)–F(4)      | 178.6(4) |
| F(6)–P(1)–F(5)      | 178.1(3) | F(3)–P(1)–F(5)      | 89.9(3)  |
| F(2)–P(1)–F(5)      | 90.0(3)  | F(4)–P(1)–F(5)      | 88.6(3)  |
| F(6)–P(1)–F(1)      | 89.0(3)  | F(3)–P(1)–F(1)      | 179.4(3) |
| F(2)–P(1)–F(1)      | 89.4(3)  | F(4)–P(1)–F(1)      | 90.1(2)  |
| F(5)–P(1)–F(1)      | 89.7(3)  | F(9)–P(2)–F(12)     | 93.6(5)  |
| F(9)–P(2)–F(8)      | 91.2(5)  | F(12)–P(2)–F(8)     | 96.1(5)  |
| F(9)–P(2)–F(7)      | 175.0(6) | F(12)–P(2)–F(7)     | 90.5(5)  |
| F(8)–P(2)–F(7)      | 91.1(5)  | F(9)–P(2)–F(10)     | 90.8(5)  |
| F(12)–P(2)–F(10)    | 87.1(6)  | F(8)–P(2)–F(10)     | 176.2(6) |
| F(7)–P(2)–F(10)     | 86.6(5)  | F(9)–P(2)–F(11)     | 87.1(5)  |
| F(12)–P(2)–F(11)    | 178.2(5) | F(8)–P(2)–F(11)     | 85.6(5)  |
| F(7)–P(2)–F(11)     | 88.7(5)  | F(10)–P(2)–F(11)    | 91.3(6)  |
| O(1)–C(34)–C(36)    | 122(1)   | O(1)–C(34)–C(35)    | 120(1)   |
| C(36)–C(34)–C(35)   | 118(1)   | C(34)–C(35)–H(35A)  | 109.5    |
| C(34)–C(35)–H(35B)  | 109.5    | H(35A)–C(35)–H(35B) | 109.5    |
| C(34)–C(35)–H(35C)  | 109.5    | H(35A)–C(35)–H(35C) | 109.5    |
| H(35B)–C(35)–H(35C) | 109.5    | C(34)–C(36)–H(36A)  | 109.5    |
| C(34)–C(36)–H(36B)  | 109.5    | H(36A)–C(36)–H(36B) | 109.5    |
| C(34)–C(36)–H(36C)  | 109.5    | H(36A)–C(36)–H(36C) | 109.5    |
| H(36B)–C(36)–H(36C) | 109.5    |                     |          |

Table 5. Hydrogen Coordinates ( $\text{\AA} \times 10^4$ ) and equivalent isotropic displacement parameters ( $\text{\AA}^2 \times 10^3$ ) for 3a

| atom   | x          | y    | z          | U(eq) |
|--------|------------|------|------------|-------|
| H(2)   | -2751      | 3559 | -1588.9999 | 29    |
| H(4)   | -807.9999  | 2445 | -2523      | 34    |
| H(5)   | -2340      | 1868 | -3340      | 35    |
| H(8)   | -3887      | 1278 | -3963      | 43    |
| H(9)   | -5593      | 813  | -4662      | 58    |
| H(10)  | -7164.0005 | 1320 | -4539      | 67    |
| H(11)  | -7011      | 2309 | -3816      | 60    |
| H(12A) | -1581      | 4351 | -1477      | 65    |
| H(12B) | -312       | 4491 | -1275      | 65    |
| H(12C) | -722       | 4018 | -684       | 65    |
| H(13A) | 633        | 3075 | -1423      | 73    |
| H(13B) | 754        | 3836 | -1657      | 73    |
| H(13C) | 233        | 3303 | -2369      | 73    |
| H(19A) | -452       | 2336 | 662        | 81    |
| H(19B) | -1238      | 2927 | 200        | 81    |
| H(19C) | -253       | 2702 | -107.0000  | 81    |
| H(20A) | 340        | 1838 | -776       | 84    |
| H(20B) | -126       | 1309 | -1502      | 84    |
| H(20C) | 242        | 1071 | -560       | 84    |
| H(21A) | -1883      | 173  | -1492.0001 | 77    |
| H(21B) | -1626      | 634  | -2168      | 77    |
| H(21C) | -2857      | 476  | -2236      | 77    |
| H(22A) | -4108      | 680  | -1074      | 65    |
| H(22B) | -4364      | 993  | -1976.0001 | 65    |
| H(22C) | -4658      | 1400 | -1273      | 65    |
| H(23A) | -4093.9998 | 2243 | -393.0000  | 64    |
| H(23B) | -3159      | 2794 | -107.0000  | 64    |
| H(23C) | -3111      | 2146 | 447        | 64    |
| H(29A) | -7595.0005 | 3158 | -4362      | 127   |
| H(29B) | -7176      | 3653 | -4925      | 127   |
| H(29C) | -8080.0005 | 3896 | -4539      | 127   |
| H(30A) | -7932      | 4191 | -2552      | 101   |
| H(30B) | -7292      | 3551 | -2085      | 101   |
| H(30C) | -8062.0005 | 3492 | -3022      | 101   |
| H(31A) | -4604      | 4493 | -1227      | 114   |
| H(31B) | -5596      | 4035 | -1195      | 114   |
| H(31C) | -5795      | 4804 | -1441      | 114   |
| H(32A) | -3423      | 4549 | -2898      | 111   |
| H(32B) | -3537      | 4623 | -1999      | 111   |
| H(32C) | -4019      | 5184 | -2681      | 111   |
| H(33A) | -5518      | 4516 | -4784      | 126   |
| H(33B) | -5220      | 3741 | -4727      | 126   |
| H(33C) | -4333      | 4275 | -4237      | 126   |
| H(35A) | -7039      | 1491 | -1988      | 214   |
| H(35B) | -7815      | 1184 | -1521      | 214   |
| H(35C) | -7669      | 1974 | -1553.0001 | 214   |
| H(36A) | -9295      | 1169 | -3726      | 204   |
| H(36B) | -8948      | 643  | -2985      | 204   |
| H(36C) | -8043      | 982  | -3303      | 204   |

#### 4a

Table 1. Crystal data for 4a

|                   |                                                                         |
|-------------------|-------------------------------------------------------------------------|
| Compound          | <b>4a</b>                                                               |
| Molecular formula | $\text{C}_{33}\text{H}_{43}\text{ClIrN}_2\text{Ru}_2\text{F}_6\text{P}$ |
| Molecular weight  | 941.38                                                                  |
| Crystal habit     | Orange Plate                                                            |

|                                             |                                     |
|---------------------------------------------|-------------------------------------|
| Crystal dimensions(mm)                      | 0.24x0.18x0.12                      |
| Crystal system                              | monoclinic                          |
| Space group                                 | P2 <sub>1</sub> /c                  |
| a(Å)                                        | 8.671(1)                            |
| b(Å)                                        | 13.989(1)                           |
| c(Å)                                        | 28.862(1)                           |
| $\alpha(^{\circ})$                          | 90.00                               |
| $\beta(^{\circ})$                           | 105.194(2)                          |
| $\gamma(^{\circ})$                          | 90.00                               |
| V(Å <sup>3</sup> )                          | 3378.5(5)                           |
| Z                                           | 4                                   |
| d(g-cm <sup>-3</sup> )                      | 1.851                               |
| F(000)                                      | 1848                                |
| $\mu(\text{cm}^{-1})$                       | 4.568                               |
| Absorption corrections                      | multi-scan ; 0.4069 min, 0.6102 max |
| Diffractometer                              | KappaCCD                            |
| X-ray source                                | MoK $\alpha$                        |
| $\lambda(\text{\AA})$                       | 0.71069                             |
| Monochromator                               | graphite                            |
| T (K)                                       | 150.0(1)                            |
| Scan mode                                   | phi and omega scans                 |
| Maximum $\theta$                            | 30.02                               |
| HKL ranges                                  | -12 12 ; -19 18 ; -31 40            |
| Reflections measured                        | 29565                               |
| Unique data                                 | 9531                                |
| Rint                                        | 0.0298                              |
| Reflections used                            | 7714                                |
| Criterion                                   | I > 2 $\sigma$ (I)                  |
| Refinement type                             | Fsqd                                |
| Hydrogen atoms                              | constr                              |
| Parameters refined                          | 454                                 |
| Reflections / parameter                     | 16                                  |
| wR2                                         | 0.0704                              |
| R1                                          | 0.0314                              |
| Weights a, b                                | 0.0378 ; 0.0000                     |
| GoF                                         | 1.023                               |
| difference peak / hole (e Å <sup>-3</sup> ) | 1.624(0.118) / -1.549(0.118)        |

Table 2. Atomic Coordinates ( $\text{\AA} \times 10^4$ ) and equivalent isotropic displacement parameters ( $\text{\AA}^2 \times 10^3$ ) for 4a

| atom   | x         | y         | z         | U(eq) |
|--------|-----------|-----------|-----------|-------|
| Ir(1)  | 8450(1)   | -1379(1)  | -1163(1)  | 26(1) |
| Ru(1)  | 7935(1)   | -4272(1)  | -1522(1)  | 25(1) |
| Cl(1)  | 8766(1)   | -1371(1)  | -1960(1)  | 35(1) |
| N(1)   | 6036(3)   | -1695(2)  | -1467(1)  | 30(1) |
| N(2)   | 10850(3)  | -4923(2)  | -515(1)   | 33(1) |
| C(1)   | 4964(4)   | -1058(2)  | -1718(1)  | 36(1) |
| C(2)   | 3354(4)   | -1248(3)  | -1854(2)  | 43(1) |
| C(3)   | 2809(4)   | -2104(3)  | -1728(2)  | 46(1) |
| C(4)   | 3891(4)   | -2781(2)  | -1488(2)  | 40(1) |
| C(5)   | 5519(3)   | -2565(2)  | -1366(1)  | 30(1) |
| C(6)   | 6830(3)   | -3208(2)  | -1130(1)  | 26(1) |
| C(7)   | 8396(3)   | -2840(2)  | -1085(1)  | 24(1) |
| C(8)   | 9692(3)   | -3471(2)  | -933(1)   | 26(1) |
| C(9)   | 9532(4)   | -4388(2)  | -739(1)   | 28(1) |
| C(10)  | 7955(3)   | -4738(2)  | -789(1)   | 29(1) |
| C(11)  | 6610(3)   | -4151(2)  | -977(1)   | 31(1) |
| C(12)  | 10654(4)  | -5932(2)  | -425(1)   | 39(1) |
| C(13)  | 12437(4)  | -4594(2)  | -510(2)   | 45(1) |
| C(14)  | 8544(4)   | -4284(2)  | -2217(1)  | 32(1) |
| C(15)  | 6853(4)   | -4150(2)  | -2297(1)  | 36(1) |
| C(16)  | 6241(4)   | -4977(2)  | -2107(1)  | 35(1) |
| C(17)  | 7553(4)   | -5606(2)  | -1920(1)  | 38(1) |
| C(18)  | 8974(4)   | -5176(2)  | -1979(1)  | 34(1) |
| C(19)  | 9645(5)   | -3665(2)  | -2405(2)  | 51(1) |
| C(20)  | 5910(5)   | -3321(3)  | -2558(2)  | 52(1) |
| C(21)  | 4519(4)   | -5171(3)  | -2123(2)  | 54(1) |
| C(22)  | 7412(5)   | -6596(2)  | -1717(2)  | 52(1) |
| C(23)  | 10609(4)  | -5627(3)  | -1852(2)  | 52(1) |
| C(24A) | 9421(6)   | -1134(3)  | -408(2)   | 33(1) |
| C(25A) | 10632(4)  | -927(3)   | -645(2)   | 31(1) |
| C(26A) | 10079(7)  | -118(4)   | -943(3)   | 41(1) |
| C(27A) | 8514(7)   | 135(5)    | -915(3)   | 38(1) |
| C(28A) | 8107(5)   | -500(4)   | -579(2)   | 38(1) |
| C(29A) | 9560(10)  | -1858(3)  | -11(2)    | 62(2) |
| C(30A) | 12272(5)  | -1374(4)  | -537(3)   | 67(2) |
| C(31A) | 11000(10) | 382(5)    | -1251(3)  | 76(2) |
| C(32A) | 7530(10)  | 961(4)    | -1174(3)  | 79(3) |
| C(33A) | 6572(6)   | -530(5)   | -424(3)   | 71(2) |
| C(24B) | 8740(20)  | -1000(10) | -421(6)   | 33(1) |
| C(25B) | 10270(20) | -1030(10) | -521(7)   | 31(1) |
| C(26B) | 10290(30) | -370(20)  | -900(10)  | 41(1) |
| C(27B) | 8830(30)  | 160(20)   | -1010(10) | 38(1) |
| C(28B) | 7860(20)  | -290(20)  | -735(6)   | 38(1) |
| C(29B) | 8430(30)  | -1590(10) | -17(6)    | 62(2) |
| C(30B) | 11680(20) | -1630(10) | -263(8)   | 67(2) |
| C(31B) | 11640(30) | -20(20)   | -1090(10) | 76(2) |
| C(32B) | 8410(30)  | 1020(10)  | -1330(10) | 79(3) |
| C(33B) | 6270(20)  | 30(20)    | -670(10)  | 71(2) |
| P(1)   | 4595(1)   | -7215(1)  | -717(1)   | 41(1) |
| F(1)   | 4660(3)   | -7630(2)  | -1226(1)  | 67(1) |
| F(2)   | 4481(4)   | -6165(2)  | -932(1)   | 84(1) |
| F(3)   | 4529(3)   | -6791(2)  | -209(1)   | 66(1) |
| F(4)   | 4714(3)   | -8265(2)  | -506(1)   | 76(1) |
| F(5)   | 2705(2)   | -7296(2)  | -874(1)   | 68(1) |
| F(6)   | 6497(3)   | -7119(2)  | -565(1)   | 71(1) |

U(eq) is defined as 1/3 the trace of the  $U_{ij}$  tensor.

Table 3. Bond lengths (Å) and angles (deg) for 4a

|                     |          |                     |          |
|---------------------|----------|---------------------|----------|
| Ir(1)–C(7)          | 2.058(3) | Ir(1)–N(1)          | 2.094(2) |
| Ir(1)–C(28B)        | 2.11(2)  | Ir(1)–C(26B)        | 2.12(3)  |
| Ir(1)–C(24A)        | 2.149(5) | Ir(1)–C(25B)        | 2.15(2)  |
| Ir(1)–C(24B)        | 2.16(2)  | Ir(1)–C(28A)        | 2.170(6) |
| Ir(1)–C(25A)        | 2.176(5) | Ir(1)–C(27B)        | 2.20(3)  |
| Ir(1)–C(27A)        | 2.232(8) | Ir(1)–C(26A)        | 2.246(7) |
| Ru(1)–C(16)         | 2.165(3) | Ru(1)–C(17)         | 2.172(3) |
| Ru(1)–C(11)         | 2.183(3) | Ru(1)–C(18)         | 2.186(3) |
| Ru(1)–C(15)         | 2.195(4) | Ru(1)–C(14)         | 2.204(3) |
| Ru(1)–C(10)         | 2.210(3) | Ru(1)–C(6)          | 2.232(3) |
| Ru(1)–C(8)          | 2.259(3) | Ru(1)–C(9)          | 2.325(3) |
| Ru(1)–C(7)          | 2.344(3) | N(1)–C(1)           | 1.353(4) |
| N(1)–C(5)           | 1.354(4) | N(2)–C(9)           | 1.378(4) |
| N(2)–C(13)          | 1.448(4) | N(2)–C(12)          | 1.453(4) |
| C(1)–C(2)           | 1.373(5) | C(2)–C(3)           | 1.371(5) |
| C(3)–C(4)           | 1.385(5) | C(4)–C(5)           | 1.395(4) |
| C(5)–C(6)           | 1.470(4) | C(6)–C(11)          | 1.420(4) |
| C(6)–C(7)           | 1.427(4) | C(7)–C(8)           | 1.405(4) |
| C(8)–C(9)           | 1.422(4) | C(9)–C(10)          | 1.423(4) |
| C(10)–C(11)         | 1.414(4) | C(14)–C(18)         | 1.426(5) |
| C(14)–C(15)         | 1.435(4) | C(14)–C(19)         | 1.494(4) |
| C(15)–C(16)         | 1.439(5) | C(15)–C(20)         | 1.503(5) |
| C(16)–C(17)         | 1.428(5) | C(16)–C(21)         | 1.507(4) |
| C(17)–C(18)         | 1.421(4) | C(17)–C(22)         | 1.521(5) |
| C(18)–C(23)         | 1.506(4) | C(24A)–C(28A)       | 1.425(2) |
| C(24A)–C(25A)       | 1.426(2) | C(24A)–C(29A)       | 1.510(2) |
| C(25A)–C(26A)       | 1.426(2) | C(25A)–C(30A)       | 1.510(2) |
| C(26A)–C(27A)       | 1.426(2) | C(26A)–C(31A)       | 1.510(2) |
| C(27A)–C(28A)       | 1.427(2) | C(27A)–C(32A)       | 1.511(2) |
| C(28A)–C(33A)       | 1.511(2) | C(24B)–C(25B)       | 1.425(2) |
| C(24B)–C(28B)       | 1.425(2) | C(24B)–C(29B)       | 1.510(2) |
| C(25B)–C(26B)       | 1.425(2) | C(25B)–C(30B)       | 1.510(2) |
| C(26B)–C(27B)       | 1.425(2) | C(26B)–C(31B)       | 1.510(2) |
| C(27B)–C(28B)       | 1.425(2) | C(27B)–C(32B)       | 1.510(2) |
| C(28B)–C(33B)       | 1.510(2) | P(1)–F(4)           | 1.583(2) |
| P(1)–F(5)           | 1.586(2) | P(1)–F(2)           | 1.588(3) |
| P(1)–F(1)           | 1.594(3) | P(1)–F(3)           | 1.595(3) |
| P(1)–F(6)           | 1.597(2) |                     |          |
| C(7)–Ir(1)–N(1)     | 77.7(1)  | C(7)–Ir(1)–C(28B)   | 129.8(5) |
| N(1)–Ir(1)–C(28B)   | 91.8(5)  | C(7)–Ir(1)–C(26B)   | 131.1(5) |
| N(1)–Ir(1)–C(26B)   | 150.3(5) | C(28B)–Ir(1)–C(26B) | 64.9(8)  |
| C(7)–Ir(1)–C(24A)   | 93.5(1)  | N(1)–Ir(1)–C(24A)   | 122.8(1) |
| C(28B)–Ir(1)–C(24A) | 51.7(4)  | C(26B)–Ir(1)–C(24A) | 57.7(6)  |
| C(7)–Ir(1)–C(25B)   | 99.3(4)  | N(1)–Ir(1)–C(25B)   | 146.6(4) |
| C(28B)–Ir(1)–C(25B) | 64.3(6)  | C(26B)–Ir(1)–C(25B) | 39.0(3)  |
| C(24A)–Ir(1)–C(25B) | 23.9(4)  | C(7)–Ir(1)–C(24B)   | 97.9(4)  |
| N(1)–Ir(1)–C(24B)   | 108.3(4) | C(28B)–Ir(1)–C(24B) | 39.0(2)  |
| C(26B)–Ir(1)–C(24B) | 65.8(7)  | C(24A)–Ir(1)–C(24B) | 16.2(3)  |
| C(25B)–Ir(1)–C(24B) | 38.6(2)  | C(7)–Ir(1)–C(28A)   | 117.8(2) |
| N(1)–Ir(1)–C(28A)   | 96.9(1)  | C(28B)–Ir(1)–C(28A) | 14.3(4)  |
| C(26B)–Ir(1)–C(28A) | 65.3(7)  | C(24A)–Ir(1)–C(28A) | 38.54(8) |
| C(25B)–Ir(1)–C(28A) | 54.6(4)  | C(24B)–Ir(1)–C(28A) | 24.8(4)  |
| C(7)–Ir(1)–C(25A)   | 104.7(1) | N(1)–Ir(1)–C(25A)   | 160.6(1) |
| C(28B)–Ir(1)–C(25A) | 71.7(5)  | C(26B)–Ir(1)–C(25A) | 28.2(5)  |
| C(24A)–Ir(1)–C(25A) | 38.51(8) | C(25B)–Ir(1)–C(25A) | 14.8(4)  |
| C(24B)–Ir(1)–C(25A) | 52.4(4)  | C(28A)–Ir(1)–C(25A) | 64.7(2)  |
| C(7)–Ir(1)–C(27B)   | 162.2(7) | N(1)–Ir(1)–C(27B)   | 111.9(6) |
| C(28B)–Ir(1)–C(27B) | 38.5(4)  | C(26B)–Ir(1)–C(27B) | 38.5(4)  |
| C(24A)–Ir(1)–C(27B) | 68.6(7)  | C(25B)–Ir(1)–C(27B) | 64.2(8)  |
| C(24B)–Ir(1)–C(27B) | 65.2(8)  | C(28A)–Ir(1)–C(27B) | 47.9(6)  |
| C(25A)–Ir(1)–C(27B) | 61.2(7)  | C(7)–Ir(1)–C(27A)   | 155.0(2) |
| N(1)–Ir(1)–C(27A)   | 105.9(2) | C(28B)–Ir(1)–C(27A) | 27.6(6)  |

|                          |           |                          |           |
|--------------------------|-----------|--------------------------|-----------|
| C (26B) –Ir (1) –C (27A) | 45.4 (6)  | C (24A) –Ir (1) –C (27A) | 63.4 (2)  |
| C (25B) –Ir (1) –C (27A) | 63.8 (5)  | C (24B) –Ir (1) –C (27A) | 57.3 (4)  |
| C (28A) –Ir (1) –C (27A) | 37.8 (1)  | C (25A) –Ir (1) –C (27A) | 63.9 (2)  |
| C (27B) –Ir (1) –C (27A) | 11.0 (5)  | C (7) –Ir (1) –C (26A)   | 141.2 (1) |
| N (1) –Ir (1) –C (26A)   | 140.4 (1) | C (28B) –Ir (1) –C (26A) | 59.7 (6)  |
| C (26B) –Ir (1) –C (26A) | 10.1 (5)  | C (24A) –Ir (1) –C (26A) | 62.5 (2)  |
| C (25B) –Ir (1) –C (26A) | 46.7 (5)  | C (24B) –Ir (1) –C (26A) | 67.8 (4)  |
| C (28A) –Ir (1) –C (26A) | 62.6 (2)  | C (25A) –Ir (1) –C (26A) | 37.6 (1)  |
| C (27B) –Ir (1) –C (26A) | 29.1 (6)  | C (27A) –Ir (1) –C (26A) | 37.1 (1)  |
| C (16) –Ru (1) –C (17)   | 38.4 (1)  | C (16) –Ru (1) –C (11)   | 102.7 (1) |
| C (17) –Ru (1) –C (11)   | 114.3 (1) | C (16) –Ru (1) –C (18)   | 64.3 (1)  |
| C (17) –Ru (1) –C (18)   | 38.1 (1)  | C (11) –Ru (1) –C (18)   | 149.0 (1) |
| C (16) –Ru (1) –C (15)   | 38.5 (1)  | C (17) –Ru (1) –C (15)   | 64.0 (1)  |
| C (11) –Ru (1) –C (15)   | 124.3 (1) | C (18) –Ru (1) –C (15)   | 64.1 (1)  |
| C (16) –Ru (1) –C (14)   | 64.0 (1)  | C (17) –Ru (1) –C (14)   | 63.3 (1)  |
| C (11) –Ru (1) –C (14)   | 162.3 (1) | C (18) –Ru (1) –C (14)   | 37.9 (1)  |
| C (15) –Ru (1) –C (14)   | 38.1 (1)  | C (16) –Ru (1) –C (10)   | 116.5 (1) |
| C (17) –Ru (1) –C (10)   | 102.4 (1) | C (11) –Ru (1) –C (10)   | 37.5 (1)  |
| C (18) –Ru (1) –C (10)   | 120.4 (1) | C (15) –Ru (1) –C (10)   | 153.3 (1) |
| C (14) –Ru (1) –C (10)   | 157.7 (1) | C (16) –Ru (1) –C (6)    | 114.0 (1) |
| C (17) –Ru (1) –C (6)    | 144.6 (1) | C (11) –Ru (1) –C (6)    | 37.5 (1)  |
| C (18) –Ru (1) –C (6)    | 172.6 (1) | C (15) –Ru (1) –C (6)    | 109.8 (1) |
| C (14) –Ru (1) –C (6)    | 134.7 (1) | C (10) –Ru (1) –C (6)    | 67.0 (1)  |
| C (16) –Ru (1) –C (8)    | 177.2 (1) | C (17) –Ru (1) –C (8)    | 143.5 (1) |
| C (11) –Ru (1) –C (8)    | 78.4 (1)  | C (18) –Ru (1) –C (8)    | 115.9 (1) |
| C (15) –Ru (1) –C (8)    | 138.7 (1) | C (14) –Ru (1) –C (8)    | 114.4 (1) |
| C (10) –Ru (1) –C (8)    | 65.9 (1)  | C (6) –Ru (1) –C (8)     | 65.3 (1)  |
| C (16) –Ru (1) –C (9)    | 146.7 (1) | C (17) –Ru (1) –C (9)    | 115.1 (1) |
| C (11) –Ru (1) –C (9)    | 66.3 (1)  | C (18) –Ru (1) –C (9)    | 108.2 (1) |
| C (15) –Ru (1) –C (9)    | 169.3 (1) | C (14) –Ru (1) –C (9)    | 131.3 (1) |
| C (10) –Ru (1) –C (9)    | 36.5 (1)  | C (6) –Ru (1) –C (9)     | 77.3 (1)  |
| C (8) –Ru (1) –C (9)     | 36.1 (1)  | C (16) –Ru (1) –C (7)    | 142.6 (1) |
| C (17) –Ru (1) –C (7)    | 178.9 (1) | C (11) –Ru (1) –C (7)    | 66.1 (1)  |
| C (18) –Ru (1) –C (7)    | 141.2 (1) | C (15) –Ru (1) –C (7)    | 116.7 (1) |
| C (14) –Ru (1) –C (7)    | 116.6 (1) | C (10) –Ru (1) –C (7)    | 77.3 (1)  |
| C (6) –Ru (1) –C (7)     | 36.2 (1)  | C (8) –Ru (1) –C (7)     | 35.5 (1)  |
| C (9) –Ru (1) –C (7)     | 64.1 (1)  | C (1) –N (1) –C (5)      | 119.2 (3) |
| C (1) –N (1) –Ir (1)     | 123.8 (2) | C (5) –N (1) –Ir (1)     | 116.8 (2) |
| C (9) –N (2) –C (13)     | 120.1 (3) | C (9) –N (2) –C (12)     | 119.3 (3) |
| C (13) –N (2) –C (12)    | 117.5 (2) | N (1) –C (1) –C (2)      | 122.0 (3) |
| C (3) –C (2) –C (1)      | 119.3 (3) | C (2) –C (3) –C (4)      | 119.6 (3) |
| C (3) –C (4) –C (5)      | 119.1 (3) | N (1) –C (5) –C (4)      | 120.7 (3) |
| N (1) –C (5) –C (6)      | 113.0 (2) | C (4) –C (5) –C (6)      | 126.3 (3) |
| C (11) –C (6) –C (7)     | 120.6 (3) | C (11) –C (6) –C (5)     | 124.2 (3) |
| C (7) –C (6) –C (5)      | 115.0 (3) | C (11) –C (6) –Ru (1)    | 69.4 (2)  |
| C (7) –C (6) –Ru (1)     | 76.2 (2)  | C (5) –C (6) –Ru (1)     | 123.8 (2) |
| C (8) –C (7) –C (6)      | 117.7 (3) | C (8) –C (7) –Ir (1)     | 128.2 (2) |
| C (6) –C (7) –Ir (1)     | 113.4 (2) | C (8) –C (7) –Ru (1)     | 68.9 (2)  |
| C (6) –C (7) –Ru (1)     | 67.6 (2)  | Ir (1) –C (7) –Ru (1)    | 142.7 (2) |
| C (7) –C (8) –C (9)      | 122.5 (3) | C (7) –C (8) –Ru (1)     | 75.6 (2)  |
| C (9) –C (8) –Ru (1)     | 74.5 (2)  | N (2) –C (9) –C (8)      | 121.4 (3) |
| N (2) –C (9) –C (10)     | 121.2 (3) | C (8) –C (9) –C (10)     | 117.5 (3) |
| N (2) –C (9) –Ru (1)     | 134.7 (2) | C (8) –C (9) –Ru (1)     | 69.4 (2)  |
| C (10) –C (9) –Ru (1)    | 67.3 (2)  | C (11) –C (10) –C (9)    | 120.8 (3) |
| C (11) –C (10) –Ru (1)   | 70.2 (2)  | C (9) –C (10) –Ru (1)    | 76.2 (2)  |
| C (10) –C (11) –C (6)    | 119.7 (3) | C (10) –C (11) –Ru (1)   | 72.3 (2)  |
| C (6) –C (11) –Ru (1)    | 73.1 (2)  | C (18) –C (14) –C (15)   | 108.7 (3) |
| C (18) –C (14) –C (19)   | 124.8 (3) | C (15) –C (14) –C (19)   | 126.0 (3) |
| C (18) –C (14) –Ru (1)   | 70.4 (2)  | C (15) –C (14) –Ru (1)   | 70.6 (2)  |
| C (19) –C (14) –Ru (1)   | 131.0 (2) | C (14) –C (15) –C (16)   | 107.2 (3) |
| C (14) –C (15) –C (20)   | 125.5 (3) | C (16) –C (15) –C (20)   | 127.2 (3) |
| C (14) –C (15) –Ru (1)   | 71.3 (2)  | C (16) –C (15) –Ru (1)   | 69.6 (2)  |
| C (20) –C (15) –Ru (1)   | 127.1 (3) | C (17) –C (16) –C (15)   | 107.7 (3) |
| C (17) –C (16) –C (21)   | 125.8 (3) | C (15) –C (16) –C (21)   | 126.5 (3) |
| C (17) –C (16) –Ru (1)   | 71.0 (2)  | C (15) –C (16) –Ru (1)   | 71.8 (2)  |
| C (21) –C (16) –Ru (1)   | 124.7 (3) | C (18) –C (17) –C (16)   | 108.9 (3) |
| C (18) –C (17) –C (22)   | 126.2 (3) | C (16) –C (17) –C (22)   | 124.8 (3) |

|                           |           |                           |           |
|---------------------------|-----------|---------------------------|-----------|
| C (18) –C (17) –Ru (1)    | 71.5 (2)  | C (16) –C (17) –Ru (1)    | 70.6 (2)  |
| C (22) –C (17) –Ru (1)    | 126.6 (3) | C (17) –C (18) –C (14)    | 107.6 (3) |
| C (17) –C (18) –C (23)    | 125.7 (3) | C (14) –C (18) –C (23)    | 126.5 (3) |
| C (17) –C (18) –Ru (1)    | 70.4 (2)  | C (14) –C (18) –Ru (1)    | 71.7 (2)  |
| C (23) –C (18) –Ru (1)    | 127.3 (3) | C (28A) –C (24A) –C (25A) | 109.3 (3) |
| C (28A) –C (24A) –C (29A) | 125.2 (4) | C (25A) –C (24A) –C (29A) | 125.4 (4) |
| C (28A) –C (24A) –Ir (1)  | 71.5 (3)  | C (25A) –C (24A) –Ir (1)  | 71.8 (3)  |
| C (29A) –C (24A) –Ir (1)  | 126.5 (3) | C (24A) –C (25A) –C (26A) | 106.1 (3) |
| C (24A) –C (25A) –C (30A) | 126.0 (4) | C (26A) –C (25A) –C (30A) | 127.1 (4) |
| C (24A) –C (25A) –Ir (1)  | 69.7 (2)  | C (26A) –C (25A) –Ir (1)  | 73.9 (3)  |
| C (30A) –C (25A) –Ir (1)  | 128.6 (4) | C (27A) –C (26A) –C (25A) | 109.7 (3) |
| C (27A) –C (26A) –C (31A) | 125.1 (4) | C (25A) –C (26A) –C (31A) | 125.2 (4) |
| C (27A) –C (26A) –Ir (1)  | 70.9 (4)  | C (25A) –C (26A) –Ir (1)  | 68.5 (3)  |
| C (31A) –C (26A) –Ir (1)  | 125.9 (6) | C (26A) –C (27A) –C (28A) | 107.1 (3) |
| C (26A) –C (27A) –C (32A) | 125.6 (5) | C (28A) –C (27A) –C (32A) | 127.2 (5) |
| C (26A) –C (27A) –Ir (1)  | 72.0 (4)  | C (28A) –C (27A) –Ir (1)  | 68.8 (4)  |
| C (32A) –C (27A) –Ir (1)  | 127.1 (6) | C (24A) –C (28A) –C (27A) | 107.7 (3) |
| C (24A) –C (28A) –C (33A) | 124.5 (4) | C (27A) –C (28A) –C (33A) | 127.8 (4) |
| C (24A) –C (28A) –Ir (1)  | 69.9 (3)  | C (27A) –C (28A) –Ir (1)  | 73.4 (4)  |
| C (33A) –C (28A) –Ir (1)  | 121.6 (4) | C (25B) –C (24B) –C (28B) | 105 (1)   |
| C (25B) –C (24B) –C (29B) | 120 (2)   | C (28B) –C (24B) –C (29B) | 134 (2)   |
| C (25B) –C (24B) –Ir (1)  | 71 (1)    | C (28B) –C (24B) –Ir (1)  | 69 (1)    |
| C (29B) –C (24B) –Ir (1)  | 129 (1)   | C (24B) –C (25B) –C (26B) | 109 (1)   |
| C (24B) –C (25B) –C (30B) | 127 (2)   | C (26B) –C (25B) –C (30B) | 124 (2)   |
| C (24B) –C (25B) –Ir (1)  | 71 (1)    | C (26B) –C (25B) –Ir (1)  | 69 (1)    |
| C (30B) –C (25B) –Ir (1)  | 128 (1)   | C (27B) –C (26B) –C (25B) | 109 (1)   |
| C (27B) –C (26B) –C (31B) | 119 (2)   | C (25B) –C (26B) –C (31B) | 131 (2)   |
| C (27B) –C (26B) –Ir (1)  | 74 (2)    | C (25B) –C (26B) –Ir (1)  | 72 (1)    |
| C (31B) –C (26B) –Ir (1)  | 131 (2)   | C (26B) –C (27B) –C (28B) | 106 (1)   |
| C (26B) –C (27B) –C (32B) | 127 (2)   | C (28B) –C (27B) –C (32B) | 127 (2)   |
| C (26B) –C (27B) –Ir (1)  | 68 (2)    | C (28B) –C (27B) –Ir (1)  | 67 (1)    |
| C (32B) –C (27B) –Ir (1)  | 131 (2)   | C (24B) –C (28B) –C (27B) | 111 (1)   |
| C (24B) –C (28B) –C (33B) | 118 (2)   | C (27B) –C (28B) –C (33B) | 129 (2)   |
| C (24B) –C (28B) –Ir (1)  | 72 (1)    | C (27B) –C (28B) –Ir (1)  | 74 (2)    |
| C (33B) –C (28B) –Ir (1)  | 131 (2)   | F (4) –P (1) –F (5)       | 90.1 (2)  |
| F (4) –P (1) –F (2)       | 179.5 (2) | F (5) –P (1) –F (2)       | 90.0 (2)  |
| F (4) –P (1) –F (1)       | 90.1 (2)  | F (5) –P (1) –F (1)       | 89.6 (1)  |
| F (2) –P (1) –F (1)       | 89.4 (2)  | F (4) –P (1) –F (3)       | 90.3 (2)  |
| F (5) –P (1) –F (3)       | 90.3 (1)  | F (2) –P (1) –F (3)       | 90.1 (2)  |
| F (1) –P (1) –F (3)       | 179.6 (2) | F (4) –P (1) –F (6)       | 90.8 (1)  |
| F (5) –P (1) –F (6)       | 179.0 (2) | F (2) –P (1) –F (6)       | 89.1 (2)  |
| F (1) –P (1) –F (6)       | 90.0 (1)  | F (3) –P (1) –F (6)       | 90.0 (1)  |

Table 4. Anisotropic displacement parameters ( $\text{\AA}^2 \times 10^3$ ) for 4a

| atom   | U11    | U22   | U33   | U23    | U13    | U12    |
|--------|--------|-------|-------|--------|--------|--------|
| Ir(1)  | 27(1)  | 25(1) | 23(1) | 0(1)   | 3(1)   | 3(1)   |
| Ru(1)  | 24(1)  | 27(1) | 25(1) | -4(1)  | 6(1)   | -2(1)  |
| Cl(1)  | 30(1)  | 49(1) | 25(1) | 2(1)   | 5(1)   | 5(1)   |
| N(1)   | 25(1)  | 38(1) | 24(2) | -5(1)  | 1(1)   | 8(1)   |
| N(2)   | 35(1)  | 29(1) | 33(2) | 4(1)   | 4(1)   | 8(1)   |
| C(1)   | 37(2)  | 43(2) | 27(2) | 3(2)   | 7(1)   | 14(1)  |
| C(2)   | 32(2)  | 56(2) | 38(2) | -3(2)  | 1(2)   | 18(2)  |
| C(3)   | 26(2)  | 63(2) | 46(3) | -14(2) | 1(2)   | 10(2)  |
| C(4)   | 27(2)  | 43(2) | 47(3) | -11(2) | 5(2)   | 1(1)   |
| C(5)   | 25(1)  | 35(2) | 29(2) | -8(1)  | 6(1)   | 3(1)   |
| C(6)   | 23(1)  | 30(1) | 26(2) | -7(1)  | 6(1)   | 2(1)   |
| C(7)   | 24(1)  | 25(2) | 22(2) | -3(1)  | 3(1)   | 2(1)   |
| C(8)   | 26(1)  | 26(1) | 25(2) | -6(1)  | 7(1)   | 0(1)   |
| C(9)   | 41(2)  | 26(2) | 20(2) | -4(1)  | 10(1)  | -1(1)  |
| C(10)  | 34(2)  | 27(2) | 29(2) | -1(1)  | 13(1)  | -1(1)  |
| C(11)  | 27(1)  | 36(2) | 31(2) | -5(1)  | 11(1)  | -2(1)  |
| C(12)  | 52(2)  | 31(2) | 33(2) | 1(2)   | 9(2)   | 10(1)  |
| C(13)  | 30(2)  | 40(2) | 59(3) | 7(2)   | 4(2)   | 12(1)  |
| C(14)  | 32(2)  | 40(2) | 26(2) | -10(1) | 10(1)  | -7(1)  |
| C(15)  | 35(2)  | 42(2) | 25(2) | -6(2)  | -2(1)  | -2(1)  |
| C(16)  | 33(2)  | 42(2) | 30(2) | -15(2) | 7(1)   | -11(1) |
| C(17)  | 48(2)  | 36(2) | 34(2) | -12(2) | 14(2)  | -8(1)  |
| C(18)  | 38(2)  | 40(2) | 27(2) | -12(1) | 11(1)  | -2(1)  |
| C(19)  | 63(2)  | 54(2) | 44(3) | -17(2) | 30(2)  | -25(2) |
| C(20)  | 53(2)  | 57(2) | 37(3) | 0(2)   | -7(2)  | 7(2)   |
| C(21)  | 38(2)  | 77(3) | 49(3) | -25(2) | 14(2)  | -22(2) |
| C(22)  | 80(3)  | 33(2) | 45(3) | -7(2)  | 20(2)  | -12(2) |
| C(23)  | 45(2)  | 67(2) | 47(3) | -14(2) | 16(2)  | 17(2)  |
| C(24A) | 40(3)  | 27(2) | 29(2) | -6(2)  | 2(3)   | -3(2)  |
| C(25A) | 27(2)  | 31(2) | 32(3) | -7(2)  | 4(2)   | -6(2)  |
| C(26A) | 53(3)  | 26(4) | 45(3) | -15(3) | 18(3)  | -16(2) |
| C(27A) | 57(4)  | 21(2) | 30(4) | -5(2)  | 3(2)   | 7(2)   |
| C(28A) | 45(3)  | 43(4) | 24(4) | -18(3) | 7(3)   | -2(2)  |
| C(29A) | 116(6) | 39(3) | 26(3) | -2(2)  | 7(4)   | -12(3) |
| C(30A) | 31(3)  | 84(4) | 74(5) | -46(4) | -9(2)  | 9(2)   |
| C(31A) | 116(6) | 68(5) | 53(6) | -10(3) | 38(5)  | -48(4) |
| C(32A) | 110(6) | 39(3) | 63(6) | -10(3) | -21(4) | 34(4)  |
| C(33A) | 56(3)  | 88(5) | 78(6) | -48(4) | 34(4)  | -10(3) |
| C(24B) | 40(3)  | 27(2) | 29(2) | -6(2)  | 2(3)   | -3(2)  |
| C(25B) | 27(2)  | 31(2) | 32(3) | -7(2)  | 4(2)   | -6(2)  |
| C(26B) | 53(3)  | 26(4) | 45(3) | -15(3) | 18(3)  | -16(2) |
| C(27B) | 57(4)  | 21(2) | 30(4) | -5(2)  | 3(2)   | 7(2)   |
| C(28B) | 45(3)  | 43(4) | 24(4) | -18(3) | 7(3)   | -2(2)  |
| C(29B) | 116(6) | 39(3) | 26(3) | -2(2)  | 7(4)   | -12(3) |
| C(30B) | 31(3)  | 84(4) | 74(5) | -46(4) | -9(2)  | 9(2)   |
| C(31B) | 116(6) | 68(5) | 53(6) | -10(3) | 38(5)  | -48(4) |
| C(32B) | 110(6) | 39(3) | 63(6) | -10(3) | -21(4) | 34(4)  |
| C(33B) | 56(3)  | 88(5) | 78(6) | -48(4) | 34(4)  | -10(3) |
| P(1)   | 41(1)  | 39(1) | 45(1) | 1(1)   | 13(1)  | 7(1)   |
| F(1)   | 69(2)  | 80(2) | 58(2) | -18(1) | 27(1)  | 5(1)   |
| F(2)   | 119(2) | 46(1) | 87(3) | 14(2)  | 26(2)  | 5(1)   |
| F(3)   | 60(1)  | 88(2) | 48(2) | -18(1) | 11(1)  | 8(1)   |
| F(4)   | 90(2)  | 50(1) | 85(3) | 21(1)  | 15(2)  | 7(1)   |
| F(5)   | 39(1)  | 96(2) | 65(2) | -18(2) | 7(1)   | 14(1)  |
| F(6)   | 42(1)  | 85(2) | 87(2) | -18(2) | 16(1)  | -1(1)  |

The anisotropic displacement factor exponent takes the form  
 $2 \pi^2 [h^2 a^{*2} U(11) + \dots + 2 h k a^* b^* U(12)]$

Table 5. Hydrogen Coordinates ( $\text{\AA} \times 10^4$ ) and equivalent isotropic displacement parameters ( $\text{\AA}^2 \times 10^3$ ) for 4a

| atom   | x     | y          | z          | U(eq) |
|--------|-------|------------|------------|-------|
| H(1)   | 5335  | -461.0000  | -1802      | 43    |
| H(2)   | 2627  | -792       | -2033      | 52    |
| H(3)   | 1694  | -2232      | -1806      | 56    |
| H(4)   | 3529  | -3384      | -1408      | 48    |
| H(8)   | 10712 | -3274.9998 | -961.9999  | 31    |
| H(10)  | 7803  | -5375      | -695       | 35    |
| H(11)  | 5564  | -4386      | -1001.0001 | 37    |
| H(12A) | 9884  | -6007      | -233       | 59    |
| H(12B) | 11686 | -6203      | -251       | 59    |
| H(12C) | 10261 | -6266.0005 | -732       | 59    |
| H(13A) | 12571 | -4616      | -837       | 67    |
| H(13B) | 13235 | -5007      | -300       | 67    |
| H(13C) | 12580 | -3935.9998 | -390       | 67    |
| H(19A) | 10742 | -3747      | -2207      | 76    |
| H(19B) | 9326  | -2994      | -2396      | 76    |
| H(19C) | 9590  | -3847      | -2737      | 76    |
| H(20A) | 6581  | -2746.9998 | -2507      | 79    |
| H(20B) | 4972  | -3212.0002 | -2436      | 79    |
| H(20C) | 5564  | -3465      | -2902      | 79    |
| H(21A) | 4004  | -5511      | -2420      | 81    |
| H(21B) | 3965  | -4564      | -2113      | 81    |
| H(21C) | 4467  | -5563      | -1846      | 81    |
| H(22A) | 7259  | -7070.9995 | -1975      | 78    |
| H(22B) | 6496  | -6612      | -1578      | 78    |
| H(22C) | 8391  | -6743.9995 | -1468      | 78    |
| H(23A) | 10756 | -5990      | -2127      | 78    |
| H(23B) | 10710 | -6057.9995 | -1578      | 78    |
| H(23C) | 11425 | -5126      | -1767      | 78    |
| H(29A) | 9898  | -1536.0001 | 301        | 94    |
| H(29B) | 10346 | -2345      | -34        | 94    |
| H(29C) | 8517  | -2162      | -43        | 94    |
| H(30A) | 13036 | -970       | -310       | 100   |
| H(30B) | 12607 | -1435      | -835       | 100   |
| H(30C) | 12239 | -2009      | -396       | 100   |
| H(31A) | 10266 | 554        | -1560      | 114   |
| H(31B) | 11829 | -46        | -1305      | 114   |
| H(31C) | 11495 | 961        | -1088      | 114   |
| H(32A) | 7914  | 1559       | -1005.9999 | 118   |
| H(32B) | 6408  | 864        | -1181      | 118   |
| H(32C) | 7639  | 996        | -1503      | 118   |
| H(33A) | 6296  | -1196      | -378       | 106   |
| H(33B) | 5712  | -236.0000  | -673       | 106   |
| H(33C) | 6714  | -179       | -122       | 106   |
| H(29D) | 8881  | -2230      | -25        | 94    |
| H(29E) | 7280  | -1636      | -56.0000   | 94    |
| H(29F) | 8941  | -1284      | 291        | 94    |
| H(30D) | 11355 | -2076      | -46        | 100   |
| H(30E) | 12529 | -1210      | -78        | 100   |
| H(30F) | 12088 | -1987      | -499       | 100   |
| H(31D) | 11217 | 143        | -1432      | 114   |
| H(31E) | 12444 | -523       | -1059      | 114   |
| H(31F) | 12120 | 549        | -914       | 114   |
| H(32D) | 9262  | 1499       | -1232      | 118   |
| H(32E) | 7402  | 1292       | -1297      | 118   |
| H(32F) | 8304  | 829        | -1661      | 118   |
| H(33D) | 5758  | -512       | -552       | 106   |
| H(33E) | 5590  | 256        | -973       | 106   |
| H(33F) | 6442  | 547        | -430       | 106   |

## 5b

Table 1. Crystal data for 5b

|                                             |                                                                                                      |
|---------------------------------------------|------------------------------------------------------------------------------------------------------|
| Compound                                    | 5b                                                                                                   |
| Molecular formula                           | C <sub>30</sub> H <sub>36</sub> ClCrIrN <sub>2</sub> O <sub>3</sub> ·C <sub>3</sub> H <sub>6</sub> O |
| Molecular weight                            | 810.34                                                                                               |
| Crystal habit                               | Orange Needle                                                                                        |
| Crystal dimensions(mm)                      | 0.34x0.04x0.02                                                                                       |
| Crystal system                              | monoclinic                                                                                           |
| Space group                                 | P2 <sub>1</sub> /c                                                                                   |
| a(Å)                                        | 10.649(1)                                                                                            |
| b(Å)                                        | 15.812(1)                                                                                            |
| c(Å)                                        | 21.131(1)                                                                                            |
| α(°)                                        | 90.00                                                                                                |
| β(°)                                        | 107.397(3)                                                                                           |
| γ(°)                                        | 90.00                                                                                                |
| V(Å <sup>3</sup> )                          | 3395.3(4)                                                                                            |
| Z                                           | 4                                                                                                    |
| d(g·cm <sup>-3</sup> )                      | 1.585                                                                                                |
| F(000)                                      | 1616                                                                                                 |
| μ(cm <sup>-1</sup> )                        | 4.351                                                                                                |
| Absorption corrections                      | multi-scan ; 0.3193 min, 0.9180 max                                                                  |
| Diffractometer                              | KappaCCD                                                                                             |
| X-ray source                                | MoKα                                                                                                 |
| λ(Å)                                        | 0.71069                                                                                              |
| Monochromator                               | graphite                                                                                             |
| T (K)                                       | 150.0(1)                                                                                             |
| Scan mode                                   | phi and omega scans                                                                                  |
| Maximum θ                                   | 29.95                                                                                                |
| HKL ranges                                  | -12 14 ; -22 20 ; -24 29                                                                             |
| Reflections measured                        | 26792                                                                                                |
| Unique data                                 | 9667                                                                                                 |
| R <sub>int</sub>                            | 0.0494                                                                                               |
| Reflections used                            | 6935                                                                                                 |
| Criterion                                   | I > 2σ(I)                                                                                            |
| Refinement type                             | Fsqd                                                                                                 |
| Hydrogen atoms                              | constr                                                                                               |
| Parameters refined                          | 391                                                                                                  |
| Reflections / parameter                     | 17                                                                                                   |
| wR <sub>2</sub>                             | 0.0624                                                                                               |
| R <sub>1</sub>                              | 0.0495                                                                                               |
| Weights a, b                                | 0.0095 ; 4.6460                                                                                      |
| GoF                                         | 1.127                                                                                                |
| difference peak / hole (e Å <sup>-3</sup> ) | 0.943(0.193) / -0.940(0.193)                                                                         |

Table 2. Atomic Coordinates ( $\text{\AA} \times 10^4$ ) and equivalent isotropic displacement parameters ( $\text{\AA}^2 \times 10^3$ ) for 5b

| atom  | x        | y        | z        | U(eq)  |
|-------|----------|----------|----------|--------|
| Ir(1) | 3505(1)  | -5334(1) | -3025(1) | 16(1)  |
| Cr(1) | 244(1)   | -3865(1) | -3482(1) | 19(1)  |
| Cl(1) | 3559(1)  | -6041(1) | -4023(1) | 27(1)  |
| O(1)  | -539(4)  | -2067(3) | -3803(2) | 49(1)  |
| O(2)  | 2106(3)  | -3075(3) | -2282(2) | 43(1)  |
| O(3)  | -1654(3) | -4033(3) | -2695(2) | 35(1)  |
| N(1)  | 3947(4)  | -4257(3) | -3500(2) | 18(1)  |
| N(2)  | -1877(4) | -5513(3) | -4069(2) | 25(1)  |
| C(1)  | 1674(4)  | -4935(3) | -3570(2) | 18(1)  |
| C(2)  | 471(4)   | -5305(4) | -3577(2) | 20(1)  |
| C(3)  | -754(4)  | -5087(3) | -4056(2) | 21(1)  |
| C(4)  | -737(4)  | -4417(3) | -4496(2) | 21(1)  |
| C(5)  | 447(4)   | -4012(3) | -4482(2) | 20(1)  |
| C(6)  | 1650(4)  | -4260(3) | -4021(2) | 19(1)  |
| C(7)  | 2921(4)  | -3872(3) | -3964(2) | 18(1)  |
| C(8)  | 3139(4)  | -3206(3) | -4340(2) | 20(1)  |
| C(9)  | 4402(4)  | -2900(3) | -4266(2) | 18(1)  |
| C(10) | 5428(4)  | -3308(3) | -3793(2) | 23(1)  |
| C(11) | 5158(4)  | -3970(3) | -3430(2) | 23(1)  |
| C(12) | -1866(5) | -6086(4) | -3526(2) | 31(1)  |
| C(13) | -3143(4) | -5159(4) | -4449(2) | 29(1)  |
| C(14) | 4631(5)  | -2171(3) | -4694(2) | 24(1)  |
| C(15) | 3890(6)  | -1384(4) | -4559(2) | 35(1)  |
| C(16) | 4078(5)  | -2415(4) | -5428(2) | 31(1)  |
| C(17) | 6088(5)  | -1951(4) | -4546(3) | 43(2)  |
| C(18) | 4428(5)  | -5110(3) | -1974(2) | 24(1)  |
| C(19) | 5286(5)  | -5688(4) | -2176(2) | 26(1)  |
| C(20) | 4559(5)  | -6421(4) | -2421(2) | 29(1)  |
| C(21) | 3240(5)  | -6318(4) | -2375(2) | 26(1)  |
| C(22) | 3187(5)  | -5520(3) | -2067(2) | 24(1)  |
| C(23) | 4865(6)  | -4293(4) | -1632(2) | 48(2)  |
| C(24) | 6728(5)  | -5573(5) | -2080(3) | 54(2)  |
| C(25) | 5046(7)  | -7194(4) | -2686(3) | 54(2)  |
| C(26) | 2192(6)  | -6993(4) | -2532(3) | 52(2)  |
| C(27) | 2081(6)  | -5215(4) | -1825(2) | 46(2)  |
| C(28) | -251(5)  | -2773(4) | -3688(2) | 30(1)  |
| C(29) | 1416(5)  | -3415(4) | -2746(2) | 26(1)  |
| C(30) | -924(4)  | -3963(3) | -3012(2) | 22(1)  |
| O(4)  | 505(5)   | -2609(4) | -548(3)  | 89(2)  |
| C(31) | -252(7)  | -3183(6) | -698(3)  | 58(2)  |
| C(32) | -1581(7) | -3141(6) | -630(4)  | 91(3)  |
| C(33) | 140(10)  | -3961(8) | -979(5)  | 149(5) |

U(eq) is defined as 1/3 the trace of the  $U_{ij}$  tensor.

Table 3. Bond lengths (Å) and angles (deg) for 5b

|                   |          |                   |          |
|-------------------|----------|-------------------|----------|
| Ir(1)–C(1)        | 2.046(4) | Ir(1)–N(1)        | 2.101(4) |
| Ir(1)–C(21)       | 2.150(5) | Ir(1)–C(22)       | 2.170(4) |
| Ir(1)–C(18)       | 2.171(4) | Ir(1)–C(20)       | 2.233(5) |
| Ir(1)–C(19)       | 2.257(4) | Ir(1)–Cl(1)       | 2.402(1) |
| Cr(1)–C(30)       | 1.815(5) | Cr(1)–C(28)       | 1.820(6) |
| Cr(1)–C(29)       | 1.823(5) | Cr(1)–C(5)        | 2.201(4) |
| Cr(1)–C(6)        | 2.224(4) | Cr(1)–C(4)        | 2.260(4) |
| Cr(1)–C(2)        | 2.305(5) | Cr(1)–C(1)        | 2.321(5) |
| Cr(1)–C(3)        | 2.359(5) | O(1)–C(28)        | 1.163(6) |
| O(2)–C(29)        | 1.165(5) | O(3)–C(30)        | 1.173(5) |
| N(1)–C(11)        | 1.333(5) | N(1)–C(7)         | 1.373(5) |
| N(2)–C(3)         | 1.366(6) | N(2)–C(13)        | 1.460(6) |
| N(2)–C(12)        | 1.460(6) | C(1)–C(2)         | 1.404(6) |
| C(1)–C(6)         | 1.427(6) | C(2)–C(3)         | 1.434(6) |
| C(2)–H(2)         | 0.9500   | C(3)–C(4)         | 1.411(6) |
| C(4)–C(5)         | 1.407(6) | C(4)–H(4)         | 0.9500   |
| C(5)–C(6)         | 1.413(6) | C(5)–H(5)         | 0.9500   |
| C(6)–C(7)         | 1.457(6) | C(7)–C(8)         | 1.380(6) |
| C(8)–C(9)         | 1.393(6) | C(8)–H(8)         | 0.9500   |
| C(9)–C(10)        | 1.400(6) | C(9)–C(14)        | 1.529(6) |
| C(10)–C(11)       | 1.377(7) | C(10)–H(10)       | 0.9500   |
| C(11)–H(11)       | 0.9500   | C(12)–H(12A)      | 0.9800   |
| C(12)–H(12B)      | 0.9800   | C(12)–H(12C)      | 0.9800   |
| C(13)–H(13A)      | 0.9800   | C(13)–H(13B)      | 0.9800   |
| C(13)–H(13C)      | 0.9800   | C(14)–C(17)       | 1.528(7) |
| C(14)–C(16)       | 1.535(6) | C(14)–C(15)       | 1.545(7) |
| C(15)–H(15A)      | 0.9800   | C(15)–H(15B)      | 0.9800   |
| C(15)–H(15C)      | 0.9800   | C(16)–H(16A)      | 0.9800   |
| C(16)–H(16B)      | 0.9800   | C(16)–H(16C)      | 0.9800   |
| C(17)–H(17A)      | 0.9800   | C(17)–H(17B)      | 0.9800   |
| C(17)–H(17C)      | 0.9800   | C(18)–C(22)       | 1.433(7) |
| C(18)–C(19)       | 1.444(7) | C(18)–C(23)       | 1.485(7) |
| C(19)–C(20)       | 1.404(7) | C(19)–C(24)       | 1.498(6) |
| C(20)–C(21)       | 1.446(7) | C(20)–C(25)       | 1.500(7) |
| C(21)–C(22)       | 1.428(7) | C(21)–C(26)       | 1.507(7) |
| C(22)–C(27)       | 1.498(6) | C(23)–H(23A)      | 0.9800   |
| C(23)–H(23B)      | 0.9800   | C(23)–H(23C)      | 0.9800   |
| C(24)–H(24A)      | 0.9800   | C(24)–H(24B)      | 0.9800   |
| C(24)–H(24C)      | 0.9800   | C(25)–H(25A)      | 0.9800   |
| C(25)–H(25B)      | 0.9800   | C(25)–H(25C)      | 0.9800   |
| C(26)–H(26A)      | 0.9800   | C(26)–H(26B)      | 0.9800   |
| C(26)–H(26C)      | 0.9800   | C(27)–H(27A)      | 0.9800   |
| C(27)–H(27B)      | 0.9800   | C(27)–H(27C)      | 0.9800   |
| O(4)–C(31)        | 1.19(1)  | C(31)–C(32)       | 1.47(1)  |
| C(31)–C(33)       | 1.48(1)  | C(32)–H(32A)      | 0.9800   |
| C(32)–H(32B)      | 0.9800   | C(32)–H(32C)      | 0.9800   |
| C(33)–H(33A)      | 0.9800   | C(33)–H(33B)      | 0.9800   |
| C(33)–H(33C)      | 0.9800   |                   |          |
| C(1)–Ir(1)–N(1)   | 78.1(2)  | C(1)–Ir(1)–C(21)  | 107.3(2) |
| N(1)–Ir(1)–C(21)  | 169.5(2) | C(1)–Ir(1)–C(22)  | 100.3(2) |
| N(1)–Ir(1)–C(22)  | 132.5(2) | C(21)–Ir(1)–C(22) | 38.6(2)  |
| C(1)–Ir(1)–C(18)  | 126.1(2) | N(1)–Ir(1)–C(18)  | 105.0(2) |
| C(21)–Ir(1)–C(18) | 64.6(2)  | C(22)–Ir(1)–C(18) | 38.5(2)  |
| C(1)–Ir(1)–C(20)  | 142.2(2) | N(1)–Ir(1)–C(20)  | 138.7(2) |
| C(21)–Ir(1)–C(20) | 38.5(2)  | C(22)–Ir(1)–C(20) | 63.5(2)  |
| C(18)–Ir(1)–C(20) | 62.9(2)  | C(1)–Ir(1)–C(19)  | 163.2(2) |
| N(1)–Ir(1)–C(19)  | 109.0(2) | C(21)–Ir(1)–C(19) | 63.4(2)  |
| C(22)–Ir(1)–C(19) | 63.5(2)  | C(18)–Ir(1)–C(19) | 38.0(2)  |
| C(20)–Ir(1)–C(19) | 36.4(2)  | C(1)–Ir(1)–Cl(1)  | 85.3(1)  |
| N(1)–Ir(1)–Cl(1)  | 83.7(1)  | C(21)–Ir(1)–Cl(1) | 105.4(2) |
| C(22)–Ir(1)–Cl(1) | 143.8(2) | C(18)–Ir(1)–Cl(1) | 148.3(1) |
| C(20)–Ir(1)–Cl(1) | 90.2(1)  | C(19)–Ir(1)–Cl(1) | 110.3(1) |

|                          |           |                          |           |
|--------------------------|-----------|--------------------------|-----------|
| C (30) –Cr (1) –C (28)   | 90.9 (2)  | C (30) –Cr (1) –C (29)   | 88.5 (2)  |
| C (28) –Cr (1) –C (29)   | 84.8 (2)  | C (30) –Cr (1) –C (5)    | 142.8 (2) |
| C (28) –Cr (1) –C (5)    | 88.6 (2)  | C (29) –Cr (1) –C (5)    | 128.5 (2) |
| C (30) –Cr (1) –C (6)    | 158.8 (2) | C (28) –Cr (1) –C (6)    | 109.6 (2) |
| C (29) –Cr (1) –C (6)    | 98.8 (2)  | C (5) –Cr (1) –C (6)     | 37.2 (2)  |
| C (30) –Cr (1) –C (4)    | 106.7 (2) | C (28) –Cr (1) –C (4)    | 97.0 (2)  |
| C (29) –Cr (1) –C (4)    | 164.7 (2) | C (5) –Cr (1) –C (4)     | 36.8 (2)  |
| C (6) –Cr (1) –C (4)     | 66.2 (2)  | C (30) –Cr (1) –C (2)    | 94.0 (2)  |
| C (28) –Cr (1) –C (2)    | 161.2 (2) | C (29) –Cr (1) –C (2)    | 113.4 (2) |
| C (5) –Cr (1) –C (2)     | 76.6 (2)  | C (6) –Cr (1) –C (2)     | 64.8 (2)  |
| C (4) –Cr (1) –C (2)     | 64.3 (2)  | C (30) –Cr (1) –C (1)    | 123.7 (2) |
| C (28) –Cr (1) –C (1)    | 145.4 (2) | C (29) –Cr (1) –C (1)    | 93.2 (2)  |
| C (5) –Cr (1) –C (1)     | 65.8 (2)  | C (6) –Cr (1) –C (1)     | 36.5 (2)  |
| C (4) –Cr (1) –C (1)     | 76.7 (2)  | C (2) –Cr (1) –C (1)     | 35.3 (2)  |
| C (30) –Cr (1) –C (3)    | 86.2 (2)  | C (28) –Cr (1) –C (3)    | 126.9 (2) |
| C (29) –Cr (1) –C (3)    | 147.9 (2) | C (5) –Cr (1) –C (3)     | 65.0 (2)  |
| C (6) –Cr (1) –C (3)     | 77.0 (2)  | C (4) –Cr (1) –C (3)     | 35.5 (2)  |
| C (2) –Cr (1) –C (3)     | 35.8 (2)  | C (1) –Cr (1) –C (3)     | 64.3 (2)  |
| C (11) –N (1) –C (7)     | 117.8 (4) | C (11) –N (1) –Ir (1)    | 124.8 (3) |
| C (7) –N (1) –Ir (1)     | 117.1 (3) | C (3) –N (2) –C (13)     | 118.7 (4) |
| C (3) –N (2) –C (12)     | 119.4 (4) | C (13) –N (2) –C (12)    | 117.4 (4) |
| C (2) –C (1) –C (6)      | 118.1 (4) | C (2) –C (1) –Ir (1)     | 126.2 (4) |
| C (6) –C (1) –Ir (1)     | 115.5 (3) | C (2) –C (1) –Cr (1)     | 71.7 (3)  |
| C (6) –C (1) –Cr (1)     | 68.1 (3)  | Ir (1) –C (1) –Cr (1)    | 135.8 (2) |
| C (1) –C (2) –C (3)      | 122.8 (4) | C (1) –C (2) –Cr (1)     | 72.9 (3)  |
| C (3) –C (2) –Cr (1)     | 74.1 (3)  | C (1) –C (2) –H (2)      | 118.6     |
| C (3) –C (2) –H (2)      | 118.6     | Cr (1) –C (2) –H (2)     | 126.3     |
| N (2) –C (3) –C (4)      | 122.7 (4) | N (2) –C (3) –C (2)      | 120.1 (4) |
| C (4) –C (3) –C (2)      | 117.2 (4) | N (2) –C (3) –Cr (1)     | 132.2 (3) |
| C (4) –C (3) –Cr (1)     | 68.4 (3)  | C (2) –C (3) –Cr (1)     | 70.1 (3)  |
| C (5) –C (4) –C (3)      | 121.0 (4) | C (5) –C (4) –Cr (1)     | 69.3 (2)  |
| C (3) –C (4) –Cr (1)     | 76.1 (3)  | C (5) –C (4) –H (4)      | 119.5     |
| C (3) –C (4) –H (4)      | 119.5     | Cr (1) –C (4) –H (4)     | 127.1     |
| C (4) –C (5) –C (6)      | 120.7 (4) | C (4) –C (5) –Cr (1)     | 73.9 (2)  |
| C (6) –C (5) –Cr (1)     | 72.3 (2)  | C (4) –C (5) –H (5)      | 119.7     |
| C (6) –C (5) –H (5)      | 119.7     | Cr (1) –C (5) –H (5)     | 126.0     |
| C (5) –C (6) –C (1)      | 120.0 (4) | C (5) –C (6) –C (7)      | 124.6 (4) |
| C (1) –C (6) –C (7)      | 115.4 (4) | C (5) –C (6) –Cr (1)     | 70.5 (2)  |
| C (1) –C (6) –Cr (1)     | 75.4 (2)  | C (7) –C (6) –Cr (1)     | 126.2 (3) |
| N (1) –C (7) –C (8)      | 120.9 (4) | N (1) –C (7) –C (6)      | 113.2 (4) |
| C (8) –C (7) –C (6)      | 125.9 (4) | C (7) –C (8) –C (9)      | 121.6 (4) |
| C (7) –C (8) –H (8)      | 119.2     | C (9) –C (8) –H (8)      | 119.2     |
| C (8) –C (9) –C (10)     | 116.1 (4) | C (8) –C (9) –C (14)     | 121.0 (4) |
| C (10) –C (9) –C (14)    | 122.8 (4) | C (11) –C (10) –C (9)    | 120.0 (4) |
| C (11) –C (10) –H (10)   | 120.0     | C (9) –C (10) –H (10)    | 120.0     |
| N (1) –C (11) –C (10)    | 123.6 (4) | N (1) –C (11) –H (11)    | 118.2     |
| C (10) –C (11) –H (11)   | 118.2     | N (2) –C (12) –H (12A)   | 109.5     |
| N (2) –C (12) –H (12B)   | 109.5     | H (12A) –C (12) –H (12B) | 109.5     |
| N (2) –C (12) –H (12C)   | 109.5     | H (12A) –C (12) –H (12C) | 109.5     |
| H (12B) –C (12) –H (12C) | 109.5     | N (2) –C (13) –H (13A)   | 109.5     |
| N (2) –C (13) –H (13B)   | 109.5     | H (13A) –C (13) –H (13B) | 109.5     |
| N (2) –C (13) –H (13C)   | 109.5     | H (13A) –C (13) –H (13C) | 109.5     |
| H (13B) –C (13) –H (13C) | 109.5     | C (17) –C (14) –C (9)    | 112.4 (4) |
| C (17) –C (14) –C (16)   | 108.9 (4) | C (9) –C (14) –C (16)    | 109.1 (4) |
| C (17) –C (14) –C (15)   | 108.8 (5) | C (9) –C (14) –C (15)    | 108.5 (4) |
| C (16) –C (14) –C (15)   | 109.1 (4) | C (14) –C (15) –H (15A)  | 109.5     |
| C (14) –C (15) –H (15B)  | 109.5     | H (15A) –C (15) –H (15B) | 109.5     |
| C (14) –C (15) –H (15C)  | 109.5     | H (15A) –C (15) –H (15C) | 109.5     |
| H (15B) –C (15) –H (15C) | 109.5     | C (14) –C (16) –H (16A)  | 109.5     |
| C (14) –C (16) –H (16B)  | 109.5     | H (16A) –C (16) –H (16B) | 109.5     |
| C (14) –C (16) –H (16C)  | 109.5     | H (16A) –C (16) –H (16C) | 109.5     |
| H (16B) –C (16) –H (16C) | 109.5     | C (14) –C (17) –H (17A)  | 109.5     |
| C (14) –C (17) –H (17B)  | 109.5     | H (17A) –C (17) –H (17B) | 109.5     |
| C (14) –C (17) –H (17C)  | 109.5     | H (17A) –C (17) –H (17C) | 109.5     |
| H (17B) –C (17) –H (17C) | 109.5     | C (22) –C (18) –C (19)   | 108.2 (5) |
| C (22) –C (18) –C (23)   | 127.0 (5) | C (19) –C (18) –C (23)   | 124.1 (5) |
| C (22) –C (18) –Ir (1)   | 70.7 (2)  | C (19) –C (18) –Ir (1)   | 74.2 (3)  |

|                          |           |                          |           |
|--------------------------|-----------|--------------------------|-----------|
| C (23) –C (18) –Ir (1)   | 128.3 (4) | C (20) –C (19) –C (18)   | 107.7 (4) |
| C (20) –C (19) –C (24)   | 125.4 (5) | C (18) –C (19) –C (24)   | 126.6 (6) |
| C (20) –C (19) –Ir (1)   | 70.9 (3)  | C (18) –C (19) –Ir (1)   | 67.8 (2)  |
| C (24) –C (19) –Ir (1)   | 131.4 (3) | C (19) –C (20) –C (21)   | 108.8 (5) |
| C (19) –C (20) –C (25)   | 126.6 (5) | C (21) –C (20) –C (25)   | 124.6 (6) |
| C (19) –C (20) –Ir (1)   | 72.7 (3)  | C (21) –C (20) –Ir (1)   | 67.6 (3)  |
| C (25) –C (20) –Ir (1)   | 125.7 (3) | C (22) –C (21) –C (20)   | 107.6 (4) |
| C (22) –C (21) –C (26)   | 126.7 (5) | C (20) –C (21) –C (26)   | 125.1 (6) |
| C (22) –C (21) –Ir (1)   | 71.5 (3)  | C (20) –C (21) –Ir (1)   | 73.9 (3)  |
| C (26) –C (21) –Ir (1)   | 126.9 (3) | C (21) –C (22) –C (18)   | 107.6 (4) |
| C (21) –C (22) –C (27)   | 125.6 (5) | C (18) –C (22) –C (27)   | 126.5 (5) |
| C (21) –C (22) –Ir (1)   | 69.9 (2)  | C (18) –C (22) –Ir (1)   | 70.8 (2)  |
| C (27) –C (22) –Ir (1)   | 129.3 (3) | C (18) –C (23) –H (23A)  | 109.5     |
| C (18) –C (23) –H (23B)  | 109.5     | H (23A) –C (23) –H (23B) | 109.5     |
| C (18) –C (23) –H (23C)  | 109.5     | H (23A) –C (23) –H (23C) | 109.5     |
| H (23B) –C (23) –H (23C) | 109.5     | C (19) –C (24) –H (24A)  | 109.5     |
| C (19) –C (24) –H (24B)  | 109.5     | H (24A) –C (24) –H (24B) | 109.5     |
| C (19) –C (24) –H (24C)  | 109.5     | H (24A) –C (24) –H (24C) | 109.5     |
| H (24B) –C (24) –H (24C) | 109.5     | C (20) –C (25) –H (25A)  | 109.5     |
| C (20) –C (25) –H (25B)  | 109.5     | H (25A) –C (25) –H (25B) | 109.5     |
| C (20) –C (25) –H (25C)  | 109.5     | H (25A) –C (25) –H (25C) | 109.5     |
| H (25B) –C (25) –H (25C) | 109.5     | C (21) –C (26) –H (26A)  | 109.5     |
| C (21) –C (26) –H (26B)  | 109.5     | H (26A) –C (26) –H (26B) | 109.5     |
| C (21) –C (26) –H (26C)  | 109.5     | H (26A) –C (26) –H (26C) | 109.5     |
| H (26B) –C (26) –H (26C) | 109.5     | C (22) –C (27) –H (27A)  | 109.5     |
| C (22) –C (27) –H (27B)  | 109.5     | H (27A) –C (27) –H (27B) | 109.5     |
| C (22) –C (27) –H (27C)  | 109.5     | H (27A) –C (27) –H (27C) | 109.5     |
| H (27B) –C (27) –H (27C) | 109.5     | O (1) –C (28) –Cr (1)    | 178.0 (5) |
| O (2) –C (29) –Cr (1)    | 175.0 (5) | O (3) –C (30) –Cr (1)    | 178.3 (4) |
| O (4) –C (31) –C (32)    | 122.4 (8) | O (4) –C (31) –C (33)    | 119.2 (7) |
| C (32) –C (31) –C (33)   | 118.4 (8) | C (31) –C (32) –H (32A)  | 109.5     |
| C (31) –C (32) –H (32B)  | 109.5     | H (32A) –C (32) –H (32B) | 109.5     |
| C (31) –C (32) –H (32C)  | 109.5     | H (32A) –C (32) –H (32C) | 109.5     |
| H (32B) –C (32) –H (32C) | 109.5     | C (31) –C (33) –H (33A)  | 109.5     |
| C (31) –C (33) –H (33B)  | 109.5     | H (33A) –C (33) –H (33B) | 109.5     |
| C (31) –C (33) –H (33C)  | 109.5     | H (33A) –C (33) –H (33C) | 109.5     |
| H (33B) –C (33) –H (33C) | 109.5     |                          |           |

Table 4. Anisotropic displacement parameters ( $\text{\AA}^2 \times 10^3$ ) for 5b

| atom  | U11   | U22     | U33     | U23      | U13   | U12    |
|-------|-------|---------|---------|----------|-------|--------|
| Ir(1) | 19(1) | 15(1)   | 18(1)   | 1(1)     | 9(1)  | 1(1)   |
| Cr(1) | 16(1) | 19(1)   | 23(1)   | -1(1)    | 8(1)  | 0(1)   |
| Cl(1) | 33(1) | 27(1)   | 24(1)   | -4(1)    | 12(1) | 5(1)   |
| O(1)  | 62(3) | 24(3)   | 64(3)   | 7(2)     | 23(2) | 12(2)  |
| O(2)  | 32(2) | 47(3)   | 44(2)   | -14(2)   | 0(2)  | -6(2)  |
| O(3)  | 32(2) | 35(3)   | 48(2)   | 1(2)     | 28(2) | -1(2)  |
| N(1)  | 18(2) | 19(3)   | 20(2)   | 2(2)     | 9(2)  | -1(2)  |
| N(2)  | 23(2) | 27(3)   | 26(2)   | -2(2)    | 10(2) | -8(2)  |
| C(1)  | 22(2) | 16(3)   | 17(2)   | -4(2)    | 10(2) | 1(2)   |
| C(2)  | 23(2) | 16(3)   | 24(2)   | -5(2)    | 12(2) | -2(2)  |
| C(3)  | 24(2) | 23(3)   | 18(2)   | -6(2)    | 12(2) | -2(2)  |
| C(4)  | 18(2) | 24(3)   | 21(2)   | -2(2)    | 7(2)  | -2(2)  |
| C(5)  | 20(2) | 22(3)   | 20(2)   | -2(2)    | 9(2)  | 0(2)   |
| C(6)  | 19(2) | 18(3)   | 22(2)   | -2(2)    | 10(2) | -3(2)  |
| C(7)  | 21(2) | 20(3)   | 17(2)   | 0(2)     | 12(2) | 3(2)   |
| C(8)  | 16(2) | 27(3)   | 19(2)   | 1(2)     | 7(2)  | 0(2)   |
| C(9)  | 22(2) | 19(3)   | 15(2)   | -2(2)    | 9(2)  | -2(2)  |
| C(10) | 18(2) | 28(3)   | 25(2)   | -2(2)    | 9(2)  | -7(2)  |
| C(11) | 20(2) | 26(3)   | 24(2)   | 2(2)     | 7(2)  | -1(2)  |
| C(12) | 33(3) | 31(4)   | 31(3)   | -6(2)    | 12(2) | -16(3) |
| C(13) | 23(3) | 29(4)   | 38(3)   | -5(2)    | 11(2) | -5(2)  |
| C(14) | 28(3) | 23(3)   | 21(2)   | -1(2)    | 8(2)  | -4(2)  |
| C(15) | 57(4) | 22(4)   | 28(3)   | 1(2)     | 16(2) | -9(3)  |
| C(16) | 41(3) | 28(4)   | 25(3)   | 1(2)     | 15(2) | -5(3)  |
| C(17) | 40(3) | 45(5)   | 43(3)   | 12(3)    | 10(3) | -15(3) |
| C(18) | 34(3) | 25(3)   | 13(2)   | 3(2)     | 6(2)  | 2(2)   |
| C(19) | 21(3) | 37(4)   | 21(2)   | 13(2)    | 8(2)  | 3(2)   |
| C(20) | 45(3) | 24(3)   | 20(2)   | 7(2)     | 15(2) | 17(3)  |
| C(21) | 34(3) | 26(3)   | 17(2)   | 7(2)     | 5(2)  | -5(2)  |
| C(22) | 32(3) | 23(4)   | 23(2)   | 6(2)     | 17(2) | 9(2)   |
| C(23) | 73(5) | 33(4)   | 25(3)   | -2(2)    | -7(3) | -5(3)  |
| C(24) | 31(3) | 91(7)   | 39(3)   | 35(3)    | 8(2)  | -1(3)  |
| C(25) | 85(5) | 37(5)   | 49(4)   | 7(3)     | 35(3) | 33(4)  |
| C(26) | 58(4) | 31(4)   | 55(4)   | 16(3)    | -2(3) | -21(3) |
| C(27) | 53(4) | 60(5)   | 38(3)   | 17(3)    | 33(3) | 23(4)  |
| C(28) | 35(3) | 23(4)   | 33(3)   | 3(2)     | 13(2) | 5(3)   |
| C(29) | 22(3) | 25(3)   | 33(3)   | 0(2)     | 11(2) | -1(2)  |
| C(30) | 19(2) | 20(3)   | 26(2)   | -4(2)    | 4(2)  | -3(2)  |
| O(4)  | 54(3) | 117(6)  | 100(4)  | -53(4)   | 27(3) | -25(4) |
| C(31) | 42(4) | 89(7)   | 41(4)   | -30(4)   | 7(3)  | -3(4)  |
| C(32) | 54(5) | 120(10) | 104(6)  | -20(6)   | 37(4) | -7(5)  |
| C(33) | 96(8) | 160(10) | 190(10) | -120(10) | 29(7) | 10(8)  |

The anisotropic displacement factor exponent takes the form  
 $2 \pi^2 [h^2 a^{*2} U(11) + \dots + 2 h k a^* b^* U(12)]$

Table 5. Hydrogen Coordinates ( $\text{\AA} \times 10^4$ ) and equivalent isotropic displacement parameters ( $\text{\AA}^2 \times 10^3$ ) for 5b

| atom   | x          | y          | z          | U(eq) |
|--------|------------|------------|------------|-------|
| H(2)   | 469        | -5718      | -3251      | 24    |
| H(4)   | -1538      | -4238      | -4805      | 25    |
| H(5)   | 438        | -3568      | -4786      | 24    |
| H(8)   | 2411       | -2949      | -4655      | 24    |
| H(10)  | 6311       | -3129      | -3721      | 28    |
| H(11)  | 5874       | -4236      | -3113      | 28    |
| H(12A) | -1259      | -6555      | -3517      | 47    |
| H(12B) | -2754.0002 | -6310      | -3591.0002 | 47    |
| H(12C) | -1579      | -5779      | -3104      | 47    |
| H(13A) | -3215      | -4577      | -4304      | 44    |
| H(13B) | -3856      | -5501.0005 | -4377      | 44    |
| H(13C) | -3210      | -5161      | -4922      | 44    |
| H(15A) | 4246       | -1221      | -4092.0002 | 53    |
| H(15B) | 2952       | -1516      | -4658      | 53    |
| H(15C) | 4003       | -916       | -4841      | 53    |
| H(16A) | 4201       | -1944      | -5705      | 46    |
| H(16B) | 3138       | -2542      | -5531      | 46    |
| H(16C) | 4543       | -2915      | -5517      | 46    |
| H(17A) | 6450       | -1797      | -4077      | 65    |
| H(17B) | 6184       | -1474.0001 | -4823      | 65    |
| H(17C) | 6563       | -2442      | -4641      | 65    |
| H(23A) | 4099       | -3930      | -1675      | 72    |
| H(23B) | 5472       | -4013.0002 | -1834      | 72    |
| H(23C) | 5314       | -4399      | -1162      | 72    |
| H(24A) | 7230       | -5797      | -1646      | 82    |
| H(24B) | 6922       | -4970      | -2103      | 82    |
| H(24C) | 6975       | -5878.0005 | -2429      | 82    |
| H(25A) | 5703       | -7028      | -2903      | 81    |
| H(25B) | 4306       | -7474      | -3009.0002 | 81    |
| H(25C) | 5445       | -7583      | -2321      | 81    |
| H(26A) | 1401       | -6777      | -2442      | 79    |
| H(26B) | 2515       | -7492      | -2256      | 79    |
| H(26C) | 1980       | -7149      | -3001      | 79    |
| H(27A) | 2105       | -5511      | -1414      | 69    |
| H(27B) | 1240       | -5329      | -2162      | 69    |
| H(27C) | 2173       | -4605      | -1740      | 69    |
| H(32A) | -1593      | -3425      | -220       | 136   |
| H(32B) | -2201      | -3422      | -1010.0001 | 136   |
| H(32C) | -1838      | -2548      | -616       | 136   |
| H(33A) | -464       | -4063      | -1421.9999 | 223   |
| H(33B) | 121        | -4443      | -691       | 223   |
| H(33C) | 1039       | -3892      | -1009      | 223   |

## Computational details

### Theoretical and Computational details.

Geometry optimization and ground singlet state electronic structure determination were performed by using the methods of the Density Functional Theory (DFT). The *Becke*<sup>3</sup>-*Perdew*<sup>4, 5</sup> (BP86) and the *Perdew-Burke-Ernzerhof*<sup>6</sup> (PBE) GGA functionals as well as the *Tao-Perdew-Staroverov-Scuseria* (TPSS) metaGGA functional<sup>7</sup> implemented in the *Amsterdam Density Functional* package<sup>8, 9</sup> (abbr. *ADF*, version 2009.01) were used. Opposed to a similar functional that is typically termed BP86, the implementation in ADF employs the *Vosko-Wilk-Nusair* parametrization for the LDA correlation energy part.<sup>10</sup> The PBE functional in ADF200 employs the PW92 parametrization of the LDA correlation energy part. In calculations carried out with the ADF package, scalar relativistic effects were treated within the *Zeroth Order Regular Approximation* (ZORA).<sup>11, 12</sup> As a consequence, in all cases *ad hoc* all-electron TZP (ZORA for Ir, Ru, Cr) and DZP (ZORA for remaining main group elements) basis sets were used.<sup>13</sup> Geometry optimizations by energy gradient minimization were carried out in all cases without symmetry constraint. Integration grid accuracy spanned 5 to 6, energy gradient convergence criterion was set to  $10^{-3}$  au and tight SCF convergence criteria ( $10^{-7}$  au) was used. Wiberg bond indices for ADF-optimized geometries (using all electron TZP basis sets) were computed with the GENNBO 5.0 extension of ADF<sup>14</sup>. Representations of molecular structures and orbitals were drawn using *ADFview* v09. Solvation by acetone was accounted for using the COSMO<sup>15-17</sup> procedure with Klamt's values of van der Waals radii for atoms. Thermodynamic data were computed from the statistical data, namely internal energy and entropy, generated by vibrational frequency calculations. The latter were computed by analytical integration and by two point numerical differentiation for geometries optimized respectively in the gas phase and in acetonitrile (COSMO).<sup>8</sup>

**Coulomb potential maps for the following models drawn over the SCF electron density isosurface**

III, charge 2+ (0.035 e/bohr<sup>3</sup>)

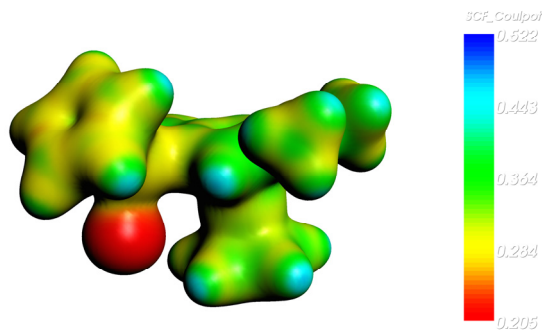

IV, charge 1+ (0.025 e/bohr<sup>3</sup>)

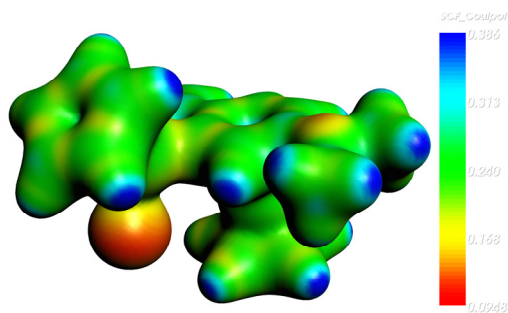

V, neutral (0.025 e/bohr<sup>3</sup>)

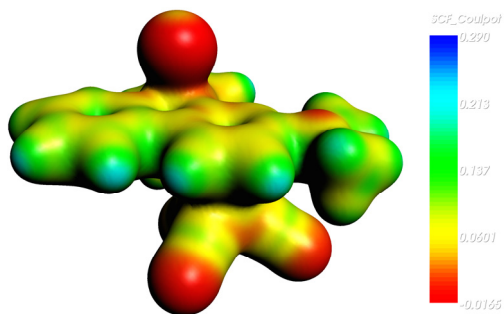

# Dimethylaniline at TPSS/TZP

Geometry CYCLE 2

Energy gradients wrt nuclear displacements

| Atom | Cartesian (a.u./angstrom) |           |           |
|------|---------------------------|-----------|-----------|
|      | X                         | Y         | Z         |
| 1 C  | 0.000061                  | 0.000034  | 0.000063  |
| 2 C  | 0.000017                  | 0.000234  | -0.000011 |
| 3 C  | -0.000031                 | 0.000230  | 0.000129  |
| 4 C  | -0.000024                 | 0.000117  | 0.000512  |
| 5 C  | 0.000003                  | -0.000273 | 0.000358  |
| 6 C  | 0.000020                  | -0.000265 | -0.000526 |
| 7 H  | 0.000052                  | -0.000123 | 0.000025  |
| 8 H  | -0.000012                 | -0.000059 | 0.000085  |
| 9 H  | -0.000008                 | -0.000016 | 0.000047  |
| 10 H | 0.000028                  | 0.000052  | -0.000045 |
| 11 H | -0.000002                 | -0.000081 | 0.000323  |
| 12 N | -0.000071                 | -0.000011 | -0.000357 |
| 13 C | -0.000025                 | 0.000157  | -0.000022 |
| 14 H | 0.000030                  | -0.000057 | 0.000036  |
| 15 H | 0.000014                  | 0.000143  | -0.000263 |
| 16 H | 0.000013                  | 0.000048  | 0.000066  |
| 17 C | -0.000027                 | -0.000164 | -0.000568 |
| 18 H | -0.000019                 | -0.000129 | 0.000084  |
| 19 H | -0.000062                 | 0.000101  | 0.000062  |
| 20 H | 0.000043                  | 0.000060  | 0.000000  |

Geometry Convergence after Step 2

|                          |            |                     |   |
|--------------------------|------------|---------------------|---|
| current energy           |            | -4.46173895 Hartree |   |
| abs of energy change     | 0.00085923 | 0.00100000          | T |
| constrained gradient max | 0.00056789 | 0.00100000          | T |
| constrained gradient rms | 0.00017157 | 0.00066667          | T |
| gradient max             | 0.00056789 |                     |   |
| gradient rms             | 0.00017157 |                     |   |
| cart. step max           | 0.00472343 | 0.01000000          | T |
| cart. step rms           | 0.00134636 | 0.00666667          | T |

Summary of Bonding Energy (energy terms are taken from the energy decomposition above)

|                                 |                    |           |          |           |
|---------------------------------|--------------------|-----------|----------|-----------|
| Electrostatic Energy:           | -3.343971421350849 | -90.9941  | -2098.37 | -8779.60  |
| Kinetic Energy:                 | 4.089879086778282  | 111.2913  | 2566.44  | 10737.98  |
| Coulomb (Steric+OrbInt) Energy: | -1.120168257182293 | -30.4813  | -702.92  | -2941.00  |
| XC Energy:                      | -4.087476743146226 | -111.2259 | -2564.93 | -10731.67 |
| Total Bonding Energy:           | -4.461737334901086 | -121.4101 | -2799.78 | -11714.29 |

List of All Frequencies:

Intensities

| Frequency<br>cm-1 | Dipole Strength<br>1e-40 esu2 cm2 | Absorption<br>km/mole | Intensity (degeneracy not counted) |
|-------------------|-----------------------------------|-----------------------|------------------------------------|
| 71.170682         | 0.539450                          | 0.009623              |                                    |
| 125.433169        | 235.608254                        | 7.407659              |                                    |
| 165.169300        | 87.304780                         | 3.614477              |                                    |
| 177.130409        | 0.153834                          | 0.006830              |                                    |
| 274.913468        | 106.568606                        | 7.343505              |                                    |
| 277.732443        | 4.035233                          | 0.280914              |                                    |
| 393.924809        | 8.698585                          | 0.858895              |                                    |
| 411.713420        | 0.745933                          | 0.076979              |                                    |
| 458.950062        | 39.306253                         | 4.521735              |                                    |
| 503.808753        | 89.526283                         | 11.305619             |                                    |
| 535.707394        | 10.818507                         | 1.452690              |                                    |
| 618.989182        | 0.103309                          | 0.016029              |                                    |
| 687.767916        | 115.121357                        | 19.846132             |                                    |
| 737.366324        | 60.964055                         | 11.267698             |                                    |
| 744.243867        | 193.015856                        | 36.006949             |                                    |
| 802.264469        | 0.005660                          | 0.001138              |                                    |
| 855.365551        | 10.091364                         | 2.163614              |                                    |
| 938.509513        | 59.796860                         | 14.066794             |                                    |
| 950.819163        | 0.144739                          | 0.034496              |                                    |
| 968.782400        | 0.479368                          | 0.116405              |                                    |
| 990.732566        | 56.346127                         | 13.992605             |                                    |
| 1037.348063       | 36.613590                         | 9.520174              |                                    |
| 1057.231174       | 67.975064                         | 18.013481             |                                    |
| 1093.751290       | 3.861965                          | 1.058778              |                                    |
| 1111.696424       | 5.826501                          | 1.623574              |                                    |
| 1130.507282       | 207.862014                        | 58.901529             |                                    |
| 1165.323242       | 3.871461                          | 1.130835              |                                    |
| 1171.656701       | 50.926673                         | 14.956286             |                                    |
| 1197.210463       | 33.624254                         | 10.090234             |                                    |
| 1230.244559       | 94.364842                         | 29.099112             |                                    |
| 1335.536258       | 436.179224                        | 146.015422            |                                    |
| 1337.923208       | 1.164839                          | 0.390639              |                                    |

Supplementary Material (ESI) for Chemical Communications  
This journal is (c) The Royal Society of Chemistry 2011

|             |            |            |
|-------------|------------|------------|
| 1352.025998 | 16.752875  | 5.677439   |
| 1431.132647 | 3.597788   | 1.290606   |
| 1466.317808 | 8.661951   | 3.183625   |
| 1467.160875 | 30.004734  | 11.034320  |
| 1486.238686 | 10.958496  | 4.082419   |
| 1490.447034 | 53.964032  | 20.160394  |
| 1509.028106 | 10.878394  | 4.114719   |
| 1516.411329 | 58.134711  | 22.096862  |
| 1526.395986 | 199.038277 | 76.152101  |
| 1581.298098 | 19.560849  | 7.753174   |
| 1615.888314 | 289.047110 | 117.073349 |
| 2924.345177 | 91.001587  | 66.704583  |
| 2932.536364 | 145.792591 | 107.165977 |
| 3029.810080 | 32.768020  | 24.885346  |
| 3031.880659 | 41.643051  | 31.647013  |
| 3076.779073 | 4.167205   | 3.213803   |
| 3084.360893 | 46.170352  | 35.694922  |
| 3112.744244 | 4.422184   | 3.450312   |
| 3120.059620 | 13.423257  | 10.497814  |
| 3143.571790 | 28.845712  | 22.729125  |
| 3156.985146 | 11.884645  | 9.404524   |
| 3161.321618 | 0.235452   | 0.186573   |

| Temp   |                                             | Transl | Rotat  | Vibrat  | Total   |
|--------|---------------------------------------------|--------|--------|---------|---------|
| ----   |                                             | -----  | -----  | -----   | -----   |
| 298.15 | Entropy (cal/mole-K):                       | 40.288 | 28.798 | 21.756  | 90.842  |
|        | Internal Energy (Kcal/mole):                | 0.889  | 0.889  | 110.624 | 112.401 |
|        | Constant Volume Heat Capacity (cal/mole-K): | 2.981  | 2.981  | 27.451  | 33.412  |

# TS-dimethylaniline at TPSS

Geometry CYCLE 11

Energy gradients wrt nuclear displacements

| Atom | Cartesian (a.u./angstrom) |           |           |
|------|---------------------------|-----------|-----------|
|      | X                         | Y         | Z         |
| 1 C  | -0.000007                 | 0.000306  | 0.000050  |
| 2 C  | -0.000181                 | 0.000050  | -0.000075 |
| 3 C  | 0.000023                  | 0.000061  | 0.000065  |
| 4 C  | -0.000179                 | 0.000062  | -0.000008 |
| 5 C  | 0.000575                  | -0.000008 | -0.000201 |
| 6 C  | -0.000332                 | -0.000463 | 0.000360  |
| 7 H  | -0.000143                 | 0.000032  | -0.000097 |
| 8 H  | 0.000129                  | -0.000012 | 0.000054  |
| 9 H  | -0.000085                 | -0.000003 | -0.000128 |
| 10 H | 0.000015                  | -0.000058 | 0.000108  |
| 11 H | -0.000040                 | 0.000201  | -0.000126 |
| 12 N | 0.000627                  | 0.000548  | 0.000381  |
| 13 C | -0.000213                 | -0.000632 | -0.000346 |
| 14 H | 0.000071                  | -0.000079 | 0.000132  |
| 15 H | -0.000183                 | 0.000257  | -0.000242 |
| 16 H | 0.000013                  | -0.000048 | 0.000061  |
| 17 C | -0.000224                 | -0.000562 | -0.000323 |
| 18 H | -0.000026                 | -0.000022 | 0.000431  |
| 19 H | 0.000265                  | 0.000049  | 0.000114  |
| 20 H | -0.000104                 | 0.000320  | -0.000210 |

Geometry Convergence after Step 11

|                          |                         |
|--------------------------|-------------------------|
| current energy           | -4.45630430 Hartree     |
| abs of energy change     | 0.00001941 0.00100000 T |
| constrained gradient max | 0.00063171 0.00100000 T |
| constrained gradient rms | 0.00024662 0.00066667 T |
| gradient max             | 0.00063171              |
| gradient rms             | 0.00024662              |
| cart. step max           | 0.00665736 0.01000000 T |
| cart. step rms           | 0.00206888 0.00666667 T |

Summary of Bonding Energy (energy terms are taken from the energy decomposition above)

|                                 |                    |           |          |           |
|---------------------------------|--------------------|-----------|----------|-----------|
| Electrostatic Energy:           | -3.295092313594319 | -89.6640  | -2067.70 | -8651.26  |
| Kinetic Energy:                 | 4.083285281999387  | 111.1118  | 2562.30  | 10720.66  |
| Coulomb (Steric+OrbInt) Energy: | -1.185039709411491 | -32.2466  | -743.62  | -3111.32  |
| XC Energy:                      | -4.059456109426393 | -110.4634 | -2547.35 | -10658.10 |
| Total Bonding Energy:           | -4.456302850432816 | -121.2622 | -2796.37 | -11700.02 |

List of All Frequencies:

Intensities

| Frequency<br>cm-1 | Dipole Strength<br>1e-40 esu2 cm2 | Absorption Intensity (degeneracy not counted)<br>km/mole |
|-------------------|-----------------------------------|----------------------------------------------------------|
| -56.847230        | 19.848424                         | -0.282822                                                |
| 129.137959        | 17.627052                         | 0.570574                                                 |
| 189.630191        | 24.107891                         | 1.145895                                                 |
| 243.455355        | 2.659260                          | 0.162277                                                 |
| 250.756399        | 10.145588                         | 0.637687                                                 |
| 317.820701        | 1.532537                          | 0.122088                                                 |
| 322.456958        | 1.992864                          | 0.161075                                                 |
| 409.041648        | 0.277914                          | 0.028494                                                 |
| 440.992967        | 18.592868                         | 2.055210                                                 |
| 523.195355        | 35.266588                         | 4.624932                                                 |
| 548.198649        | 108.765862                        | 14.945438                                                |
| 616.826631        | 0.040219                          | 0.006218                                                 |
| 697.700282        | 176.261291                        | 30.825059                                                |
| 740.575061        | 23.665585                         | 4.393032                                                 |
| 773.163438        | 70.395533                         | 13.642516                                                |
| 838.102630        | 0.680510                          | 0.142958                                                 |
| 915.781551        | 0.220049                          | 0.050511                                                 |
| 926.249029        | 120.706259                        | 28.024355                                                |
| 969.075050        | 0.195831                          | 0.047568                                                 |
| 985.547135        | 0.083201                          | 0.020553                                                 |
| 1004.063245       | 1.062102                          | 0.267304                                                 |
| 1027.797666       | 29.005467                         | 7.472494                                                 |
| 1032.999534       | 54.234623                         | 14.042836                                                |
| 1074.374606       | 23.360891                         | 6.291051                                                 |
| 1092.566906       | 31.018321                         | 8.494629                                                 |
| 1136.614487       | 103.779111                        | 29.566587                                                |
| 1159.617156       | 29.061148                         | 8.447058                                                 |
| 1163.711871       | 16.172791                         | 4.717463                                                 |
| 1175.042152       | 11.918078                         | 3.510247                                                 |
| 1181.937251       | 57.344775                         | 16.988942                                                |
| 1284.675368       | 55.169013                         | 17.765060                                                |

Supplementary Material (ESI) for Chemical Communications  
This journal is (c) The Royal Society of Chemistry 2011

|             |                                             |            |        |         |         |
|-------------|---------------------------------------------|------------|--------|---------|---------|
| 1305.305117 | 1.062117                                    | 0.347506   |        |         |         |
| 1331.017374 | 0.448348                                    | 0.149581   |        |         |         |
| 1423.636501 | 6.889056                                    | 2.458311   |        |         |         |
| 1450.214615 | 4.684715                                    | 1.702917   |        |         |         |
| 1456.810713 | 0.347466                                    | 0.126880   |        |         |         |
| 1480.083701 | 21.955603                                   | 8.145349   |        |         |         |
| 1492.778540 | 31.362244                                   | 11.734932  |        |         |         |
| 1494.161107 | 10.017287                                   | 3.751679   |        |         |         |
| 1498.893609 | 45.655833                                   | 17.153200  |        |         |         |
| 1511.429594 | 30.593570                                   | 11.590339  |        |         |         |
| 1589.896428 | 5.364372                                    | 2.137794   |        |         |         |
| 1604.130974 | 59.669807                                   | 23.992336  |        |         |         |
| 2883.999060 | 54.322057                                   | 39.268959  |        |         |         |
| 2892.051929 | 161.840677                                  | 117.319943 |        |         |         |
| 3015.697809 | 37.907073                                   | 28.654058  |        |         |         |
| 3018.305049 | 74.113564                                   | 56.071077  |        |         |         |
| 3076.455112 | 16.345395                                   | 12.604455  |        |         |         |
| 3078.378111 | 27.264551                                   | 21.037706  |        |         |         |
| 3107.703139 | 4.988822                                    | 3.886115   |        |         |         |
| 3117.362477 | 2.022152                                    | 1.580081   |        |         |         |
| 3126.402039 | 15.471591                                   | 12.124333  |        |         |         |
| 3137.443035 | 18.142348                                   | 14.267484  |        |         |         |
| 3148.416680 | 13.657833                                   | 10.778345  |        |         |         |
| Temp        |                                             | Transl     | Rotat  | Vibrat  | Total   |
| ----        |                                             | -----      | -----  | -----   | -----   |
| 298.15      | Entropy (cal/mole-K):                       | 40.288     | 28.780 | 16.911  | 85.979  |
|             | Internal Energy (Kcal/mole):                | 0.889      | 0.889  | 109.535 | 111.312 |
|             | Constant Volume Heat Capacity (cal/mole-K): | 2.981      | 2.981  | 25.377  | 31.339  |

# dimethylaniline BP86/TZP,DZP

Geometry CYCLE 7  
=====

Energy gradients wrt nuclear displacements  
=====

| Atom  | Cartesian (a.u./angstrom) |           |           |
|-------|---------------------------|-----------|-----------|
|       | X                         | Y         | Z         |
| ----- |                           |           |           |
| 1 C   | -0.000080                 | 0.000220  | -0.000044 |
| 2 C   | -0.000066                 | -0.000179 | -0.000005 |
| 3 C   | 0.000039                  | 0.000201  | -0.000035 |
| 4 C   | -0.000059                 | -0.000345 | -0.000015 |
| 5 C   | -0.000001                 | 0.000079  | 0.000060  |
| 6 C   | 0.000046                  | -0.000043 | 0.000131  |
| 7 H   | -0.000051                 | 0.000004  | -0.000002 |
| 8 H   | 0.000057                  | 0.000048  | 0.000079  |
| 9 H   | -0.000039                 | 0.000241  | -0.000015 |
| 10 H  | 0.000018                  | 0.000040  | -0.000036 |
| 11 H  | 0.000017                  | -0.000041 | -0.000129 |
| 12 N  | 0.000065                  | 0.000299  | -0.000118 |
| 13 C  | -0.000229                 | -0.000189 | 0.000502  |
| 14 H  | -0.000028                 | 0.000076  | -0.000092 |
| 15 H  | 0.000164                  | 0.000023  | 0.000086  |
| 16 H  | -0.000020                 | -0.000190 | -0.000097 |
| 17 C  | -0.000024                 | -0.000182 | -0.000225 |
| 18 H  | -0.000061                 | -0.000140 | 0.000066  |
| 19 H  | 0.000288                  | 0.000015  | -0.000137 |
| 20 H  | -0.000036                 | 0.000063  | 0.000026  |
| ----- |                           |           |           |

-----  
Geometry Convergence after Step 7  
-----

|                          |                     |            |   |
|--------------------------|---------------------|------------|---|
| current energy           | -4.35612063 Hartree |            |   |
| abs of energy change     | 0.00000111          | 0.00100000 | T |
| constrained gradient max | 0.00050201          | 0.00100000 | T |
| constrained gradient rms | 0.00013843          | 0.00066667 | T |
| gradient max             | 0.00050201          |            |   |
| gradient rms             | 0.00013843          |            |   |
| cart. step max           | 0.00472666          | 0.01000000 | T |
| cart. step rms           | 0.00160111          | 0.00666667 | T |

Summary of Bonding Energy (energy terms are taken from the energy decomposition above)  
=====

|                                 |                    |           |          |           |
|---------------------------------|--------------------|-----------|----------|-----------|
| Electrostatic Energy:           | -3.317534128118646 | -90.2747  | -2081.78 | -8710.18  |
| Kinetic Energy:                 | 4.050633218134081  | 110.2233  | 2541.81  | 10634.94  |
| Coulomb (Steric+OrbInt) Energy: | -1.140504850833189 | -31.0347  | -715.68  | -2994.40  |
| XC Energy:                      | -3.948704248737393 | -107.4497 | -2477.85 | -10367.32 |
| -----                           |                    |           |          |           |
| Total Bonding Energy:           | -4.356110009555146 | -118.5358 | -2733.50 | -11436.97 |

List of All Frequencies:

Intensities  
=====

| Frequency<br>cm-1 | Dipole Strength<br>1e-40 esu2 cm2 | Absorption Intensity (degeneracy not counted)<br>km/mole |
|-------------------|-----------------------------------|----------------------------------------------------------|
| -----             |                                   |                                                          |
| 87.094894         | 0.174279                          | 0.003805                                                 |
| 120.869054        | 318.720191                        | 9.656123                                                 |
| 158.131655        | 32.720133                         | 1.296916                                                 |
| 177.599785        | 0.456986                          | 0.020343                                                 |
| 268.936120        | 66.595159                         | 4.489209                                                 |
| 279.319801        | 2.815455                          | 0.197119                                                 |
| 394.570973        | 2.904976                          | 0.287307                                                 |
| 411.852010        | 0.704667                          | 0.072745                                                 |
| 461.867804        | 45.140397                         | 5.225900                                                 |
| 503.431775        | 105.229403                        | 13.278707                                                |
| 538.610365        | 6.725428                          | 0.907973                                                 |
| 615.993964        | 0.475445                          | 0.073410                                                 |
| 682.679284        | 169.171058                        | 28.948153                                                |
| 733.111289        | 235.282054                        | 43.235131                                                |
| 737.092458        | 14.208048                         | 2.625031                                                 |
| 786.428020        | 0.038240                          | 0.007538                                                 |
| 839.740634        | 14.097131                         | 2.967249                                                 |
| 930.150241        | 0.074848                          | 0.017451                                                 |
| 937.743187        | 47.518360                         | 11.169235                                                |
| 948.212221        | 1.573823                          | 0.374058                                                 |
| 977.883062        | 52.818336                         | 12.946421                                                |
| 1025.062092       | 48.331429                         | 12.418178                                                |
| 1046.389982       | 64.051693                         | 16.799728                                                |
| 1081.354891       | 5.668834                          | 1.536526                                                 |
| 1093.510823       | 3.318895                          | 0.909692                                                 |
| 1108.213408       | 145.139136                        | 40.316795                                                |
| 1150.955948       | 3.816765                          | 1.101114                                                 |
| 1153.425949       | 35.567773                         | 10.283109                                                |
| 1181.933495       | 37.553849                         | 11.125654                                                |
| 1227.689729       | 95.120654                         | 29.271267                                                |
| 1322.683295       | 10.343764                         | 3.429356                                                 |

Supplementary Material (ESI) for Chemical Communications  
This journal is (c) The Royal Society of Chemistry 2011

|             |            |            |
|-------------|------------|------------|
| 1326.799488 | 399.397713 | 132.827788 |
| 1337.606012 | 13.497116  | 4.525299   |
| 1399.294943 | 1.146820   | 0.402238   |
| 1435.571611 | 18.917577  | 6.807199   |
| 1440.874196 | 0.061111   | 0.022071   |
| 1444.569392 | 26.212891  | 9.491424   |
| 1449.009454 | 48.829556  | 17.735036  |
| 1470.606336 | 4.520426   | 1.666303   |
| 1484.782711 | 32.320239  | 12.028613  |
| 1496.011667 | 324.009985 | 121.498648 |
| 1559.860462 | 20.785592  | 8.126924   |
| 1598.044763 | 320.275199 | 128.289266 |
| 2881.417910 | 107.938675 | 77.958129  |
| 2889.445156 | 161.727454 | 117.132193 |
| 2986.744032 | 40.406310  | 30.249992  |
| 2988.164520 | 40.848403  | 30.595507  |
| 3043.489264 | 3.198451   | 2.439998   |
| 3049.959565 | 42.800822  | 32.720826  |
| 3087.124676 | 5.014602   | 3.880330   |
| 3092.686446 | 14.426387  | 11.183341  |
| 3114.657938 | 27.178309  | 21.218313  |
| 3124.018269 | 17.727860  | 13.881870  |
| 3128.616835 | 0.584468   | 0.458344   |

| Temp   |                                             | Transl | Rotat  | Vibrat  | Total   |
|--------|---------------------------------------------|--------|--------|---------|---------|
| ----   |                                             | -----  | -----  | -----   | -----   |
| 298.15 | Entropy (cal/mole-K):                       | 40.288 | 28.810 | 21.642  | 90.740  |
|        | Internal Energy (Kcal/mole):                | 0.889  | 0.889  | 109.267 | 111.045 |
|        | Constant Volume Heat Capacity (cal/mole-K): | 2.981  | 2.981  | 27.807  | 33.769  |

\*\*\*\*\*

# TS-dimethylaniline BP86/TZP,DZP

Geometry CYCLE 11

Energy gradients wrt nuclear displacements

| Atom | Cartesian (a.u./angstrom) |           |           |
|------|---------------------------|-----------|-----------|
|      | X                         | Y         | Z         |
| 1 C  | 0.000228                  | -0.000128 | -0.000340 |
| 2 C  | -0.000084                 | 0.000193  | -0.000126 |
| 3 C  | 0.000070                  | -0.000039 | -0.000062 |
| 4 C  | 0.000026                  | -0.000082 | 0.000052  |
| 5 C  | -0.000074                 | -0.000035 | -0.000065 |
| 6 C  | 0.000031                  | 0.000088  | 0.000124  |
| 7 H  | -0.000023                 | -0.000115 | 0.000103  |
| 8 H  | -0.000067                 | 0.000038  | 0.000062  |
| 9 H  | 0.000021                  | -0.000056 | 0.000060  |
| 10 H | 0.000006                  | 0.000047  | -0.000081 |
| 11 H | 0.000090                  | -0.000123 | 0.000031  |
| 12 N | -0.000678                 | -0.000640 | 0.000850  |
| 13 C | 0.000134                  | 0.000863  | -0.000856 |
| 14 H | -0.000153                 | -0.000184 | 0.000132  |
| 15 H | 0.000029                  | -0.000150 | 0.000188  |
| 16 H | 0.000154                  | -0.000083 | 0.000118  |
| 17 C | 0.000646                  | 0.000658  | 0.000116  |
| 18 H | -0.000137                 | -0.000049 | -0.000131 |
| 19 H | -0.000178                 | -0.000203 | -0.000192 |
| 20 H | -0.000041                 | 0.000002  | 0.000015  |

Geometry Convergence after Step 11

|                          |                         |
|--------------------------|-------------------------|
| current energy           | -4.34788809 Hartree     |
| abs of energy change     | 0.00000149 0.00100000 T |
| constrained gradient max | 0.00086327 0.00100000 T |
| constrained gradient rms | 0.00027850 0.00066667 T |
| gradient max             | 0.00086327              |
| gradient rms             | 0.00027850              |
| cart. step max           | 0.00978050 0.01000000 T |
| cart. step rms           | 0.00342448 0.00666667 T |

Summary of Bonding Energy (energy terms are taken from the energy decomposition above)

|                                 |                    |           |          |           |
|---------------------------------|--------------------|-----------|----------|-----------|
| Electrostatic Energy:           | -3.273078161609319 | -89.0650  | -2053.89 | -8593.47  |
| Kinetic Energy:                 | 4.031535746909071  | 109.7037  | 2529.83  | 10584.80  |
| Coulomb (Steric+OrbInt) Energy: | -1.184225312222722 | -32.2244  | -743.11  | -3109.18  |
| XC Energy:                      | -3.922120351292322 | -106.7263 | -2461.17 | -10297.53 |
| Total Bonding Energy:           | -4.347888078215292 | -118.3121 | -2728.34 | -11415.38 |

List of All Frequencies:

Intensities

| Frequency<br>cm-1 | Dipole Strength<br>1e-40 esu2 cm2 | Absorption<br>km/mole | Intensity (degeneracy not counted) |
|-------------------|-----------------------------------|-----------------------|------------------------------------|
| -59.540700        | 15.658033                         | -0.233684             |                                    |
| 134.535484        | 22.923724                         | 0.773037              |                                    |
| 194.529064        | 29.582437                         | 1.442436              |                                    |
| 247.961176        | 4.833085                          | 0.300390              |                                    |
| 257.344050        | 11.237694                         | 0.724885              |                                    |
| 322.712000        | 0.351087                          | 0.028399              |                                    |
| 327.045579        | 3.134272                          | 0.256935              |                                    |
| 406.560843        | 0.135373                          | 0.013795              |                                    |
| 445.040918        | 21.943660                         | 2.447863              |                                    |
| 525.912476        | 30.898197                         | 4.073096              |                                    |
| 546.532873        | 118.223504                        | 16.195643             |                                    |
| 613.907926        | 0.649524                          | 0.099949              |                                    |
| 691.709388        | 222.209883                        | 38.526993             |                                    |
| 740.080961        | 24.861957                         | 4.612035              |                                    |
| 765.460154        | 73.634166                         | 14.127979             |                                    |
| 821.055070        | 0.816000                          | 0.167935              |                                    |
| 899.419873        | 0.866041                          | 0.195245              |                                    |
| 925.790337        | 120.406288                        | 27.940867             |                                    |
| 949.237843        | 0.237061                          | 0.056404              |                                    |
| 965.909311        | 0.024564                          | 0.005947              |                                    |
| 992.013081        | 0.301578                          | 0.074989              |                                    |
| 1014.430498       | 36.358934                         | 9.245098              |                                    |
| 1023.637576       | 45.166128                         | 11.588765             |                                    |
| 1060.861742       | 31.362417                         | 8.339622              |                                    |
| 1073.601502       | 24.933400                         | 6.709694              |                                    |
| 1121.877687       | 90.324739                         | 25.399800             |                                    |
| 1137.875537       | 38.534780                         | 10.990709             |                                    |
| 1147.906521       | 2.179276                          | 0.627042              |                                    |
| 1157.854696       | 11.442186                         | 3.320788              |                                    |
| 1174.519919       | 64.576272                         | 19.011283             |                                    |
| 1267.709171       | 51.380774                         | 16.326698             |                                    |
| 1282.354092       | 1.776842                          | 0.571130              |                                    |

Supplementary Material (ESI) for Chemical Communications  
This journal is (c) The Royal Society of Chemistry 2011

|             |            |            |
|-------------|------------|------------|
| 1321.992089 | 0.813804   | 0.269666   |
| 1389.035260 | 1.623266   | 0.565173   |
| 1413.771309 | 0.464063   | 0.164450   |
| 1433.926301 | 1.289539   | 0.463489   |
| 1436.229796 | 23.711258  | 8.536043   |
| 1447.864248 | 42.896206  | 15.567712  |
| 1450.766270 | 21.150001  | 7.691055   |
| 1464.967412 | 4.868596   | 1.787762   |
| 1480.637399 | 83.651330  | 31.045570  |
| 1570.930655 | 5.464874   | 2.151866   |
| 1586.590635 | 58.181268  | 23.138017  |
| 2841.402482 | 68.126959  | 48.521009  |
| 2849.215047 | 180.726256 | 129.069775 |
| 2979.175412 | 58.599238  | 43.758872  |
| 2980.469965 | 47.402298  | 35.412959  |
| 3036.317424 | 14.840895  | 11.294976  |
| 3038.123532 | 30.044249  | 22.879412  |
| 3079.077069 | 6.418546   | 4.953764   |
| 3088.123807 | 0.289969   | 0.224452   |
| 3095.661456 | 16.813728  | 13.046546  |
| 3104.923596 | 23.574034  | 18.346909  |
| 3115.937347 | 14.878208  | 11.620302  |

| Temp   |                                             | Transl | Rotat  | Vibrat  | Total   |
|--------|---------------------------------------------|--------|--------|---------|---------|
| ----   |                                             | -----  | -----  | -----   | -----   |
| 298.15 | Entropy (cal/mole-K):                       | 40.288 | 28.787 | 16.772  | 85.848  |
|        | Internal Energy (Kcal/mole):                | 0.889  | 0.889  | 108.146 | 109.923 |
|        | Constant Volume Heat Capacity (cal/mole-K): | 2.981  | 2.981  | 25.693  | 31.654  |

\*\*\*\*\*

V

GEOMETRY UPDATE \*\*\* 19 \*\*\*

\*\*\* Using NEW gradient routines \*\*\*

Energy gradients wrt nuclear displacements

=====

| Atom  | Cartesian (a.u./angstrom) |           |           |
|-------|---------------------------|-----------|-----------|
|       | X                         | Y         | Z         |
| ----- |                           |           |           |
| 1 C   | 0.000045                  | 0.000005  | -0.000011 |
| 2 H   | -0.000026                 | 0.000024  | -0.000050 |
| 3 C   | 0.000019                  | 0.000053  | 0.000016  |
| 4 H   | 0.000055                  | 0.000029  | -0.000039 |
| 5 C   | 0.000035                  | 0.000028  | -0.000010 |
| 6 H   | 0.000079                  | 0.000038  | 0.000028  |
| 7 C   | 0.000064                  | 0.000037  | 0.000026  |
| 8 H   | 0.000052                  | 0.000006  | 0.000006  |
| 9 C   | 0.000040                  | -0.000011 | -0.000002 |
| 10 C  | 0.000145                  | -0.000041 | 0.000179  |
| 11 C  | -0.000048                 | 0.000025  | -0.000143 |
| 12 C  | -0.000061                 | -0.000078 | 0.000028  |
| 13 H  | -0.000015                 | 0.000007  | -0.000006 |
| 14 C  | -0.000001                 | 0.000016  | -0.000009 |
| 15 N  | 0.000039                  | -0.000024 | 0.000025  |
| 16 C  | -0.000054                 | 0.000018  | -0.000016 |
| 17 H  | 0.000011                  | -0.000042 | -0.000013 |
| 18 C  | -0.000110                 | -0.000041 | -0.000084 |
| 19 H  | 0.000024                  | -0.000035 | -0.000035 |
| 20 C  | -0.000304                 | 0.000410  | 0.000087  |
| 21 C  | -0.000151                 | 0.000161  | 0.000117  |
| 22 C  | 0.000069                  | -0.000718 | 0.000238  |
| 23 C  | -0.000014                 | -0.000003 | -0.000096 |
| 24 C  | 0.000026                  | 0.000192  | -0.000072 |
| 25 C  | -0.000231                 | 0.000179  | -0.000029 |
| 26 C  | -0.000126                 | -0.000028 | -0.000109 |
| 27 C  | -0.000045                 | 0.000096  | -0.000037 |
| 28 H  | 0.000039                  | 0.000024  | -0.000009 |
| 29 H  | 0.000010                  | 0.000008  | 0.000065  |
| 30 H  | 0.000010                  | 0.000058  | 0.000041  |
| 31 H  | -0.000081                 | 0.000082  | 0.000000  |
| 32 H  | -0.000071                 | -0.000006 | -0.000048 |
| 33 N  | -0.000105                 | 0.000186  | -0.000135 |
| 34 Ir | 0.000107                  | -0.000603 | 0.000355  |
| 35 O  | 0.000237                  | -0.000448 | -0.000098 |
| 36 O  | -0.000151                 | 0.000090  | -0.000069 |
| 37 O  | -0.000199                 | 0.000301  | 0.000013  |
| 38 Cr | 0.000637                  | 0.000222  | -0.000333 |
| 39 Cl | -0.000182                 | -0.000045 | -0.000140 |
| 40 C  | 0.000026                  | -0.000016 | 0.000053  |
| 41 H  | 0.000091                  | -0.000010 | 0.000047  |
| 42 H  | 0.000018                  | -0.000057 | 0.000073  |
| 43 H  | 0.000065                  | -0.000027 | 0.000056  |
| 44 C  | -0.000011                 | -0.000031 | 0.000031  |
| 45 H  | 0.000039                  | -0.000022 | 0.000020  |
| 46 H  | 0.000029                  | -0.000018 | 0.000063  |
| 47 H  | -0.000025                 | 0.000007  | 0.000023  |
| ----- |                           |           |           |

Geometry Convergence Tests

Energy old : -11.18096267  
new : -11.18096759

Convergence tests:

(Energies in hartree, Gradients in hartree/angstr or radian, Lengths in angstrom, Angles in degrees)

| Item             | Value       | Criterion  | Conv. | Ratio      |
|------------------|-------------|------------|-------|------------|
| -----            |             |            |       |            |
| change in energy | -0.00000493 | 0.00100000 | YES   | 0.06240439 |
| gradient max     | 0.00069375  | 0.00100000 | YES   | 0.65663607 |
| gradient rms     | 0.00014202  | 0.00066667 | YES   | 0.91490827 |
| cart. step max   | 0.00275662  | 0.01000000 | YES   | 1.00738279 |
| cart. step rms   | 0.00085481  | 0.00666667 | YES   | 1.01977222 |

prediction dE : -0.00000327

\*\*\*\*\*  
Geometry CONVERGED  
\*\*\*\*\*

Summary of Bonding Energy (energy terms are taken from the energy decomposition above)

|                                 |                     |           |          |           |
|---------------------------------|---------------------|-----------|----------|-----------|
| =====                           |                     |           |          |           |
| Electrostatic Energy:           | -10.250530134594040 | -278.9311 | -6432.31 | -26912.76 |
| Kinetic Energy:                 | 12.347216971911195  | 335.9849  | 7748.00  | 32417.61  |
| Coulomb (Steric+OrbInt) Energy: | -2.989579188181153  | -81.3506  | -1875.99 | -7849.14  |
| XC Energy:                      | -10.288078926245573 | -279.9529 | -6455.87 | -27011.35 |
| -----                           |                     |           |          |           |

Supplementary Material (ESI) for Chemical Communications  
This journal is (c) The Royal Society of Chemistry 2011

Total Bonding Energy: -11.180971277109572 -304.2497 -7016.17 -29355.64

List of All Frequencies:

Intensities  
=====

| Frequency<br>cm-1 | Dipole Strength<br>1e-40 esu2 cm2 | Absorption<br>km/mole | Intensity (degeneracy not counted) |
|-------------------|-----------------------------------|-----------------------|------------------------------------|
| -----             | -----                             | -----                 |                                    |
| 22.526084         | 303.763406                        | 1.715139              |                                    |
| 39.528106         | 174.181636                        | 1.725784              |                                    |
| 52.358456         | 145.668845                        | 1.911752              |                                    |
| 54.342642         | 135.153582                        | 1.840969              |                                    |
| 61.863210         | 253.620925                        | 3.932743              |                                    |
| 66.906939         | 220.473893                        | 3.697485              |                                    |
| 72.709035         | 69.660475                         | 1.269559              |                                    |
| 82.764916         | 44.197087                         | 0.916892              |                                    |
| 86.699470         | 26.324279                         | 0.572072              |                                    |
| 94.417596         | 0.272045                          | 0.006438              |                                    |
| 106.337348        | 85.373837                         | 2.275562              |                                    |
| 112.855868        | 29.483046                         | 0.834016              |                                    |
| 121.159940        | 81.674703                         | 2.480417              |                                    |
| 124.743722        | 21.287056                         | 0.665599              |                                    |
| 136.824807        | 135.208923                        | 4.637119              |                                    |
| 156.578599        | 73.448296                         | 2.882652              |                                    |
| 165.205991        | 46.419930                         | 1.922243              |                                    |
| 166.940887        | 0.585776                          | 0.024512              |                                    |
| 194.941824        | 55.569256                         | 2.715299              |                                    |
| 226.493565        | 50.359470                         | 2.859006              |                                    |
| 237.332548        | 14.094216                         | 0.838448              |                                    |
| 246.449589        | 42.208430                         | 2.607386              |                                    |
| 253.298016        | 54.851728                         | 3.482573              |                                    |
| 283.154094        | 29.891649                         | 2.121538              |                                    |
| 296.622938        | 14.478900                         | 1.076511              |                                    |
| 303.252901        | 223.471633                        | 16.986560             |                                    |
| 314.869556        | 114.805281                        | 9.060885              |                                    |
| 329.816307        | 39.084198                         | 3.231107              |                                    |
| 338.811971        | 20.366545                         | 1.729634              |                                    |
| 370.843598        | 33.047794                         | 3.071930              |                                    |
| 379.257729        | 56.004762                         | 5.323993              |                                    |
| 421.290635        | 3.927828                          | 0.414775              |                                    |
| 433.516459        | 40.840891                         | 4.437914              |                                    |
| 435.860110        | 56.887405                         | 6.215003              |                                    |
| 458.775861        | 5.929847                          | 0.681902              |                                    |
| 471.365207        | 13.362321                         | 1.578765              |                                    |
| 483.292772        | 101.919828                        | 12.346591             |                                    |
| 489.955099        | 8.549682                          | 1.049988              |                                    |
| 499.040700        | 40.124481                         | 5.019072              |                                    |
| 511.340865        | 123.164083                        | 15.786020             |                                    |
| 531.156144        | 3.667965                          | 0.488344              |                                    |
| 538.153771        | 233.783845                        | 31.535444             |                                    |
| 544.638108        | 101.066948                        | 13.797336             |                                    |
| 553.020628        | 34.125251                         | 4.730372              |                                    |
| 565.347504        | 43.010912                         | 6.094979              |                                    |
| 574.048213        | 39.585765                         | 5.695941              |                                    |
| 587.919293        | 2.779045                          | 0.409535              |                                    |
| 634.896000        | 226.900567                        | 36.109065             |                                    |
| 647.001983        | 86.919231                         | 14.096119             |                                    |
| 647.448978        | 383.577081                        | 62.249558             |                                    |
| 656.015058        | 78.974918                         | 12.986169             |                                    |
| 669.789327        | 50.811330                         | 8.530546              |                                    |
| 696.196018        | 437.544766                        | 76.354054             |                                    |
| 718.865910        | 160.815461                        | 28.977023             |                                    |
| 720.671134        | 98.320686                         | 17.760701             |                                    |
| 745.475266        | 181.875837                        | 33.984925             |                                    |
| 774.203560        | 75.954242                         | 14.739585             |                                    |
| 781.151379        | 203.983813                        | 39.940085             |                                    |
| 796.059899        | 69.536572                         | 13.875131             |                                    |
| 799.003052        | 36.623008                         | 7.334669              |                                    |
| 799.526567        | 5.108666                          | 1.023808              |                                    |
| 818.562143        | 17.477049                         | 3.585897              |                                    |
| 821.884530        | 38.950477                         | 8.024198              |                                    |
| 830.592490        | 8.524073                          | 1.774652              |                                    |
| 834.461550        | 158.594484                        | 33.172063             |                                    |
| 873.103442        | 4.083842                          | 0.893743              |                                    |
| 882.057806        | 10.985766                         | 2.428877              |                                    |
| 894.236151        | 24.069828                         | 5.395147              |                                    |
| 909.229004        | 0.758777                          | 0.172928              |                                    |
| 937.322177        | 0.276386                          | 0.064936              |                                    |
| 940.117682        | 92.616593                         | 21.824741             |                                    |
| 968.111326        | 32.932711                         | 7.991547              |                                    |
| 990.126818        | 19.656076                         | 4.878269              |                                    |
| 998.937470        | 71.564985                         | 17.919132             |                                    |
| 1013.060106       | 112.314837                        | 28.520059             |                                    |
| 1039.386732       | 44.480091                         | 11.588331             |                                    |
| 1041.347516       | 12.560037                         | 3.278421              |                                    |
| 1046.306618       | 6.260333                          | 1.641854              |                                    |
| 1050.835671       | 34.004021                         | 8.956599              |                                    |
| 1053.554026       | 58.542877                         | 15.459981             |                                    |
| 1093.312761       | 1.283536                          | 0.351747              |                                    |
| 1093.853822       | 41.771623                         | 11.452985             |                                    |
| 1106.806658       | 4.443809                          | 1.232836              |                                    |
| 1110.247068       | 116.195602                        | 32.336082             |                                    |
| 1127.278609       | 3.598291                          | 1.016730              |                                    |
| 1156.697901       | 32.552453                         | 9.438038              |                                    |
| 1165.078171       | 51.592414                         | 15.066729             |                                    |

Supplementary Material (ESI) for Chemical Communications  
This journal is (c) The Royal Society of Chemistry 2011

|             |             |             |
|-------------|-------------|-------------|
| 1222.094437 | 86.982564   | 26.644958   |
| 1225.097677 | 54.464568   | 16.724874   |
| 1233.378598 | 0.365030    | 0.112850    |
| 1272.701032 | 2.828845    | 0.902430    |
| 1293.352598 | 15.871253   | 5.145247    |
| 1313.741695 | 65.312977   | 21.507381   |
| 1331.770161 | 19.070264   | 6.365962    |
| 1336.235317 | 218.408020  | 73.152572   |
| 1338.236246 | 6.235579    | 2.091643    |
| 1359.292418 | 13.653350   | 4.651898    |
| 1378.258596 | 15.933227   | 5.504432    |
| 1387.335546 | 18.650013   | 6.485429    |
| 1400.625343 | 41.656615   | 14.624601   |
| 1404.211517 | 104.713955  | 36.856591   |
| 1419.883617 | 17.488925   | 6.224349    |
| 1430.076042 | 68.812707   | 24.666404   |
| 1442.187367 | 2.598289    | 0.939263    |
| 1448.093230 | 10.944263   | 3.972474    |
| 1454.947974 | 168.779368  | 61.552386   |
| 1459.311695 | 129.648880  | 47.423642   |
| 1467.663931 | 11.109377   | 4.086904    |
| 1486.418929 | 113.429365  | 42.261489   |
| 1501.543125 | 141.560796  | 53.279345   |
| 1535.576102 | 1172.138459 | 451.157655  |
| 1548.924916 | 34.362118   | 13.340999   |
| 1595.279167 | 149.302028  | 59.700844   |
| 1870.936583 | 1658.800796 | 777.913614  |
| 1874.858944 | 1642.850363 | 772.048667  |
| 1932.908678 | 2382.712683 | 1154.412665 |
| 2936.737413 | 53.632937   | 39.479784   |
| 2942.171525 | 62.387723   | 46.009254   |
| 3021.909875 | 20.894663   | 15.826867   |
| 3025.069263 | 15.603563   | 11.831428   |
| 3072.519815 | 1.373849    | 1.058063    |
| 3079.917185 | 23.647505   | 18.255866   |
| 3127.603810 | 3.386989    | 2.655239    |
| 3130.305103 | 2.520855    | 1.977938    |
| 3145.131329 | 0.503413    | 0.396864    |
| 3152.321144 | 1.651332    | 1.304797    |
| 3168.322369 | 0.119193    | 0.094659    |
| 3172.318928 | 3.772359    | 2.999632    |
| 3172.601560 | 0.833094    | 0.662503    |
| 3174.711849 | 0.884845    | 0.704125    |
| 3175.493834 | 2.438783    | 1.941166    |
| 3183.477070 | 0.872749    | 0.696417    |
| 3188.419800 | 1.441654    | 1.152165    |
| 3198.424258 | 3.420506    | 2.742234    |

| Temp   |                                             | Transl | Rotat  | Vibrat  | Total   |
|--------|---------------------------------------------|--------|--------|---------|---------|
| ----   |                                             | -----  | -----  | -----   | -----   |
| 298.15 | Entropy (cal/mole-K):                       | 45.185 | 36.144 | 105.431 | 186.760 |
|        | Internal Energy (Kcal/mole):                | 0.889  | 0.889  | 226.847 | 228.625 |
|        | Constant Volume Heat Capacity (cal/mole-K): | 2.981  | 2.981  | 101.271 | 107.233 |

\*\*\*\*\*

# TS1-V

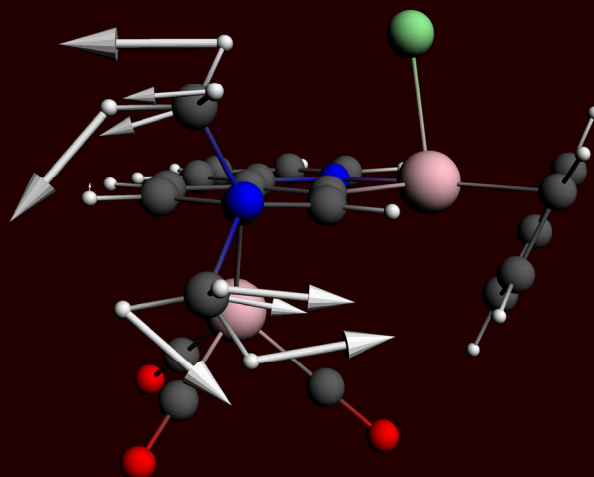

Geometry CYCLE 65

=====

Energy gradients wrt nuclear displacements

=====

| Atom  | Cartesian (a.u./angstrom) |           |           |
|-------|---------------------------|-----------|-----------|
|       | X                         | Y         | Z         |
| ----- |                           |           |           |
| 1 C   | 0.000093                  | 0.000006  | 0.000096  |
| 2 H   | -0.000014                 | -0.000005 | -0.000005 |
| 3 C   | -0.000004                 | 0.000011  | -0.000008 |
| 4 H   | 0.000006                  | 0.000007  | 0.000013  |
| 5 C   | -0.000029                 | -0.000005 | 0.000002  |
| 6 H   | 0.000000                  | -0.000009 | 0.000005  |
| 7 C   | -0.000009                 | -0.000006 | 0.000030  |
| 8 H   | 0.000013                  | 0.000007  | 0.000005  |
| 9 C   | -0.000015                 | 0.000002  | -0.000043 |
| 10 C  | -0.000195                 | -0.000069 | 0.000042  |
| 11 C  | 0.000049                  | -0.000083 | 0.000172  |
| 12 C  | 0.000038                  | 0.000166  | 0.000166  |
| 13 H  | -0.000001                 | 0.000018  | -0.000013 |
| 14 C  | 0.000202                  | 0.000010  | 0.000050  |
| 15 N  | -0.000151                 | 0.000017  | 0.000087  |
| 16 C  | 0.000059                  | -0.000005 | 0.000047  |
| 17 H  | -0.000007                 | 0.000011  | -0.000001 |
| 18 C  | 0.000049                  | 0.000036  | 0.000047  |
| 19 H  | -0.000033                 | 0.000012  | -0.000032 |
| 20 C  | -0.000045                 | 0.000119  | 0.000045  |
| 21 C  | -0.000078                 | -0.000041 | -0.000038 |
| 22 C  | 0.000117                  | -0.000356 | 0.000366  |
| 23 C  | -0.000110                 | 0.000032  | 0.000051  |
| 24 C  | 0.000028                  | 0.000020  | 0.000047  |
| 25 C  | -0.000018                 | -0.000013 | -0.000002 |
| 26 C  | 0.000187                  | 0.000038  | -0.000056 |
| 27 C  | 0.000046                  | -0.000048 | -0.000091 |
| 28 H  | 0.000000                  | -0.000012 | 0.000007  |
| 29 H  | 0.000004                  | 0.000004  | -0.000018 |
| 30 H  | -0.000003                 | -0.000013 | -0.000002 |
| 31 H  | 0.000026                  | 0.000026  | 0.000041  |
| 32 H  | 0.000016                  | 0.000020  | -0.000012 |
| 33 N  | -0.000201                 | 0.000091  | -0.000145 |
| 34 Ir | 0.000117                  | -0.000056 | 0.000123  |
| 35 O  | 0.000045                  | -0.000037 | -0.000077 |
| 36 O  | -0.000074                 | 0.000026  | -0.000166 |
| 37 O  | -0.000149                 | 0.000022  | -0.000007 |
| 38 Cr | -0.000031                 | -0.000100 | -0.000564 |
| 39 Cl | 0.000000                  | 0.000027  | -0.000077 |

Supplementary Material (ESI) for Chemical Communications  
This journal is (c) The Royal Society of Chemistry 2011

```

40 C    0.000005 -0.000009 -0.000037
41 H    -0.000004  0.000025 -0.000003
42 H    0.000016 -0.000006 -0.000006
43 H    -0.000024 -0.000021 -0.000014
44 C    0.000084  0.000212 -0.000081
45 H    0.000055 -0.000007 -0.000011
46 H    -0.000019 -0.000056  0.000040
47 H    -0.000041 -0.000011  0.000027
-----

```

-----  
Geometry Convergence after Step 65  
-----

```

current energy                -11.27434073 Hartree
abs of energy change          0.00000454      0.00100000    T
constrained gradient max      0.00056447      0.00100000    T
constrained gradient rms      0.00009250      0.00066667    T
gradient max                  0.00056447
gradient rms                  0.00009250
cart. step max                0.00620827      0.01000000    T
cart. step rms                0.00175878      0.00666667    T

```

Summary of Bonding Energy (energy terms are taken from the energy decomposition above)

```

=====
Electrostatic Energy:         -10.192832711128343      -277.3611      -6396.10      -26761.28
Kinetic Energy:              10.085509623764992      274.4407      6328.75      26479.50
Coulomb (Steric+OrbInt) Energy: -0.864038087507424      -23.5117      -542.19      -2268.53
XC Energy:                   -10.302979557120729      -280.3583      -6465.22      -27050.47
-----
Total Bonding Energy:        -11.274340731991504      -306.7904      -7074.76      -29600.78

```

List of All Frequencies:

Intensities

=====

| Frequency<br>cm <sup>-1</sup> | Dipole Strength<br>1e-40 esu <sup>2</sup> cm <sup>2</sup> | Absorption Intensity (degeneracy not counted)<br>km/mole |
|-------------------------------|-----------------------------------------------------------|----------------------------------------------------------|
| -----                         | -----                                                     | -----                                                    |
| -69.127986                    | 15.086930                                                 | -0.261416                                                |
| 26.642271                     | 67.476662                                                 | 0.450612                                                 |
| 35.805556                     | 225.241979                                                | 2.021519                                                 |
| 54.173049                     | 125.847114                                                | 1.708853                                                 |
| 60.485451                     | 215.159099                                                | 3.262036                                                 |
| 75.587212                     | 110.745318                                                | 2.098224                                                 |
| 80.466325                     | 40.754436                                                 | 0.821991                                                 |
| 84.018844                     | 3.679193                                                  | 0.077483                                                 |
| 94.970553                     | 5.319345                                                  | 0.126627                                                 |
| 105.846663                    | 6.333968                                                  | 0.168047                                                 |
| 109.213439                    | 10.101774                                                 | 0.276536                                                 |
| 115.387150                    | 104.835129                                                | 3.032092                                                 |
| 116.708743                    | 5.469756                                                  | 0.160011                                                 |
| 123.331412                    | 4.827077                                                  | 0.149223                                                 |
| 139.075219                    | 13.749406                                                 | 0.479305                                                 |
| 157.522483                    | 72.629154                                                 | 2.867686                                                 |
| 188.201590                    | 31.959520                                                 | 1.507654                                                 |
| 201.381009                    | 8.566296                                                  | 0.432404                                                 |
| 224.969374                    | 65.303303                                                 | 3.682448                                                 |
| 228.127539                    | 3.687570                                                  | 0.210861                                                 |
| 235.374780                    | 18.304025                                                 | 1.079903                                                 |
| 239.364701                    | 34.626555                                                 | 2.077531                                                 |
| 260.174510                    | 86.916027                                                 | 5.668168                                                 |
| 272.490694                    | 24.551263                                                 | 1.676886                                                 |
| 280.407513                    | 18.167054                                                 | 1.276886                                                 |
| 285.220699                    | 170.381374                                                | 12.180952                                                |
| 301.633206                    | 105.936194                                                | 8.009430                                                 |
| 312.352789                    | 13.289769                                                 | 1.040497                                                 |
| 333.242745                    | 90.127231                                                 | 7.528263                                                 |
| 352.601903                    | 67.794219                                                 | 5.991773                                                 |
| 384.858334                    | 33.707042                                                 | 3.251619                                                 |
| 403.576368                    | 11.819752                                                 | 1.195672                                                 |
| 407.478733                    | 5.367573                                                  | 0.548228                                                 |
| 425.542210                    | 32.366491                                                 | 3.452362                                                 |
| 436.536301                    | 44.213334                                                 | 4.837842                                                 |
| 446.845653                    | 1.368958                                                  | 0.153330                                                 |
| 474.793466                    | 53.836512                                                 | 6.407074                                                 |
| 481.802270                    | 2.975957                                                  | 0.359396                                                 |
| 497.834974                    | 9.450408                                                  | 1.179272                                                 |
| 500.970752                    | 32.516225                                                 | 4.083105                                                 |
| 508.821702                    | 140.733419                                                | 17.949028                                                |
| 533.470263                    | 100.479137                                                | 13.435820                                                |
| 546.439636                    | 218.912684                                                | 29.984112                                                |
| 556.273298                    | 11.779659                                                 | 1.642476                                                 |
| 566.163241                    | 46.421922                                                 | 6.587837                                                 |
| 567.456036                    | 51.784191                                                 | 7.365589                                                 |
| 589.546497                    | 46.123611                                                 | 6.815841                                                 |
| 630.456821                    | 518.915660                                                | 82.003086                                                |
| 641.169838                    | 202.867768                                                | 32.603499                                                |
| 649.862558                    | 13.578857                                                 | 2.211886                                                 |
| 668.199142                    | 55.393625                                                 | 9.277774                                                 |
| 679.418046                    | 156.032957                                                | 26.572443                                                |
| 691.406235                    | 255.294641                                                | 44.243865                                                |
| 712.570358                    | 28.186909                                                 | 5.034464                                                 |
| 716.553028                    | 149.528159                                                | 26.856499                                                |
| 738.600510                    | 339.638302                                                | 62.878813                                                |

Supplementary Material (ESI) for Chemical Communications  
This journal is (c) The Royal Society of Chemistry 2011

|             |             |             |
|-------------|-------------|-------------|
| 744.211183  | 217.621285  | 40.595289   |
| 756.030636  | 254.561551  | 48.240330   |
| 776.122360  | 31.723266   | 6.171435    |
| 799.303531  | 51.726068   | 10.363329   |
| 803.856405  | 26.328398   | 5.304946    |
| 810.743447  | 8.104650    | 1.647008    |
| 812.560582  | 51.501158   | 10.489404   |
| 835.761240  | 5.612030    | 1.175656    |
| 842.717493  | 0.683815    | 0.144444    |
| 847.014160  | 1.236667    | 0.262556    |
| 865.987531  | 12.754888   | 2.768639    |
| 884.128454  | 4.295072    | 0.951840    |
| 917.717633  | 0.240354    | 0.055289    |
| 933.290660  | 246.049207  | 57.559493   |
| 943.100287  | 0.333488    | 0.078834    |
| 962.860201  | 37.138581   | 8.963273    |
| 994.369318  | 34.115474   | 8.503098    |
| 1002.914758 | 41.033516   | 10.315275   |
| 1014.027069 | 55.551750   | 14.119696   |
| 1031.014879 | 30.569530   | 7.900085    |
| 1034.282674 | 26.203717   | 6.793291    |
| 1035.385681 | 16.146078   | 4.190321    |
| 1044.230670 | 5.525302    | 1.446207    |
| 1050.577959 | 15.745308   | 4.146269    |
| 1078.927874 | 10.853990   | 2.935350    |
| 1093.147053 | 34.736095   | 9.517824    |
| 1100.006457 | 23.405272   | 6.453376    |
| 1112.606254 | 6.260973    | 1.746069    |
| 1122.560512 | 178.255024  | 50.156776   |
| 1139.446115 | 13.527525   | 3.863583    |
| 1156.580082 | 12.437264   | 3.605609    |
| 1180.303405 | 41.011285   | 12.133193   |
| 1195.224449 | 32.906810   | 9.858556    |
| 1228.614623 | 0.063724    | 0.019624    |
| 1259.296643 | 27.512454   | 8.684313    |
| 1274.417821 | 39.119177   | 12.496247   |
| 1293.028728 | 23.583308   | 7.643477    |
| 1306.216115 | 31.023140   | 10.157313   |
| 1323.478479 | 34.367347   | 11.400948   |
| 1331.248372 | 2.661683    | 0.888165    |
| 1339.912524 | 10.023253   | 3.366380    |
| 1365.323047 | 8.906170    | 3.047926    |
| 1385.967300 | 18.704434   | 6.497939    |
| 1398.442913 | 10.208133   | 3.578237    |
| 1400.250341 | 90.254120   | 31.677492   |
| 1423.317696 | 10.233959   | 3.651099    |
| 1425.609258 | 8.672362    | 3.098960    |
| 1433.755089 | 79.157679   | 28.447630   |
| 1440.833792 | 36.913306   | 13.331373   |
| 1443.966210 | 17.230548   | 6.236403    |
| 1449.217180 | 24.449483   | 8.881396    |
| 1456.648310 | 162.010022  | 59.152712   |
| 1467.447821 | 96.683061   | 35.562406   |
| 1474.938600 | 19.702795   | 7.284166    |
| 1500.971340 | 428.104924  | 161.064821  |
| 1555.591785 | 20.368444   | 7.942031    |
| 1591.765081 | 136.803216  | 54.582491   |
| 1886.773509 | 1531.713491 | 724.394889  |
| 1895.052135 | 1403.484073 | 666.663566  |
| 1946.647834 | 2455.252787 | 1198.013394 |
| 2866.472915 | 102.914432  | 73.943873   |
| 2883.840156 | 84.273118   | 60.916974   |
| 2996.881200 | 35.661073   | 26.788105   |
| 3006.588548 | 37.997581   | 28.635714   |
| 3052.971881 | 12.823352   | 9.813015    |
| 3075.268644 | 12.346326   | 9.516974    |
| 3124.630719 | 2.863258    | 2.242525    |
| 3128.917464 | 1.084989    | 0.850937    |
| 3138.219871 | 2.671113    | 2.101133    |
| 3139.498409 | 2.077071    | 1.634518    |
| 3145.123339 | 0.383374    | 0.302230    |
| 3155.282477 | 1.717284    | 1.358183    |
| 3160.137886 | 0.463128    | 0.366847    |
| 3170.021417 | 1.770592    | 1.406886    |
| 3171.108699 | 0.842133    | 0.669375    |
| 3182.556403 | 2.443881    | 1.949550    |
| 3184.081492 | 0.212235    | 0.169387    |
| 3200.251131 | 2.271526    | 1.822132    |

| Temp   |                                             | Transl | Rotat  | Vibrat  | Total   |
|--------|---------------------------------------------|--------|--------|---------|---------|
| ----   |                                             | -----  | -----  | -----   | -----   |
| 298.15 | Entropy (cal/mole-K):                       | 45.185 | 36.168 | 99.981  | 181.333 |
|        | Internal Energy (Kcal/mole):                | 0.889  | 0.889  | 225.008 | 226.785 |
|        | Constant Volume Heat Capacity (cal/mole-K): | 2.981  | 2.981  | 100.097 | 106.059 |

\*\*\*\*\*

## TS2-V

Geometry CYCLE 41

=====

Energy gradients wrt nuclear displacements

=====

| Atom  | Cartesian (a.u./angstrom) |           |           |
|-------|---------------------------|-----------|-----------|
|       | X                         | Y         | Z         |
| ----- |                           |           |           |
| 1 C   | -0.000151                 | 0.000284  | 0.000147  |
| 2 H   | -0.000003                 | 0.000042  | -0.000035 |
| 3 C   | 0.000196                  | -0.000115 | -0.000142 |
| 4 H   | -0.000173                 | 0.000081  | 0.000109  |
| 5 C   | -0.000326                 | 0.000052  | 0.000196  |
| 6 H   | -0.000043                 | -0.000207 | 0.000063  |
| 7 C   | 0.000564                  | -0.000250 | 0.000276  |
| 8 H   | -0.000050                 | -0.000120 | 0.000150  |
| 9 C   | -0.000542                 | 0.000077  | -0.000854 |
| 10 C  | -0.000183                 | -0.000163 | -0.000375 |
| 11 C  | 0.000532                  | -0.000118 | -0.000818 |
| 12 C  | -0.000244                 | 0.000105  | -0.000237 |
| 13 H  | 0.000063                  | -0.000003 | 0.000157  |
| 14 C  | -0.000366                 | 0.000332  | -0.000080 |
| 15 N  | -0.000102                 | -0.000398 | -0.000037 |
| 16 C  | 0.000109                  | -0.000212 | 0.000004  |
| 17 H  | 0.000023                  | -0.000002 | 0.000050  |
| 18 C  | 0.000155                  | 0.000241  | -0.000087 |
| 19 H  | 0.000014                  | 0.000025  | -0.000006 |
| 20 C  | -0.000098                 | 0.000117  | 0.000338  |
| 21 C  | 0.000599                  | -0.000346 | 0.000370  |
| 22 C  | 0.000174                  | -0.000042 | 0.000990  |
| 23 C  | 0.000151                  | 0.000116  | 0.000048  |
| 24 C  | -0.000234                 | -0.000082 | -0.000209 |
| 25 C  | -0.000105                 | -0.000223 | 0.000253  |
| 26 C  | 0.000135                  | -0.000303 | 0.000423  |
| 27 C  | 0.000106                  | -0.000148 | -0.000195 |
| 28 H  | 0.000040                  | 0.000064  | 0.000011  |
| 29 H  | 0.000021                  | 0.000055  | 0.000009  |
| 30 H  | 0.000046                  | 0.000138  | -0.000099 |
| 31 H  | -0.000023                 | 0.000037  | -0.000116 |
| 32 H  | 0.000072                  | 0.000086  | -0.000108 |
| 33 N  | -0.000219                 | -0.000045 | -0.000489 |
| 34 Ir | 0.000017                  | 0.000851  | 0.000901  |
| 35 O  | 0.000115                  | -0.000855 | -0.000471 |
| 36 O  | 0.000016                  | 0.000365  | -0.000533 |
| 37 O  | -0.000352                 | 0.000099  | -0.000482 |
| 38 Cr | -0.000078                 | 0.000144  | 0.000591  |
| 39 Cl | -0.000038                 | -0.000017 | 0.000163  |
| 40 C  | 0.000046                  | 0.000108  | -0.000147 |
| 41 H  | 0.000050                  | -0.000008 | 0.000008  |
| 42 H  | -0.000077                 | -0.000119 | 0.000102  |
| 43 H  | 0.000018                  | 0.000040  | 0.000026  |
| 44 C  | 0.000258                  | 0.000174  | 0.000116  |
| 45 H  | -0.000042                 | 0.000108  | -0.000023 |
| 46 H  | -0.000007                 | 0.000026  | 0.000031  |
| 47 H  | -0.000067                 | 0.000007  | 0.000015  |
| ----- |                           |           |           |

-----  
Geometry Convergence after Step 41

-----

|                          |                      |            |   |
|--------------------------|----------------------|------------|---|
| current energy           | -11.16485526 Hartree |            |   |
| energy change            | -0.00000776          | 0.00100000 | T |
| constrained gradient max | 0.00099011           | 0.00100000 | T |
| constrained gradient rms | 0.00027313           | 0.00066667 | T |
| gradient max             | 0.00099011           |            |   |
| gradient rms             | 0.00027313           |            |   |
| cart. step max           | 0.00563994           | 0.01000000 | T |
| cart. step rms           | 0.00175992           | 0.00666667 | T |

Summary of Bonding Energy (energy terms are taken from the energy decomposition above)

=====

|                                 |                     |           |          |           |
|---------------------------------|---------------------|-----------|----------|-----------|
| Electrostatic Energy:           | -10.214278627581541 | -277.9447 | -6409.56 | -26817.58 |
| Kinetic Energy:                 | 12.292409724899045  | 334.4935  | 7713.60  | 32273.72  |
| Coulomb (Steric+OrbInt) Energy: | -2.981608285363222  | -81.1337  | -1870.99 | -7828.21  |
| XC Energy:                      | -10.261378066994137 | -279.2263 | -6439.11 | -26941.24 |
| -----                           |                     |           |          |           |
| Total Bonding Energy:           | -11.164855255039855 | -303.8112 | -7006.05 | -29313.32 |

List of All Frequencies:

Intensities

=====

| Frequency<br>cm-1 | Dipole Strength<br>1e-40 esu2 cm2 | Absorption Intensity (degeneracy not counted)<br>km/mole |
|-------------------|-----------------------------------|----------------------------------------------------------|
| -----             |                                   |                                                          |
| -62.737230        | 21.288613                         | -0.334773                                                |
| 21.269003         | 64.445652                         | 0.343573                                                 |
| 37.675295         | 248.141748                        | 2.343336                                                 |

|             |            |           |
|-------------|------------|-----------|
| 52.769643   | 127.739142 | 1.689609  |
| 64.528903   | 231.930998 | 3.751381  |
| 67.593743   | 14.876354  | 0.252047  |
| 81.571263   | 32.081638  | 0.655952  |
| 84.940319   | 7.629489   | 0.162438  |
| 92.661573   | 3.921289   | 0.091077  |
| 108.011739  | 9.080097   | 0.245833  |
| 115.196162  | 17.272143  | 0.498726  |
| 116.116898  | 41.982779  | 1.221925  |
| 121.523200  | 84.035053  | 2.559751  |
| 127.797913  | 7.447778   | 0.238577  |
| 146.381310  | 24.706888  | 0.906529  |
| 159.775000  | 64.658844  | 2.589494  |
| 195.640513  | 12.134992  | 0.595081  |
| 206.119828  | 18.900759  | 0.976511  |
| 228.232129  | 73.131823  | 4.183707  |
| 229.678573  | 21.229560  | 1.222192  |
| 236.592635  | 15.489151  | 0.918559  |
| 247.486846  | 20.109251  | 1.247458  |
| 257.890265  | 80.635910  | 5.212445  |
| 282.149142  | 6.231179   | 0.440684  |
| 284.682220  | 21.000844  | 1.498564  |
| 303.198155  | 221.801457 | 16.856563 |
| 320.437776  | 32.437063  | 2.605333  |
| 330.964092  | 69.885379  | 5.797560  |
| 335.886238  | 25.625677  | 2.157474  |
| 374.805447  | 66.372816  | 6.235542  |
| 381.976673  | 31.136187  | 2.981126  |
| 403.120123  | 10.074766  | 1.017999  |
| 412.918610  | 8.239304   | 0.852772  |
| 433.601954  | 25.390080  | 2.759519  |
| 443.668327  | 32.937535  | 3.662921  |
| 457.808860  | 2.789071   | 0.320053  |
| 482.180627  | 51.992595  | 6.283901  |
| 486.518651  | 5.006964   | 0.610593  |
| 504.409324  | 13.051694  | 1.650168  |
| 512.869791  | 84.073772  | 10.808010 |
| 519.294195  | 49.097293  | 6.390710  |
| 538.581378  | 94.445250  | 12.749981 |
| 551.234040  | 100.565655 | 13.895167 |
| 552.536761  | 102.328736 | 14.172186 |
| 566.761047  | 57.444554  | 8.160691  |
| 567.413188  | 48.491397  | 6.896714  |
| 600.094324  | 46.861680  | 7.048804  |
| 634.491854  | 463.447266 | 73.706272 |
| 645.554495  | 173.365434 | 28.052624 |
| 650.988535  | 19.381991  | 3.162640  |
| 670.245473  | 67.412039  | 11.325292 |
| 681.324507  | 114.100351 | 19.485837 |
| 695.218125  | 309.223764 | 53.885513 |
| 713.987729  | 24.574276  | 4.397943  |
| 720.490830  | 220.187103 | 39.764764 |
| 749.267890  | 147.810134 | 27.759996 |
| 789.349079  | 271.975865 | 53.811803 |
| 799.092982  | 68.777916  | 13.776040 |
| 803.350876  | 24.026221  | 4.838033  |
| 805.195371  | 3.926097   | 0.792392  |
| 815.845382  | 21.599085  | 4.416938  |
| 820.349646  | 10.597639  | 2.179145  |
| 831.664995  | 136.666494 | 28.489744 |
| 834.247067  | 51.778896  | 10.827434 |
| 869.958558  | 10.135920  | 2.210242  |
| 881.075814  | 3.318503   | 0.732881  |
| 883.874166  | 5.000979   | 1.107959  |
| 904.753435  | 27.300444  | 6.191245  |
| 910.701441  | 0.594886   | 0.135796  |
| 933.761915  | 262.919067 | 61.536998 |
| 939.101483  | 0.415975   | 0.097917  |
| 965.929872  | 34.597818  | 8.376689  |
| 992.869842  | 29.803827  | 7.417242  |
| 1003.676069 | 38.400536  | 9.660707  |
| 1011.716052 | 65.025945  | 16.490103 |
| 1030.853187 | 29.345043  | 7.582451  |
| 1034.060286 | 45.623023  | 11.825186 |
| 1041.067042 | 10.997202  | 2.869716  |
| 1045.009482 | 7.066255   | 1.850920  |
| 1051.439391 | 19.457327  | 5.127970  |
| 1078.643583 | 12.536704  | 3.389529  |
| 1095.598141 | 34.744490  | 9.541470  |
| 1101.478875 | 11.637956  | 3.213150  |
| 1115.849615 | 3.242410   | 0.906884  |
| 1122.551516 | 187.087432 | 52.641586 |
| 1139.396762 | 12.429832  | 3.549918  |
| 1157.820368 | 11.005571  | 3.193977  |
| 1179.292828 | 39.883139  | 11.789328 |
| 1197.178448 | 52.633404  | 15.794228 |
| 1232.921629 | 0.061829   | 0.019108  |
| 1263.845680 | 26.931693  | 8.531704  |
| 1274.502971 | 40.283083  | 12.868906 |
| 1289.355674 | 17.962404  | 5.805174  |
| 1303.590218 | 29.903856  | 9.771165  |
| 1329.810866 | 32.776497  | 10.925227 |
| 1333.971058 | 2.407764   | 0.805079  |
| 1341.568487 | 4.113193   | 1.383152  |
| 1356.450048 | 7.235267   | 2.460008  |
| 1386.870779 | 17.599593  | 6.118102  |
| 1398.268781 | 10.288722  | 3.606037  |
| 1399.821986 | 101.609789 | 35.652208 |
| 1424.194302 | 10.804602  | 3.857057  |

Supplementary Material (ESI) for Chemical Communications  
This journal is (c) The Royal Society of Chemistry 2011

|             |             |             |
|-------------|-------------|-------------|
| 1426.423252 | 8.238860    | 2.945734    |
| 1435.321958 | 76.354391   | 27.470174   |
| 1440.610215 | 37.563568   | 13.564113   |
| 1445.020459 | 29.286076   | 10.607505   |
| 1450.007592 | 24.507094   | 8.907179    |
| 1456.174351 | 161.668350  | 59.008755   |
| 1468.627257 | 106.480746  | 39.197714   |
| 1475.749019 | 25.448260   | 9.413447    |
| 1503.596414 | 435.196416  | 164.019189  |
| 1550.522033 | 21.008594   | 8.164940    |
| 1594.968518 | 105.994278  | 42.375282   |
| 1881.137155 | 1532.864385 | 722.773574  |
| 1892.237974 | 1442.022931 | 683.952578  |
| 1944.354446 | 2441.959422 | 1190.123280 |
| 2867.307713 | 104.787125  | 75.311326   |
| 2885.096266 | 81.020078   | 58.591017   |
| 2996.795620 | 36.913821   | 27.728361   |
| 3005.061680 | 37.818779   | 28.486492   |
| 3052.645805 | 12.696468   | 9.714880    |
| 3074.241405 | 13.443974   | 10.359617   |
| 3125.336404 | 2.375118    | 1.860630    |
| 3130.714881 | 1.122503    | 0.880865    |
| 3138.862562 | 3.084055    | 2.426456    |
| 3140.666792 | 1.509727    | 1.188498    |
| 3145.217407 | 0.384140    | 0.302844    |
| 3156.360719 | 1.374695    | 1.087605    |
| 3167.417787 | 0.466484    | 0.370357    |
| 3173.674395 | 1.540882    | 1.225773    |
| 3178.773058 | 0.833771    | 0.664331    |
| 3187.079414 | 1.421342    | 1.135454    |
| 3191.128828 | 2.477626    | 1.981793    |
| 3202.423240 | 2.503636    | 2.009685    |

| Temp   |                                             | Transl | Rotat  | Vibrat  | Total   |
|--------|---------------------------------------------|--------|--------|---------|---------|
| ----   |                                             | -----  | -----  | -----   | -----   |
| 298.15 | Entropy (cal/mole-K):                       | 45.185 | 36.162 | 98.884  | 180.232 |
|        | Internal Energy (Kcal/mole):                | 0.889  | 0.889  | 225.601 | 227.379 |
|        | Constant Volume Heat Capacity (cal/mole-K): | 2.981  | 2.981  | 99.181  | 105.143 |

\*\*\*\*\*

## II

Geometry CYCLE 9  
=====

Energy gradients wrt nuclear displacements  
=====

| Atom  | Cartesian (a.u./angstrom) |           |           |
|-------|---------------------------|-----------|-----------|
|       | X                         | Y         | Z         |
| ----- |                           |           |           |
| 1 C   | -0.000009                 | 0.000111  | 0.000016  |
| 2 H   | 0.000020                  | -0.000044 | -0.000040 |
| 3 C   | 0.000011                  | -0.000084 | 0.000052  |
| 4 H   | 0.000071                  | 0.000022  | 0.000000  |
| 5 C   | -0.000050                 | -0.000024 | -0.000081 |
| 6 H   | 0.000058                  | 0.000072  | 0.000021  |
| 7 C   | -0.000064                 | -0.000043 | 0.000025  |
| 8 H   | 0.000027                  | 0.000058  | 0.000028  |
| 9 C   | -0.000052                 | 0.000100  | 0.000011  |
| 10 C  | 0.000035                  | 0.000120  | 0.000086  |
| 11 C  | 0.000324                  | -0.000339 | -0.000290 |
| 12 C  | -0.000159                 | 0.000135  | -0.000044 |
| 13 H  | -0.000015                 | -0.000102 | -0.000078 |
| 14 C  | -0.000030                 | -0.000039 | 0.000098  |
| 15 N  | 0.000167                  | -0.000159 | 0.000530  |
| 16 C  | 0.000017                  | -0.000129 | -0.000014 |
| 17 H  | -0.000015                 | 0.000140  | 0.000012  |
| 18 C  | 0.000011                  | -0.000017 | -0.000068 |
| 19 H  | -0.000022                 | 0.000080  | 0.000039  |
| 20 Cl | 0.000050                  | 0.000035  | -0.000247 |
| 21 C  | -0.000063                 | -0.000053 | -0.000177 |
| 22 C  | -0.000163                 | -0.000281 | -0.000053 |
| 23 C  | -0.000247                 | 0.000178  | -0.000052 |
| 24 C  | 0.000249                  | 0.000134  | -0.000253 |
| 25 C  | 0.000197                  | -0.000149 | 0.000121  |
| 26 H  | -0.000028                 | -0.000009 | -0.000026 |
| 27 H  | -0.000047                 | 0.000020  | -0.000008 |
| 28 H  | -0.000006                 | -0.000051 | 0.000047  |
| 29 H  | 0.000020                  | -0.000004 | 0.000059  |
| 30 H  | 0.000053                  | 0.000034  | -0.000026 |
| 31 N  | -0.000196                 | -0.000216 | -0.000088 |
| 32 Ir | -0.000080                 | 0.000312  | 0.000925  |
| 33 C  | -0.000010                 | 0.000309  | -0.000094 |
| 34 H  | -0.000074                 | 0.000010  | -0.000102 |
| 35 H  | 0.000074                  | 0.000026  | -0.000049 |
| 36 H  | -0.000088                 | -0.000065 | 0.000053  |
| 37 C  | 0.000085                  | -0.000149 | -0.000277 |
| 38 H  | -0.000003                 | 0.000027  | -0.000070 |
| 39 H  | 0.000037                  | 0.000024  | -0.000032 |
| 40 H  | -0.000084                 | 0.000012  | 0.000043  |
| ----- |                           |           |           |

-----  
Geometry Convergence after Step 9  
-----

|                          |             |            |   |                     |
|--------------------------|-------------|------------|---|---------------------|
| current energy           |             |            |   | -9.12330744 Hartree |
| energy change            | -0.00000207 | 0.00100000 | T |                     |
| constrained gradient max | 0.00092536  | 0.00100000 | T |                     |
| constrained gradient rms | 0.00015069  | 0.00066667 | T |                     |
| gradient max             | 0.00092536  |            |   |                     |
| gradient rms             | 0.00015069  |            |   |                     |
| cart. step max           | 0.00951725  | 0.01000000 | T |                     |
| cart. step rms           | 0.00221713  | 0.00666667 | T |                     |

Summary of Bonding Energy (energy terms are taken from the energy decomposition above)  
=====

|                                 |                    |           |          |           |
|---------------------------------|--------------------|-----------|----------|-----------|
| Electrostatic Energy:           | -8.117518802494171 | -220.8889 | -5093.82 | -21312.54 |
| Kinetic Energy:                 | 10.300182031559117 | 280.2822  | 6463.46  | 27043.12  |
| Coulomb (Steric+OrbInt) Energy: | -2.676159899475039 | -72.8220  | -1679.32 | -7026.26  |
| XC Energy:                      | -8.629809850124204 | -234.8291 | -5415.29 | -22657.56 |
| -----                           |                    |           |          |           |
| Total Bonding Energy:           | -9.123306520534296 | -248.2578 | -5724.96 | -23953.24 |

List of All Frequencies:

Intensities  
=====

| Frequency<br>cm-1 | Dipole Strength<br>1e-40 esu2 cm2 | Absorption Intensity (degeneracy not counted)<br>km/mole |
|-------------------|-----------------------------------|----------------------------------------------------------|
| -----             |                                   |                                                          |
| 30.679474         | 38.698702                         | 0.297593                                                 |
| 46.733893         | 105.326892                        | 1.233813                                                 |
| 54.995554         | 215.603390                        | 2.972085                                                 |
| 61.871945         | 53.447284                         | 0.828891                                                 |
| 92.763343         | 2.435172                          | 0.056622                                                 |
| 105.815217        | 11.981492                         | 0.317788                                                 |
| 116.279662        | 17.672813                         | 0.515095                                                 |
| 132.238733        | 44.765637                         | 1.483821                                                 |

Supplementary Material (ESI) for Chemical Communications  
This journal is (c) The Royal Society of Chemistry 2011

|             |             |            |
|-------------|-------------|------------|
| 142.628480  | 10.229847   | 0.365724   |
| 178.505675  | 5.225450    | 0.233805   |
| 189.534483  | 3.358233    | 0.159543   |
| 214.179669  | 34.341269   | 1.843625   |
| 229.593639  | 12.985461   | 0.747301   |
| 248.071862  | 60.523254   | 3.763378   |
| 250.270129  | 6.713160    | 0.421128   |
| 289.051102  | 31.967761   | 2.316141   |
| 306.101223  | 224.090913  | 17.193622  |
| 317.321679  | 20.179971   | 1.605086   |
| 323.547081  | 25.480517   | 2.066445   |
| 335.343907  | 2.863283    | 0.240676   |
| 373.094682  | 58.375847   | 5.459217   |
| 424.778521  | 15.013639   | 1.598551   |
| 433.338916  | 44.239866   | 4.805290   |
| 449.623914  | 10.538583   | 1.187708   |
| 469.064398  | 4.903631    | 0.576538   |
| 514.493891  | 40.139116   | 5.176379   |
| 535.482765  | 28.059306   | 3.766175   |
| 549.798828  | 34.063897   | 4.694358   |
| 567.732091  | 51.951184   | 7.392936   |
| 572.811614  | 31.780706   | 4.563031   |
| 591.913038  | 31.990509   | 4.746321   |
| 653.164769  | 5.765202    | 0.943877   |
| 674.365837  | 24.887223   | 4.206783   |
| 698.858702  | 82.289570   | 14.414920  |
| 715.492029  | 149.576754  | 26.825447  |
| 722.260477  | 4.070925    | 0.736996   |
| 737.336692  | 362.178214  | 66.936999  |
| 762.760640  | 89.938018   | 17.195296  |
| 767.066805  | 139.976832  | 26.913329  |
| 788.000018  | 101.267929  | 20.002129  |
| 799.242705  | 81.879174   | 16.403261  |
| 804.583635  | 25.057941   | 5.053528   |
| 806.687226  | 1.285736    | 0.259977   |
| 818.332919  | 9.284290    | 1.904394   |
| 824.049636  | 6.870648    | 1.419153   |
| 825.529633  | 154.772579  | 32.026152  |
| 872.483070  | 6.429177    | 1.406017   |
| 876.526851  | 22.513156   | 4.946291   |
| 888.643280  | 3.948684    | 0.879545   |
| 905.139769  | 0.932363    | 0.211533   |
| 931.924551  | 0.131885    | 0.030807   |
| 951.137217  | 127.001696  | 30.278250  |
| 966.068522  | 40.958019   | 9.918019   |
| 988.644646  | 20.518207   | 5.084611   |
| 997.711617  | 51.189072   | 12.801485  |
| 1014.540986 | 201.514471  | 51.245284  |
| 1039.994318 | 4.511039    | 1.175941   |
| 1040.502941 | 33.649705   | 8.776122   |
| 1044.749741 | 6.086175    | 1.593803   |
| 1052.398018 | 40.105056   | 10.579307  |
| 1056.532267 | 104.144938  | 27.580301  |
| 1092.806563 | 56.246676   | 15.407005  |
| 1101.568520 | 43.616748   | 12.043227  |
| 1105.195667 | 1.519021    | 0.420805   |
| 1106.737918 | 3.461857    | 0.960355   |
| 1150.129745 | 0.232968    | 0.067162   |
| 1153.495259 | 121.350298  | 35.086070  |
| 1165.156566 | 67.635376   | 19.753146  |
| 1232.722840 | 236.725756  | 73.145738  |
| 1233.259950 | 0.034102    | 0.010542   |
| 1242.635636 | 24.694478   | 7.691689   |
| 1275.062076 | 14.186578   | 4.534058   |
| 1295.324245 | 62.491991   | 20.289947  |
| 1328.408790 | 126.631306  | 42.164883  |
| 1330.523759 | 42.736712   | 14.252853  |
| 1334.926976 | 202.187344  | 67.653388  |
| 1337.308693 | 15.924738   | 5.338043   |
| 1352.117347 | 551.834743  | 187.025789 |
| 1386.165006 | 18.501595   | 6.428389   |
| 1397.069704 | 10.111076   | 3.540736   |
| 1411.663131 | 29.148475   | 10.313949  |
| 1417.846679 | 205.753124  | 73.122963  |
| 1423.777648 | 29.349245   | 10.474111  |
| 1435.173538 | 103.735263  | 37.317187  |
| 1438.017413 | 19.057886   | 6.869371   |
| 1447.658050 | 58.571899   | 21.253642  |
| 1460.373379 | 503.609102  | 184.346777 |
| 1463.878424 | 34.463720   | 12.645769  |
| 1472.526480 | 158.294788  | 58.426221  |
| 1494.603706 | 315.615949  | 118.239631 |
| 1534.861294 | 127.773624  | 49.157345  |
| 1540.767894 | 247.853748  | 95.721783  |
| 1585.916201 | 1648.506841 | 655.313417 |
| 1594.943144 | 73.506408   | 29.386541  |
| 2916.716045 | 96.424350   | 70.495101  |
| 2925.200718 | 181.772250  | 133.278877 |
| 2982.175855 | 35.049469   | 26.199486  |
| 2988.425476 | 27.311946   | 20.458470  |
| 3068.675716 | 1.951175    | 1.500809   |
| 3078.213984 | 32.092759   | 24.761898  |
| 3110.253274 | 12.521918   | 9.762132   |
| 3122.722436 | 2.636619    | 2.063758   |
| 3142.139094 | 2.188810    | 1.723898   |
| 3147.756889 | 2.560874    | 2.020540   |
| 3152.076444 | 8.967066    | 7.084761   |
| 3159.220160 | 9.711628    | 7.690419   |
| 3165.428030 | 0.858815    | 0.681413   |

Supplementary Material (ESI) for Chemical Communications  
This journal is (c) The Royal Society of Chemistry 2011

|             |          |          |
|-------------|----------|----------|
| 3167.405972 | 0.313921 | 0.249231 |
| 3168.035837 | 2.124218 | 1.686814 |
| 3179.316852 | 0.290840 | 0.231775 |
| 3185.141006 | 0.085358 | 0.068148 |
| 3195.396009 | 4.714462 | 3.776025 |

| Temp   |                                             | Transl | Rotat  | Vibrat  | Total   |
|--------|---------------------------------------------|--------|--------|---------|---------|
| ----   |                                             | -----  | -----  | -----   | -----   |
| 298.15 | Entropy (cal/mole-K):                       | 44.456 | 34.845 | 67.969  | 147.270 |
|        | Internal Energy (Kcal/mole):                | 0.889  | 0.889  | 204.183 | 205.960 |
|        | Constant Volume Heat Capacity (cal/mole-K): | 2.981  | 2.981  | 72.175  | 78.136  |

\*\*\*\*\*

## TS2-II

Geometry CYCLE 40

Energy gradients wrt nuclear displacements

| Atom  | Cartesian (a.u./angstrom) |           |           |
|-------|---------------------------|-----------|-----------|
|       | X                         | Y         | Z         |
| 1 C   | -0.000009                 | -0.000002 | -0.000009 |
| 2 H   | -0.000004                 | 0.000002  | -0.000001 |
| 3 C   | -0.000005                 | -0.000002 | -0.000014 |
| 4 H   | 0.000001                  | -0.000001 | -0.000005 |
| 5 C   | 0.000002                  | -0.000001 | 0.000005  |
| 6 H   | 0.000000                  | 0.000004  | 0.000004  |
| 7 C   | 0.000004                  | -0.000002 | -0.000004 |
| 8 H   | -0.000003                 | -0.000002 | 0.000000  |
| 9 C   | 0.000059                  | 0.000009  | -0.000020 |
| 10 C  | 0.000033                  | -0.000052 | -0.000022 |
| 11 C  | -0.000067                 | 0.000128  | 0.000030  |
| 12 C  | -0.000034                 | -0.000031 | -0.000034 |
| 13 H  | 0.000007                  | 0.000006  | 0.000008  |
| 14 C  | 0.000030                  | 0.000018  | 0.000052  |
| 15 N  | -0.000019                 | -0.000011 | -0.000036 |
| 16 C  | 0.000003                  | 0.000002  | -0.000006 |
| 17 H  | -0.000008                 | 0.000003  | -0.000004 |
| 18 C  | 0.000007                  | 0.000000  | -0.000008 |
| 19 H  | 0.000000                  | -0.000002 | 0.000004  |
| 20 H  | -0.000003                 | 0.000009  | -0.000003 |
| 21 H  | -0.000004                 | 0.000003  | -0.000002 |
| 22 C  | 0.000003                  | 0.000010  | 0.000005  |
| 23 C  | -0.000089                 | -0.000250 | 0.000244  |
| 24 C  | -0.000056                 | 0.000039  | -0.000027 |
| 25 C  | -0.000091                 | 0.000083  | -0.000034 |
| 26 C  | 0.000115                  | 0.000003  | -0.000012 |
| 27 C  | -0.000216                 | -0.000240 | 0.000342  |
| 28 H  | -0.000007                 | 0.000002  | -0.000009 |
| 29 H  | 0.000020                  | 0.000020  | 0.000016  |
| 30 H  | -0.000001                 | 0.000021  | 0.000025  |
| 31 H  | -0.000022                 | 0.000000  | 0.000024  |
| 32 H  | -0.000004                 | -0.000012 | -0.000011 |
| 33 N  | 0.000017                  | -0.000011 | 0.000105  |
| 34 Ir | 0.000316                  | 0.000276  | -0.000697 |
| 35 H  | -0.000002                 | -0.000004 | 0.000008  |
| 36 H  | -0.000001                 | 0.000004  | -0.000004 |
| 37 H  | -0.000002                 | 0.000002  | -0.000003 |
| 38 H  | 0.000005                  | -0.000007 | -0.000002 |
| 39 Cl | 0.000013                  | 0.000001  | 0.000080  |
| 40 C  | 0.000011                  | -0.000017 | 0.000017  |

Geometry Convergence after Step 40

|                          |                     |            |   |
|--------------------------|---------------------|------------|---|
| current energy           | -9.11308579 Hartree |            |   |
| energy change            | -0.00000113         | 0.00100000 | T |
| constrained gradient max | 0.00069708          | 0.00100000 | T |
| constrained gradient rms | 0.00009621          | 0.00066667 | T |
| gradient max             | 0.00069708          |            |   |
| gradient rms             | 0.00009621          |            |   |
| cart. step max           | 0.00229228          | 0.01000000 | T |
| cart. step rms           | 0.00074277          | 0.00666667 | T |

Summary of Bonding Energy (energy terms are taken from the energy decomposition above)

|                                 |                    |           |          |           |
|---------------------------------|--------------------|-----------|----------|-----------|
| Electrostatic Energy:           | -8.068113034761669 | -219.5445 | -5062.82 | -21182.83 |
| Kinetic Energy:                 | 10.268185605258807 | 279.4115  | 6443.38  | 26959.12  |
| Coulomb (Steric+OrbInt) Energy: | -2.714187387019308 | -73.8568  | -1703.18 | -7126.10  |
| XC Energy:                      | -8.598971123668818 | -233.9899 | -5395.94 | -22576.60 |
| Total Bonding Energy:           | -9.113085940190988 | -247.9797 | -5718.55 | -23926.40 |

List of All Frequencies:

Intensities

| Frequency<br>cm-1 | Dipole Strength<br>1e-40 esu2 cm2 | Absorption Intensity (degeneracy not counted)<br>km/mole |
|-------------------|-----------------------------------|----------------------------------------------------------|
| 70.383936         | 26.145372                         | -0.461261                                                |
| 36.799091         | 56.230527                         | 0.518665                                                 |
| 49.480215         | 231.685371                        | 2.873481                                                 |
| 54.620204         | 142.816135                        | 1.955279                                                 |
| 88.484277         | 3.122836                          | 0.069262                                                 |
| 106.736005        | 19.389686                         | 0.518752                                                 |
| 117.493021        | 22.775080                         | 0.670734                                                 |
| 124.665830        | 20.203235                         | 0.631315                                                 |
| 133.832418        | 27.049260                         | 0.907392                                                 |
| 174.469193        | 7.861537                          | 0.343799                                                 |
| 204.853312        | 14.079753                         | 0.722963                                                 |

Supplementary Material (ESI) for Chemical Communications  
This journal is (c) The Royal Society of Chemistry 2011

|             |            |            |
|-------------|------------|------------|
| 226.419949  | 4.830232   | 0.274133   |
| 233.909249  | 61.725172  | 3.618993   |
| 236.827898  | 4.850692   | 0.287948   |
| 261.220481  | 7.668013   | 0.502074   |
| 264.608364  | 9.852469   | 0.653472   |
| 279.782167  | 32.413560  | 2.273133   |
| 304.629559  | 191.598164 | 14.629903  |
| 311.450453  | 80.660626  | 6.296927   |
| 333.833802  | 1.068688   | 0.089425   |
| 366.814269  | 38.428546  | 3.533282   |
| 371.056210  | 48.322548  | 4.494357   |
| 399.012405  | 3.510747   | 0.351127   |
| 427.244254  | 7.807801   | 0.836148   |
| 435.917910  | 24.268986  | 2.651761   |
| 443.407899  | 35.451969  | 3.940233   |
| 516.434382  | 21.824870  | 2.825172   |
| 521.963485  | 22.055857  | 2.885640   |
| 550.380203  | 32.896239  | 4.538237   |
| 565.098836  | 31.120123  | 4.408022   |
| 568.514531  | 45.658938  | 6.506470   |
| 623.487365  | 49.216967  | 7.691669   |
| 652.509954  | 12.263358  | 2.005740   |
| 672.333010  | 13.285189  | 2.238877   |
| 712.511853  | 129.436593 | 23.116775  |
| 720.768434  | 147.766064 | 26.696144  |
| 722.007696  | 158.662924 | 28.714109  |
| 757.130825  | 160.448017 | 30.449723  |
| 763.747142  | 166.880191 | 31.947175  |
| 791.978438  | 110.719388 | 21.979363  |
| 799.375296  | 42.205469  | 8.456634   |
| 810.701063  | 40.838384  | 8.298648   |
| 813.124312  | 47.668641  | 9.715559   |
| 819.543762  | 21.757346  | 4.469471   |
| 826.551080  | 147.590044 | 30.577701  |
| 834.021968  | 11.372711  | 2.377495   |
| 857.997603  | 31.424269  | 6.758173   |
| 875.830930  | 4.664112   | 1.023923   |
| 878.850055  | 25.601896  | 5.639817   |
| 908.303504  | 0.560118   | 0.127523   |
| 910.530219  | 0.445807   | 0.101746   |
| 936.014746  | 162.612422 | 38.151751  |
| 936.869956  | 0.813340   | 0.190998   |
| 966.558586  | 41.436779  | 10.039041  |
| 989.805528  | 28.666718  | 7.112232   |
| 1005.435264 | 69.394102  | 17.488588  |
| 1020.370460 | 27.592340  | 7.057071   |
| 1030.297388 | 40.300500  | 10.407612  |
| 1039.446497 | 11.440314  | 2.980699   |
| 1042.613193 | 24.044365  | 6.283688   |
| 1046.061289 | 14.187853  | 3.720077   |
| 1052.595450 | 54.326276  | 14.333409  |
| 1076.569120 | 19.105538  | 5.155601   |
| 1092.756584 | 51.897127  | 14.214933  |
| 1104.792762 | 5.469941   | 1.514752   |
| 1117.314160 | 16.336760  | 4.575297   |
| 1133.591929 | 148.638471 | 42.234372  |
| 1141.091644 | 23.004313  | 6.579727   |
| 1155.169557 | 11.239661  | 3.254446   |
| 1175.677721 | 42.491087  | 12.521726  |
| 1224.057741 | 41.675521  | 12.786775  |
| 1233.836970 | 0.054684   | 0.016912   |
| 1259.926790 | 14.482447  | 4.573675   |
| 1276.312084 | 87.116374  | 27.869857  |
| 1289.941417 | 21.620294  | 6.990523   |
| 1308.533971 | 85.106673  | 27.914296  |
| 1319.653370 | 33.609572  | 11.117341  |
| 1330.748046 | 8.433358   | 2.813030   |
| 1337.129992 | 1.585934   | 0.531541   |
| 1372.238188 | 35.853147  | 12.332038  |
| 1385.998133 | 17.582720  | 6.108390   |
| 1394.434374 | 1.048392   | 0.366437   |
| 1415.020972 | 93.869145  | 33.293834  |
| 1421.443820 | 2.201868   | 0.784511   |
| 1423.592442 | 3.386172   | 1.208294   |
| 1435.556960 | 30.328953  | 10.913296  |
| 1442.254268 | 52.364119  | 18.930135  |
| 1448.777481 | 62.875405  | 22.832873  |
| 1450.072857 | 137.989640 | 50.155016  |
| 1461.982826 | 283.843092 | 104.015646 |
| 1470.272006 | 10.771107  | 3.969503   |
| 1537.283556 | 104.036863 | 40.088453  |
| 1548.182768 | 96.004406  | 37.255592  |
| 1571.749043 | 394.657912 | 155.482705 |
| 1593.062409 | 99.057549  | 39.554731  |
| 2847.170151 | 89.208693  | 63.664696  |
| 2864.352668 | 101.685480 | 73.006832  |
| 2986.999439 | 93.636838  | 70.106769  |
| 2989.116224 | 20.048154  | 15.020876  |
| 3045.910913 | 19.340606  | 14.766085  |
| 3052.392380 | 19.306164  | 14.771154  |
| 3109.294533 | 16.492430  | 12.853594  |
| 3111.145135 | 1.649451   | 1.286287   |
| 3124.691964 | 1.365439   | 1.069443   |
| 3136.064903 | 5.215937   | 4.100110   |
| 3142.733535 | 1.297503   | 1.022102   |
| 3148.774772 | 2.123816   | 1.676241   |
| 3165.629912 | 0.506928   | 0.402239   |
| 3168.121509 | 0.517752   | 0.411152   |
| 3170.038500 | 1.573488   | 1.250277   |

Supplementary Material (ESI) for Chemical Communications  
This journal is (c) The Royal Society of Chemistry 2011

|             |          |          |
|-------------|----------|----------|
| 3178.883953 | 0.466909 | 0.372036 |
| 3185.790819 | 0.012266 | 0.009795 |
| 3195.876316 | 3.886203 | 3.113103 |

| Temp   |                                             | Transl | Rotat  | Vibrat  | Total   |
|--------|---------------------------------------------|--------|--------|---------|---------|
| ----   |                                             | -----  | -----  | -----   | -----   |
| 298.15 | Entropy (cal/mole-K):                       | 44.456 | 34.799 | 64.837  | 144.092 |
|        | Internal Energy (Kcal/mole):                | 0.889  | 0.889  | 203.566 | 205.344 |
|        | Constant Volume Heat Capacity (cal/mole-K): | 2.981  | 2.981  | 71.904  | 77.866  |

\*\*\*\*\*

## TS1-II

Geometry CYCLE 30

Energy gradients wrt nuclear displacements

| Atom  | Cartesian (a.u./angstrom) |           |           |
|-------|---------------------------|-----------|-----------|
|       | X                         | Y         | Z         |
| ----- |                           |           |           |
| 1 C   | 0.000014                  | 0.000011  | -0.000087 |
| 2 H   | 0.000019                  | 0.000004  | 0.000020  |
| 3 C   | 0.000030                  | 0.000028  | 0.000038  |
| 4 H   | -0.000010                 | -0.000014 | -0.000011 |
| 5 C   | 0.000028                  | 0.000028  | 0.000050  |
| 6 H   | -0.000010                 | -0.000004 | -0.000032 |
| 7 C   | -0.000008                 | -0.000047 | -0.000010 |
| 8 H   | 0.000005                  | 0.000010  | -0.000004 |
| 9 C   | -0.000075                 | 0.000107  | -0.000068 |
| 10 C  | 0.000086                  | -0.000070 | -0.000136 |
| 11 C  | -0.000140                 | -0.000089 | 0.000016  |
| 12 C  | -0.000002                 | -0.000030 | 0.000047  |
| 13 H  | 0.000005                  | 0.000002  | 0.000019  |
| 14 C  | 0.000094                  | 0.000005  | 0.000016  |
| 15 N  | -0.000029                 | 0.000017  | -0.000001 |
| 16 C  | -0.000044                 | -0.000019 | -0.000099 |
| 17 H  | 0.000013                  | 0.000002  | 0.000013  |
| 18 C  | 0.000010                  | 0.000016  | 0.000085  |
| 19 H  | -0.000012                 | 0.000004  | -0.000020 |
| 20 H  | 0.000012                  | -0.000002 | -0.000009 |
| 21 H  | -0.000003                 | -0.000005 | 0.000009  |
| 22 C  | -0.000025                 | 0.000028  | -0.000006 |
| 23 C  | 0.000120                  | -0.000288 | 0.000151  |
| 24 C  | -0.000750                 | -0.000314 | 0.000144  |
| 25 C  | 0.000297                  | 0.000120  | 0.000088  |
| 26 C  | 0.000037                  | -0.000048 | -0.000079 |
| 27 C  | -0.000090                 | -0.000085 | 0.000021  |
| 28 H  | 0.000014                  | -0.000028 | 0.000001  |
| 29 H  | -0.000009                 | 0.000006  | -0.000038 |
| 30 H  | -0.000011                 | 0.000044  | 0.000018  |
| 31 H  | -0.000034                 | 0.000035  | -0.000019 |
| 32 H  | -0.000003                 | -0.000022 | 0.000037  |
| 33 N  | -0.000243                 | -0.000365 | 0.000373  |
| 34 Ir | 0.000620                  | 0.000975  | -0.000555 |
| 35 H  | 0.000012                  | -0.000022 | -0.000002 |
| 36 H  | -0.000005                 | 0.000009  | -0.000011 |
| 37 H  | 0.000004                  | 0.000006  | 0.000006  |
| 38 H  | -0.000007                 | 0.000001  | 0.000014  |
| 39 Cl | 0.000098                  | -0.000013 | -0.000012 |
| 40 C  | -0.000008                 | 0.000010  | 0.000035  |
| ----- |                           |           |           |

Geometry Convergence after Step 30

|                          |                     |            |   |
|--------------------------|---------------------|------------|---|
| current energy           | -9.11314048 Hartree |            |   |
| energy change            | -0.00000955         | 0.00100000 | T |
| constrained gradient max | 0.00097515          | 0.00100000 | T |
| constrained gradient rms | 0.00015998          | 0.00066667 | T |
| gradient max             | 0.00097515          |            |   |
| gradient rms             | 0.00015998          |            |   |
| cart. step max           | 0.00580950          | 0.01000000 | T |
| cart. step rms           | 0.00190657          | 0.00666667 | T |

Summary of Bonding Energy (energy terms are taken from the energy decomposition above)

|                                 |                    |           |          |           |
|---------------------------------|--------------------|-----------|----------|-----------|
| Electrostatic Energy:           | -8.068336467598352 | -219.5506 | -5062.96 | -21183.41 |
| Kinetic Energy:                 | 10.257201732876013 | 279.1127  | 6436.49  | 26930.28  |
| Coulomb (Steric+OrbInt) Energy: | -2.703885129227857 | -73.5765  | -1696.71 | -7099.05  |
| XC Energy:                      | -8.598120732408098 | -233.9668 | -5395.40 | -22574.36 |
| -----                           |                    |           |          |           |
| Total Bonding Energy:           | -9.113140596358294 | -247.9812 | -5718.58 | -23926.55 |

List of All Frequencies:

Intensities

| Frequency<br>cm-1 | Dipole Strength<br>1e-40 esu2 cm2 | Absorption Intensity (degeneracy not counted)<br>km/mole |
|-------------------|-----------------------------------|----------------------------------------------------------|
| -----             |                                   |                                                          |
| -62.999543        | 4.480100                          | -0.070746                                                |
| 34.145302         | 35.820576                         | 0.306578                                                 |
| 50.607078         | 270.796335                        | 3.435043                                                 |
| 55.099454         | 126.027074                        | 1.740561                                                 |
| 91.742596         | 3.581405                          | 0.082357                                                 |
| 105.059095        | 22.965363                         | 0.604763                                                 |
| 117.447590        | 21.669508                         | 0.637927                                                 |
| 127.315322        | 34.498459                         | 1.100927                                                 |
| 142.295889        | 13.343215                         | 0.475917                                                 |
| 192.745410        | 6.426426                          | 0.310479                                                 |
| 202.186790        | 22.420447                         | 1.136253                                                 |
| 207.632993        | 0.999646                          | 0.052026                                                 |

Supplementary Material (ESI) for Chemical Communications  
This journal is (c) The Royal Society of Chemistry 2011

|             |            |            |
|-------------|------------|------------|
| 231.780643  | 16.425740  | 0.954290   |
| 235.026594  | 42.469749  | 2.501928   |
| 251.969034  | 8.507139   | 0.537290   |
| 259.554737  | 12.123888  | 0.788767   |
| 279.617590  | 54.228854  | 3.800782   |
| 302.714802  | 103.437318 | 7.848542   |
| 307.386367  | 130.972386 | 10.091191  |
| 335.467524  | 3.507916   | 0.294970   |
| 366.908185  | 31.586336  | 2.904924   |
| 371.719045  | 49.948954  | 4.653924   |
| 398.044399  | 7.597329   | 0.758002   |
| 431.381714  | 4.039022   | 0.436733   |
| 441.153024  | 45.684781  | 5.051715   |
| 449.315545  | 14.999633  | 1.689313   |
| 518.584871  | 22.409763  | 2.912964   |
| 523.283390  | 12.900517  | 1.692085   |
| 550.196911  | 27.085727  | 3.735397   |
| 566.579087  | 46.109593  | 6.548320   |
| 568.830906  | 35.144336  | 5.010910   |
| 622.804261  | 53.197172  | 8.304590   |
| 653.079506  | 9.315876   | 1.524993   |
| 676.080051  | 29.297557  | 4.964867   |
| 711.999217  | 136.293377 | 24.323851  |
| 717.193440  | 21.685033  | 3.898293   |
| 720.815420  | 277.424683 | 50.124175  |
| 755.883220  | 130.463000 | 24.718387  |
| 766.918603  | 196.429920 | 37.760261  |
| 789.903504  | 42.474082  | 8.409615   |
| 794.151286  | 82.801390  | 16.482343  |
| 809.070976  | 23.371658  | 4.739737   |
| 810.696306  | 5.765179   | 1.171518   |
| 819.617693  | 11.724782  | 2.408763   |
| 826.383155  | 137.939817 | 28.572561  |
| 833.411793  | 11.173901  | 2.334224   |
| 872.654623  | 37.892933  | 8.288552   |
| 875.668486  | 7.209235   | 1.582366   |
| 881.690579  | 14.863531  | 3.284856   |
| 902.559317  | 0.975858   | 0.220770   |
| 909.164611  | 0.673499   | 0.153482   |
| 936.154585  | 0.442400   | 0.103810   |
| 938.013499  | 364.694734 | 85.746549  |
| 965.797373  | 39.296365  | 9.512977   |
| 990.640539  | 27.872167  | 6.920937   |
| 1004.846604 | 61.018720  | 15.368834  |
| 1020.085445 | 24.554443  | 6.278338   |
| 1030.039007 | 40.596899  | 10.481528  |
| 1039.116694 | 17.973349  | 4.681353   |
| 1042.038123 | 15.761517  | 4.116799   |
| 1046.103808 | 14.476776  | 3.795987   |
| 1051.528161 | 52.533550  | 13.846363  |
| 1077.619433 | 18.705766  | 5.052647   |
| 1093.048970 | 50.001131  | 13.699273  |
| 1104.938074 | 3.881915   | 1.075133   |
| 1127.520498 | 184.176858 | 52.052019  |
| 1130.362758 | 3.802310   | 1.077317   |
| 1143.119136 | 25.732622  | 7.373159   |
| 1155.173361 | 12.203157  | 3.533438   |
| 1174.653248 | 42.740495  | 12.584249  |
| 1215.232890 | 46.842633  | 14.268519  |
| 1233.915194 | 0.054013   | 0.016706   |
| 1258.544396 | 20.013717  | 6.313561   |
| 1275.923865 | 27.365833  | 8.752084   |
| 1289.993435 | 29.822986  | 9.643101   |
| 1311.389079 | 88.107274  | 28.961523  |
| 1321.428268 | 27.596191  | 9.140518   |
| 1331.050470 | 8.739583   | 2.915838   |
| 1337.599484 | 0.863964   | 0.289667   |
| 1372.541803 | 29.171955  | 10.036197  |
| 1385.748320 | 17.791791  | 6.179909   |
| 1394.523864 | 1.842967   | 0.644201   |
| 1415.477049 | 71.988708  | 25.541434  |
| 1423.239980 | 11.541114  | 4.117219   |
| 1426.587132 | 5.367983   | 1.919497   |
| 1435.761689 | 23.709445  | 8.532608   |
| 1444.829864 | 106.709065 | 38.645247  |
| 1448.964484 | 25.115560  | 9.121761   |
| 1450.563784 | 76.004314  | 27.634597  |
| 1463.338976 | 298.409947 | 109.455177 |
| 1470.507095 | 34.195475  | 12.604158  |
| 1528.216063 | 59.885286  | 22.939448  |
| 1547.570226 | 83.372509  | 32.340841  |
| 1577.375743 | 490.779790 | 194.043857 |
| 1593.010499 | 116.646411 | 46.576633  |
| 2851.815088 | 70.534398  | 50.419716  |
| 2857.066680 | 180.763141 | 129.451869 |
| 2986.730212 | 80.421780  | 60.207106  |
| 2988.709799 | 16.498048  | 12.359315  |
| 3046.443135 | 20.799034  | 15.882334  |
| 3051.957978 | 20.564482  | 15.731654  |
| 3104.244187 | 10.220686  | 7.952689   |
| 3123.883531 | 8.498438   | 6.654448   |
| 3124.510510 | 0.167594   | 0.131256   |
| 3125.837973 | 8.691036   | 6.809513   |
| 3142.536979 | 1.060082   | 0.835022   |
| 3148.743389 | 2.298149   | 1.813817   |
| 3166.091750 | 0.612447   | 0.486038   |
| 3168.084786 | 0.612297   | 0.486224   |
| 3169.986235 | 1.774543   | 1.410009   |
| 3179.478104 | 0.387455   | 0.308785   |

Supplementary Material (ESI) for Chemical Communications  
 This journal is (c) The Royal Society of Chemistry 2011

|             |          |          |
|-------------|----------|----------|
| 3185.515228 | 0.141381 | 0.112888 |
| 3195.878720 | 3.774547 | 3.023662 |

| Temp   |                                             | Transl | Rotat  | Vibrat  | Total   |
|--------|---------------------------------------------|--------|--------|---------|---------|
| ----   |                                             | -----  | -----  | -----   | -----   |
| 298.15 | Entropy (cal/mole-K):                       | 44.456 | 34.874 | 64.816  | 144.146 |
|        | Internal Energy (Kcal/mole):                | 0.889  | 0.889  | 203.576 | 205.353 |
|        | Constant Volume Heat Capacity (cal/mole-K): | 2.981  | 2.981  | 71.894  | 77.856  |

# IV

Geometry CYCLE 7  
=====

Energy gradients wrt nuclear displacements  
=====

| Atom  | Cartesian (a.u./angstrom) |           |           |
|-------|---------------------------|-----------|-----------|
|       | X                         | Y         | Z         |
| 1 C   | -0.000007                 | 0.000077  | -0.000070 |
| 2 H   | -0.000043                 | -0.000024 | -0.000055 |
| 3 C   | 0.000004                  | 0.000035  | 0.000094  |
| 4 H   | 0.000052                  | 0.000005  | 0.000047  |
| 5 C   | -0.000050                 | -0.000068 | -0.000098 |
| 6 H   | -0.000040                 | 0.000010  | -0.000067 |
| 7 C   | 0.000121                  | -0.000006 | 0.000083  |
| 8 H   | 0.000020                  | 0.000010  | 0.000053  |
| 9 C   | -0.000196                 | 0.000121  | 0.000036  |
| 10 C  | 0.000040                  | 0.000002  | -0.000111 |
| 11 C  | -0.000149                 | -0.000274 | 0.000348  |
| 12 C  | 0.000178                  | -0.000094 | -0.000071 |
| 13 H  | -0.000047                 | -0.000017 | 0.000012  |
| 14 C  | -0.000364                 | 0.000153  | -0.000117 |
| 15 N  | 0.000132                  | -0.000033 | 0.000021  |
| 16 C  | 0.000009                  | 0.000041  | -0.000001 |
| 17 H  | 0.000000                  | -0.000010 | -0.000028 |
| 18 C  | -0.000068                 | 0.000080  | 0.000021  |
| 19 H  | 0.000021                  | 0.000012  | 0.000021  |
| 20 Cl | 0.000188                  | 0.000051  | 0.000050  |
| 21 C  | -0.000125                 | -0.000005 | 0.000052  |
| 22 C  | 0.000097                  | 0.000148  | -0.000207 |
| 23 C  | 0.000056                  | 0.000000  | -0.000008 |
| 24 C  | 0.000199                  | 0.000118  | 0.000091  |
| 25 C  | -0.000126                 | 0.000043  | 0.000054  |
| 26 H  | 0.000015                  | -0.000002 | 0.000022  |
| 27 H  | -0.000015                 | -0.000016 | 0.000011  |
| 28 H  | 0.000010                  | 0.000030  | -0.000055 |
| 29 H  | -0.000005                 | 0.000037  | -0.000008 |
| 30 H  | -0.000008                 | -0.000009 | 0.000020  |
| 31 N  | 0.000045                  | -0.000098 | 0.000107  |
| 32 Ir | -0.000245                 | -0.000370 | -0.000166 |
| 33 C  | -0.000026                 | -0.000048 | 0.000022  |
| 34 H  | 0.000007                  | 0.000029  | -0.000036 |
| 35 H  | -0.000009                 | 0.000037  | -0.000030 |
| 36 H  | 0.000004                  | -0.000023 | 0.000009  |
| 37 C  | 0.000080                  | 0.000049  | -0.000022 |
| 38 H  | -0.000044                 | -0.000032 | -0.000020 |
| 39 H  | -0.000043                 | -0.000042 | -0.000015 |
| 40 H  | 0.000016                  | -0.000006 | 0.000012  |
| 41 Ru | 0.000134                  | 0.000099  | -0.000080 |
| 42 C  | 0.000042                  | 0.000093  | 0.000032  |
| 43 C  | 0.000077                  | -0.000065 | -0.000112 |
| 44 C  | 0.000152                  | -0.000091 | -0.000039 |
| 45 C  | -0.000102                 | -0.000079 | 0.000115  |
| 46 C  | 0.000062                  | 0.000116  | 0.000088  |
| 47 H  | 0.000007                  | 0.000023  | -0.000012 |
| 48 H  | 0.000010                  | 0.000001  | -0.000009 |
| 49 H  | -0.000026                 | 0.000005  | 0.000019  |
| 50 H  | 0.000000                  | -0.000011 | 0.000010  |
| 51 H  | -0.000041                 | -0.000001 | -0.000015 |

-----  
Geometry Convergence after Step 7  
-----

|                          |            |                      |   |
|--------------------------|------------|----------------------|---|
| current energy           |            | -11.48437019 Hartree |   |
| abs of energy change     | 0.00000311 | 0.00100000           | T |
| constrained gradient max | 0.00036978 | 0.00100000           | T |
| constrained gradient rms | 0.00009132 | 0.00066667           | T |
| gradient max             | 0.00036978 |                      |   |
| gradient rms             | 0.00009132 |                      |   |
| cart. step max           | 0.00895224 | 0.01000000           | T |
| cart. step rms           | 0.00229212 | 0.00666667           | T |

Number of elements of the density matrix on this node (used, total): 35923 264628

Summary of Bonding Energy (energy terms are taken from the energy decomposition above)  
=====

|                                 |                     |           |          |           |
|---------------------------------|---------------------|-----------|----------|-----------|
| Electrostatic Energy:           | -10.731117243576886 | -292.0086 | -6733.88 | -28174.54 |
| Kinetic Energy:                 | 12.646203372343393  | 344.1207  | 7935.61  | 33202.60  |
| Coulomb (Steric+OrbInt) Energy: | -2.692056743742128  | -73.2546  | -1689.29 | -7067.99  |
| XC Energy:                      | -10.707400426287801 | -291.3632 | -6719.00 | -28112.28 |
| -----                           |                     |           |          |           |
| Total Bonding Energy:           | -11.484371041263422 | -312.5056 | -7206.55 | -30152.21 |

List of All Frequencies:

Intensities

=====

| Frequency<br>cm <sup>-1</sup> | Dipole Strength<br>1e-40 esu <sup>2</sup> cm <sup>2</sup> | Absorption Intensity (degeneracy not counted)<br>km/mole |
|-------------------------------|-----------------------------------------------------------|----------------------------------------------------------|
| -----                         | -----                                                     | -----                                                    |
| 34.981966                     | 177.324048                                                | 1.554855                                                 |
| 49.865766                     | 188.461418                                                | 2.355608                                                 |
| 54.624282                     | 171.918297                                                | 2.353889                                                 |
| 59.404928                     | 117.416684                                                | 1.748358                                                 |
| 70.351648                     | 0.389687                                                  | 0.006872                                                 |
| 80.511578                     | 54.221399                                                 | 1.094226                                                 |
| 94.479077                     | 27.489441                                                 | 0.650998                                                 |
| 108.844115                    | 49.600766                                                 | 1.353229                                                 |
| 122.515121                    | 34.655042                                                 | 1.064227                                                 |
| 125.656998                    | 35.506807                                                 | 1.118346                                                 |
| 135.045121                    | 88.259722                                                 | 2.987580                                                 |
| 144.921108                    | 89.784541                                                 | 3.261454                                                 |
| 156.325331                    | 48.758296                                                 | 1.910539                                                 |
| 169.294353                    | 197.384622                                                | 8.375946                                                 |
| 192.841355                    | 84.416333                                                 | 4.080419                                                 |
| 224.415003                    | 34.191226                                                 | 1.923289                                                 |
| 239.224284                    | 35.348297                                                 | 2.119590                                                 |
| 248.660374                    | 115.292120                                                | 7.185951                                                 |
| 263.724583                    | 156.575057                                                | 10.350260                                                |
| 282.523509                    | 3.199119                                                  | 0.226549                                                 |
| 298.455763                    | 12.788078                                                 | 0.956673                                                 |
| 306.451631                    | 170.144458                                                | 13.069465                                                |
| 324.829455                    | 4.260283                                                  | 0.346874                                                 |
| 331.658652                    | 46.689902                                                 | 3.881435                                                 |
| 343.713829                    | 17.077794                                                 | 1.471319                                                 |
| 359.956010                    | 43.516281                                                 | 3.926262                                                 |
| 373.253831                    | 143.903656                                                | 13.463382                                                |
| 377.288753                    | 230.471193                                                | 21.795587                                                |
| 381.172644                    | 32.175305                                                 | 3.074132                                                 |
| 391.258833                    | 115.371275                                                | 11.314619                                                |
| 437.693415                    | 21.623920                                                 | 2.372370                                                 |
| 441.982385                    | 9.848739                                                  | 1.091098                                                 |
| 468.544525                    | 113.110652                                                | 13.284109                                                |
| 486.872378                    | 51.951272                                                 | 6.340002                                                 |
| 513.231690                    | 68.468161                                                 | 8.808059                                                 |
| 528.735617                    | 54.289362                                                 | 7.195010                                                 |
| 552.304382                    | 44.442893                                                 | 6.152603                                                 |
| 563.842931                    | 38.649510                                                 | 5.462359                                                 |
| 566.628283                    | 13.252201                                                 | 1.882194                                                 |
| 568.719638                    | 8.867961                                                  | 1.264154                                                 |
| 572.453777                    | 16.475765                                                 | 2.364090                                                 |
| 581.486176                    | 177.880624                                                | 25.926632                                                |
| 639.244864                    | 95.566523                                                 | 15.312676                                                |
| 650.376959                    | 41.957061                                                 | 6.839877                                                 |
| 666.247391                    | 17.615817                                                 | 2.941822                                                 |
| 717.022652                    | 22.851878                                                 | 4.107077                                                 |
| 729.718766                    | 147.056370                                                | 26.897841                                                |
| 755.416314                    | 247.112322                                                | 46.790623                                                |
| 791.891595                    | 81.666062                                                 | 16.210090                                                |
| 795.444691                    | 186.059342                                                | 37.097064                                                |
| 804.488508                    | 11.328595                                                 | 2.284410                                                 |
| 811.144287                    | 121.164246                                                | 24.634892                                                |
| 816.771332                    | 154.226337                                                | 31.574545                                                |
| 820.021624                    | 29.265360                                                 | 6.015299                                                 |
| 820.991617                    | 23.259246                                                 | 4.786438                                                 |
| 822.313270                    | 98.715520                                                 | 20.347020                                                |
| 826.773677                    | 83.225819                                                 | 17.247366                                                |
| 832.372145                    | 22.406661                                                 | 4.674905                                                 |
| 839.439447                    | 116.891892                                                | 24.595284                                                |
| 840.918245                    | 29.847665                                                 | 6.291326                                                 |
| 847.263335                    | 3.471213                                                  | 0.737187                                                 |
| 867.543991                    | 4.619105                                                  | 1.004448                                                 |
| 878.763390                    | 4.852401                                                  | 1.068825                                                 |
| 890.508229                    | 6.008052                                                  | 1.341065                                                 |
| 892.726913                    | 12.778975                                                 | 2.859517                                                 |
| 895.128650                    | 15.274220                                                 | 3.427067                                                 |
| 898.524534                    | 5.431317                                                  | 1.223244                                                 |
| 920.986227                    | 1.589424                                                  | 0.366920                                                 |
| 935.470216                    | 94.926108                                                 | 22.258388                                                |
| 950.409811                    | 0.060646                                                  | 0.014447                                                 |
| 971.349481                    | 37.292425                                                 | 9.079757                                                 |
| 989.881148                    | 60.104308                                                 | 14.913059                                                |
| 990.635279                    | 47.335297                                                 | 11.753764                                                |
| 991.514068                    | 7.576858                                                  | 1.883068                                                 |
| 992.898096                    | 61.873614                                                 | 15.398848                                                |
| 1012.278407                   | 36.207255                                                 | 9.186998                                                 |
| 1038.447535                   | 33.358796                                                 | 8.683064                                                 |
| 1044.002735                   | 1.600468                                                  | 0.418819                                                 |
| 1046.648866                   | 29.779959                                                 | 7.812737                                                 |
| 1047.979904                   | 34.615276                                                 | 9.092825                                                 |
| 1049.105095                   | 6.370427                                                  | 1.675196                                                 |
| 1050.361984                   | 11.038184                                                 | 2.906128                                                 |
| 1053.750831                   | 26.233058                                                 | 6.928910                                                 |
| 1090.577887                   | 2.686029                                                  | 0.734252                                                 |
| 1096.168660                   | 31.259263                                                 | 8.588833                                                 |
| 1104.496083                   | 27.924794                                                 | 7.730939                                                 |
| 1105.001064                   | 11.646397                                                 | 3.225762                                                 |
| 1111.839244                   | 128.646127                                                | 35.852281                                                |
| 1120.033465                   | 2.765465                                                  | 0.776385                                                 |
| 1161.139498                   | 45.274106                                                 | 13.176873                                                |
| 1163.141613                   | 11.057151                                                 | 3.223695                                                 |
| 1211.046231                   | 91.937265                                                 | 27.908107                                                |
| 1218.057226                   | 41.751058                                                 | 12.747154                                                |
| 1235.448751                   | 0.108841                                                  | 0.033705                                                 |

Supplementary Material (ESI) for Chemical Communications  
This journal is (c) The Royal Society of Chemistry 2011

|             |             |            |
|-------------|-------------|------------|
| 1236.177856 | 0.078548    | 0.024339   |
| 1272.161456 | 6.107847    | 1.947639   |
| 1286.348472 | 3.529783    | 1.138111   |
| 1300.821580 | 34.658192   | 11.300605  |
| 1332.762185 | 182.892832  | 61.098059  |
| 1334.712076 | 9.399784    | 3.144731   |
| 1342.209001 | 3.092484    | 1.040413   |
| 1351.101187 | 3.776348    | 1.278904   |
| 1355.330866 | 6.421706    | 2.181594   |
| 1358.661938 | 7.268622    | 2.475378   |
| 1368.645335 | 2.834498    | 0.972401   |
| 1390.537899 | 23.971981   | 8.355353   |
| 1397.768583 | 144.243594  | 50.537049  |
| 1405.202779 | 4.837361    | 1.703827   |
| 1406.177371 | 37.509237   | 13.220760  |
| 1407.464221 | 15.088408   | 5.323029   |
| 1423.393494 | 10.389940   | 3.706945   |
| 1432.734342 | 112.999802  | 40.580877  |
| 1441.928900 | 6.435939    | 2.326129   |
| 1448.505109 | 11.118070   | 4.036710   |
| 1451.834069 | 100.985423  | 36.749695  |
| 1461.244621 | 125.377256  | 45.921890  |
| 1463.925071 | 7.812389    | 2.866690   |
| 1481.788370 | 132.056183  | 49.048191  |
| 1491.551347 | 58.379175   | 21.826004  |
| 1538.603816 | 1067.186536 | 411.571423 |
| 1554.611682 | 6.188206    | 2.411375   |
| 1596.096299 | 54.362307   | 21.748787  |
| 2936.631495 | 55.548820   | 40.888611  |
| 2941.973076 | 54.920979   | 40.500001  |
| 3033.033271 | 15.826685   | 12.032205  |
| 3035.681360 | 9.846145    | 7.492047   |
| 3082.192185 | 1.080216    | 0.834542   |
| 3088.989776 | 7.857376    | 6.083760   |
| 3125.873221 | 2.215598    | 1.735963   |
| 3133.493870 | 1.293574    | 1.016011   |
| 3147.230046 | 2.010971    | 1.586399   |
| 3147.519274 | 1.680839    | 1.326089   |
| 3152.601104 | 0.883606    | 0.698242   |
| 3153.783494 | 4.627109    | 3.657797   |
| 3158.833117 | 0.179279    | 0.141950   |
| 3165.123192 | 0.074570    | 0.059160   |
| 3167.893481 | 0.659812    | 0.523925   |
| 3172.437642 | 0.760943    | 0.605094   |
| 3174.720739 | 1.135115    | 0.903282   |
| 3174.802739 | 0.245262    | 0.195175   |
| 3176.665449 | 0.682764    | 0.543651   |
| 3182.617265 | 4.056830    | 3.236304   |
| 3188.678531 | 1.906924    | 1.524130   |
| 3188.803828 | 2.103330    | 1.681176   |
| 3198.505604 | 1.712191    | 1.372706   |

| Temp   |                                             | Transl | Rotat  | Vibrat  | Total   |
|--------|---------------------------------------------|--------|--------|---------|---------|
| ----   |                                             | -----  | -----  | -----   | -----   |
| 298.15 | Entropy (cal/mole-K):                       | 45.330 | 36.105 | 88.929  | 170.364 |
|        | Internal Energy (Kcal/mole):                | 0.889  | 0.889  | 261.060 | 262.837 |
|        | Constant Volume Heat Capacity (cal/mole-K): | 2.981  | 2.981  | 95.890  | 101.852 |

\*\*\*\*\*

# TS1-IV

Geometry CYCLE 25

Energy gradients wrt nuclear displacements

| Atom  | Cartesian (a.u./angstrom) |           |           |
|-------|---------------------------|-----------|-----------|
|       | X                         | Y         | Z         |
| 1 C   | -0.000106                 | -0.000075 | 0.000036  |
| 2 H   | 0.000004                  | -0.000003 | 0.000000  |
| 3 C   | 0.000055                  | 0.000035  | 0.000014  |
| 4 H   | 0.000006                  | 0.000040  | -0.000001 |
| 5 C   | -0.000039                 | -0.000028 | -0.000019 |
| 6 H   | -0.000029                 | -0.000046 | 0.000019  |
| 7 C   | 0.000000                  | 0.000023  | -0.000005 |
| 8 H   | 0.000025                  | 0.000030  | -0.000004 |
| 9 C   | 0.000025                  | -0.000008 | -0.000007 |
| 10 C  | -0.000023                 | 0.000059  | -0.000010 |
| 11 C  | -0.000128                 | -0.000109 | -0.000145 |
| 12 C  | -0.000105                 | 0.000027  | 0.000133  |
| 13 H  | 0.000026                  | -0.000037 | 0.000000  |
| 14 C  | 0.000229                  | -0.000163 | -0.000007 |
| 15 N  | -0.000159                 | 0.000142  | -0.000069 |
| 16 C  | -0.000253                 | 0.000008  | 0.000157  |
| 17 H  | 0.000013                  | 0.000012  | -0.000038 |
| 18 C  | 0.000342                  | 0.000156  | 0.000094  |
| 19 H  | 0.000002                  | 0.000013  | 0.000023  |
| 20 Cl | -0.000020                 | -0.000033 | 0.000074  |
| 21 C  | 0.000047                  | -0.000017 | 0.000046  |
| 22 C  | -0.000064                 | 0.000016  | -0.000007 |
| 23 C  | -0.000052                 | -0.000043 | 0.000021  |
| 24 C  | 0.000035                  | 0.000062  | 0.000053  |
| 25 C  | 0.000034                  | 0.000065  | 0.000069  |
| 26 H  | -0.000009                 | -0.000010 | -0.000008 |
| 27 H  | -0.000016                 | 0.000003  | -0.000009 |
| 28 H  | 0.000007                  | 0.000013  | 0.000006  |
| 29 H  | 0.000009                  | 0.000020  | -0.000005 |
| 30 H  | 0.000000                  | 0.000008  | 0.000008  |
| 31 N  | 0.000211                  | 0.000018  | 0.000001  |
| 32 Ir | -0.000080                 | 0.000041  | -0.000259 |
| 33 C  | -0.000027                 | -0.000051 | -0.000009 |
| 34 H  | -0.000005                 | 0.000019  | 0.000009  |
| 35 H  | 0.000000                  | -0.000014 | 0.000023  |
| 36 H  | -0.000013                 | -0.000010 | -0.000010 |
| 37 C  | 0.000076                  | -0.000061 | 0.000002  |
| 38 H  | 0.000011                  | 0.000005  | 0.000001  |
| 39 H  | 0.000007                  | 0.000064  | -0.000040 |
| 40 H  | 0.000011                  | -0.000006 | 0.000008  |
| 41 Ru | -0.000406                 | -0.000415 | -0.000239 |
| 42 C  | 0.000097                  | -0.000022 | 0.000017  |
| 43 C  | 0.000047                  | -0.000021 | 0.000021  |
| 44 C  | 0.000033                  | 0.000052  | -0.000065 |
| 45 C  | 0.000155                  | 0.000163  | -0.000026 |
| 46 C  | 0.000020                  | 0.000089  | 0.000114  |
| 47 H  | 0.000012                  | -0.000019 | -0.000013 |
| 48 H  | 0.000035                  | -0.000008 | -0.000008 |
| 49 H  | -0.000010                 | -0.000015 | 0.000018  |
| 50 H  | -0.000023                 | 0.000018  | 0.000038  |
| 51 H  | -0.000004                 | 0.000014  | -0.000004 |

Geometry Convergence after Step 25

|                          |                      |            |   |
|--------------------------|----------------------|------------|---|
| current energy           | -11.46684707 Hartree |            |   |
| abs of energy change     | 0.00001437           | 0.00100000 | T |
| constrained gradient max | 0.00041533           | 0.00100000 | T |
| constrained gradient rms | 0.00008718           | 0.00066667 | T |
| gradient max             | 0.00041533           |            |   |
| gradient rms             | 0.00008718           |            |   |
| cart. step max           | 0.00744534           | 0.01000000 | T |
| cart. step rms           | 0.00252766           | 0.00666667 | T |

Summary of Bonding Energy (energy terms are taken from the energy decomposition above)

|                                 |                     |           |          |           |
|---------------------------------|---------------------|-----------|----------|-----------|
| Electrostatic Energy:           | -10.701576987020477 | -291.2047 | -6715.34 | -28096.99 |
| Kinetic Energy:                 | 12.618572850690242  | 343.3688  | 7918.27  | 33130.06  |
| Coulomb (Steric+OrbInt) Energy: | -2.698666559238063  | -73.4345  | -1693.44 | -7085.35  |
| XC Energy:                      | -10.685174533770104 | -290.7584 | -6705.05 | -28053.92 |
| Total Bonding Energy:           | -11.466845229338402 | -312.0287 | -7195.55 | -30106.20 |

List of All Frequencies:

Intensities

| Frequency<br>cm-1 | Dipole Strength<br>1e-40 esu2 cm2 | Absorption Intensity (degeneracy not counted)<br>km/mole |
|-------------------|-----------------------------------|----------------------------------------------------------|
| -97.337607        | 38.865142                         | -0.948242                                                |
| 34.896247         | 57.589986                         | 0.503737                                                 |

Supplementary Material (ESI) for Chemical Communications  
This journal is (c) The Royal Society of Chemistry 2011

|             |            |           |
|-------------|------------|-----------|
| 55.658226   | 198.572798 | 2.770302  |
| 68.499140   | 11.711029  | 0.201075  |
| 75.258608   | 113.444689 | 2.140023  |
| 94.553572   | 44.111224  | 1.045454  |
| 101.909500  | 15.118749  | 0.386197  |
| 111.454191  | 30.699791  | 0.857650  |
| 123.919014  | 60.749421  | 1.886940  |
| 129.047636  | 42.934940  | 1.388798  |
| 153.070050  | 37.348652  | 1.432990  |
| 175.344711  | 90.238968  | 3.966111  |
| 191.163440  | 15.073124  | 0.722248  |
| 199.854200  | 26.198441  | 1.312402  |
| 215.480764  | 6.112313   | 0.330135  |
| 228.775274  | 12.144436  | 0.696409  |
| 231.865969  | 4.124228   | 0.239694  |
| 243.765764  | 186.543259 | 11.398044 |
| 253.449864  | 50.757062  | 3.224531  |
| 274.266475  | 62.501541  | 4.296764  |
| 284.221146  | 35.123778  | 2.502279  |
| 305.690905  | 165.116737 | 12.651782 |
| 322.530941  | 16.693512  | 1.349575  |
| 331.685234  | 27.575930  | 2.292632  |
| 344.019763  | 4.528203   | 0.390470  |
| 367.842288  | 45.848334  | 4.227302  |
| 373.015794  | 76.447432  | 7.147731  |
| 378.390995  | 233.286184 | 22.126253 |
| 384.980501  | 33.247982  | 3.208353  |
| 393.890761  | 49.130394  | 4.850697  |
| 407.947200  | 89.749329  | 9.177264  |
| 441.907918  | 15.393308  | 1.705068  |
| 448.417027  | 63.136214  | 7.096410  |
| 470.610600  | 188.881269 | 22.280692 |
| 516.009735  | 46.376106  | 5.998329  |
| 522.242816  | 67.249214  | 8.803143  |
| 552.341336  | 41.807784  | 5.788190  |
| 559.734101  | 53.112104  | 7.451665  |
| 564.122217  | 33.538574  | 4.742375  |
| 568.419564  | 4.874709   | 0.694538  |
| 572.662058  | 5.148983   | 0.739091  |
| 610.814783  | 26.353404  | 4.034822  |
| 647.237017  | 24.311649  | 3.944172  |
| 666.422002  | 23.817744  | 3.978579  |
| 685.377108  | 20.714719  | 3.558662  |
| 713.351458  | 22.440457  | 4.012484  |
| 730.580318  | 156.787170 | 28.711545 |
| 757.408000  | 204.611671 | 38.845289 |
| 793.261034  | 54.332040  | 10.803145 |
| 796.580933  | 187.115154 | 37.360866 |
| 806.963432  | 7.018414   | 1.419616  |
| 819.774602  | 3.127301   | 0.642602  |
| 820.439659  | 5.389114   | 1.108261  |
| 821.602424  | 23.547291  | 4.849319  |
| 825.531865  | 438.419395 | 90.719714 |
| 828.441090  | 76.347222  | 15.853784 |
| 830.214427  | 2.529063   | 0.526293  |
| 842.771681  | 103.736871 | 21.913974 |
| 845.544835  | 19.254072  | 4.080725  |
| 845.921346  | 6.920782   | 1.467450  |
| 854.866500  | 23.740345  | 5.087019  |
| 895.269804  | 3.685721   | 0.827093  |
| 896.495464  | 7.693339   | 1.728785  |
| 897.828044  | 25.913002  | 5.831617  |
| 902.217935  | 5.924440   | 1.339790  |
| 904.314955  | 30.635824  | 6.944282  |
| 907.915851  | 1.182990   | 0.269218  |
| 921.268807  | 1.942851   | 0.448646  |
| 931.450408  | 238.824813 | 55.759292 |
| 951.614717  | 0.066920   | 0.015962  |
| 971.845523  | 35.900003  | 8.745201  |
| 991.574970  | 32.283236  | 8.023811  |
| 991.981743  | 20.748354  | 5.158998  |
| 993.447021  | 23.358882  | 5.816676  |
| 996.289073  | 73.003160  | 18.230773 |
| 1008.897846 | 34.048445  | 8.610385  |
| 1027.619985 | 36.093889  | 9.297031  |
| 1032.637850 | 42.249628  | 10.935761 |
| 1045.095762 | 1.684690   | 0.441321  |
| 1047.042977 | 0.655439   | 0.172018  |
| 1049.670638 | 4.396628   | 1.156780  |
| 1051.017856 | 20.658899  | 5.442461  |
| 1053.018946 | 10.212704  | 2.695597  |
| 1078.635187 | 9.359487   | 2.530491  |
| 1095.521564 | 8.691686   | 2.386728  |
| 1097.080833 | 29.444468  | 8.096930  |
| 1106.975915 | 27.610262  | 7.661023  |
| 1111.012699 | 0.749888   | 0.208830  |
| 1120.722852 | 201.272505 | 56.540644 |
| 1138.941129 | 8.928426   | 2.548909  |
| 1163.334010 | 5.909606   | 1.723221  |
| 1177.789498 | 38.099730  | 11.247802 |
| 1195.535073 | 42.452612  | 12.721690 |
| 1235.383105 | 0.529025   | 0.163816  |
| 1236.802298 | 0.041122   | 0.012748  |
| 1262.454673 | 22.762658  | 7.203057  |
| 1271.419757 | 46.114786  | 14.696273 |
| 1281.262506 | 5.173970   | 1.661652  |
| 1298.555973 | 35.554872  | 11.572784 |
| 1320.881229 | 14.895420  | 4.931677  |
| 1336.581333 | 4.884929   | 1.636559  |

Supplementary Material (ESI) for Chemical Communications  
This journal is (c) The Royal Society of Chemistry 2011

|             |            |            |
|-------------|------------|------------|
| 1342.320264 | 3.056336   | 1.028337   |
| 1346.235469 | 5.679166   | 1.916389   |
| 1360.714079 | 14.394814  | 4.909655   |
| 1364.010301 | 1.498758   | 0.512421   |
| 1383.031699 | 138.598943 | 48.047426  |
| 1391.163934 | 26.378942  | 9.198431   |
| 1399.419472 | 9.967778   | 3.496426   |
| 1406.277276 | 16.581714  | 5.844918   |
| 1407.700096 | 27.851800  | 9.827464   |
| 1423.755719 | 12.406948  | 4.427703   |
| 1426.668784 | 11.620211  | 4.155423   |
| 1434.359362 | 73.470116  | 26.414766  |
| 1440.840592 | 24.840762  | 8.971373   |
| 1447.012844 | 39.657060  | 14.383712  |
| 1451.432872 | 56.454966  | 20.538900  |
| 1457.576322 | 127.531968 | 46.593833  |
| 1466.403950 | 26.718930  | 9.820888   |
| 1476.964854 | 28.870622  | 10.688195  |
| 1494.131922 | 345.794191 | 129.504455 |
| 1555.067946 | 6.075022   | 2.367965   |
| 1596.263407 | 33.188901  | 13.279310  |
| 2881.264695 | 55.585936  | 40.144509  |
| 2887.096420 | 105.084757 | 76.046474  |
| 3013.311839 | 17.551399  | 13.256653  |
| 3020.011556 | 20.563854  | 15.566507  |
| 3063.433677 | 7.288020   | 5.596237   |
| 3087.471132 | 12.587290  | 9.741217   |
| 3115.390324 | 1.274415   | 0.995180   |
| 3126.355458 | 0.521816   | 0.408916   |
| 3127.781127 | 1.466229   | 1.149519   |
| 3134.481407 | 1.466633   | 1.152299   |
| 3147.384183 | 2.251421   | 1.776170   |
| 3154.260097 | 4.114219   | 3.252842   |
| 3160.564265 | 0.048641   | 0.038534   |
| 3166.744096 | 0.139451   | 0.110691   |
| 3168.724411 | 0.612679   | 0.486626   |
| 3172.358212 | 0.811492   | 0.645274   |
| 3176.002867 | 0.497781   | 0.396276   |
| 3176.246190 | 0.560523   | 0.446258   |
| 3177.170957 | 3.094330   | 2.464253   |
| 3182.428971 | 4.834662   | 3.856585   |
| 3189.378386 | 4.067111   | 3.251398   |
| 3189.467719 | 1.724812   | 1.378917   |
| 3198.859035 | 1.415275   | 1.134786   |

| Temp   |                                             | Transl | Rotat  | Vibrat  | Total   |
|--------|---------------------------------------------|--------|--------|---------|---------|
| ----   |                                             | -----  | -----  | -----   | -----   |
| 298.15 | Entropy (cal/mole-K):                       | 45.330 | 36.113 | 81.871  | 163.314 |
|        | Internal Energy (Kcal/mole):                | 0.889  | 0.889  | 259.886 | 261.663 |
|        | Constant Volume Heat Capacity (cal/mole-K): | 2.981  | 2.981  | 93.756  | 99.717  |

\*\*\*\*\*

## TS2-IV

Geometry CYCLE 62

Energy gradients wrt nuclear displacements

| Atom  | Cartesian (a.u./angstrom) |           |           |
|-------|---------------------------|-----------|-----------|
|       | X                         | Y         | Z         |
| 1 C   | 0.000055                  | 0.000014  | 0.000002  |
| 2 H   | -0.000004                 | -0.000089 | 0.000021  |
| 3 C   | -0.000022                 | -0.000088 | 0.000020  |
| 4 H   | 0.000017                  | -0.000014 | 0.000006  |
| 5 C   | 0.000053                  | 0.000045  | -0.000015 |
| 6 H   | 0.000012                  | 0.000035  | -0.000011 |
| 7 C   | -0.000085                 | -0.000136 | 0.000042  |
| 8 H   | 0.000039                  | 0.000078  | 0.000019  |
| 9 C   | 0.000179                  | 0.000267  | -0.000086 |
| 10 C  | -0.000183                 | -0.000733 | 0.000286  |
| 11 C  | 0.000303                  | 0.000206  | 0.000123  |
| 12 C  | -0.000087                 | -0.000127 | 0.000043  |
| 13 H  | 0.000062                  | 0.000060  | -0.000010 |
| 14 C  | -0.000300                 | -0.000094 | 0.000206  |
| 15 N  | -0.000113                 | 0.000083  | -0.000410 |
| 16 C  | 0.000002                  | 0.000169  | 0.000009  |
| 17 H  | 0.000005                  | -0.000077 | 0.000039  |
| 18 C  | 0.000161                  | 0.000607  | -0.000199 |
| 19 H  | -0.000056                 | -0.000111 | -0.000005 |
| 20 Cl | 0.000109                  | -0.000079 | -0.000149 |
| 21 C  | 0.000052                  | 0.000099  | 0.000016  |
| 22 C  | 0.000103                  | 0.000031  | -0.000053 |
| 23 C  | 0.000091                  | 0.000007  | -0.000027 |
| 24 C  | 0.000071                  | 0.000010  | -0.000063 |
| 25 C  | 0.000050                  | 0.000030  | -0.000027 |
| 26 H  | -0.000013                 | 0.000005  | 0.000005  |
| 27 H  | 0.000057                  | 0.000061  | 0.000035  |
| 28 H  | 0.000008                  | 0.000030  | 0.000004  |
| 29 H  | -0.000092                 | -0.000045 | -0.000017 |
| 30 H  | -0.000110                 | -0.000051 | -0.000034 |
| 31 N  | 0.000195                  | 0.000087  | -0.000072 |
| 32 Ir | -0.000844                 | -0.000119 | 0.000453  |
| 33 C  | -0.000404                 | -0.000448 | 0.000573  |
| 34 H  | -0.000097                 | 0.000207  | -0.000315 |
| 35 H  | 0.000146                  | 0.000101  | -0.000033 |
| 36 H  | 0.000282                  | -0.000067 | -0.000179 |
| 37 C  | 0.000170                  | -0.000138 | 0.000052  |
| 38 H  | 0.000181                  | 0.000089  | 0.000255  |
| 39 H  | 0.000006                  | 0.000222  | -0.000195 |
| 40 H  | 0.000056                  | -0.000113 | -0.000027 |
| 41 Ru | 0.000270                  | -0.000261 | -0.000876 |
| 42 C  | -0.000086                 | -0.000128 | 0.000043  |
| 43 C  | 0.000092                  | 0.000150  | 0.000088  |
| 44 C  | 0.000070                  | 0.000173  | 0.000133  |
| 45 C  | 0.000011                  | 0.000133  | 0.000119  |
| 46 C  | -0.000190                 | -0.000017 | 0.000099  |
| 47 H  | -0.000028                 | -0.000002 | 0.000032  |
| 48 H  | -0.000079                 | -0.000007 | 0.000025  |
| 49 H  | -0.000068                 | -0.000029 | -0.000011 |
| 50 H  | -0.000022                 | -0.000048 | 0.000016  |
| 51 H  | -0.000028                 | 0.000023  | 0.000045  |

Geometry Convergence after Step 62

|                          |             |            |   |                      |
|--------------------------|-------------|------------|---|----------------------|
| current energy           |             |            |   | -11.46704846 Hartree |
| energy change            | -0.00001040 | 0.00100000 | T |                      |
| constrained gradient max | 0.00087621  | 0.00100000 | T |                      |
| constrained gradient rms | 0.00018627  | 0.00066667 | T |                      |
| gradient max             | 0.00087621  |            |   |                      |
| gradient rms             | 0.00018627  |            |   |                      |
| cart. step max           | 0.00523537  | 0.01000000 | T |                      |
| cart. step rms           | 0.00135406  | 0.00666667 | T |                      |

Summary of Bonding Energy (energy terms are taken from the energy decomposition above)

|                                 |                     |           |          |           |
|---------------------------------|---------------------|-----------|----------|-----------|
| Electrostatic Energy:           | -10.701620493014072 | -291.2059 | -6715.37 | -28097.10 |
| Kinetic Energy:                 | 12.627798232256140  | 343.6199  | 7924.06  | 33154.28  |
| Coulomb (Steric+OrbInt) Energy: | -2.708304865198770  | -73.6967  | -1699.49 | -7110.65  |
| XC Energy:                      | -10.684921618175501 | -290.7515 | -6704.89 | -28053.26 |
| Total Bonding Energy:           | -11.467048744132203 | -312.0343 | -7195.68 | -30106.73 |

List of All Frequencies:

Intensities  
=====

| Frequency<br>cm-1 | Dipole Strength<br>1e-40 esu2 cm2 | Absorption Intensity (degeneracy not counted)<br>km/mole |
|-------------------|-----------------------------------|----------------------------------------------------------|
|-------------------|-----------------------------------|----------------------------------------------------------|

|             |            |           |
|-------------|------------|-----------|
| -81.170651  | 25.404491  | -0.516877 |
| 36.042691   | 69.106876  | 0.624333  |
| 55.616574   | 190.251726 | 2.652228  |
| 69.909425   | 1.841412   | 0.032267  |
| 76.692639   | 87.223881  | 1.676746  |
| 91.939283   | 69.434914  | 1.600137  |
| 102.864961  | 11.938167  | 0.307810  |
| 111.345710  | 27.717726  | 0.773587  |
| 124.333012  | 76.316859  | 2.378401  |
| 128.182403  | 43.461519  | 1.396405  |
| 153.094233  | 19.065838  | 0.731632  |
| 172.843324  | 48.722179  | 2.110850  |
| 179.294358  | 88.626317  | 3.982973  |
| 224.211412  | 18.478197  | 1.038473  |
| 228.978324  | 3.422594   | 0.196439  |
| 236.488565  | 5.320879   | 0.315407  |
| 243.147559  | 23.629290  | 1.440120  |
| 245.340410  | 160.638515 | 9.878633  |
| 260.191082  | 84.828018  | 5.532352  |
| 266.962597  | 6.185289   | 0.413893  |
| 298.123955  | 109.919383 | 8.213896  |
| 307.192788  | 132.896340 | 10.232980 |
| 322.620301  | 12.623637  | 1.020832  |
| 330.695020  | 15.758393  | 1.306224  |
| 343.547242  | 5.352024   | 0.460874  |
| 368.531678  | 45.164174  | 4.172026  |
| 371.319900  | 75.325391  | 7.010802  |
| 378.411652  | 190.250702 | 18.045497 |
| 385.162970  | 57.084427  | 5.511125  |
| 395.800947  | 65.133465  | 6.461883  |
| 415.219396  | 95.968225  | 9.988107  |
| 442.513443  | 12.824351  | 1.422460  |
| 451.990811  | 180.518171 | 20.451662 |
| 455.827934  | 34.186361  | 3.905997  |
| 512.817664  | 24.398436  | 3.136195  |
| 521.831795  | 110.451203 | 14.447046 |
| 552.205292  | 40.173494  | 5.560556  |
| 561.632473  | 80.531112  | 11.336891 |
| 563.201527  | 31.338176  | 4.424005  |
| 568.913063  | 9.573449   | 1.365188  |
| 571.616404  | 3.670279   | 0.525874  |
| 613.213602  | 22.258700  | 3.421288  |
| 645.176030  | 24.659733  | 3.987904  |
| 664.204307  | 11.319442  | 1.884537  |
| 686.877886  | 24.491024  | 4.216621  |
| 715.972704  | 35.856279  | 6.434870  |
| 730.830672  | 157.476279 | 28.847619 |
| 757.708388  | 205.861191 | 39.098009 |
| 794.138906  | 71.037235  | 14.140364 |
| 796.617168  | 229.140123 | 45.753980 |
| 806.432076  | 10.556511  | 2.133862  |
| 820.285652  | 1.568525   | 0.322504  |
| 820.961344  | 3.509611   | 0.722204  |
| 821.753069  | 60.714180  | 12.505744 |
| 825.029109  | 408.271683 | 84.429963 |
| 828.049993  | 78.530104  | 16.299369 |
| 831.522453  | 9.371571   | 1.953280  |
| 842.382611  | 109.294928 | 23.077431 |
| 845.200710  | 6.857241   | 1.452738  |
| 846.325088  | 15.327318  | 3.251483  |
| 855.922395  | 21.908288  | 4.700249  |
| 893.063856  | 8.249827   | 1.846739  |
| 895.590067  | 5.267058   | 1.182376  |
| 896.676011  | 6.032579   | 1.355866  |
| 897.833869  | 17.099975  | 3.848305  |
| 903.059575  | 11.341513  | 2.567234  |
| 913.991304  | 4.283795   | 0.981406  |
| 921.916502  | 3.474605   | 0.802925  |
| 929.063312  | 120.302394 | 28.015453 |
| 951.843438  | 0.069699   | 0.016629  |
| 972.001337  | 37.327389  | 9.094368  |
| 991.992149  | 29.193089  | 7.258825  |
| 993.115907  | 21.301086  | 5.302489  |
| 994.468283  | 13.331079  | 3.323030  |
| 995.664866  | 79.879662  | 19.935516 |
| 1009.126355 | 32.593851  | 8.244405  |
| 1028.387987 | 36.957001  | 9.526465  |
| 1033.620496 | 38.752963  | 10.040240 |
| 1045.072846 | 1.768198   | 0.463186  |
| 1048.299973 | 0.993102   | 0.260950  |
| 1049.976612 | 5.502762   | 1.448233  |
| 1052.766958 | 21.436976  | 5.656839  |
| 1053.107364 | 11.092030  | 2.927937  |
| 1079.362356 | 2.392129   | 0.647187  |
| 1087.510556 | 13.290197  | 3.622788  |
| 1096.969789 | 28.460673  | 7.825605  |
| 1106.571121 | 26.453373  | 7.337337  |
| 1109.134177 | 4.047809   | 1.125336  |
| 1123.301226 | 199.956601 | 56.300215 |
| 1138.686447 | 16.774279  | 4.787691  |
| 1163.119782 | 5.941936   | 1.732330  |
| 1182.432767 | 40.401894  | 11.974469 |
| 1200.889313 | 46.588714  | 14.023673 |
| 1236.842256 | 0.065450   | 0.020291  |
| 1237.756686 | 0.415804   | 0.129004  |
| 1261.296986 | 18.009937  | 5.693871  |
| 1271.806363 | 57.945635  | 18.472250 |
| 1280.103555 | 4.369578   | 1.402047  |

Supplementary Material (ESI) for Chemical Communications  
This journal is (c) The Royal Society of Chemistry 2011

|             |            |            |
|-------------|------------|------------|
| 1298.612219 | 29.740777  | 9.680769   |
| 1317.156222 | 11.484172  | 3.791535   |
| 1335.959970 | 5.701926   | 1.909383   |
| 1341.675632 | 2.658943   | 0.894200   |
| 1343.874617 | 1.861381   | 0.627007   |
| 1360.592949 | 11.747072  | 4.006230   |
| 1363.556077 | 3.225752   | 1.102509   |
| 1380.079917 | 134.579095 | 46.554312  |
| 1391.199012 | 25.094753  | 8.750850   |
| 1398.798106 | 8.634132   | 3.027274   |
| 1407.083289 | 17.890409  | 6.309837   |
| 1408.173432 | 23.367353  | 8.247907   |
| 1423.560885 | 12.741259  | 4.546388   |
| 1425.292011 | 19.674865  | 7.029002   |
| 1435.172196 | 46.028687  | 16.558106  |
| 1443.335329 | 44.215184  | 15.996197  |
| 1448.590052 | 96.406277  | 35.004903  |
| 1451.286586 | 34.394485  | 12.511808  |
| 1459.445997 | 104.318378 | 38.161631  |
| 1470.822265 | 52.111144  | 19.211836  |
| 1478.211805 | 50.560250  | 18.733717  |
| 1491.759465 | 287.261991 | 107.412553 |
| 1554.835686 | 6.058860   | 2.361312   |
| 1595.944405 | 34.302770  | 13.722240  |
| 2880.758810 | 50.912799  | 36.763084  |
| 2885.915556 | 80.171361  | 57.993717  |
| 3011.281905 | 22.389830  | 16.899750  |
| 3016.072697 | 20.991669  | 15.869631  |
| 3059.810646 | 8.092760   | 6.206822   |
| 3074.105752 | 13.461000  | 10.372280  |
| 3114.065947 | 1.083267   | 0.845554   |
| 3121.313685 | 2.156983   | 1.687572   |
| 3133.569399 | 1.381876   | 1.085392   |
| 3135.683746 | 0.307690   | 0.241838   |
| 3147.224382 | 2.117140   | 1.670149   |
| 3153.804674 | 4.358028   | 3.445108   |
| 3160.017002 | 0.087541   | 0.069339   |
| 3166.683963 | 0.225449   | 0.178949   |
| 3168.516112 | 0.692479   | 0.549972   |
| 3172.050906 | 0.884746   | 0.703456   |
| 3175.885241 | 0.683323   | 0.543963   |
| 3176.353978 | 2.107079   | 1.677598   |
| 3176.748016 | 2.096000   | 1.668984   |
| 3182.173397 | 4.794639   | 3.824351   |
| 3189.135738 | 3.492440   | 2.791773   |
| 3189.387547 | 1.247282   | 0.997126   |
| 3198.643657 | 1.456190   | 1.167514   |

| Temp   |                                             | Transl | Rotat  | Vibrat  | Total   |
|--------|---------------------------------------------|--------|--------|---------|---------|
| ----   |                                             | -----  | -----  | -----   | -----   |
| 298.15 | Entropy (cal/mole-K):                       | 45.330 | 36.081 | 81.370  | 162.780 |
|        | Internal Energy (Kcal/mole):                | 0.889  | 0.889  | 259.883 | 261.661 |
|        | Constant Volume Heat Capacity (cal/mole-K): | 2.981  | 2.981  | 93.665  | 99.626  |

\*\*\*\*\*

### III

Geometry CYCLE 20

=====

Energy gradients wrt nuclear displacements

=====

| Atom  | Cartesian (a.u./angstrom) |           |           |
|-------|---------------------------|-----------|-----------|
|       | X                         | Y         | Z         |
| ----- |                           |           |           |
| 1 C   | 0.000082                  | 0.000216  | 0.000020  |
| 2 H   | -0.000039                 | 0.000031  | -0.000030 |
| 3 C   | 0.000104                  | -0.000091 | -0.000083 |
| 4 H   | 0.000002                  | -0.000036 | 0.000008  |
| 5 C   | 0.000014                  | 0.000019  | 0.000008  |
| 6 H   | 0.000013                  | -0.000063 | 0.000009  |
| 7 C   | -0.000087                 | -0.000134 | -0.000075 |
| 8 H   | 0.000005                  | -0.000037 | -0.000003 |
| 9 C   | 0.000021                  | -0.000011 | 0.000084  |
| 10 C  | -0.000383                 | 0.000027  | -0.000843 |
| 11 C  | 0.000214                  | -0.000191 | -0.000008 |
| 12 C  | 0.000482                  | -0.000153 | 0.000122  |
| 13 H  | -0.000030                 | 0.000030  | 0.000011  |
| 14 C  | -0.000430                 | -0.000077 | -0.000109 |
| 15 N  | -0.000067                 | 0.000085  | 0.000030  |
| 16 C  | 0.000210                  | 0.000250  | 0.000036  |
| 17 H  | 0.000036                  | -0.000032 | -0.000022 |
| 18 C  | 0.000399                  | 0.000482  | 0.000191  |
| 19 H  | -0.000016                 | -0.000028 | -0.000023 |
| 20 Cl | 0.000086                  | -0.000074 | 0.000293  |
| 21 C  | 0.000146                  | 0.000075  | -0.000063 |
| 22 C  | -0.000117                 | -0.000032 | -0.000136 |
| 23 C  | -0.000104                 | -0.000037 | 0.000032  |
| 24 C  | 0.000036                  | -0.000063 | -0.000064 |
| 25 C  | 0.000121                  | 0.000002  | -0.000024 |
| 26 H  | 0.000012                  | -0.000020 | 0.000093  |
| 27 H  | 0.000008                  | -0.000065 | 0.000036  |
| 28 H  | -0.000018                 | -0.000004 | 0.000009  |
| 29 H  | -0.000064                 | -0.000028 | -0.000008 |
| 30 H  | 0.000023                  | -0.000059 | 0.000008  |
| 31 N  | 0.000010                  | -0.000273 | 0.000097  |
| 32 Ir | -0.000430                 | 0.000390  | -0.000099 |
| 33 C  | -0.000005                 | -0.000088 | -0.000006 |
| 34 H  | -0.000007                 | 0.000003  | 0.000013  |
| 35 H  | 0.000001                  | -0.000016 | 0.000015  |
| 36 H  | -0.000062                 | 0.000035  | 0.000005  |
| 37 C  | -0.000043                 | -0.000090 | 0.000008  |
| 38 H  | 0.000010                  | 0.000033  | 0.000006  |
| 39 H  | 0.000043                  | 0.000041  | -0.000018 |
| 40 H  | 0.000009                  | 0.000026  | 0.000000  |
| 41 Ir | -0.000651                 | 0.000111  | 0.000672  |
| 42 C  | 0.000292                  | -0.000224 | 0.000113  |
| 43 C  | 0.000031                  | 0.000042  | 0.000058  |
| 44 C  | 0.000031                  | 0.000018  | -0.000186 |
| 45 C  | -0.000039                 | 0.000032  | -0.000021 |
| 46 C  | 0.000232                  | 0.000144  | -0.000017 |
| 47 H  | -0.000016                 | -0.000045 | -0.000042 |
| 48 H  | 0.000008                  | -0.000056 | -0.000061 |
| 49 H  | -0.000021                 | -0.000015 | -0.000027 |
| 50 H  | -0.000038                 | -0.000024 | -0.000012 |
| 51 H  | -0.000014                 | -0.000023 | 0.000007  |
| ----- |                           |           |           |

-----  
Geometry Convergence after Step 20

-----

|                          |                      |            |   |
|--------------------------|----------------------|------------|---|
| current energy           | -11.11602195 Hartree |            |   |
| abs of energy change     | 0.00000291           | 0.00100000 | T |
| constrained gradient max | 0.00084345           | 0.00100000 | T |
| constrained gradient rms | 0.00016076           | 0.00066667 | T |
| gradient max             | 0.00084345           |            |   |
| gradient rms             | 0.00016076           |            |   |
| cart. step max           | 0.00542116           | 0.01000000 | T |
| cart. step rms           | 0.00152811           | 0.00666667 | T |

Summary of Bonding Energy (energy terms are taken from the energy decomposition above)

|                                 |                     |           |          |           |
|---------------------------------|---------------------|-----------|----------|-----------|
| =====                           |                     |           |          |           |
| Electrostatic Energy:           | -10.881796876753072 | -296.1088 | -6828.43 | -28570.15 |
| Kinetic Energy:                 | 13.398480784897288  | 364.5912  | 8407.67  | 35177.71  |
| Coulomb (Steric+OrbInt) Energy: | -3.123682559614579  | -84.9997  | -1960.14 | -8201.23  |
| XC Energy:                      | -10.509025772584714 | -285.9651 | -6594.51 | -27591.44 |
| -----                           |                     |           |          |           |
| Total Bonding Energy:           | -11.116024424055077 | -302.4824 | -6975.41 | -29185.12 |
| List of All Frequencies:        |                     |           |          |           |

Intensities

=====

| Frequency<br>cm-1 | Dipole Strength<br>1e-40 esu2 cm2 | Absorption Intensity (degeneracy not counted)<br>km/mole |
|-------------------|-----------------------------------|----------------------------------------------------------|
| -----             |                                   |                                                          |
| 12.849866         | 0.000000                          | 0.000000                                                 |
| 26.246493         | 247.893084                        | 1.630849                                                 |
| 38.844212         | 75.337488                         | 0.733526                                                 |

Supplementary Material (ESI) for Chemical Communications  
This journal is (c) The Royal Society of Chemistry 2011

|             |            |           |
|-------------|------------|-----------|
| 48.885114   | 156.264263 | 1.914760  |
| 58.063166   | 148.613343 | 2.162901  |
| 63.949464   | 45.051146  | 0.722139  |
| 66.244464   | 39.794994  | 0.660779  |
| 80.770905   | 47.542758  | 0.962537  |
| 98.829152   | 50.198384  | 1.243520  |
| 105.803894  | 50.283808  | 1.333546  |
| 118.734299  | 140.620986 | 4.185086  |
| 120.520544  | 31.801380  | 0.960694  |
| 126.887491  | 53.464002  | 1.700428  |
| 141.494846  | 365.144099 | 12.950394 |
| 155.394324  | 113.851138 | 4.434561  |
| 202.255264  | 120.430374 | 6.105397  |
| 219.074869  | 203.283912 | 11.162813 |
| 249.802828  | 46.286628  | 2.898217  |
| 254.177560  | 149.555724 | 9.528363  |
| 263.499362  | 231.777203 | 15.308349 |
| 275.919979  | 8.406106   | 0.581375  |
| 287.107092  | 10.847694  | 0.780655  |
| 311.693842  | 141.612619 | 11.063900 |
| 327.422338  | 188.771660 | 15.492559 |
| 333.143277  | 31.613648  | 2.639877  |
| 337.561081  | 76.718082  | 6.491248  |
| 342.402190  | 75.815955  | 6.506916  |
| 351.006639  | 47.843779  | 4.209387  |
| 367.701800  | 21.933431  | 2.021531  |
| 369.761687  | 44.216366  | 4.098105  |
| 380.447106  | 111.642280 | 10.646358 |
| 433.373713  | 35.293532  | 3.833856  |
| 440.906455  | 32.773217  | 3.621960  |
| 465.391108  | 42.350045  | 4.940262  |
| 483.928454  | 59.124735  | 7.171804  |
| 508.293285  | 172.436884 | 21.969623 |
| 528.378527  | 42.052943  | 5.569544  |
| 545.443062  | 5.839300   | 0.798341  |
| 550.038007  | 3.798567   | 0.523710  |
| 552.457815  | 41.693633  | 5.773603  |
| 557.682163  | 33.289957  | 4.653482  |
| 560.154956  | 43.424160  | 6.097021  |
| 597.118920  | 131.904067 | 19.742270 |
| 628.416518  | 156.172383 | 24.599705 |
| 649.499131  | 110.858874 | 18.047918 |
| 660.438791  | 13.054337  | 2.161053  |
| 715.242603  | 20.248007  | 3.630059  |
| 728.878331  | 115.650446 | 21.129072 |
| 759.404457  | 246.086802 | 46.842443 |
| 787.412853  | 19.043620  | 3.758634  |
| 809.564991  | 72.571261  | 14.726328 |
| 815.893391  | 11.313753  | 2.313759  |
| 817.924623  | 4.464094   | 0.915218  |
| 818.582068  | 25.459080  | 5.223757  |
| 830.508169  | 109.584031 | 22.812309 |
| 838.676655  | 181.205234 | 38.092841 |
| 840.301452  | 67.899405  | 14.301420 |
| 846.710272  | 273.909967 | 58.132732 |
| 852.783654  | 40.055929  | 8.562168  |
| 855.272329  | 15.126973  | 3.242907  |
| 857.367557  | 34.187217  | 7.346980  |
| 867.751969  | 32.500192  | 7.069026  |
| 894.852401  | 34.531062  | 7.745321  |
| 902.466662  | 10.212893  | 2.310245  |
| 906.952832  | 3.758688   | 0.854474  |
| 908.464275  | 8.051886   | 1.833511  |
| 914.317884  | 8.459200   | 1.938673  |
| 919.628792  | 5.918040   | 1.364170  |
| 928.513104  | 45.632900  | 10.620481 |
| 929.778560  | 6.384273   | 1.487884  |
| 959.757904  | 0.157086   | 0.037790  |
| 976.337203  | 31.550300  | 7.721140  |
| 989.522239  | 21.237453  | 5.267518  |
| 992.327428  | 6.130832   | 1.524939  |
| 994.129093  | 120.982616 | 30.146981 |
| 997.346341  | 47.800089  | 11.949584 |
| 1010.301119 | 27.986744  | 7.087307  |
| 1034.983330 | 49.513637  | 12.845063 |
| 1037.089162 | 95.261291  | 24.763420 |
| 1048.728736 | 1.007818   | 0.264925  |
| 1053.391845 | 10.661173  | 2.814965  |
| 1054.321376 | 2.507285   | 0.662605  |
| 1054.970433 | 18.677667  | 4.939022  |
| 1055.140900 | 7.905276   | 2.090767  |
| 1075.373523 | 2.169117   | 0.584683  |
| 1098.817472 | 5.251970   | 1.446525  |
| 1100.125783 | 13.085817  | 3.608455  |
| 1100.856712 | 5.966216   | 1.646296  |
| 1116.607314 | 31.553095  | 8.831216  |
| 1120.264968 | 66.471369  | 18.665234 |
| 1162.630460 | 58.164791  | 16.950400 |
| 1170.793695 | 2.219330   | 0.651299  |
| 1191.236785 | 17.629802  | 5.264094  |
| 1198.626579 | 123.767950 | 37.185204 |
| 1238.716056 | 0.160942   | 0.049971  |
| 1239.372692 | 0.158336   | 0.049188  |
| 1270.869621 | 25.800834  | 8.218883  |
| 1280.644866 | 34.185097  | 10.973460 |
| 1303.316034 | 13.495638  | 4.408808  |
| 1315.327615 | 1.754405   | 0.578418  |
| 1333.967007 | 5.877504   | 1.965242  |
| 1338.946163 | 55.793280  | 18.725054 |

Supplementary Material (ESI) for Chemical Communications  
This journal is (c) The Royal Society of Chemistry 2011

|             |             |            |
|-------------|-------------|------------|
| 1342.233126 | 3.528365    | 1.187079   |
| 1345.204963 | 3.660286    | 1.234189   |
| 1346.731949 | 6.361466    | 2.147417   |
| 1351.379766 | 4.563532    | 1.545812   |
| 1391.689979 | 47.509249   | 16.572909  |
| 1394.365918 | 38.770450   | 13.550511  |
| 1401.232364 | 41.982817   | 14.745510  |
| 1403.645241 | 61.016299   | 21.467491  |
| 1407.557211 | 26.998912   | 9.525557   |
| 1426.773668 | 20.265322   | 7.247474   |
| 1428.562680 | 155.404595  | 55.646932  |
| 1440.249185 | 18.378921   | 6.634920   |
| 1448.928677 | 28.211532   | 10.245939  |
| 1451.080909 | 15.812903   | 5.751502   |
| 1456.117600 | 29.998689   | 10.949059  |
| 1469.434072 | 108.426535  | 39.935926  |
| 1473.115308 | 38.521553   | 14.223897  |
| 1484.952039 | 31.973056   | 11.900758  |
| 1557.064538 | 0.678224    | 0.264703   |
| 1586.963543 | 1134.900752 | 451.442980 |
| 1593.205465 | 19.605415   | 7.829354   |
| 2976.589683 | 10.173026   | 7.590095   |
| 2979.108503 | 6.775914    | 5.059788   |
| 3069.352445 | 0.731887    | 0.563078   |
| 3075.940829 | 0.774747    | 0.597332   |
| 3106.165634 | 1.465239    | 1.140804   |
| 3111.539969 | 1.917138    | 1.495226   |
| 3136.648669 | 1.807080    | 1.420762   |
| 3140.834129 | 1.352308    | 1.064630   |
| 3147.255615 | 5.096571    | 4.020575   |
| 3150.234343 | 0.819480    | 0.647082   |
| 3154.984864 | 22.326078   | 17.655816  |
| 3158.849467 | 6.440375    | 5.099389   |
| 3170.126853 | 0.914685    | 0.726819   |
| 3171.044902 | 2.503555    | 1.989929   |
| 3172.660345 | 2.842930    | 2.260830   |
| 3178.534021 | 2.378520    | 1.895011   |
| 3179.870849 | 3.168224    | 2.525244   |
| 3183.742790 | 14.236644   | 11.361186  |
| 3185.898106 | 23.802131   | 19.007534  |
| 3187.698851 | 20.393914   | 16.295059  |
| 3188.904349 | 11.840237   | 9.464114   |
| 3198.653739 | 4.857750    | 3.894758   |
| 3198.778408 | 4.549096    | 3.647433   |

| Temp   |                                             | Transl | Rotat  | Vibrat  | Total   |
|--------|---------------------------------------------|--------|--------|---------|---------|
| ----   |                                             | -----  | -----  | -----   | -----   |
| 298.15 | Entropy (cal/mole-K):                       | 45.716 | 36.321 | 92.745  | 174.783 |
|        | Internal Energy (Kcal/mole):                | 0.889  | 0.889  | 261.602 | 263.379 |
|        | Constant Volume Heat Capacity (cal/mole-K): | 2.981  | 2.981  | 95.914  | 101.876 |

\*\*\*\*\*

# TS1-III

Geometry CYCLE 41

Energy gradients wrt nuclear displacements

| Atom  | Cartesian (a.u./angstrom) |           |           |
|-------|---------------------------|-----------|-----------|
|       | X                         | Y         | Z         |
| 1 C   | 0.000067                  | 0.000015  | 0.000134  |
| 2 H   | 0.000026                  | -0.000060 | -0.000011 |
| 3 C   | 0.000007                  | 0.000055  | 0.000009  |
| 4 H   | -0.000009                 | -0.000042 | 0.000042  |
| 5 C   | 0.000095                  | -0.000013 | 0.000076  |
| 6 H   | 0.000031                  | 0.000028  | 0.000038  |
| 7 C   | 0.000088                  | 0.000037  | 0.000084  |
| 8 H   | 0.000001                  | 0.000001  | 0.000040  |
| 9 C   | -0.000200                 | -0.000071 | -0.000037 |
| 10 C  | 0.000296                  | -0.000049 | -0.000295 |
| 11 C  | -0.000190                 | -0.000089 | 0.000234  |
| 12 C  | 0.000143                  | -0.000168 | 0.000315  |
| 13 H  | 0.000041                  | 0.000064  | 0.000030  |
| 14 C  | 0.000150                  | -0.000209 | 0.000189  |
| 15 N  | 0.000071                  | 0.000153  | -0.000080 |
| 16 C  | -0.000037                 | 0.000216  | 0.000035  |
| 17 H  | 0.000039                  | -0.000018 | 0.000037  |
| 18 C  | -0.000006                 | -0.000232 | -0.000162 |
| 19 H  | -0.000036                 | 0.000015  | -0.000009 |
| 20 Cl | 0.000070                  | 0.000024  | 0.000204  |
| 21 C  | 0.000098                  | -0.000026 | -0.000070 |
| 22 C  | -0.000003                 | -0.000139 | 0.000039  |
| 23 C  | 0.000106                  | 0.000053  | 0.000146  |
| 24 C  | 0.000036                  | -0.000019 | 0.000066  |
| 25 C  | -0.000068                 | 0.000130  | 0.000060  |
| 26 H  | -0.000015                 | 0.000019  | -0.000008 |
| 27 H  | -0.000009                 | -0.000003 | 0.000046  |
| 28 H  | -0.000011                 | -0.000014 | 0.000033  |
| 29 H  | -0.000013                 | 0.000004  | -0.000013 |
| 30 H  | -0.000002                 | 0.000015  | 0.000014  |
| 31 N  | -0.000067                 | 0.000039  | -0.000007 |
| 32 Ir | -0.000242                 | -0.000066 | -0.000398 |
| 33 C  | 0.000023                  | -0.000043 | -0.000094 |
| 34 H  | 0.000050                  | 0.000030  | 0.000049  |
| 35 H  | -0.000049                 | 0.000076  | 0.000060  |
| 36 H  | -0.000016                 | -0.000016 | 0.000053  |
| 37 C  | -0.000023                 | 0.000011  | 0.000132  |
| 38 H  | -0.000001                 | 0.000000  | 0.000007  |
| 39 H  | -0.000039                 | -0.000021 | 0.000028  |
| 40 H  | 0.000021                  | -0.000008 | -0.000039 |
| 41 Ir | -0.000763                 | 0.000383  | -0.000914 |
| 42 C  | 0.000028                  | -0.000109 | 0.000142  |
| 43 C  | 0.000072                  | 0.000050  | -0.000117 |
| 44 C  | -0.000061                 | -0.000117 | -0.000116 |
| 45 C  | 0.000185                  | -0.000076 | -0.000110 |
| 46 C  | 0.000073                  | 0.000107  | 0.000070  |
| 47 H  | -0.000001                 | 0.000031  | 0.000046  |
| 48 H  | 0.000028                  | -0.000008 | 0.000028  |
| 49 H  | 0.000045                  | 0.000022  | 0.000001  |
| 50 H  | -0.000024                 | 0.000022  | 0.000007  |
| 51 H  | -0.000005                 | 0.000015  | -0.000013 |

Geometry Convergence after Step 41

|                          |                      |            |   |
|--------------------------|----------------------|------------|---|
| current energy           | -11.08199539 Hartree |            |   |
| abs of energy change     | 0.00000445           | 0.00100000 | T |
| constrained gradient max | 0.00091388           | 0.00100000 | T |
| constrained gradient rms | 0.00013971           | 0.00066667 | T |
| gradient max             | 0.00091388           |            |   |
| gradient rms             | 0.00013971           |            |   |
| cart. step max           | 0.00904993           | 0.01000000 | T |
| cart. step rms           | 0.00321292           | 0.00666667 | T |

Summary of Bonding Energy (energy terms are taken from the energy decomposition above)

|                                 |                     |           |          |           |
|---------------------------------|---------------------|-----------|----------|-----------|
| Electrostatic Energy:           | -10.847965368341191 | -295.1882 | -6807.20 | -28481.33 |
| Kinetic Energy:                 | 13.394723884680545  | 364.4890  | 8405.32  | 35167.84  |
| Coulomb (Steric+OrbInt) Energy: | -3.143309433586680  | -85.5338  | -1972.46 | -8252.76  |
| XC Energy:                      | -10.485447688567479 | -285.3235 | -6579.72 | -27529.54 |
| Total Bonding Energy:           | -11.081998605814805 | -301.5565 | -6954.06 | -29095.78 |

List of All Frequencies:

Intensities

| Frequency<br>cm-1 | Dipole Strength<br>1e-40 esu2 cm2 | Absorption Intensity (degeneracy not counted)<br>km/mole |
|-------------------|-----------------------------------|----------------------------------------------------------|
| -109.536423       | 61.646998                         | -1.692577                                                |

|             |            |           |
|-------------|------------|-----------|
| 20.121521   | 72.556664  | 0.365945  |
| 35.030705   | 48.236008  | 0.423544  |
| 56.078954   | 246.731056 | 3.468181  |
| 62.607251   | 15.233583  | 0.239059  |
| 74.109541   | 132.749037 | 2.465946  |
| 92.103890   | 19.886623  | 0.459110  |
| 95.478823   | 19.473713  | 0.466051  |
| 108.225872  | 51.742141  | 1.403633  |
| 117.699161  | 170.069377 | 5.017386  |
| 124.099894  | 36.467691  | 1.134378  |
| 141.116988  | 166.640689 | 5.894384  |
| 152.927797  | 189.665818 | 7.270321  |
| 186.169283  | 8.895949   | 0.415124  |
| 195.811957  | 47.455249  | 2.329172  |
| 201.530023  | 12.882978  | 0.650780  |
| 216.647831  | 60.421472  | 3.281132  |
| 220.872234  | 104.634417 | 5.792870  |
| 231.358668  | 133.539934 | 7.744172  |
| 257.356307  | 61.772174  | 3.984793  |
| 270.055125  | 120.167452 | 8.134247  |
| 281.860289  | 20.448056  | 1.444654  |
| 310.364120  | 163.923136 | 12.752338 |
| 317.985938  | 85.699191  | 6.830661  |
| 327.196677  | 54.954582  | 4.507034  |
| 339.571840  | 61.821907  | 5.262016  |
| 343.567584  | 58.673907  | 5.052837  |
| 348.638979  | 175.644710 | 15.349318 |
| 361.968320  | 45.564916  | 4.134083  |
| 365.424740  | 175.546829 | 16.079369 |
| 383.576660  | 46.674478  | 4.487554  |
| 397.846356  | 54.860865  | 5.470866  |
| 435.213645  | 56.966551  | 6.214418  |
| 438.043502  | 27.722898  | 3.043925  |
| 456.586733  | 129.841701 | 14.859889 |
| 508.222242  | 101.786359 | 12.966457 |
| 518.411563  | 96.720864  | 12.568195 |
| 542.195274  | 0.227135   | 0.030869  |
| 546.159606  | 7.410413   | 1.014472  |
| 551.420912  | 30.755442  | 4.250923  |
| 556.681953  | 65.366091  | 9.120901  |
| 559.947842  | 21.877533  | 3.070605  |
| 609.217184  | 63.227241  | 9.655048  |
| 642.694973  | 12.256939  | 1.974536  |
| 660.764617  | 6.086911   | 1.008142  |
| 681.110961  | 42.841636  | 7.314118  |
| 715.823765  | 27.102468  | 4.862874  |
| 729.081319  | 120.308380 | 21.986187 |
| 761.566275  | 218.326458 | 41.676587 |
| 792.043759  | 17.213514  | 3.417408  |
| 811.268930  | 49.575533  | 10.081155 |
| 816.863733  | 7.059015   | 1.445346  |
| 817.494606  | 6.226218   | 1.275814  |
| 819.783871  | 19.248324  | 3.955217  |
| 833.468845  | 174.210969 | 36.395102 |
| 846.307712  | 106.374612 | 22.565469 |
| 851.817555  | 102.863303 | 21.962669 |
| 854.989846  | 193.272545 | 41.419914 |
| 857.976010  | 99.314580  | 21.358278 |
| 860.965966  | 44.899904  | 9.689681  |
| 874.069526  | 38.746488  | 8.488997  |
| 878.921698  | 30.719192  | 6.767652  |
| 909.261018  | 97.940127  | 22.321702 |
| 913.010173  | 104.707427 | 23.962447 |
| 916.844389  | 16.438128  | 3.777688  |
| 917.538321  | 9.080317   | 2.088350  |
| 920.309300  | 28.482451  | 6.570361  |
| 928.624616  | 7.758913   | 1.806006  |
| 933.235609  | 0.261639   | 0.061203  |
| 934.574410  | 54.549510  | 12.778586 |
| 961.026939  | 0.168400   | 0.040565  |
| 974.943008  | 28.990272  | 7.084506  |
| 989.326741  | 20.589573  | 5.105816  |
| 993.066872  | 7.488119   | 1.863929  |
| 994.433430  | 75.831713  | 18.901865 |
| 998.941299  | 37.609112  | 9.416968  |
| 1006.050796 | 40.875663  | 10.307724 |
| 1020.717332 | 56.091374  | 14.350916 |
| 1029.528209 | 71.172951  | 18.366707 |
| 1049.951085 | 1.463159   | 0.385069  |
| 1052.889663 | 1.299011   | 0.342826  |
| 1053.275940 | 2.126932   | 0.561531  |
| 1054.079384 | 2.940612   | 0.776943  |
| 1056.053999 | 29.209352  | 7.731898  |
| 1071.251761 | 7.990542   | 2.145586  |
| 1095.093860 | 20.521915  | 5.633098  |
| 1099.367426 | 3.412609   | 0.940389  |
| 1100.771635 | 6.056669   | 1.671126  |
| 1112.946573 | 25.278622  | 7.051894  |
| 1116.321219 | 284.435771 | 79.588710 |
| 1133.520496 | 19.664650  | 5.587193  |
| 1160.731657 | 28.668273  | 8.340872  |
| 1171.731629 | 1.689028   | 0.496070  |
| 1192.471431 | 68.475548  | 20.467348 |
| 1238.823308 | 0.433247   | 0.134531  |
| 1239.312958 | 0.097036   | 0.030143  |
| 1258.715593 | 43.560413  | 13.743510 |
| 1267.363949 | 69.668656  | 22.131806 |
| 1277.028869 | 16.598687  | 5.313155  |
| 1303.644934 | 27.045697  | 8.837625  |

Supplementary Material (ESI) for Chemical Communications  
This journal is (c) The Royal Society of Chemistry 2011

|             |            |           |
|-------------|------------|-----------|
| 1307.137409 | 23.753891  | 7.782768  |
| 1312.843468 | 36.106757  | 11.881725 |
| 1342.623808 | 12.042024  | 4.052583  |
| 1346.188486 | 2.580708   | 0.870809  |
| 1346.974218 | 41.369561  | 13.967487 |
| 1349.707460 | 4.200323   | 1.421021  |
| 1366.535257 | 152.186597 | 52.128511 |
| 1393.943007 | 38.042111  | 13.291919 |
| 1399.405824 | 39.262588  | 13.772116 |
| 1401.699637 | 21.689597  | 7.620518  |
| 1405.466768 | 67.253098  | 23.692503 |
| 1424.920235 | 49.066802  | 17.524933 |
| 1430.257600 | 35.850528  | 12.852508 |
| 1437.288543 | 133.299809 | 48.023251 |
| 1440.157193 | 14.022657  | 5.061955  |
| 1445.988154 | 46.426845  | 16.827205 |
| 1450.911235 | 50.519796  | 18.373018 |
| 1457.162216 | 188.516788 | 68.855083 |
| 1461.099127 | 6.153880   | 2.253755  |
| 1474.866947 | 78.594555  | 29.055167 |
| 1484.287308 | 173.049772 | 64.382387 |
| 1556.590050 | 8.265270   | 3.224849  |
| 1590.504684 | 27.861589  | 11.107566 |
| 2902.412061 | 44.361287  | 32.273144 |
| 2918.047663 | 40.150652  | 29.367235 |
| 3031.207910 | 5.513543   | 4.189137  |
| 3038.647603 | 7.487187   | 5.702655  |
| 3074.832238 | 0.696576   | 0.536869  |
| 3085.079564 | 9.146450   | 7.072892  |
| 3129.652405 | 1.692001   | 1.327318  |
| 3136.681773 | 6.749017   | 5.306266  |
| 3137.646914 | 2.468230   | 1.941188  |
| 3141.469017 | 1.626270   | 1.280571  |
| 3146.508992 | 9.317294   | 7.348469  |
| 3154.255406 | 24.903184  | 19.689278 |
| 3170.393532 | 0.643652   | 0.511496  |
| 3171.610669 | 2.471059   | 1.964450  |
| 3172.024151 | 2.564924   | 2.039337  |
| 3176.232026 | 3.170508   | 2.524173  |
| 3179.095730 | 3.699922   | 2.948318  |
| 3183.068443 | 17.634476  | 14.069757 |
| 3184.348827 | 34.304469  | 27.381007 |
| 3185.483817 | 19.298573  | 15.409150 |
| 3187.892114 | 17.070107  | 13.640112 |
| 3196.805901 | 4.930718   | 3.950977  |
| 3197.752004 | 7.562543   | 6.061648  |

| Temp   |                                             | Transl | Rotat  | Vibrat  | Total   |
|--------|---------------------------------------------|--------|--------|---------|---------|
| ----   |                                             | -----  | -----  | -----   | -----   |
| 298.15 | Entropy (cal/mole-K):                       | 45.716 | 36.317 | 90.560  | 172.594 |
|        | Internal Energy (Kcal/mole):                | 0.889  | 0.889  | 260.721 | 262.498 |
|        | Constant Volume Heat Capacity (cal/mole-K): | 2.981  | 2.981  | 95.990  | 101.952 |

\*\*\*\*\*

## TS2-III

Geometry CYCLE 16

Energy gradients wrt nuclear displacements

| Atom  | Cartesian (a.u./angstrom) |           |           |
|-------|---------------------------|-----------|-----------|
|       | X                         | Y         | Z         |
| 1 C   | 0.000039                  | -0.000012 | 0.000001  |
| 2 H   | -0.000018                 | -0.000006 | -0.000033 |
| 3 C   | 0.000084                  | 0.000051  | 0.000126  |
| 4 H   | -0.000027                 | -0.000003 | -0.000036 |
| 5 C   | -0.000093                 | -0.000046 | -0.000116 |
| 6 H   | 0.000007                  | 0.000018  | 0.000011  |
| 7 C   | 0.000063                  | 0.000004  | 0.000050  |
| 8 H   | -0.000008                 | 0.000016  | 0.000012  |
| 9 C   | -0.000020                 | -0.000041 | -0.000050 |
| 10 C  | 0.000026                  | -0.000098 | 0.000034  |
| 11 C  | -0.000090                 | 0.000256  | -0.000381 |
| 12 C  | 0.000669                  | -0.000094 | -0.000003 |
| 13 H  | -0.000095                 | -0.000003 | 0.000030  |
| 14 C  | 0.000167                  | -0.000595 | 0.000317  |
| 15 N  | -0.000041                 | 0.000124  | 0.000131  |
| 16 C  | -0.000344                 | 0.000286  | 0.000030  |
| 17 H  | 0.000073                  | -0.000107 | -0.000006 |
| 18 C  | 0.000246                  | 0.000295  | -0.000059 |
| 19 H  | -0.000040                 | -0.000021 | 0.000035  |
| 20 Cl | -0.000059                 | -0.000028 | 0.000000  |
| 21 C  | 0.000026                  | 0.000026  | -0.000022 |
| 22 C  | -0.000043                 | -0.000014 | -0.000008 |
| 23 C  | -0.000044                 | 0.000010  | -0.000046 |
| 24 C  | 0.000008                  | 0.000004  | -0.000017 |
| 25 C  | -0.000007                 | -0.000004 | -0.000048 |
| 26 H  | -0.000003                 | 0.000004  | -0.000008 |
| 27 H  | -0.000005                 | -0.000001 | -0.000005 |
| 28 H  | 0.000011                  | 0.000011  | 0.000012  |
| 29 H  | -0.000008                 | -0.000009 | -0.000010 |
| 30 H  | 0.000003                  | -0.000004 | -0.000005 |
| 31 N  | -0.000105                 | -0.000056 | 0.000016  |
| 32 Ir | 0.000239                  | 0.000048  | 0.000159  |
| 33 C  | 0.000014                  | -0.000078 | -0.000078 |
| 34 H  | -0.000001                 | 0.000029  | 0.000014  |
| 35 H  | 0.000009                  | -0.000011 | -0.000013 |
| 36 H  | 0.000000                  | 0.000009  | -0.000018 |
| 37 C  | -0.000015                 | 0.000069  | -0.000030 |
| 38 H  | 0.000006                  | 0.000009  | 0.000001  |
| 39 H  | 0.000026                  | -0.000025 | 0.000037  |
| 40 H  | 0.000010                  | -0.000027 | 0.000019  |
| 41 Ir | -0.000916                 | -0.000181 | -0.000401 |
| 42 C  | 0.000152                  | -0.000036 | 0.000073  |
| 43 C  | 0.000045                  | 0.000025  | 0.000122  |
| 44 C  | 0.000040                  | 0.000140  | 0.000078  |
| 45 C  | 0.000060                  | 0.000103  | -0.000026 |
| 46 C  | -0.000011                 | -0.000012 | 0.000052  |
| 47 H  | -0.000002                 | -0.000006 | -0.000006 |
| 48 H  | 0.000021                  | -0.000005 | 0.000004  |
| 49 H  | -0.000005                 | -0.000035 | 0.000030  |
| 50 H  | -0.000036                 | 0.000035  | 0.000019  |
| 51 H  | -0.000006                 | -0.000017 | 0.000011  |

Geometry Convergence after Step 16

|                          |                      |            |   |
|--------------------------|----------------------|------------|---|
| current energy           | -11.08201986 Hartree |            |   |
| energy change            | -0.00000262          | 0.00100000 | T |
| constrained gradient max | 0.00091559           | 0.00100000 | T |
| constrained gradient rms | 0.00013819           | 0.00066667 | T |
| gradient max             | 0.00091559           |            |   |
| gradient rms             | 0.00013819           |            |   |
| cart. step max           | 0.00276863           | 0.01000000 | T |
| cart. step rms           | 0.00050927           | 0.00666667 | T |

Summary of Bonding Energy (energy terms are taken from the energy decomposition above)

|                                 |                     |           |          |           |
|---------------------------------|---------------------|-----------|----------|-----------|
| Electrostatic Energy:           | -10.852099643989787 | -295.3007 | -6809.80 | -28492.18 |
| Kinetic Energy:                 | 13.381819517948202  | 364.1378  | 8397.22  | 35133.96  |
| Coulomb (Steric+OrbInt) Energy: | -3.127108870052638  | -85.0930  | -1962.29 | -8210.22  |
| XC Energy:                      | -10.484631057469914 | -285.3013 | -6579.21 | -27527.39 |
| Total Bonding Energy:           | -11.082020053564136 | -301.5571 | -6954.07 | -29095.84 |

List of All Frequencies:

Intensities

| Frequency<br>cm-1 | Dipole Strength<br>1e-40 esu2 cm2 | Absorption Intensity (degeneracy not counted)<br>km/mole |
|-------------------|-----------------------------------|----------------------------------------------------------|
| -100.783642       | 27.367006                         | -0.691346                                                |
| 26.563634         | 91.278530                         | 0.607763                                                 |

Supplementary Material (ESI) for Chemical Communications  
This journal is (c) The Royal Society of Chemistry 2011

|             |            |           |
|-------------|------------|-----------|
| 38.239149   | 41.220668  | 0.395095  |
| 57.245967   | 210.923394 | 3.026549  |
| 62.449388   | 24.122456  | 0.377596  |
| 73.265571   | 74.532358  | 1.368746  |
| 88.202539   | 70.572577  | 1.560253  |
| 96.329107   | 16.315071  | 0.393935  |
| 107.886003  | 48.411914  | 1.309168  |
| 117.337783  | 199.583793 | 5.870042  |
| 124.855384  | 56.130345  | 1.756641  |
| 143.026676  | 148.890687 | 5.337804  |
| 150.474844  | 155.495245 | 5.864879  |
| 174.024040  | 76.668737  | 3.344303  |
| 209.857266  | 34.935567  | 1.837680  |
| 219.516405  | 20.323830  | 1.118280  |
| 220.909632  | 23.966595  | 1.327086  |
| 233.290646  | 192.065044 | 11.231137 |
| 237.230739  | 26.367492  | 1.567898  |
| 258.479819  | 64.947718  | 4.207931  |
| 265.012323  | 74.730008  | 4.964085  |
| 295.032512  | 79.946748  | 5.912195  |
| 310.256370  | 133.265034 | 10.363704 |
| 323.398894  | 99.118503  | 8.034731  |
| 324.840645  | 29.991526  | 2.442008  |
| 340.073238  | 61.752515  | 5.263870  |
| 343.666489  | 54.999169  | 4.737742  |
| 351.762459  | 177.880868 | 15.683999 |
| 361.965714  | 20.709374  | 1.878938  |
| 365.012179  | 167.696930 | 15.343009 |
| 385.242963  | 54.693754  | 5.281418  |
| 404.996175  | 72.260901  | 7.335545  |
| 435.946489  | 58.811371  | 6.426471  |
| 437.692953  | 158.082054 | 17.343238 |
| 443.837958  | 2.788329   | 0.310203  |
| 506.972903  | 37.864434  | 4.811653  |
| 516.246560  | 178.363129 | 23.080240 |
| 543.343409  | 2.872967   | 0.391276  |
| 546.093562  | 5.707425   | 0.781241  |
| 551.341955  | 28.209717  | 3.898503  |
| 556.875679  | 73.666982  | 10.282748 |
| 560.696264  | 29.420522  | 4.134815  |
| 610.183744  | 68.654035  | 10.500374 |
| 640.218802  | 6.905763   | 1.108200  |
| 659.524780  | 2.068950   | 0.342026  |
| 682.897312  | 55.990664  | 9.584050  |
| 718.276162  | 32.585936  | 5.866779  |
| 729.483919  | 120.554876 | 22.043400 |
| 762.078282  | 218.635127 | 41.763568 |
| 794.850291  | 54.058997  | 10.770389 |
| 810.601855  | 66.820424  | 13.576721 |
| 817.038660  | 13.414667  | 2.747265  |
| 818.285831  | 7.714473   | 1.582302  |
| 820.282126  | 15.751156  | 3.238574  |
| 833.215492  | 184.017036 | 38.432040 |
| 844.631668  | 106.272883 | 22.499242 |
| 851.704191  | 224.639832 | 47.957178 |
| 855.126078  | 55.010834  | 11.791158 |
| 857.324247  | 95.298723  | 20.479071 |
| 861.005044  | 62.090822  | 13.400197 |
| 873.659517  | 26.091841  | 5.713800  |
| 879.633829  | 26.310214  | 5.801020  |
| 907.797951  | 48.773086  | 11.098071 |
| 912.202820  | 48.878940  | 11.176125 |
| 915.634278  | 8.075516   | 1.853405  |
| 916.356745  | 14.436801  | 3.315993  |
| 920.904528  | 3.766199   | 0.869352  |
| 925.058918  | 55.785852  | 12.935152 |
| 931.857757  | 0.824672   | 0.192623  |
| 938.467388  | 0.215841   | 0.050773  |
| 961.799008  | 0.083570   | 0.020147  |
| 974.976380  | 29.976442  | 7.325753  |
| 990.806300  | 21.440857  | 5.324870  |
| 994.166699  | 48.981388  | 12.205860 |
| 995.332716  | 28.875779  | 7.204105  |
| 999.284171  | 35.703426  | 8.942871  |
| 1006.171439 | 38.478119  | 9.704293  |
| 1024.888527 | 54.080394  | 13.892952 |
| 1030.768772 | 61.839738  | 15.977431 |
| 1050.253342 | 1.728434   | 0.455014  |
| 1053.623758 | 4.767970   | 1.259207  |
| 1054.129876 | 4.024501   | 1.063370  |
| 1055.111544 | 1.277876   | 0.337960  |
| 1057.660513 | 29.933544  | 7.935650  |
| 1074.182395 | 1.014509   | 0.273157  |
| 1086.560231 | 17.930213  | 4.883344  |
| 1099.195057 | 3.745826   | 1.032049  |
| 1100.983623 | 6.513931   | 1.797637  |
| 1111.530411 | 16.413437  | 4.572976  |
| 1120.710816 | 297.116358 | 83.463808 |
| 1134.012583 | 32.186738  | 9.148985  |
| 1168.259800 | 36.523773  | 10.695304 |
| 1172.097980 | 1.344362   | 0.394965  |
| 1195.836515 | 74.393891  | 22.299091 |
| 1239.814151 | 0.146764   | 0.045609  |
| 1241.682910 | 0.401635   | 0.125003  |
| 1257.132071 | 27.311774  | 8.606149  |
| 1271.608349 | 76.442565  | 24.365016 |
| 1275.596227 | 6.217180   | 1.987855  |
| 1301.371283 | 83.130162  | 27.116767 |
| 1304.884041 | 5.930661   | 1.939783  |

Supplementary Material (ESI) for Chemical Communications  
This journal is (c) The Royal Society of Chemistry 2011

|             |            |           |
|-------------|------------|-----------|
| 1308.793282 | 7.942491   | 2.605589  |
| 1342.555940 | 9.888361   | 3.327628  |
| 1346.408656 | 2.971577   | 1.002864  |
| 1347.501980 | 41.263900  | 13.937271 |
| 1349.859572 | 3.033588   | 1.026416  |
| 1365.589972 | 158.577092 | 54.279875 |
| 1393.872324 | 37.576348  | 13.128516 |
| 1400.954538 | 38.583853  | 13.549014 |
| 1402.780386 | 19.009679  | 6.684094  |
| 1405.963978 | 60.874271  | 21.452901 |
| 1425.563314 | 50.007667  | 17.869038 |
| 1430.910607 | 32.813704  | 11.769170 |
| 1438.385105 | 94.246688  | 33.979685 |
| 1443.260069 | 24.761390  | 8.957724  |
| 1448.320313 | 69.455290  | 25.214364 |
| 1451.082583 | 39.412840  | 14.335338 |
| 1458.556172 | 218.375993 | 79.837352 |
| 1466.016226 | 10.128333  | 3.721815  |
| 1476.977021 | 75.732885  | 28.037308 |
| 1482.502384 | 168.020300 | 62.436022 |
| 1556.597980 | 7.418084   | 2.894318  |
| 1590.756864 | 27.829565  | 11.096558 |
| 2900.462900 | 39.576331  | 28.772719 |
| 2908.724014 | 39.811001  | 29.025765 |
| 3028.025496 | 5.998427   | 4.552763  |
| 3032.557635 | 8.110710   | 6.165183  |
| 3072.304507 | 1.076633   | 0.829106  |
| 3074.901066 | 5.906060   | 4.552051  |
| 3126.999976 | 0.972062   | 0.761903  |
| 3133.857237 | 0.995984   | 0.782365  |
| 3137.519491 | 6.261118   | 4.923981  |
| 3145.350710 | 2.471263   | 1.948346  |
| 3148.266992 | 16.821725  | 13.274561 |
| 3154.139597 | 25.407351  | 20.087152 |
| 3170.491461 | 0.692940   | 0.550681  |
| 3170.770032 | 5.428734   | 4.314609  |
| 3171.493019 | 2.760139   | 2.194182  |
| 3175.874279 | 5.035270   | 4.008336  |
| 3179.546220 | 3.453433   | 2.752290  |
| 3183.013415 | 17.523368  | 13.980868 |
| 3184.298947 | 33.257110  | 26.544614 |
| 3186.213324 | 18.403287  | 14.697664 |
| 3188.058310 | 16.301822  | 13.026882 |
| 3197.316190 | 6.027960   | 4.830967  |
| 3197.833771 | 5.938008   | 4.759647  |

| Temp   |                                             | Transl | Rotat  | Vibrat  | Total   |
|--------|---------------------------------------------|--------|--------|---------|---------|
| ----   |                                             | -----  | -----  | -----   | -----   |
| 298.15 | Entropy (cal/mole-K):                       | 45.716 | 36.295 | 89.477  | 171.488 |
|        | Internal Energy (Kcal/mole):                | 0.889  | 0.889  | 260.750 | 262.527 |
|        | Constant Volume Heat Capacity (cal/mole-K): | 2.981  | 2.981  | 95.882  | 101.844 |

\*\*\*\*\*

**[endo-3a] 2+**

PBE/TZP,DZP

Geometry CYCLE 63  
=====

Energy gradients wrt nuclear displacements  
=====

| Atom  | Cartesian (a.u./angstrom) |           |           |
|-------|---------------------------|-----------|-----------|
|       | X                         | Y         | Z         |
| 1 C   | 0.000158                  | 0.000183  | -0.000085 |
| 2 H   | -0.000162                 | 0.000010  | 0.000081  |
| 3 C   | -0.000190                 | -0.000202 | -0.000128 |
| 4 H   | -0.000036                 | 0.000000  | 0.000062  |
| 5 C   | 0.000274                  | -0.000016 | 0.000018  |
| 6 H   | 0.000054                  | 0.000023  | 0.000144  |
| 7 C   | 0.000167                  | 0.000179  | 0.000044  |
| 8 H   | -0.000300                 | -0.000028 | -0.000359 |
| 9 C   | 0.000251                  | -0.000103 | 0.000201  |
| 10 C  | 0.000104                  | 0.000322  | 0.000017  |
| 11 C  | -0.000037                 | -0.000588 | -0.000130 |
| 12 C  | -0.000483                 | 0.000270  | 0.000347  |
| 13 H  | -0.000014                 | -0.000106 | -0.000053 |
| 14 C  | -0.000506                 | 0.000507  | -0.000519 |
| 15 N  | -0.000141                 | -0.000011 | 0.000016  |
| 16 C  | -0.000189                 | -0.000758 | 0.000025  |
| 17 H  | -0.000018                 | -0.000111 | 0.000272  |
| 18 C  | -0.000231                 | 0.000023  | 0.000289  |
| 19 H  | 0.000061                  | -0.000023 | -0.000065 |
| 20 Cl | -0.000021                 | 0.000122  | 0.000155  |
| 21 C  | -0.000151                 | -0.000697 | -0.000345 |
| 22 C  | -0.000019                 | -0.000115 | -0.000354 |
| 23 C  | 0.000169                  | -0.000013 | -0.000106 |
| 24 C  | -0.000444                 | 0.000257  | 0.000347  |
| 25 C  | 0.000076                  | 0.000512  | 0.000088  |
| 26 N  | 0.000284                  | -0.000364 | -0.000307 |
| 27 Ir | 0.000276                  | 0.000462  | -0.000063 |
| 28 C  | -0.000041                 | 0.000318  | -0.000175 |
| 29 H  | 0.000062                  | -0.000014 | 0.000054  |
| 30 H  | 0.000188                  | 0.000230  | -0.000070 |
| 31 H  | 0.000236                  | -0.000022 | -0.000037 |
| 32 C  | 0.000191                  | -0.000150 | 0.000018  |
| 33 H  | 0.000050                  | -0.000030 | -0.000128 |
| 34 H  | -0.000113                 | 0.000304  | 0.000226  |
| 35 H  | -0.000392                 | -0.000080 | 0.000003  |
| 36 Ir | 0.000875                  | 0.000065  | 0.000510  |
| 37 C  | -0.000167                 | 0.000008  | 0.000006  |
| 38 C  | -0.000203                 | -0.000232 | -0.000134 |
| 39 C  | -0.000001                 | -0.000350 | -0.000205 |
| 40 C  | -0.000067                 | -0.000245 | -0.000079 |
| 41 C  | 0.000061                  | 0.000278  | -0.000185 |
| 42 C  | -0.000432                 | -0.000045 | 0.000215  |
| 43 H  | 0.000182                  | -0.000006 | -0.000132 |
| 44 H  | 0.000141                  | 0.000166  | 0.000016  |
| 45 H  | 0.000193                  | -0.000171 | -0.000120 |
| 46 C  | -0.000079                 | 0.000115  | 0.000238  |
| 47 H  | 0.000000                  | -0.000031 | -0.000011 |
| 48 H  | 0.000146                  | -0.000046 | -0.000105 |
| 49 H  | -0.000059                 | -0.000124 | -0.000015 |
| 50 C  | 0.000193                  | -0.000069 | -0.000061 |
| 51 H  | -0.000028                 | 0.000064  | 0.000020  |
| 52 H  | -0.000059                 | -0.000139 | 0.000069  |
| 53 H  | -0.000007                 | 0.000151  | 0.000029  |
| 54 C  | 0.000176                  | -0.000115 | -0.000014 |
| 55 H  | 0.000065                  | -0.000059 | -0.000049 |
| 56 H  | -0.000127                 | 0.000145  | -0.000011 |
| 57 H  | -0.000055                 | 0.000010  | 0.000135  |
| 58 C  | -0.000180                 | -0.000162 | 0.000004  |
| 59 H  | 0.000141                  | 0.000042  | -0.000009 |
| 60 H  | -0.000002                 | -0.000014 | -0.000053 |
| 61 H  | -0.000005                 | 0.000055  | 0.000072  |
| 62 C  | 0.000268                  | -0.000047 | 0.000154  |
| 63 H  | 0.000081                  | 0.000071  | -0.000089 |
| 64 H  | -0.000346                 | 0.000163  | 0.000087  |
| 65 H  | -0.000040                 | 0.000056  | -0.000011 |
| 66 C  | 0.000084                  | 0.000218  | 0.000138  |
| 67 H  | -0.000031                 | -0.000150 | -0.000082 |
| 68 H  | 0.000089                  | -0.000036 | -0.000090 |
| 69 H  | -0.000057                 | -0.000060 | 0.000123  |
| 70 C  | -0.000227                 | -0.000127 | 0.000067  |
| 71 H  | 0.000156                  | 0.000281  | 0.000026  |
| 72 H  | 0.000027                  | -0.000070 | 0.000039  |
| 73 H  | 0.000130                  | -0.000057 | -0.000092 |
| 74 C  | 0.000028                  | 0.000207  | 0.000180  |
| 75 H  | -0.000152                 | 0.000027  | 0.000021  |
| 76 H  | -0.000037                 | 0.000042  | -0.000017 |
| 77 H  | 0.000248                  | -0.000125 | -0.000133 |
| 78 C  | 0.000121                  | -0.000104 | 0.000154  |
| 79 H  | -0.000007                 | -0.000020 | 0.000045  |
| 80 H  | -0.000231                 | 0.000059  | 0.000011  |
| 81 H  | 0.000079                  | 0.000090  | -0.000149 |

-----  
Geometry Convergence after Step 63

Supplementary Material (ESI) for Chemical Communications  
This journal is (c) The Royal Society of Chemistry 2011

```
-----
current energy                      -17.60126000 Hartree
abs of energy change               0.00012899      0.00100000      T
constrained gradient max           0.00087516      0.00100000      T
constrained gradient rms           0.00019665      0.00066667      T
gradient max                       0.00087516
gradient rms                       0.00019665
cart. step max                     0.00652286      0.01000000      T
cart. step rms                     0.00219634      0.00666667      T
```

Summary of Bonding Energy (energy terms are taken from the energy decomposition above)

```
=====
Electrostatic Energy:              -14.969080433309829      -407.3294      -9393.24      -39301.32
Kinetic Energy:                   19.527067825845677      531.3586      12253.42      51268.31
Coulomb (Steric+OrbInt) Energy:   -5.683039233298416      -154.6434      -3566.16      -14920.82
XC Energy:                        -16.276795270827705      -442.9141      -10213.84      -42734.72
Solvation:                        -0.199412991870775      -5.4263      -125.13      -523.56
-----
Total Bonding Energy:              -17.601260103461048      -478.9547      -11044.96      -46212.10
```

List of All Frequencies:

Intensities  
=====

| Frequency<br>cm-1 | Dipole Strength<br>1e-40 esu2 cm2 | Absorption Intensity (degeneracy not counted)<br>km/mole |
|-------------------|-----------------------------------|----------------------------------------------------------|
| 3.749375          | 0.000000                          | 0.000000                                                 |
| 15.196128         | 0.000000                          | 0.000000                                                 |
| 38.456905         | 299.451646                        | 2.886550                                                 |
| 40.768341         | 380.094494                        | 3.884120                                                 |
| 49.350060         | 249.030499                        | 3.080479                                                 |
| 61.450333         | 113.073548                        | 1.741660                                                 |
| 75.825454         | 68.348424                         | 1.299037                                                 |
| 78.965249         | 74.375499                         | 1.472123                                                 |
| 83.303635         | 289.603459                        | 6.047081                                                 |
| 85.140979         | 203.464507                        | 4.342155                                                 |
| 92.975452         | 149.575408                        | 3.485833                                                 |
| 94.360766         | 5.594978                          | 0.132333                                                 |
| 109.439614        | 33.664612                         | 0.923477                                                 |
| 111.660142        | 287.902954                        | 8.057909                                                 |
| 117.264140        | 54.283514                         | 1.595553                                                 |
| 119.309344        | 7.348312                          | 0.219756                                                 |
| 121.030624        | 16.918270                         | 0.513250                                                 |
| 122.080109        | 157.046680                        | 4.805646                                                 |
| 124.413130        | 24.006355                         | 0.748636                                                 |
| 127.489269        | 21.590083                         | 0.689932                                                 |
| 130.752562        | 17.556281                         | 0.575388                                                 |
| 136.656219        | 115.413221                        | 3.953330                                                 |
| 146.085200        | 85.251753                         | 3.121674                                                 |
| 147.028088        | 111.347568                        | 4.103544                                                 |
| 150.180026        | 310.200055                        | 11.677022                                                |
| 152.223917        | 42.318059                         | 1.614681                                                 |
| 153.657284        | 294.180758                        | 11.330406                                                |
| 157.057206        | 147.664275                        | 5.813148                                                 |
| 160.556320        | 248.421940                        | 9.997592                                                 |
| 162.917314        | 53.010448                         | 2.164745                                                 |
| 178.608634        | 387.726679                        | 17.358261                                                |
| 189.364312        | 457.321434                        | 21.706898                                                |
| 196.143037        | 99.357340                         | 4.884847                                                 |
| 201.578079        | 796.425922                        | 40.240814                                                |
| 220.606195        | 435.195684                        | 24.064695                                                |
| 242.138795        | 127.829819                        | 7.758444                                                 |
| 246.561413        | 566.730965                        | 35.025160                                                |
| 268.354574        | 25.916779                         | 1.743284                                                 |
| 269.951197        | 19.391267                         | 1.312108                                                 |
| 271.231119        | 114.869702                        | 7.809497                                                 |
| 277.747586        | 233.145887                        | 16.231405                                                |
| 279.600591        | 70.760601                         | 4.959155                                                 |
| 281.803920        | 44.475495                         | 3.141564                                                 |
| 284.325114        | 74.863360                         | 5.335346                                                 |
| 293.525197        | 54.413553                         | 4.003414                                                 |
| 295.591157        | 158.960847                        | 11.777678                                                |
| 298.047886        | 49.308078                         | 3.683682                                                 |
| 300.389491        | 70.228336                         | 5.287802                                                 |
| 329.496561        | 224.785281                        | 18.565080                                                |
| 336.758600        | 50.369319                         | 4.251702                                                 |
| 362.913947        | 54.508718                         | 4.958470                                                 |
| 371.650022        | 7.059606                          | 0.657647                                                 |
| 407.783022        | 132.418634                        | 13.534939                                                |
| 410.989165        | 17.120930                         | 1.763745                                                 |
| 425.095827        | 0.884567                          | 0.094253                                                 |
| 429.272334        | 74.488648                         | 8.014955                                                 |
| 430.273026        | 34.374735                         | 3.707333                                                 |
| 436.492370        | 82.306767                         | 9.005136                                                 |
| 440.929536        | 38.507649                         | 4.255928                                                 |
| 465.256484        | 55.331535                         | 6.452726                                                 |
| 484.441730        | 134.338298                        | 16.312460                                                |
| 511.015439        | 454.563009                        | 58.224556                                                |
| 521.060777        | 5.643425                          | 0.737071                                                 |
| 522.702795        | 3.965694                          | 0.519580                                                 |
| 522.778539        | 21.905317                         | 2.870419                                                 |
| 524.138725        | 13.358110                         | 1.754968                                                 |
| 528.389337        | 144.626765                        | 19.154940                                                |

Supplementary Material (ESI) for Chemical Communications  
This journal is (c) The Royal Society of Chemistry 2011

|             |            |            |
|-------------|------------|------------|
| 538.028069  | 0.049878   | 0.006726   |
| 538.266477  | 3.010025   | 0.406112   |
| 559.681163  | 110.301418 | 15.473903  |
| 579.244993  | 58.125214  | 8.439271   |
| 581.141101  | 71.879602  | 10.470449  |
| 587.628014  | 235.089466 | 34.626909  |
| 593.772078  | 8.612391   | 1.281804   |
| 594.769314  | 2.971360   | 0.442978   |
| 597.287176  | 9.232132   | 1.382176   |
| 599.259150  | 135.766395 | 20.393184  |
| 624.019958  | 629.355737 | 98.440259  |
| 645.812790  | 194.687707 | 31.515430  |
| 658.844208  | 63.650313  | 10.511419  |
| 713.099017  | 27.238176  | 4.868621   |
| 729.479868  | 382.887069 | 70.010323  |
| 755.895448  | 452.126267 | 85.664235  |
| 781.130718  | 5.028909   | 0.984636   |
| 785.000291  | 3.370646   | 0.663225   |
| 785.638775  | 10.210403  | 2.010684   |
| 786.093286  | 3.674286   | 0.723978   |
| 788.361659  | 40.047771  | 7.913743   |
| 842.112966  | 221.336395 | 46.719830  |
| 858.378788  | 17.195674  | 3.699783   |
| 891.911086  | 51.653128  | 11.547720  |
| 908.312869  | 15.323167  | 3.488687   |
| 928.528976  | 51.481500  | 11.981873  |
| 930.380382  | 20.948644  | 4.885337   |
| 931.770557  | 18.582053  | 4.339910   |
| 932.085612  | 5.222980   | 1.220260   |
| 932.837366  | 35.235148  | 8.238727   |
| 937.699245  | 3.022248   | 0.710349   |
| 957.353923  | 1.434310   | 0.344186   |
| 985.285339  | 723.608470 | 178.707892 |
| 994.522645  | 123.329576 | 30.743973  |
| 995.608848  | 228.249184 | 56.960796  |
| 996.539710  | 648.015592 | 161.866932 |
| 997.635784  | 300.493083 | 75.142315  |
| 999.543294  | 218.004928 | 54.619283  |
| 1000.124400 | 148.399718 | 37.201904  |
| 1001.579071 | 63.949267  | 16.054577  |
| 1005.024118 | 144.571976 | 36.419894  |
| 1005.498055 | 38.195048  | 9.626454   |
| 1005.775569 | 27.072823  | 6.825158   |
| 1009.232601 | 62.673588  | 15.854549  |
| 1031.648153 | 63.551594  | 16.433729  |
| 1041.688736 | 99.371055  | 25.946330  |
| 1050.056601 | 43.491979  | 11.447218  |
| 1056.540818 | 73.400679  | 19.438575  |
| 1059.516249 | 36.384651  | 9.662820   |
| 1063.236445 | 114.223101 | 30.441207  |
| 1063.610562 | 105.001989 | 27.993567  |
| 1070.742114 | 6.473972   | 1.737536   |
| 1082.849564 | 0.805633   | 0.218667   |
| 1088.209577 | 0.518287   | 0.141371   |
| 1092.708541 | 11.968103  | 3.277991   |
| 1104.086299 | 200.654716 | 55.530357  |
| 1109.248482 | 3.513910   | 0.977007   |
| 1137.337748 | 11.500828  | 3.278662   |
| 1141.627888 | 22.232662  | 6.362006   |
| 1143.641044 | 4.762124   | 1.365113   |
| 1144.395856 | 9.962906   | 2.857856   |
| 1147.214665 | 6.101686   | 1.754578   |
| 1159.120535 | 110.194191 | 32.015875  |
| 1198.130313 | 365.707696 | 109.828797 |
| 1201.509339 | 18.244683  | 5.494669   |
| 1265.104724 | 42.649497  | 13.524414  |
| 1284.347242 | 19.004305  | 6.118043   |
| 1304.389715 | 63.319145  | 20.702390  |
| 1327.245438 | 6.237806   | 2.075206   |
| 1332.733020 | 43.142564  | 14.412097  |
| 1336.617853 | 10.330742  | 3.461121   |
| 1338.530792 | 177.791871 | 59.651083  |
| 1339.010963 | 31.704879  | 10.641144  |
| 1341.954917 | 33.151854  | 11.151257  |
| 1342.983560 | 2.168962   | 0.730131   |
| 1351.625099 | 93.309120  | 31.612469  |
| 1353.133945 | 226.412086 | 76.792440  |
| 1353.822997 | 24.340787  | 8.259896   |
| 1354.624388 | 189.573381 | 64.368638  |
| 1355.205787 | 101.265849 | 34.399040  |
| 1356.537124 | 42.855273  | 14.571827  |
| 1373.211923 | 31.450594  | 10.825413  |
| 1375.473188 | 1.174415   | 0.404904   |
| 1375.955860 | 4.609283   | 1.589703   |
| 1378.950254 | 7.620813   | 2.634074   |
| 1387.118396 | 20.001763  | 6.954403   |
| 1389.575757 | 145.272323 | 50.599145  |
| 1390.690297 | 6.975126   | 2.431423   |
| 1392.340316 | 26.367991  | 9.202387   |
| 1395.600217 | 112.873289 | 39.484830  |
| 1398.960065 | 70.904462  | 24.863196  |
| 1405.439505 | 12.197125  | 4.296825   |
| 1405.984935 | 230.505970 | 81.234575  |
| 1406.574037 | 141.327396 | 49.827262  |
| 1410.886423 | 209.542644 | 74.104152  |
| 1412.028088 | 41.119537  | 14.553573  |
| 1413.499001 | 45.477079  | 16.112619  |
| 1414.754199 | 18.245984  | 6.470329   |
| 1417.322815 | 7.989660   | 2.838410   |

Supplementary Material (ESI) for Chemical Communications  
This journal is (c) The Royal Society of Chemistry 2011

|             |             |            |
|-------------|-------------|------------|
| 1418.408907 | 19.578281   | 6.960719   |
| 1423.260883 | 10.730070   | 3.827940   |
| 1425.008706 | 30.423244   | 10.866786  |
| 1426.057280 | 29.339824   | 10.487514  |
| 1427.101466 | 95.693635   | 34.230715  |
| 1428.549724 | 117.589859  | 42.105934  |
| 1429.478045 | 9.099886    | 3.260555   |
| 1430.291505 | 154.151420  | 55.264998  |
| 1433.590038 | 36.991840   | 13.292571  |
| 1435.487169 | 201.506535  | 72.504760  |
| 1437.103791 | 220.633562  | 79.476326  |
| 1441.982940 | 37.052489   | 13.392313  |
| 1443.585213 | 145.033876  | 52.479531  |
| 1445.118517 | 125.890859  | 45.601144  |
| 1446.192427 | 174.103190  | 63.111846  |
| 1447.190514 | 30.694648   | 11.134390  |
| 1455.501508 | 362.472803  | 132.241009 |
| 1457.529331 | 72.382116   | 26.443969  |
| 1457.538334 | 378.662433  | 138.340798 |
| 1459.830431 | 145.619742  | 53.284481  |
| 1485.988482 | 265.472719  | 98.881128  |
| 1499.309795 | 247.002216  | 92.826141  |
| 1553.396169 | 58.840177   | 22.910484  |
| 1567.005845 | 2159.448657 | 848.186917 |
| 1592.948343 | 56.740247   | 22.655361  |
| 2957.906924 | 5.388201    | 3.994904   |
| 2960.646356 | 5.494928    | 4.077807   |
| 2961.991591 | 5.599310    | 4.157157   |
| 2962.154119 | 12.431440   | 9.230116   |
| 2963.582341 | 3.622364    | 2.690836   |
| 2964.445344 | 2.926457    | 2.174521   |
| 2965.792545 | 6.184198    | 4.597293   |
| 2967.532582 | 9.131680    | 6.792415   |
| 2967.719952 | 2.382994    | 1.772654   |
| 2967.793573 | 1.830308    | 1.361558   |
| 2969.392954 | 21.802944   | 16.227846  |
| 2973.957211 | 17.072270   | 12.726356  |
| 3038.887772 | 5.038276    | 3.837732   |
| 3039.456866 | 2.020501    | 1.539335   |
| 3041.795603 | 23.562080   | 17.964773  |
| 3042.426351 | 7.373274    | 5.622876   |
| 3043.055777 | 2.784464    | 2.123878   |
| 3043.214456 | 1.160908    | 0.885541   |
| 3047.116995 | 24.066274   | 18.381293  |
| 3050.208206 | 9.807866    | 7.498633   |
| 3051.222026 | 1.980685    | 1.514842   |
| 3052.802713 | 9.046002    | 6.922030   |
| 3064.437281 | 3.434130    | 2.637822   |
| 3066.278581 | 4.438468    | 3.411322   |
| 3071.336576 | 1.779116    | 1.369650   |
| 3072.464263 | 12.816208   | 9.870166   |
| 3072.589308 | 7.827316    | 6.028308   |
| 3074.116986 | 6.374611    | 4.911929   |
| 3074.728253 | 1.272476    | 0.980696   |
| 3077.754111 | 1.167429    | 0.900621   |
| 3079.365291 | 21.733792   | 16.775474  |
| 3085.244171 | 1.307400    | 1.011058   |
| 3087.003870 | 0.326540    | 0.252669   |
| 3089.250803 | 0.520582    | 0.403107   |
| 3105.496720 | 0.352636    | 0.274495   |
| 3111.762038 | 2.149575    | 1.676629   |
| 3134.051703 | 0.553879    | 0.435110   |
| 3142.641061 | 9.161868    | 7.217003   |
| 3146.058426 | 2.477320    | 1.953561   |
| 3147.590058 | 2.668783    | 2.105569   |
| 3150.272847 | 50.420064   | 39.813434  |
| 3161.359704 | 9.733546    | 7.712995   |
| 3165.347601 | 52.480103   | 41.638412  |

| Temp   |                                             | Transl | Rotat  | Vibrat  | Total   |
|--------|---------------------------------------------|--------|--------|---------|---------|
| ----   |                                             | -----  | -----  | -----   | -----   |
| 298.15 | Entropy (cal/mole-K):                       | 46.228 | 37.575 | 154.042 | 237.845 |
|        | Internal Energy (Kcal/mole):                | 0.889  | 0.889  | 438.018 | 439.795 |
|        | Constant Volume Heat Capacity (cal/mole-K): | 2.981  | 2.981  | 152.958 | 158.919 |

**TS1 - [endo-3a] 2+**

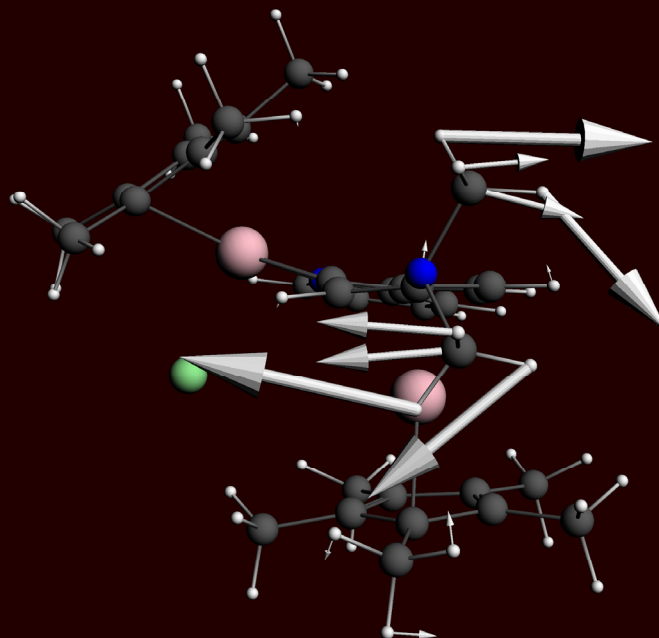

Geometry CYCLE 8

Energy gradients wrt nuclear displacements

| Atom  | Cartesian (a.u./angstrom) |           |           |
|-------|---------------------------|-----------|-----------|
|       | X                         | Y         | Z         |
| 1 C   | -0.000105                 | -0.000110 | -0.000192 |
| 2 H   | -0.000030                 | 0.000098  | 0.000112  |
| 3 C   | 0.000021                  | 0.000043  | 0.000072  |
| 4 H   | 0.000010                  | -0.000017 | 0.000002  |
| 5 C   | -0.000119                 | -0.000058 | -0.000011 |
| 6 H   | -0.000027                 | 0.000001  | -0.000027 |
| 7 C   | 0.000025                  | 0.000110  | -0.000126 |
| 8 H   | 0.000131                  | 0.000024  | -0.000073 |
| 9 C   | -0.000217                 | -0.000042 | -0.000533 |
| 10 C  | -0.000160                 | -0.000011 | -0.000139 |
| 11 C  | -0.000148                 | -0.000120 | 0.000183  |
| 12 C  | 0.000166                  | -0.000191 | 0.000515  |
| 13 H  | 0.000000                  | -0.000076 | -0.000028 |
| 14 C  | -0.000089                 | 0.000515  | 0.000055  |
| 15 N  | -0.000417                 | -0.000659 | -0.000459 |
| 16 C  | -0.000015                 | -0.000182 | -0.000205 |
| 17 H  | -0.000007                 | 0.000029  | -0.000030 |
| 18 C  | 0.000123                  | 0.000095  | -0.000112 |
| 19 H  | -0.000100                 | -0.000022 | 0.000143  |
| 20 Cl | 0.000041                  | -0.000117 | -0.000030 |
| 21 C  | -0.000138                 | -0.000052 | -0.000187 |
| 22 C  | -0.000060                 | -0.000121 | -0.000050 |
| 23 C  | -0.000095                 | 0.000005  | -0.000269 |
| 24 C  | -0.000075                 | -0.000090 | 0.000110  |
| 25 C  | -0.000046                 | -0.000215 | 0.000188  |
| 26 N  | 0.000768                  | 0.000271  | 0.000965  |
| 27 Ir | 0.000112                  | 0.000658  | 0.000145  |
| 28 C  | 0.000075                  | -0.000375 | 0.000282  |
| 29 H  | -0.000066                 | 0.000069  | 0.000017  |
| 30 H  | -0.000040                 | 0.000063  | 0.000012  |
| 31 H  | -0.000032                 | -0.000007 | -0.000056 |
| 32 C  | 0.000452                  | 0.000497  | -0.000040 |
| 33 H  | -0.000071                 | -0.000002 | -0.000074 |
| 34 H  | -0.000089                 | 0.000054  | 0.000096  |
| 35 H  | 0.000024                  | 0.000035  | 0.000074  |
| 36 Ir | 0.000483                  | -0.000198 | -0.000001 |
| 37 C  | 0.000002                  | 0.000025  | 0.000174  |

Supplementary Material (ESI) for Chemical Communications  
This journal is (c) The Royal Society of Chemistry 2011

```

38 C -0.000138 0.000069 0.000159
39 C 0.000102 0.000021 0.000024
40 C -0.000191 0.000061 -0.0000412
41 C -0.000088 -0.000081 0.000081
42 C 0.000138 -0.000008 0.000101
43 H -0.000017 0.000005 -0.000117
44 H 0.000052 0.000166 0.000070
45 H -0.000042 -0.000053 0.000090
46 C 0.000105 -0.000098 -0.000085
47 H 0.000029 -0.000006 -0.000013
48 H -0.000007 -0.000032 0.000061
49 H -0.000071 0.000101 0.000000
50 C -0.000020 -0.000052 -0.000008
51 H -0.000015 0.000025 -0.000034
52 H 0.000026 -0.000013 -0.000011
53 H 0.000005 0.000003 0.000026
54 C 0.000001 0.000060 -0.000028
55 H -0.000021 -0.000043 0.000026
56 H 0.000006 0.000004 -0.000007
57 H -0.000049 0.000022 -0.000046
58 C 0.000002 -0.000023 0.000087
59 H 0.000005 0.000025 -0.000057
60 H -0.000052 0.000047 0.000026
61 H 0.000024 -0.000035 -0.000012
62 C -0.000177 0.000040 -0.000075
63 H 0.000071 -0.000019 -0.000024
64 H 0.000027 0.000040 -0.000024
65 H 0.000119 0.000008 0.000003
66 C -0.000052 0.000001 -0.000042
67 H -0.000048 -0.000024 0.000008
68 H 0.000083 0.000046 0.000028
69 H -0.000037 0.000062 0.000014
70 C 0.000225 -0.000005 0.000013
71 H -0.000189 -0.000079 -0.000085
72 H -0.000028 -0.000037 0.000004
73 H -0.000042 0.000064 -0.000188
74 C 0.000057 -0.000088 0.000055
75 H 0.000014 0.000046 -0.000078
76 H 0.000042 -0.000006 -0.000010
77 H -0.000001 0.000017 -0.000020
78 C -0.000073 -0.000175 0.000039
79 H 0.000001 -0.000025 -0.000035
80 H 0.000003 0.000065 -0.000001
81 H -0.000065 -0.000020 -0.000007

```

-----  
Geometry Convergence after Step 8  
-----

```

current energy -17.57104584 Hartree
abs of energy change 0.00017250 0.00100000 T
constrained gradient max 0.00096464 0.00100000 T
constrained gradient rms 0.00016155 0.00066667 T
gradient max 0.00096464
gradient rms 0.00016155
cart. step max 0.00343365 0.01000000 T
cart. step rms 0.00083448 0.00666667 T

```

Summary of Bonding Energy (energy terms are taken from the energy decomposition above)  
=====

|                                 |                     |           |           |           |
|---------------------------------|---------------------|-----------|-----------|-----------|
| Electrostatic Energy:           | -14.925141864459953 | -406.1338 | -9365.67  | -39185.95 |
| Kinetic Energy:                 | 19.469055468629847  | 529.7800  | 12217.02  | 51116.00  |
| Coulomb (Steric+OrbInt) Energy: | -5.667182711332075  | -154.2119 | -3556.21  | -14879.19 |
| XC Energy:                      | -16.250350020275029 | -442.1945 | -10197.25 | -42665.29 |
| Solvation:                      | -0.197427028992267  | -5.3723   | -123.89   | -518.34   |
| Total Bonding Energy:           | -17.571046156429475 | -478.1325 | -11026.00 | -46132.78 |

List of All Frequencies:

Intensities

=====

| Frequency<br>cm <sup>-1</sup> | Dipole Strength<br>1e-40 esu <sup>2</sup> cm <sup>2</sup> | Absorption Intensity (degeneracy not counted)<br>km/mole |
|-------------------------------|-----------------------------------------------------------|----------------------------------------------------------|
| 104.854548                    | 129.281384                                                | 3.397828                                                 |
| 21.386652                     | 99.296652                                                 | 0.532299                                                 |
| 41.014121                     | 618.386568                                                | 6.357283                                                 |
| 42.685782                     | 411.985063                                                | 4.408012                                                 |
| 49.282033                     | 252.994535                                                | 3.125200                                                 |
| 63.149352                     | 152.085222                                                | 2.407321                                                 |
| 75.363397                     | 11.249191                                                 | 0.212500                                                 |
| 85.243995                     | 191.238393                                                | 4.086175                                                 |
| 89.475630                     | 20.231611                                                 | 0.453747                                                 |
| 98.357483                     | 249.212410                                                | 6.144056                                                 |
| 105.492554                    | 64.689250                                                 | 1.710535                                                 |
| 109.012874                    | 15.997136                                                 | 0.437117                                                 |
| 113.610937                    | 61.241191                                                 | 1.743981                                                 |
| 114.664327                    | 61.781980                                                 | 1.775694                                                 |
| 116.043509                    | 101.010020                                                | 2.938078                                                 |
| 119.995430                    | 23.369811                                                 | 0.702907                                                 |
| 123.719376                    | 53.501554                                                 | 1.659137                                                 |
| 127.171763                    | 100.851579                                                | 3.214782                                                 |
| 135.475451                    | 22.986292                                                 | 0.780562                                                 |

Supplementary Material (ESI) for Chemical Communications  
This journal is (c) The Royal Society of Chemistry 2011

|             |            |            |
|-------------|------------|------------|
| 139.017298  | 39.184782  | 1.365414   |
| 147.303381  | 321.412114 | 11.867330  |
| 150.498478  | 376.700548 | 14.210404  |
| 153.471800  | 8.227122   | 0.316486   |
| 154.572897  | 169.577611 | 6.570220   |
| 154.897861  | 38.423784  | 1.491845   |
| 158.176826  | 80.534149  | 3.193015   |
| 161.701051  | 208.580302 | 8.454038   |
| 168.749666  | 105.762112 | 4.473538   |
| 176.748538  | 421.333385 | 18.666366  |
| 181.197532  | 122.324712 | 5.555774   |
| 192.145250  | 104.992142 | 5.056669   |
| 198.623536  | 194.625448 | 9.689657   |
| 201.859259  | 444.810392 | 22.506174  |
| 204.968974  | 230.362779 | 11.835279  |
| 211.035708  | 199.916364 | 10.575048  |
| 221.057600  | 505.762835 | 28.024020  |
| 223.405977  | 56.365543  | 3.156360   |
| 238.543672  | 180.454513 | 10.789808  |
| 261.148383  | 18.943752  | 1.240028   |
| 267.954316  | 103.803803 | 6.971915   |
| 271.667439  | 146.309148 | 9.962931   |
| 276.452741  | 205.939826 | 14.270504  |
| 278.308718  | 107.535866 | 7.501675   |
| 281.016362  | 4.469517   | 0.314826   |
| 284.863304  | 29.723219  | 2.122318   |
| 292.472753  | 89.699050  | 6.575841   |
| 293.820737  | 65.423838  | 4.818330   |
| 297.384477  | 50.168218  | 3.739599   |
| 299.920118  | 68.414284  | 5.143165   |
| 320.398828  | 264.164881 | 21.215050  |
| 333.486265  | 158.349456 | 13.236483  |
| 362.103701  | 57.130413  | 5.185354   |
| 377.781815  | 13.770728  | 1.303995   |
| 394.889336  | 69.731719  | 6.902141   |
| 404.730635  | 58.548327  | 5.939620   |
| 411.900391  | 19.111221  | 1.973144   |
| 427.012934  | 45.603273  | 4.881071   |
| 427.775734  | 137.678981 | 14.762566  |
| 430.120683  | 81.625063  | 8.800187   |
| 440.213302  | 17.690353  | 1.951991   |
| 442.016826  | 80.943031  | 8.968015   |
| 460.203676  | 324.230637 | 37.400913  |
| 510.628463  | 272.624993 | 34.893839  |
| 517.433304  | 197.717171 | 25.643473  |
| 522.416161  | 11.044337  | 1.446220   |
| 522.813834  | 7.298494   | 0.956441   |
| 523.075798  | 12.169953  | 1.595628   |
| 525.182434  | 91.665839  | 12.066902  |
| 538.539339  | 0.345694   | 0.046665   |
| 538.794668  | 1.657119   | 0.223797   |
| 556.971634  | 142.270384 | 19.862122  |
| 579.796606  | 51.665439  | 7.508512   |
| 584.060431  | 60.667856  | 8.881667   |
| 591.417527  | 15.645088  | 2.319264   |
| 593.722926  | 12.345435  | 1.837250   |
| 596.128872  | 5.894867   | 0.880830   |
| 596.641160  | 23.678227  | 3.541118   |
| 607.426690  | 221.315577 | 33.696433  |
| 638.422000  | 48.861727  | 7.819063   |
| 656.847015  | 49.939112  | 8.222107   |
| 679.156786  | 126.714329 | 21.571177  |
| 712.090070  | 54.983104  | 9.813914   |
| 729.379798  | 387.417411 | 70.828971  |
| 758.066988  | 357.059592 | 67.846330  |
| 782.907178  | 6.175691   | 1.211920   |
| 784.642038  | 1.656681   | 0.325828   |
| 786.452683  | 0.976674   | 0.192531   |
| 789.212132  | 24.202811  | 4.787818   |
| 791.036179  | 48.738131  | 9.663697   |
| 857.370034  | 62.636115  | 13.460810  |
| 861.741719  | 138.477033 | 29.911138  |
| 907.696933  | 233.718009 | 53.175443  |
| 921.709489  | 2.177338   | 0.503035   |
| 927.884936  | 232.282645 | 54.024276  |
| 931.015360  | 1.767421   | 0.412453   |
| 932.100669  | 9.822096   | 2.294801   |
| 932.261149  | 58.104736  | 13.577731  |
| 932.939860  | 21.251702  | 4.969646   |
| 940.643723  | 11.464071  | 2.702975   |
| 959.337662  | 1.385755   | 0.333224   |
| 986.591325  | 824.895367 | 203.992512 |
| 990.347999  | 248.868138 | 61.778192  |
| 992.764433  | 162.882535 | 40.532071  |
| 994.557686  | 753.216451 | 187.770708 |
| 995.576247  | 347.752698 | 86.780691  |
| 998.090305  | 106.174527 | 26.562457  |
| 999.432172  | 129.165031 | 32.357604  |
| 999.567464  | 105.688040 | 26.479881  |
| 1001.240950 | 103.177089 | 25.894048  |
| 1004.336434 | 35.428651  | 8.918913   |
| 1005.476143 | 6.973049   | 1.757408   |
| 1007.736349 | 101.365463 | 25.604424  |
| 1019.140715 | 84.943503  | 21.699133  |
| 1026.160274 | 62.795914  | 16.151939  |
| 1049.716582 | 24.007507  | 6.316801   |
| 1057.133345 | 88.945837  | 23.568583  |
| 1060.068101 | 28.482281  | 7.568095   |
| 1063.341769 | 101.922771 | 27.165779  |

Supplementary Material (ESI) for Chemical Communications  
This journal is (c) The Royal Society of Chemistry 2011

|             |            |            |
|-------------|------------|------------|
| 1065.826066 | 116.552391 | 31.137633  |
| 1071.172961 | 37.144739  | 9.973210   |
| 1083.788888 | 1.239474   | 0.336713   |
| 1088.521928 | 32.115848  | 8.762633   |
| 1089.566232 | 1.346107   | 0.367630   |
| 1100.182833 | 0.766492   | 0.211374   |
| 1111.668288 | 515.017063 | 143.507601 |
| 1132.848603 | 32.884448  | 9.337713   |
| 1138.289156 | 6.762262   | 1.929402   |
| 1142.493852 | 10.959844  | 3.138602   |
| 1144.389865 | 15.059234  | 4.319714   |
| 1146.736806 | 27.232596  | 7.827640   |
| 1149.179839 | 6.203433   | 1.786891   |
| 1165.045047 | 93.693496  | 27.360891  |
| 1187.610897 | 195.115383 | 58.082293  |
| 1255.882364 | 74.148816  | 23.341634  |
| 1262.263578 | 117.239287 | 37.093797  |
| 1276.739103 | 4.919380   | 1.574311   |
| 1305.370243 | 51.481937  | 16.844831  |
| 1313.908124 | 33.077548  | 10.893724  |
| 1316.828369 | 59.412807  | 19.610439  |
| 1331.946863 | 30.956179  | 10.335044  |
| 1336.808372 | 10.589156  | 3.548204   |
| 1340.874095 | 25.643045  | 8.618579   |
| 1342.619973 | 8.513775   | 2.865189   |
| 1351.820834 | 7.660063   | 2.595551   |
| 1352.214226 | 255.404909 | 86.567089  |
| 1352.751073 | 223.727718 | 75.860509  |
| 1353.817408 | 95.595137  | 32.439486  |
| 1354.274094 | 89.146715  | 30.261468  |
| 1354.479824 | 32.176767  | 10.924285  |
| 1364.310674 | 429.220430 | 146.781639 |
| 1373.092974 | 46.029008  | 15.841986  |
| 1375.469427 | 3.138811   | 1.082167   |
| 1375.483070 | 23.309679  | 8.036549   |
| 1379.133320 | 18.451646  | 6.378513   |
| 1384.138108 | 12.538686  | 4.350203   |
| 1388.952789 | 13.322124  | 4.638088   |
| 1390.886710 | 13.710909  | 4.780090   |
| 1391.584232 | 22.002666  | 7.674726   |
| 1399.492728 | 79.154382  | 27.766662  |
| 1403.273299 | 14.573949  | 5.126224   |
| 1407.408951 | 252.035221 | 88.911844  |
| 1408.412748 | 224.082063 | 79.107036  |
| 1410.077574 | 38.180407  | 13.494650  |
| 1411.071299 | 28.019108  | 9.910175   |
| 1413.003371 | 7.546181   | 2.672689   |
| 1414.199779 | 1.946706   | 0.690064   |
| 1416.093938 | 10.937169  | 3.882174   |
| 1416.697091 | 30.257180  | 10.744433  |
| 1421.136015 | 60.480236  | 21.544042  |
| 1423.937458 | 21.431289  | 7.649222   |
| 1424.186267 | 56.310515  | 20.101773  |
| 1425.276167 | 117.454398 | 41.961053  |
| 1426.197731 | 215.083773 | 76.889220  |
| 1427.715849 | 29.556813  | 10.577364  |
| 1428.030241 | 278.331107 | 99.627039  |
| 1432.153632 | 122.481060 | 43.967990  |
| 1435.240520 | 178.982146 | 64.389117  |
| 1437.243367 | 236.035666 | 85.032709  |
| 1440.764252 | 56.844467  | 20.528593  |
| 1443.034741 | 20.286654  | 7.337790   |
| 1443.301007 | 85.037247  | 30.764097  |
| 1445.692608 | 111.274194 | 40.322596  |
| 1449.058554 | 78.827536  | 28.631358  |
| 1451.453605 | 179.668354 | 65.366137  |
| 1454.775067 | 330.284392 | 120.437566 |
| 1459.269242 | 477.801845 | 174.767760 |
| 1462.366348 | 145.803253 | 53.444309  |
| 1464.207725 | 191.298290 | 70.208849  |
| 1485.145306 | 378.083743 | 140.745663 |
| 1502.440622 | 264.275968 | 99.525200  |
| 1554.253178 | 2.801580   | 1.091448   |
| 1592.490470 | 38.516707  | 15.374608  |
| 2900.775992 | 74.431819  | 54.119141  |
| 2910.278793 | 75.530853  | 55.098155  |
| 2957.012506 | 6.894451   | 5.110118   |
| 2959.922511 | 3.025139   | 2.244418   |
| 2961.896167 | 5.076803   | 3.769105   |
| 2962.498980 | 6.070499   | 4.507759   |
| 2962.994030 | 5.160380   | 3.832574   |
| 2964.016523 | 18.184907  | 13.510449  |
| 2965.138838 | 2.057086   | 1.528887   |
| 2966.686010 | 5.128931   | 3.813964   |
| 2967.677358 | 13.426754  | 9.987707   |
| 2968.554327 | 7.844065   | 5.836658   |
| 3021.534947 | 11.771485  | 8.915320   |
| 3034.309590 | 14.468524  | 11.004294  |
| 3039.254344 | 41.818408  | 31.857568  |
| 3040.080502 | 3.427954   | 2.612150   |
| 3040.375746 | 7.317518   | 5.576595   |
| 3042.210362 | 5.259651   | 4.010737   |
| 3044.427736 | 1.857796   | 1.417691   |
| 3044.921828 | 1.848263   | 1.410646   |
| 3049.351513 | 27.071256  | 20.691595  |
| 3051.024872 | 8.249392   | 6.308785   |
| 3052.482054 | 9.830702   | 7.521695   |
| 3054.051239 | 12.677724  | 9.705003   |
| 3067.536402 | 3.068017   | 2.358987   |

Supplementary Material (ESI) for Chemical Communications  
This journal is (c) The Royal Society of Chemistry 2011

|             |           |           |
|-------------|-----------|-----------|
| 3072.204971 | 10.442276 | 8.041247  |
| 3074.202119 | 0.462993  | 0.356767  |
| 3075.145397 | 4.666476  | 3.596936  |
| 3076.013099 | 1.340622  | 1.033648  |
| 3077.639183 | 0.790517  | 0.609828  |
| 3079.748762 | 2.001794  | 1.545300  |
| 3084.585190 | 19.748572 | 15.268998 |
| 3088.938361 | 0.529308  | 0.409822  |
| 3090.418121 | 0.923418  | 0.715309  |
| 3100.695897 | 1.246491  | 0.968783  |
| 3105.794451 | 5.352643  | 4.166957  |
| 3135.524752 | 7.101835  | 5.581602  |
| 3136.606825 | 9.212000  | 7.242560  |
| 3137.656848 | 16.608174 | 13.061872 |
| 3144.667283 | 5.339746  | 4.208946  |
| 3148.419777 | 40.659589 | 32.087337 |
| 3152.732816 | 52.963313 | 41.854328 |
| 3164.917731 | 15.797500 | 12.532244 |

| Temp   |                                             | Transl | Rotat  | Vibrat  | Total   |
|--------|---------------------------------------------|--------|--------|---------|---------|
| ----   |                                             | -----  | -----  | -----   | -----   |
| 298.15 | Entropy (cal/mole-K):                       | 46.228 | 37.599 | 159.572 | 243.399 |
|        | Internal Energy (Kcal/mole):                | 0.889  | 0.889  | 438.448 | 440.226 |
|        | Constant Volume Heat Capacity (cal/mole-K): | 2.981  | 2.981  | 156.824 | 162.786 |

**TS2- [endo-3a] 2+**

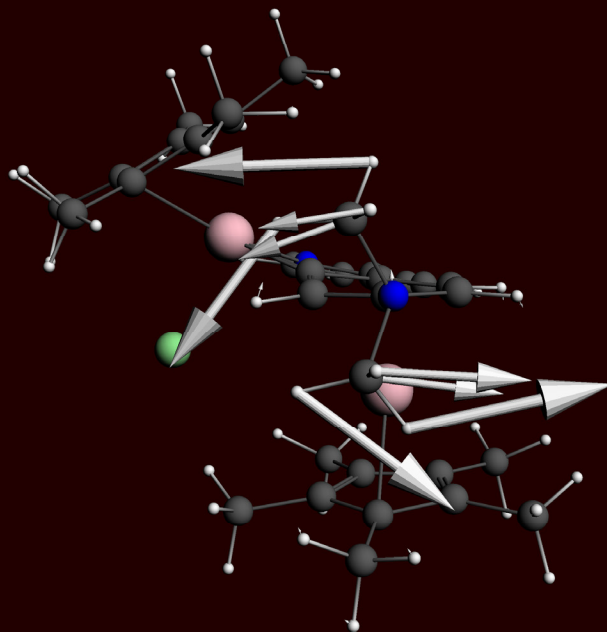

Geometry CYCLE 89

Energy gradients wrt nuclear displacements

| Atom  | Cartesian (a.u./angstrom) |           |           |
|-------|---------------------------|-----------|-----------|
|       | X                         | Y         | Z         |
| 1 C   | 0.000005                  | 0.000029  | -0.000013 |
| 2 H   | 0.000007                  | -0.000001 | -0.000001 |
| 3 C   | 0.000015                  | 0.000003  | 0.000001  |
| 4 H   | -0.000006                 | -0.000004 | -0.000003 |
| 5 C   | 0.000009                  | -0.000002 | -0.000005 |
| 6 H   | -0.000016                 | -0.000004 | 0.000003  |
| 7 C   | -0.000029                 | 0.000034  | -0.000011 |
| 8 H   | -0.000054                 | -0.000188 | -0.000037 |
| 9 C   | 0.000006                  | -0.000020 | -0.000069 |
| 10 C  | -0.000143                 | 0.000024  | -0.000030 |
| 11 C  | 0.000239                  | 0.000174  | -0.000027 |
| 12 C  | -0.000280                 | 0.000177  | -0.000121 |
| 13 H  | -0.000016                 | -0.000007 | 0.000009  |
| 14 C  | -0.000008                 | -0.000060 | -0.000077 |
| 15 N  | 0.000025                  | 0.000036  | 0.000138  |
| 16 C  | 0.000028                  | -0.000089 | 0.000060  |
| 17 H  | -0.000019                 | 0.000024  | 0.000007  |
| 18 C  | 0.000123                  | 0.000073  | -0.000019 |
| 19 H  | 0.000031                  | 0.000164  | 0.000058  |
| 20 Cl | -0.000060                 | -0.000057 | 0.000021  |
| 21 C  | -0.000031                 | -0.000108 | 0.000101  |
| 22 C  | -0.000177                 | 0.000020  | -0.000043 |
| 23 C  | -0.000025                 | -0.000015 | 0.000063  |
| 24 C  | -0.000154                 | 0.000028  | -0.000037 |
| 25 C  | -0.000017                 | -0.000113 | 0.000046  |
| 26 N  | -0.000121                 | 0.000028  | -0.000056 |
| 27 Ir | 0.000534                  | 0.000175  | 0.000226  |
| 28 C  | -0.000090                 | 0.000001  | -0.000163 |
| 29 H  | 0.000001                  | -0.000019 | 0.000027  |
| 30 H  | 0.000049                  | 0.000002  | -0.000064 |
| 31 H  | 0.000003                  | 0.000000  | 0.000020  |
| 32 C  | 0.000045                  | -0.000069 | -0.000023 |
| 33 H  | -0.000005                 | -0.000005 | 0.000015  |
| 34 H  | -0.000007                 | -0.000005 | 0.000016  |
| 35 H  | -0.000014                 | -0.000004 | -0.000004 |
| 36 Ir | 0.000203                  | -0.000672 | -0.000291 |
| 37 C  | -0.000233                 | 0.000201  | -0.000084 |

Supplementary Material (ESI) for Chemical Communications  
This journal is (c) The Royal Society of Chemistry 2011

```

38 C -0.000036 0.000009 0.000245
39 C 0.000003 0.000027 0.000031
40 C 0.000132 0.000040 0.000068
41 C 0.000016 -0.000080 0.000009
42 C 0.000005 0.000010 -0.000008
43 H -0.000018 0.000006 0.000009
44 H 0.000003 -0.000002 -0.000026
45 H -0.000003 0.000025 -0.000005
46 C 0.000023 0.000021 0.000011
47 H 0.000026 0.000003 0.000006
48 H 0.000006 -0.000019 0.000001
49 H -0.000002 -0.000005 0.000005
50 C 0.000043 0.000010 0.000017
51 H 0.000002 -0.000008 0.000019
52 H -0.000015 0.000004 -0.000019
53 H -0.000005 -0.000010 -0.000023
54 C -0.000031 0.000032 -0.000014
55 H -0.000001 0.000001 -0.000006
56 H -0.000019 -0.000005 0.000007
57 H 0.000020 -0.000006 -0.000013
58 C 0.000032 0.000022 -0.000028
59 H -0.000020 0.000002 0.000041
60 H 0.000037 -0.000025 -0.000009
61 H -0.000012 0.000002 -0.000007
62 C 0.000022 0.000046 -0.000047
63 H -0.000006 0.000008 0.000003
64 H 0.000061 -0.000013 0.000029
65 H 0.000004 -0.000006 -0.000015
66 C -0.000017 -0.000007 0.000039
67 H 0.000006 0.000008 0.000012
68 H 0.000007 -0.000012 0.000005
69 H 0.000010 0.000012 -0.000025
70 C 0.000061 0.000104 -0.000124
71 H -0.000048 0.000035 0.000017
72 H -0.000046 0.000037 0.000001
73 H 0.000014 -0.000055 0.000180
74 C -0.000042 0.000023 -0.000025
75 H 0.000004 -0.000002 -0.000022
76 H 0.000004 0.000002 0.000003
77 H 0.000001 -0.000012 0.000016
78 C -0.000015 0.000021 -0.000008
79 H -0.000005 0.000002 0.000020
80 H -0.000011 0.000015 0.000001
81 H -0.000007 -0.000007 -0.000001

```

-----  
Geometry Convergence after Step 89  
-----

```

current energy -17.57656931 Hartree
energy change -0.00001498 0.00100000 T
constrained gradient max 0.00067249 0.00100000 T
constrained gradient rms 0.00008626 0.00066667 T
gradient max 0.00067249
gradient rms 0.00008626
cart. step max 0.00930994 0.01000000 T
cart. step rms 0.00271428 0.00666667 T

```

Summary of Bonding Energy (energy terms are taken from the energy decomposition above)  
=====

|                                 |                     |           |           |           |
|---------------------------------|---------------------|-----------|-----------|-----------|
| Electrostatic Energy:           | -14.925301598698599 | -406.1381 | -9365.77  | -39186.37 |
| Kinetic Energy:                 | 19.469623987421016  | 529.7954  | 12217.37  | 51117.49  |
| Coulomb (Steric+OrbInt) Energy: | -5.666550189620267  | -154.1947 | -3555.81  | -14877.53 |
| XC Energy:                      | -16.250764923941865 | -442.2058 | -10197.51 | -42666.38 |
| Solvation:                      | -0.203576828887520  | -5.5396   | -127.75   | -534.49   |
|                                 | -----               | -----     | -----     | -----     |
| Total Bonding Energy:           | -17.576569553727236 | -478.2828 | -11029.47 | -46147.28 |

List of All Frequencies:

Intensities  
=====

| Frequency<br>cm <sup>-1</sup> | Dipole Strength<br>1e-40 esu <sup>2</sup> cm <sup>2</sup> | Absorption Intensity (degeneracy not counted)<br>km/mole |
|-------------------------------|-----------------------------------------------------------|----------------------------------------------------------|
| -----                         | -----                                                     | -----                                                    |
| -94.887231                    | 79.662055                                                 | -1.894686                                                |
| 18.107168                     | 0.000000                                                  | 0.000000                                                 |
| 42.177635                     | 769.130279                                                | 8.131304                                                 |
| 46.847316                     | 93.423870                                                 | 1.097035                                                 |
| 50.413818                     | 338.087444                                                | 4.272250                                                 |
| 67.781457                     | 193.622175                                                | 3.289607                                                 |
| 77.431991                     | 96.098176                                                 | 1.865149                                                 |
| 84.683141                     | 171.671314                                                | 3.643953                                                 |
| 89.617958                     | 16.960326                                                 | 0.380985                                                 |
| 97.247438                     | 164.223722                                                | 4.003060                                                 |
| 106.757087                    | 19.848773                                                 | 0.531139                                                 |
| 110.027423                    | 46.866844                                                 | 1.292542                                                 |
| 113.474291                    | 172.673492                                                | 4.911354                                                 |
| 116.353011                    | 29.156431                                                 | 0.850335                                                 |
| 118.069519                    | 60.673982                                                 | 1.795636                                                 |
| 120.796634                    | 42.452253                                                 | 1.285386                                                 |
| 122.843380                    | 132.241527                                                | 4.071905                                                 |
| 128.583022                    | 37.137555                                                 | 1.196947                                                 |
| 132.432531                    | 25.977107                                                 | 0.862310                                                 |

Supplementary Material (ESI) for Chemical Communications  
This journal is (c) The Royal Society of Chemistry 2011

|             |            |            |
|-------------|------------|------------|
| 139.853631  | 72.553432  | 2.543371   |
| 144.642122  | 267.863655 | 9.711507   |
| 148.628307  | 134.938783 | 5.027087   |
| 153.506876  | 156.200664 | 6.010198   |
| 154.467673  | 225.118316 | 8.716186   |
| 155.483863  | 41.164103  | 1.604287   |
| 159.474505  | 65.208860  | 2.606609   |
| 160.333624  | 108.404430 | 4.356620   |
| 169.928051  | 237.532077 | 10.117318  |
| 173.896414  | 455.382411 | 19.849289  |
| 184.279512  | 348.497976 | 16.097387  |
| 186.677311  | 211.513847 | 9.897110   |
| 198.090576  | 303.174718 | 15.053409  |
| 199.386688  | 85.914387  | 4.293783   |
| 211.960866  | 263.825079 | 14.016831  |
| 215.330437  | 224.021225 | 12.091291  |
| 227.662821  | 512.538905 | 29.248057  |
| 235.846603  | 38.343253  | 2.266714   |
| 243.144127  | 34.864801  | 2.124854   |
| 257.236031  | 15.125066  | 0.975230   |
| 267.815798  | 78.068078  | 5.240681   |
| 274.019901  | 63.764562  | 4.379652   |
| 277.439312  | 370.122678 | 25.739006  |
| 281.673392  | 18.856242  | 1.331310   |
| 284.553030  | 44.397481  | 3.166647   |
| 288.373440  | 87.140743  | 6.298753   |
| 292.762986  | 64.905294  | 4.762932   |
| 297.098187  | 72.385691  | 5.390522   |
| 298.301838  | 64.750235  | 4.841449   |
| 300.264566  | 66.945566  | 5.038531   |
| 322.104011  | 242.038932 | 19.541569  |
| 332.311251  | 87.518765  | 7.289946   |
| 361.882496  | 68.214110  | 6.187566   |
| 380.254389  | 21.949721  | 2.092095   |
| 398.915535  | 72.875352  | 7.286848   |
| 403.044751  | 48.662618  | 4.916169   |
| 411.278926  | 19.927572  | 2.054324   |
| 421.455311  | 267.382272 | 28.246342  |
| 427.592648  | 91.371141  | 9.793036   |
| 430.301798  | 44.539876  | 4.803969   |
| 439.091858  | 12.211242  | 1.343981   |
| 443.713450  | 102.073568 | 11.352564  |
| 447.775948  | 167.395737 | 18.788116  |
| 506.588163  | 60.316459  | 7.658945   |
| 516.686391  | 438.310410 | 56.765815  |
| 522.017241  | 11.326743  | 1.482067   |
| 522.980557  | 1.949577   | 0.255567   |
| 523.243849  | 19.424983  | 2.547668   |
| 525.966377  | 132.876768 | 17.518024  |
| 538.196960  | 0.636176   | 0.085822   |
| 539.593126  | 2.344779   | 0.317137   |
| 556.024306  | 184.704394 | 25.742402  |
| 580.275556  | 50.387947  | 7.328904   |
| 584.540573  | 56.865731  | 8.331887   |
| 590.717328  | 14.437781  | 2.137757   |
| 593.234984  | 6.392602   | 0.950566   |
| 595.345057  | 6.832895   | 1.019651   |
| 596.210247  | 26.950434  | 4.027572   |
| 609.591109  | 239.251025 | 36.556996  |
| 634.758408  | 42.712572  | 6.795826   |
| 653.413763  | 21.508307  | 3.522675   |
| 680.567367  | 159.747246 | 27.251008  |
| 714.634128  | 61.301533  | 10.980779  |
| 730.229030  | 381.265661 | 69.785446  |
| 758.534158  | 372.788882 | 70.878769  |
| 783.181687  | 6.459071   | 1.267975   |
| 785.771859  | 1.445795   | 0.284762   |
| 786.498024  | 1.161263   | 0.228932   |
| 789.602660  | 14.675780  | 2.904610   |
| 793.151423  | 194.866831 | 38.741114  |
| 861.198832  | 21.165899  | 4.568969   |
| 866.571355  | 180.061464 | 39.111383  |
| 905.509514  | 38.878927  | 8.824403   |
| 923.546963  | 163.584896 | 37.868688  |
| 927.145992  | 28.852708  | 6.705216   |
| 931.796611  | 2.515466   | 0.587513   |
| 932.278841  | 6.970559   | 1.628889   |
| 932.567368  | 27.950806  | 6.533601   |
| 934.355365  | 16.159390  | 3.784558   |
| 940.195125  | 11.155475  | 2.628961   |
| 959.103057  | 2.176151   | 0.523157   |
| 985.387711  | 790.709219 | 195.299897 |
| 989.044166  | 285.515135 | 70.782010  |
| 992.318731  | 204.275408 | 50.809550  |
| 994.058200  | 682.403963 | 170.032297 |
| 994.918423  | 376.237000 | 93.826830  |
| 997.547035  | 150.570838 | 37.648902  |
| 998.910566  | 24.366182  | 6.100876   |
| 999.537567  | 178.787612 | 44.793460  |
| 1000.851738 | 134.506891 | 33.743673  |
| 1004.543809 | 32.777923  | 8.253314   |
| 1005.229813 | 5.590430   | 1.408603   |
| 1008.012100 | 111.810635 | 28.250552  |
| 1022.276213 | 98.099323  | 25.136936  |
| 1026.747747 | 48.940182  | 12.595268  |
| 1049.387000 | 27.663127  | 7.276374   |
| 1057.542279 | 90.193979  | 23.908556  |
| 1060.416250 | 29.858113  | 7.936277   |
| 1063.283949 | 111.300401 | 29.663614  |

Supplementary Material (ESI) for Chemical Communications  
This journal is (c) The Royal Society of Chemistry 2011

|             |            |            |
|-------------|------------|------------|
| 1065.296271 | 109.923143 | 29.351994  |
| 1071.787040 | 6.729982   | 1.808009   |
| 1076.396750 | 35.876077  | 9.679555   |
| 1084.253112 | 0.421251   | 0.114485   |
| 1089.385229 | 0.841447   | 0.229766   |
| 1096.713930 | 13.205946  | 3.630287   |
| 1113.338788 | 476.730018 | 133.038674 |
| 1132.007708 | 35.510855  | 10.076010  |
| 1137.804637 | 4.198320   | 1.197351   |
| 1142.818927 | 12.818606  | 3.671946   |
| 1144.686182 | 13.075571  | 3.751675   |
| 1146.943850 | 30.158988  | 8.670357   |
| 1149.445260 | 8.253814   | 2.378050   |
| 1172.883779 | 117.324513 | 34.492273  |
| 1191.638236 | 197.915830 | 59.115726  |
| 1252.775326 | 50.258950  | 15.782096  |
| 1264.995972 | 138.266924 | 43.841511  |
| 1273.669678 | 2.652360   | 0.846774   |
| 1306.479390 | 61.570790  | 20.163010  |
| 1306.887934 | 51.965992  | 17.022982  |
| 1311.568083 | 33.757171  | 11.097750  |
| 1331.799787 | 40.020955  | 13.359938  |
| 1336.750438 | 10.176164  | 3.409671   |
| 1340.534357 | 41.376570  | 13.903063  |
| 1342.620422 | 2.634645   | 0.886652   |
| 1351.320302 | 42.438264  | 14.374541  |
| 1352.071631 | 264.781749 | 89.735816  |
| 1352.903595 | 246.403650 | 83.558774  |
| 1354.099727 | 39.035928  | 13.249309  |
| 1354.456808 | 26.256798  | 8.914254   |
| 1354.636098 | 105.293289 | 35.752088  |
| 1360.935891 | 398.845472 | 136.056847 |
| 1373.110011 | 43.239418  | 14.882067  |
| 1374.775781 | 12.020618  | 4.142254   |
| 1375.845206 | 7.220485   | 2.490084   |
| 1379.774335 | 14.388142  | 4.976120   |
| 1384.858454 | 15.707705  | 5.452507   |
| 1388.351987 | 18.837371  | 6.555381   |
| 1390.376904 | 17.923236  | 6.246360   |
| 1391.322579 | 16.125012  | 5.623490   |
| 1399.896133 | 77.960514  | 27.355747  |
| 1403.388621 | 28.205866  | 9.921914   |
| 1406.960130 | 84.013387  | 29.628410  |
| 1407.947212 | 130.477592 | 46.046898  |
| 1409.254924 | 299.271399 | 105.714083 |
| 1411.058100 | 22.633214  | 8.005145   |
| 1411.887796 | 4.189418   | 1.482627   |
| 1414.548960 | 0.421863   | 0.149578   |
| 1415.335532 | 10.636981  | 3.773600   |
| 1417.008761 | 28.541287  | 10.137343  |
| 1420.128291 | 53.992990  | 19.219542  |
| 1424.006084 | 21.428684  | 7.648661   |
| 1425.027622 | 61.213317  | 21.864888  |
| 1425.969091 | 20.661206  | 7.384887   |
| 1426.549566 | 218.063489 | 77.973655  |
| 1427.653309 | 120.787501 | 43.223788  |
| 1428.034419 | 174.440925 | 62.440321  |
| 1433.267919 | 292.234824 | 104.987457 |
| 1436.060015 | 216.619909 | 77.973859  |
| 1437.531054 | 65.444356  | 23.581287  |
| 1441.626293 | 59.572809  | 21.526769  |
| 1444.030514 | 110.260388 | 39.909286  |
| 1444.736243 | 114.777564 | 41.564603  |
| 1446.002696 | 67.123069  | 24.328704  |
| 1448.012154 | 190.120128 | 69.004653  |
| 1454.162771 | 360.232150 | 131.302671 |
| 1456.359928 | 356.837516 | 130.261867 |
| 1458.517205 | 228.769366 | 83.634891  |
| 1461.002895 | 111.009292 | 40.652614  |
| 1470.122471 | 255.684175 | 94.218337  |
| 1480.951463 | 281.433619 | 104.470788 |
| 1502.879362 | 255.510883 | 96.252406  |
| 1554.020542 | 2.824294   | 1.100132   |
| 1592.015241 | 38.559442  | 15.387074  |
| 2901.248650 | 63.748384  | 46.358801  |
| 2909.078566 | 77.448867  | 56.474005  |
| 2956.118312 | 7.458931   | 5.526834   |
| 2960.322044 | 2.825218   | 2.096375   |
| 2961.843975 | 4.018987   | 2.983712   |
| 2962.010235 | 8.154235   | 6.054076   |
| 2963.150752 | 4.200685   | 3.119981   |
| 2964.635649 | 14.917844  | 11.085505  |
| 2964.647794 | 5.810149   | 4.317560   |
| 2967.096455 | 3.764227   | 2.799533   |
| 2967.677107 | 13.836312  | 10.292362  |
| 2968.793342 | 9.038016   | 6.725602   |
| 3021.417809 | 14.106581  | 10.683428  |
| 3032.923701 | 17.373720  | 13.207857  |
| 3038.165920 | 42.933066  | 32.695009  |
| 3039.397708 | 7.464930   | 5.687106   |
| 3040.220573 | 2.915345   | 2.221637   |
| 3043.292284 | 0.869267   | 0.663093   |
| 3043.483083 | 2.175915   | 1.659934   |
| 3044.101963 | 4.428901   | 3.379350   |
| 3049.490160 | 31.033370  | 23.721068  |
| 3052.548773 | 11.607931  | 8.881688   |
| 3054.500991 | 2.210536   | 1.692451   |
| 3055.204050 | 15.554040  | 11.911364  |
| 3067.733130 | 4.360637   | 3.353093   |

Supplementary Material (ESI) for Chemical Communications  
This journal is (c) The Royal Society of Chemistry 2011

|             |           |           |
|-------------|-----------|-----------|
| 3071.996585 | 8.908583  | 6.859736  |
| 3073.211893 | 0.500837  | 0.385804  |
| 3073.839270 | 5.251367  | 4.046053  |
| 3075.864468 | 0.760756  | 0.586530  |
| 3077.894983 | 1.496085  | 1.154219  |
| 3082.365654 | 3.955833  | 3.056330  |
| 3084.773630 | 18.181925 | 14.058573 |
| 3089.119268 | 0.777980  | 0.602395  |
| 3090.775868 | 0.808744  | 0.626551  |
| 3095.449588 | 12.625992 | 9.796418  |
| 3102.573098 | 0.989542  | 0.769545  |
| 3120.499745 | 2.690979  | 2.104808  |
| 3135.813540 | 0.961732  | 0.755931  |
| 3140.819562 | 15.300341 | 12.045426 |
| 3145.497375 | 1.470741  | 1.159588  |
| 3150.842988 | 33.903442 | 26.776180 |
| 3152.345934 | 88.718257 | 70.101117 |
| 3163.178571 | 17.421457 | 13.812944 |

| Temp   |                                             | Transl | Rotat  | Vibrat  | Total   |
|--------|---------------------------------------------|--------|--------|---------|---------|
| ----   |                                             | -----  | -----  | -----   | -----   |
| 298.15 | Entropy (cal/mole-K):                       | 46.228 | 37.578 | 152.335 | 236.141 |
|        | Internal Energy (Kcal/mole):                | 0.889  | 0.889  | 437.832 | 439.610 |
|        | Constant Volume Heat Capacity (cal/mole-K): | 2.981  | 2.981  | 154.797 | 160.759 |

## References

1. J. Sandström, *Dynamic NMR spectroscopy*, Academic Press, London, 1982.
2. B. W. Tattershall, in *DNM3RUN and N3PLOT for Windows*, Newcastle University, Newcastle, England, Editon edn., 2007.
3. A. D. Becke, *Phys. Rev. A*, 1988, **38**, 3098-3100.
4. J. P. Perdew, *Phys. Rev. B*, 1986, **33**, 8822.
5. J. P. Perdew, *Phys. Rev. B*, 1986, **34**, 7406.
6. J. P. Perdew, K. Burke and M. Ernzerhof, *Phys. Rev. Lett.*, 1996, **77**, 3865-3868.
7. J. Tao, J. P. Perdew, V. N. Staroverov and G. E. Scuseria, *Phys. Rev. Lett.*, 2003, **91**, 146401.
8. G. TeVelde, F. M. Bickelhaupt, S. J. A. vanGisbergen, C. Fonseca-Guerra, E. J. Baerends, J. G. Snijders and T. Ziegler, *J. Comput. Chem.*, 2001, **22**, 931-967.
9. E. J. Baerends, J. Autschbach, A. Bérces, F. M. Bickelhaupt, C. Bo, P. M. Boerrigter, L. Cavallo, D. P. Chong, L. Deng, R. M. Dickson, D. E. Ellis, M. vanFaassen, L. Fan, T. H. Fischer, C. F. Guerra, S. J. A. vanGisbergen, A. W. Götz, J. A. Groeneveld, O. V. Gritsenko, M. Grüning, F. E. Harris, P. v. Hoek, C. R. Jacob, H. Jacobsen, L. Jensen, G. vanKessel, F. Kootstra, M. V. Krykunov, E. vanLenthe, D. A. McCormack, A. Michalak, J. Neugebauer, V. P. Nicu, V. P. Osinga, S. Patchkovskii, P. H. T. Philipsen, D. Post, C. C. Pye, W. Ravenek, J. I. Rodríguez, P. Ros, P. R. T. Schipper, G. Schreckenbach, J. G. Snijders, M. Solà, M. Swart, D. Swerhone, G. teVelde, P. Vernooijs, L. Versluis, L. Visscher, O. Visser, F. Wang, T. A. Wesolowski, E. M. vanWezenbeek, G. Wiesenekker, S. K. Wolff, T. K. Woo, A. L. Yakovlev and T. Ziegler, in *Amsterdam Density Functional*, ed. SCM, Department of Theoretical Chemistry, Vrije Universiteit Amsterdam, The Netherlands, Editon edn., 2009.
10. S. H. Vosko, L. Wilk and M. Nusair, *Can. J. Phys.*, 1980, **58**, 1200-1211.
11. E. vanLenthe, E. J. Baerends and J. G. Snijders, *J. Chem. Phys.*, 1993, **99**, 4597-4610.
12. E. vanLenthe, A. E. Ehlers and E. J. Baerends, *J. Chem. Phys.*, 1999, **110**, 8943-8953.
13. E. vanLenthe and E. J. Baerends, *J. Comp. Chem.*, 2003, **24**, 1142-1156.
14. E. D. Glendening, J. K. Badenhoop, A. E. Reed, J. E. Carpenter, J. A. Bohmann, C. M. Morales and F. Weinhold, in *NBO*, Theoretical Chemistry Institute, University of Wisconsin, Madison, Editon edn., 2001.
15. A. Klamt and G. Schüürmann, *J. Chem. Soc.: Perkin Trans. 2*, 1993, 799-805.
16. A. Klamt, *J. Phys. Chem.*, 1995, **99**, 2224-2235.
17. A. Klamt and V. Jones, *J. Chem. Phys.*, 1996, **105**, 9972-9981.
